# Supplementary material for: Extracellular Vesicles of Minimalistic Mollicutes as Mediators of Immune Modulation and Horizontal Gene Transfer
Source: Research Square preprint supplement (doi:10.21203/rs.3.rs-5564984/v1), 2025-01-13
Supplement: Supplementary file 1 [file 9893518571ac6e9780ada795.xlsx]

## Sheet: MmcGM12 proteomics
Leading_Protein	PG.ProteinDescriptions	IBAQ Bac_Mmc_GM12_1	IBAQ Bac_Mmc_GM12_2	IBAQ Bac_Mmc_GM12_3	IBAQ EV_Mmc_GM12_1	IBAQ EV_Mmc_GM12_2	IBAQ EV_Mmc_GM12_3	Seen in # reps in Bac	Seen in # reps in EV	rAbu Bac_Mmc_GM12_1	rAbu Bac_Mmc_GM12_2	rAbu Bac_Mmc_GM12_3	rAbu EV_Mmc_GM12_1	rAbu EV_Mmc_GM12_2	rAbu EV_Mmc_GM12_3	locus_tag	amino acid sequence leading protein
CP001621.1	gene=dnaA_1 locus_tag=MMCAP1_0001 protein=chromosomal replication initiator protein DnaA protein_id=ACU79064.1 location=1..1353 gbkey=CDS;gene=dnaA_2 locus_tag=MMCAP1_0911 protein=chromosomal replication initiator protein DnaA protein_id=ACU79318.1 location=1078308..1079660 gbkey=CDS	379.6;379.6	339.7;339.7	371.7;371.7	26.1;26.1	28.8;28.8	16.4;16.4	3	3	254.899	285.261	284.878	47.3597	51.453	29.3624	MMCAP1_0001	MNVNDILKELKLSLMANKNIDESVYNDYIKTINIHKKGISDYIVVVKSQFGLLAIKQFRQTIENEIKNILKEPVNISFTYEQEYKKQLEKDELINKDHSDIITKKVKKINENTFENFVIGASNEQAFIAVQTVSKNPGISYNPLFIYGESGMGKTHLLKAAKNYIESNFSDLKVSYMSGDEFARKAVDILQKTHKEIEQFKNEVCQNDVLIIDDVQFLSYKEKTNEIFFTIFNNSIENDKQLFFSSDKSPELLNGFDNRLITRFNMGLSIAIQKLDNKTATAIIKKEIKNQNIKSEVTSEAINFISNYYSDDVRKIKGSVSRLNFWSQQNPEEKIITIEIISGLFRDIPTSKLGILNVKKIKEVVSEKYGISVNAIDGKARSKSIVTARHIAMFLTKEI…
CP001621.10	locus_tag=MMCAP1_0010 protein=ribose/galactose ABC transporter, ATP-binding component protein_id=ACU79528.1 location=complement(13525..15141) gbkey=CDS	385.1	456.9	426.6	413.1	441.4	456.4	3	3	258.593	383.679	326.955	749.589	788.588	817.135	MMCAP1_0010	MNKEQKIDYAIEMQNITKMFLNGAIVANDDITIKVKKGDIHALVGENGAGKSTLMSILFGLYQPTSGTIKVNGKEEVISNPIKANKLGIGMVHQHFKLVEVNTVLENIILGVEQTKSNIFLNKTKMRSELIDIMNKYDLYVDLDAKIQDISVGLQQRVEILKVLYRKADILVFDEPTAVLTPQQIQSLLQIMKNLQKAGKTIIFISHKMDEIKQVANIATVIRLGKKIVDLDVSMVSGNEIAEAMVGRKLVEVKNKYKKPLSDEPILDVINLTVKKDTNHKVYGLETFNIKVRPGEIVAVAGVEGNGQRELIQAITGLVKPVSGGIVYKKINIVNSNIKTRYDMGMSHIPEDRHKYGMLLDFSVEENIVSQEIDKKPFSQFGFINKKAISRYAQLIIKE…
CP001621.100	locus_tag=MMCAP1_0108 protein=putative liporotein protein_id=ACU79597.1 location=complement(136200..137312) gbkey=CDS	946.6	1115.4	1114.7	1000.2	971.7	1004.1	3	3	635.637	936.651	854.329	1814.91	1736	1797.73	MMCAP1_0108	MKKLLSIITGFSLLITPSLFAISCSSKVQVISKFDDITSIKNTGAFKNNQAFISRNELKEIVNSNNTTNSSTASSTAVMTSTSTTSTGTQPNNNDAKYASERLKALAANNFTKNKKQAWDSLQNTSMTFYKKVEPTAVNVLGYEQITKDNVEKLEKNLKTVFLVFKDNTKETEKLEVELLPEINNGNKVIDNGSLYLDLLEKPENLKLANQKSIIEVLRPEITKIKVVLQNTKNNNSTNKEDIKNTEVFNLLIKQLSIYLANTVKYFNSESGIITTNPTFSYKTRSNQIYDYIVKNKKDELYKKLETAFTSEFNKINFIDIFKDFQFDENNSNDNKKITTKIIKSSTNSSTSSSNSSTTTTTEPSSTTTR
CP001621.101	locus_tag=MMCAP1_0109 protein=apurinic endonuclease Apn1 protein_id=ACU79823.1 location=complement(137338..138207) gbkey=CDS	1872.6	1365.8	1519.7	230.1	230	257.5	3	3	1257.44	1146.92	1164.73	417.527	410.909	461.026	MMCAP1_0109	MNKVLLGCHVSMNKQNNYLVGSVNEAISYKANTFMIFTGPPQSTLRTNTNHLYINQMHELMNSYKIDAKDLVVHAPYIINIANSVDQNKWKFAVDFLIQEIKRCEEIKIPTLVLHPGSHTTGNYKDSLNQIIKALDIVSNYQVNVKIALETMSGKGTEVCSKLEDFKYILDNVKNKDKVGVCLDTCHLHDAGYDLSKWDEFKEQMKQNFDLNKVLCIHLNDSKNMISSHKDRHANIGYGYVGFDTLVNVVFDKDFSNISKILETPYIDKKPPYKIEIEDLLNKTFTNRL
CP001621.102	locus_tag=MMCAP1_0110 protein=riboflavin kinase protein_id=ACU79348.1 location=complement(138200..138952) gbkey=CDS	64.1	44.1	57.4	2.3	3.7	2	3	3	43.0428	37.0327	43.9925	4.17346	6.61028	3.58078	MMCAP1_0110	MNNQIIALFCDFKYITTKLLNKFNKNQLIIFGYSLNKDDFDYICSDYQLEIFKNQNYKFIDLKNENIDQLVKKYQISKIHITKSFKNYDHFLNFFPNTITEDDLLDINNIKKALINADINTFYKIAGFNYTFSGIVTHCNHLGRTIGFPTANILTNDSLVIKNGVYLVKVIIGDKNIQFGMGDHWINRNNLKVFETYIFNFSNDIYNSKITFELLDYIRDNQKINSLDQLKTLLNNDKKECLKRLEKYNE
CP001621.103	locus_tag=MMCAP1_0112 protein=peptidase, S41 family protein_id=ACU79453.1 location=complement(139166..141445) gbkey=CDS	18.3	16.9	17	30.9	35.6	25.6	3	3	12.2884	14.1917	13.0291	56.0695	63.6016	45.834	MMCAP1_0112	MKITAILSSLFLSPTLLNSSSILTVNNQTKIETKEFNLDNLTIKGRRENRKIQALLHNDVFYTSINEFLKSVDSVINYSDLNISFQDNKTTVKLNSDPNFYIEFDANKKKITVSNNKIFTKILKDYKRGEEDLKIKFLKEKNLNNTNQFEIDLSKYDIDILKDQNNLYLPAILLNQVFLSESNIQTYFNGDDFKIFKFYEALSFPGTFYLKQSDKNNEKTIPLGLRKFQYEYLSFLFDNYYAIKLNNNISYKEHFKKYQSKILSESSNEHYLVIKQIINELDDPHSAYVLDGYYDKDRDFHKKIFDSQKRVKNKNEVLELLAKNDPNKIDYELKSISNDTSVISFSKFDEKSAEYIQKALREAQSKNVKNIIFNLTQNGGGYIGTAYEIMGFLTDKPFK…
CP001621.104	locus_tag=MMCAP1_0113 protein=glycosyltransferase protein_id=ACU79413.1 location=141783..143027 gbkey=CDS	174.5	261.6	200.2	132.9	132.3	139.7	3	3	117.176	219.677	153.437	241.153	236.362	250.118	MMCAP1_0113	MFAYTKNKKKLAKHKPKKNRSFAIVIPAHNESMVVGKLIDSIKAQKYDGVIDIYLVADNCTDNRKTYNVGIEKGITVLERFHSTLKGGNFAIRHGWRYIRDNNLLDKYDCFCSFDADNLLDENWVYEVNKTFDFYNDIEVVTTYRNSKNYADNWISSACSIQFLKESDIINKGRATLNHSSYVNGTGFCITRKIFEQTNWWDFNSLSHDIEFTQWLMLNKIKTGYAPNACFYDEQPIDFKNSWKQRMRWCVGFKQVWKIYRSEMIKNMFTFKINKIKLWVNFTMIFPAVITLLINLLFWLITFGLIISNYIVNYLNSSLVIIEQANNYLRDLIIYCTTTPIVIFGIIFINYLLWGFIIVARNKKSIQATSWQKFKSIFTYPFFMLTYIPISFLALFKST…
CP001621.105	locus_tag=MMCAP1_0114 protein=glycosyltransferase protein_id=ACU79545.1 location=complement(143101..144021) gbkey=CDS	107.9	83.2	86.7	263.9	69.2	301.4	3	3	72.4543	69.8667	66.4486	478.859	123.63	539.624	MMCAP1_0114	MSNKKLCTIIIPCYNMQDFLNQCLDSIYQNKESEKYLDVLIIDDGSTDNTIKIANKYLKKHKNIFIYSKPNAHWGSVINYVKHNKLINTKYAFILDADDRISKDFTNLLINVVEPSNVDLGIFKTKILYKNKNSIVVNPRWLSKKQKTFLPMIIPCSTIFKTDIFYKSVDLVEKVPYQDYVLYSWMYLNSTNVQFLSHTIGTYWYSRPNNTMSSSWNDKRIAGEKALLNELKKLNLEHLFLARIALPGYIKGLSKANIKIAFNKNKVDLLLKNASRFFKLVFRINLKRAIRYDVIKWTKDQVDIIL
CP001621.106	locus_tag=MMCAP1_0115 protein=UTP--glucose-1-phosphate uridylyltransferase protein_id=ACU79147.1 location=complement(144469..145341) gbkey=CDS	957.3	744.1	766.3	349.8	358.5	342.9	3	3	642.822	624.854	587.308	634.729	640.482	613.926	MMCAP1_0115	MTIRKAVIPCAGFGTRFLPFTKSQAKEMLPIIDTPTIEYIVKEAIDSGIKEILIVLNDKKSEIMNYFSRNIELERFLYNKDKINELEQIKTKYDADIHYIMQDEPLGLGHAISLCKGFINNESFAVLLGDDLFKCQTPAIKQLMDLYEEKHSTILGTILIDKKDCKKYGICKTESSNDNVYKVCSVVEKPDEQNAPSNVAIAGRYILTPEIFNYLDLQLKGETGEIELTDSILRTIKDVDCYAKVIDGKRYDIGNKLGYLEAFVDFASNRDDTKNEFIKIVKKLNEEETL
CP001621.107	locus_tag=MMCAP1_0116 protein=conserved hypothetical protein protein_id=ACU79124.1 location=complement(145526..145966) gbkey=CDS	110.3	104.2	45.2	101.4	99.9	100.8	3	3	74.0659	87.5014	34.6422	183.995	178.478	180.472	MMCAP1_0116	MQNKSGLILLKEVFINNYSNKIDFLKTVFSDKQINELESITNIKELLTNLKELLDNQILIHQNKIKEYQLELKKTNKKILNKLWLWWLLPIIGMFIFFIIYNTRLQNPYYANQLVDIKVKITDLDIKNIYIDKLLEEINSSVKLKF
CP001621.108	gene=plsY locus_tag=MMCAP1_0117 protein=acyl-phosphate glycerol 3-phosphate acyltransferase protein_id=ACU79832.1 location=146036..146797 gbkey=CDS	105.3	186.7	131.4	68.2	68.2	74.6	3	3	70.7084	156.78	100.708	123.752	121.844	133.563	MMCAP1_0117	MHYLGIIIASVIGYFLGSISWSIIIVKKVGNIDIRTVGSGNPGATNTVRALGKRWGLVVAFLDALKVVFTAISAILLSMIPNDLFSQTSYFIPCIFALIGHCYPIYYKFKGGKAVSCFLGLLFVVNVLYLIIFLIIWFISVAISRKVSVASMFSALIILLIMWIPYLSGVSYFIWEWNGLEKFSFAWKNYILFSLLNSFHYWLSNTWASGILEGNIIILIGGLILAWRHSQNIKRIKNKTEPDTFPKKVKPVR
CP001621.109	locus_tag=MMCAP1_0118 protein=ABC transporter, ATP-binding protein protein_id=ACU79730.1 location=146861..148399 gbkey=CDS	493.2	366.6	394.4	115.3	117.5	113.4	3	3	331.181	307.85	302.276	209.217	209.921	203.03	MMCAP1_0118	MSLIVLENITHQNGEKILYKNSEMRINKGEHVALIGPNGAGKSTLLNIIAQKITPDHGTIEWHPKAKIGYLDQHQEVDPNITSEEYLKDAFKNLFEIEARIHKIYENMAIEYKESDLIKALELQDYLTSHNFDTIDKTIGNLVSGLGINPNNMKKKLSELSGGQRGKILLAKLLLKNDDFILLDEPTNFLDIEQVEWLINFLNNYENAFLMISHDVEFINRVAKIIYAIENQKINRYVGDYNKYLELSALKADQYDKARESQQQQIAKLKDYIARNAARFSTAKSAQSRQKQLDKMDVLDERKKLVKPKMSFKYKRPNSAVVVKSQNLEIGYNFSLTAPLTFELREGQKCIVKGYNGIGKTTFLKTISNQLKPISGWCKLGDGVEVRYFEQVEKFHEYE…
CP001621.11	locus_tag=MMCAP1_0011 protein=ribose/galactose ABC transporter, substrate-binding component protein_id=ACU79650.1 location=complement(15153..16799) gbkey=CDS	182.1	273.5	226.3	513.3	546.9	528.4	3	3	122.279	229.67	173.441	931.407	977.071	946.043	MMCAP1_0011	MKKLLTVLTTFIGISGSVSMVISCKVPTFAEGILGQRVLVVTDGGNIRDKTFNESSWEGVIKYGSQIHSNFDIKNELEARQFNYKSSIGGHTKWDETKHMFINEDYEYAKQNSNNYVETPDHTIDAFRTSYNTAIYKKADALLLAGFGHLGAVDYAADRMKKAGNKTVVFLDAQYKKDNVISVIFNSELAGFNAGWDAIMWANLPKMTSLNSGEFSKEAIDASNSKTDMVLQGSATGNKYISIGMFGGITNKNAVDNYMWGLLAAMHVYNNKFAGKEIELTDNKENKVKYKLQPVYYANLGSKAEVEKLNDVNESSWFSKGFDVGGAKKSGIVDSLIKNQADIIFPVAGPQINDVLESTGHKPYVIGVDTDQVTSVGSSKKGNETRFITSAKKNIVSAS…
CP001621.110	locus_tag=MMCAP1_0119 protein=hydrolase, TatD family protein_id=ACU79633.1 location=complement(148429..149226) gbkey=CDS	657.3	432.2	558.6	811.9	769.2	788.6	3	3	441.374	362.938	428.122	1473.23	1374.22	1411.9	MMCAP1_0119	MNISGLYDTHCHLNDSRFMEIDMTSNEIVIEAKRSGVKYINNVGYDVKSSKTAVFQANLDPNVFAVVGIHPSQIHLYADQAFESIEELANSNKVVGIGEVGLDFFETNKYEKQQILGFEKQIDIAKKLDLPIVVHLRDAVNHFRVYEIAYKIFKEKRVKKAVIHGFRGPLEWALKFIDLGFYISFDAAITHEVELEQVVKNVSLNRLLVETNSPFLPPSPYKKGLSYPKYLPLIVKHIAKIKKVSDSIVAENTKNNAERLFLRSY
CP001621.111	gene=ilvA locus_tag=MMCAP1_0120 protein=threonine ammonia-lyase protein_id=ACU79553.1 location=149422..150648 gbkey=CDS	1964.3	1489.5	1663.7	862	852.5	834	3	3	1319.02	1250.8	1275.09	1564.14	1523.04	1493.19	MMCAP1_0120	MSHPFTVDEIKQIHQEISKIIHYTPLHYADKLSALTGNNIYLKLENLQKTGSFKLRGATNKISKLTDEEKRHGIIAASAGNHAQGVAYAATNLGLKSTIVMPENAPMAKIQATEKYGGKVVLSGRYFDDALAKAIELKEKENLTLIHAFDDIEIIKGQATIAYEIDQQIKNIDYCLVPIGGGGLMSGIATYLKQVNPNIKMIGVEAANVNSYQQAKALNKPVMIDSKPSIADGIAVKKVSDLTFSILNQYVDDVVVVSEEEIAETMLFLMENCKFVTEGSGAVTAAALMFDKLNIKNQNKTIVGLVSGGNIDIAMVGNIINKALIKTNRRLVLSVNIPSDNKELMNIISIINSCGAKIIKIKTNRDIMYLELNEIHTTFIIDLSNPDQQQQIIEKITQA…
CP001621.113	locus_tag=MMCAP1_0122 protein=conserved hypothetical protein protein_id=ACU79152.1 location=152455..153315 gbkey=CDS	26.6	31.1	29.9	74.6	76.8	70.6	3	3	17.8618	26.1161	22.916	135.365	137.208	126.402	MMCAP1_0122	MILSLYVWLQIRKKLKRKVSYQESLDFEYQIASENGYNFDHLDLSGFNKEYKTINTRFGKLKIFKHGTGDTVIVYCHGILSNNRNAIKFLDYCFSRNITLISYDNFGWGESDKFGKCTLGIKEADLLKDVIDFVKKDLKPKKLVIYGESMGGGTVYSFISKYNNKIADKFIVDAGYNSFLDIAIQSGFKKVWYFIYLSYLFLPILFKLSHYPVKRFIKKQDFKNLDNVLHIQSTGDALVDYKHFKKHLKYLKNKHVYSKPIRHCMGIDYLRDEHYKVLDDWIEIKK
CP001621.116	locus_tag=MMCAP1_0125 protein=PTS system, N-acetylglucosamine-specific iibc component protein_id=ACU79053.1 location=156389..158092 gbkey=CDS	187.9	237	223.2	181	168.9	169.4	3	3	126.174	199.019	171.065	328.433	301.75	303.292	MMCAP1_0125	MHFLKTKDKQNKENSFYNNLLNALQRLGKTLMFPIAVLPIAALLARFGALIQDPLANGGLNISEIQKFIGLIIATPGQIVFDNLAIIFAIGISFGLAKDNRGEAALVGGIVWFGMTALLKEGLFPTFIWKNVLTSDKLLIERNGQMVHATQLLYFLKGNSVKYQLDSGVVGGIVVGCLVALIYNKYKEVTLPQALSFFGGRRFIPLLGVLMIIPLGLSFAIIWPWLQFGLIKIGTALSQANGFYKGFAVGTYGFLNRLVYPFGLHHILNTFVWFQLPIEGKLLVDNSTTIINGDIPAFQKGLIGSGLFTTGFFPLFLGGLPGVALALILVSDKDKKRQMTAFYGGAAFVAFITGIDEPLTFNFIFISPILYFLNALFTGIFYMFVTWSQISLGIGFSAG…
CP001621.117	gene=gltX locus_tag=MMCAP1_0126 protein=glutamate--tRNA ligase protein_id=ACU79770.1 location=158225..159676 gbkey=CDS	811.7	503.9	550.8	183.8	173.8	206.9	3	3	545.052	423.147	422.144	333.514	310.504	370.432	MMCAP1_0126	MSFRLRYAPSPTGFLHIGNTRTALMNYLFAKHYNGSFIVRIEDTDLTRNVDGAIESQFENLNWLGIFPDESIFNVGDQKYGKYMQSQKFDRYKQLAEQLVDQNKAYRCFCTSEELEKDYEEQTSKGIIATKYSQKCLFLTQDQIQKNLENKKEYSIRFKVPENKTWTINDIVRGDVSFDSKDLGDFVILKSNGVATYNFAVVIDDYDMQITHVLRGEEHISNTPRQMMIYDAFNWNYPKFGHLTLIVDNTGKKLSKRSGNALFFIEQYKKQGYLSQAIFNYIALLGWSPPGEQEILSQNELIKIFDEKRFSKSPSTFDMVKMKWINSVYMKKLDDDKYLEFVKSFINTNKFDITSKSEAWLNHLLLLYKKELEYAEQINDHLDLFFNKNTLDNNTIDVL…
CP001621.118	locus_tag=MMCAP1_0127 protein=HD domain protein protein_id=ACU79649.1 location=159679..160893 gbkey=CDS	139.4	203.2	214.8	31.8	31.9	24.7	3	3	93.6064	170.636	164.627	57.7026	56.9913	44.2227	MMCAP1_0127	MYLKVIRDNVHGDIYFDDVIYIQLINTYEMQRLRRILQLAGTQLAYPSATHTRFSHCIGTYYILKEFFKNKAFLKISSYEQKLVKIAGLLHDIGHGAFSHTFEKITHKNHEQYTSEIILNKKGNIYPILKKHHINPQDIVDIINGTYKNKIINLLVSSQIDADRFDYLKRDSISCGVDYATLDFKWMIRNAFIIGDKIVFPKKTIYAIESYLLGRYHMYQQVYNHKTSTIFDAMFISWFKRVTDLFNNNYKFKDNRIIELFINVFNNKDIDLDAYLKIDDYLMFDIFKNCSSEKDVILSDLSKRLTDRKLFTIRDEKLINKTTLINKLNKLGLDPTYYLLEANIRPLSMYNPVIKNNKDENIYLYDSNNQQVHELSYYSKLVKFFQKSNSQKNLRKIIF…
CP001621.119	locus_tag=MMCAP1_0128 protein=conserved hypothetical protein protein_id=ACU79572.1 location=160919..161347 gbkey=CDS	1538	1269.3	1328.1	383.5	381.9	422.8	3	3	1032.76	1065.89	1017.88	695.879	682.288	756.978	MMCAP1_0128	MSKVRNLDLVYSYLQSTKTPSSLNEIWKSISKDIISQKKDEISVIADLYGDMVLDNRFALTTDNLWALSSNSSVENIKKQYDDFINTDHKHRYSDSDEELTIDDEMLLDEDYDSDFTQELDDFDEDFDDTDQTYIDDDEYNR
CP001621.12	gene=metG locus_tag=MMCAP1_0012 protein=methionine--tRNA ligase protein_id=ACU79732.1 location=complement(16986..18515) gbkey=CDS	580.3	459.5	499	224.7	216.3	202.5	3	3	389.669	385.863	382.444	407.729	386.433	362.554	MMCAP1_0012	MSKKFYITTPIYYPSGNLHLGHAYTTTLADILNRYKKEQGYETFFLTGSDEHGQKIENKAKEANLTPLEYLNPKVQAFKDLWTKLNINYDKFIRTTDDYHEKAVQKIFTILLEKGYIYKGQYEGIYCVSCEEFLTNEQIDENGLCKISNTKPQLVNEDTYFLKVSQFQEFVQNVLKSDFLIPEYRRNEMLKNFVEPGLKDLSVTRVSFKWGIPITEDQRHIIYVWLDALSNYITALGYLQEDDSLFKKFWQNDDCEILQLAGKEIIRFHSIYWPVMLEALNLKQPTHLLGHGWILNKNTKMSKSLGNVIDPVKIIELYSADALRFYIANDLPTEKDGNFSLELFIESFNAHLANNVGNLISRTHNMISKYFNGYINLSNVNYDQELINLGIKTIDNYVF…
CP001621.120	gene=pyrG locus_tag=MMCAP1_0129 protein=CTP synthase protein_id=ACU79135.1 location=161439..163037 gbkey=CDS	2960.8	2233.8	2232.5	457	468.7	481.3	3	3	1988.16	1875.82	1711.03	829.248	837.362	861.716	MMCAP1_0129	MAKFIFVTGGVVSGLGKGITASSIGALLKASGLKVFMQKFDPYLNVDPGTMSPYQHGEVFVTKDGGETDLDLGHYERFIDEELTKLSSTTSGKIYLSVIQGERKGVNSGKTIQVVPHITDAIKQKVYQAAEQSQADVIISEIGGTVGDIESQPFIEAIRQIRLEQGKENVMFVHVVLLLWLAASKEYKTKPIQNSVKAMASLGIQPDVIVCRSDSSSPKDIKEKISLFCNVPITNIIDAIDQDSIYRVPLALAKQNIQDIIIEQLQLKAKNIDLSLWKQFNKKIDSSTEEIEISFVGKYIELQDAYLSVLESLKIAGWEFNKKIKIRWVQADKLDESNYKEILKNSQGILVPGGFGKRGIEGMMLASRYARENDIPYLGICLGMQIATISIARDLLNWT…
CP001621.121	locus_tag=MMCAP1_0130 protein=conserved hypothetical protein protein_id=ACU79218.1 location=163168..164142 gbkey=CDS	146.1	164.4	132.4	82.9	87.3	78.5	3	3	98.1054	138.054	101.474	150.426	155.967	140.546	MMCAP1_0130	MRKFISLILFCSVISISFFISLLFNNANNYKFYLNQKEKEEKKEEYPYHKYNGSDKSEITEIGYYKNESGVIIIRPIPWYVKKVTETLPEKIQSLRSAFAYRYDHHKEVTGFEKWDTKNITDMSFMFFNNETINVDLSNWKTEKVTNMQGMFKGAIKFNNADKPLSWTTNEVTNMDSMFDGAKSFKQNLKDWNVDKVDKNRNFSRASGISNDKNKLPKWKKDEEQDPIEKKIEKKEPEVIIHPSPTPKPKIEVPLTKIITPISKSSSTPNSKLNKENLKPNITTPKQETKKLSTPAIVGIVVGSQVVLTSLAAGVPYLIKRFKK
CP001621.122	gene=fba locus_tag=MMCAP1_0131 protein=fructose-1,6-bisphosphate aldolase, class II protein_id=ACU79297.1 location=164301..165194 gbkey=CDS	16012.8	12125.8	13466.3	1511.7	1578.2	1459.7	3	3	10752.5	10182.6	10320.8	2743.05	2819.55	2613.44	MMCAP1_0131	MPKLYHKKLVNAKQMVIDAHRHRYAIGHFNINNLEWTKAILEAAEASKTPVIIATSEGAIKYMGGVNTVVGMVNGLLDYLNITVPVALHLDHGQSLEMAKKCILAGYSSVMFDGSHFPYAENLEMTKELIKFAEEYEVSVEAEIGSIGGEEDGVIGQGELGDPLQAEEISKTGITMLAAGIGNIHGKYPSWWQSLSFDTLERLQKACKMPMVLHGGSGIPQEQVKKAISMGIAKINVNTELQLAFRDATRKYVEERKDLDDAKKGFDPRKLLKPGYDALKTTFLELTNWFGCQGKAK
CP001621.123	locus_tag=MMCAP1_0132 protein=AAA family ATPase protein_id=ACU79560.1 location=165343..166404 gbkey=CDS	350.9	297.1	333.8	65.4	66.3	61.4	3	3	235.628	249.488	255.831	118.671	118.449	109.93	MMCAP1_0132	MKKANVLNLIRYHIEENDISFRKEARIIAEEFYKMGDDELAEYVLFMLRDANHFVPQIDQEYDIQIPFTQKIELERNSEPLPLPQVISEEIKGVINAISKNRKINKFLFQGFPGTGKTETVKQIARILNRNLFMVDFNNLIDSHLGQSSKNIAELFQKINQTPNPKKIIICFDEIDALALDRTNKTDLREMGRVTTAVFQGLDKLDTDIIVFATTNLFKHFDKALIRRFDLVIDFNRYTKKDMLDIAEIILKHYIKKVDNIKSELRLFRKIISLSEELIYPGDLKNIIKSSIYLSDYEDQYDYLKRIYKKITDDKLDIRQLNENNFTVREIEILKGLSKSSVALKVKELNSNE
CP001621.124	locus_tag=MMCAP1_0133 protein=conserved hypothetical protein protein_id=ACU79259.1 location=166397..168670 gbkey=CDS	150.2	131.1	140.7	16.3	12.8	11.3	3	3	100.859	110.091	107.835	29.5771	22.868	20.2314	MMCAP1_0133	MNNLIVLKGKFEPGKNTKKPNSPQIPKTSIIKLEDCYRILDQLIKASSFWKEQKIDINPIINVKYKRIISKSNRVSYLLLKSLQKNNEHIIGSSFLDELVEKKIVKKQVITYCLTQKDLQEAIKRLDTITNILKKTHFKRIDNNLINLIANEQYLPIKKEIQKYEFLSRTAFISTLVDLNYIEEIFIKTTHIDNNVDSVVTLYDTGIKAIDLLNKLDINVNMSDFIDDYTLFLDRNQYNELKTKAPFLISMSVDDLTKFIIDDKQEEITKNDIISIPDPTNEPIVGVIDTMFCKDVYFSKWVDFRKEVSDDILLDSKDYQHGTQVSSIIVDGPSFNKKLEDGCGRFRVRHFGVMAHSSGNVFSLFKKIKSIVINNLDIKVWNLSLGSIREVSSNYISLL…
CP001621.127	locus_tag=MMCAP1_0136 protein=glycerophosphodiester phosphodiesterase protein_id=ACU79205.1 location=170860..171564 gbkey=CDS	244.9	258.2	243.2	48.4	51.7	59.9	3	3	164.449	216.822	186.393	87.8241	92.3653	107.245	MMCAP1_0136	MILVAHRGFRGLYGENREYDFKNALTICKAVEFDIRLTKDDKIIIFHDHNFKRIGNLNRGVKTLTYDEITKIPYFVENPLATPILFEVFMDRYFDQYEMINVEIKPDHYTEDELDIIFNAIKKYCNKGVEIIVSSFSPVVLKEILKRKGNYYKSGYLFEKMSQFDVELGKKFDFLHPPITLLKKQSNCELFKKLNIPLNVWTFKKMSDVEILHKMYKDLINGYISDYPDLYPKN
CP001621.128	gene=rpmE locus_tag=MMCAP1_0137 protein=ribosomal protein L31 protein_id=ACU79691.1 location=171724..172002 gbkey=CDS	9506.7	8347.2	10045.9	2512.3	2756.1	2645	3	3	6383.7	7009.52	7699.38	4558.69	4923.94	4735.59	MMCAP1_0137	MPKIDIQPKYFDQAKFICTTCASEWVCGTSKSEEVRVDVCSNCHPFYTGAQTYTNVAGRVEQFKSKFAKRDTIKAQAEKQSQAQKAKNKENK
CP001621.129	locus_tag=MMCAP1_0138 protein=conserved hypothetical protein protein_id=ACU79841.1 location=172075..173973 gbkey=CDS	140.9	109.3	118.7	735.1	736.5	701.1	3	3	94.6136	91.7841	90.9741	1333.87	1315.8	1255.24	MMCAP1_0138	MSYKIKELTFRSKNPSLNKVDFIADDGQIVDIVIDNKKEMDFFIKVLLGKKKNSSGRFQIDDFDIINRAYTKKHVEFIKRDTWFQRIIPSKWVLVLSLLFDQNFLKTASNKYLEKKYEYLSLVASKGEANDKKLRQNIDNLISKHIISKTREEQKALNESINTQKKHNQEKFLAIAEKWPIQIRLLSKAVENLKTEIKTATLMLMFQQTLWDNVYALDELRDNCSCEYNAKHSSNKKLKKSWKKFAYQQTYYAVHKQLRIISTKIADLRLSIFRQQKRLKQFEKQLDFEFKKYLRSLLSSTTNKTEKKDINNNWEQTKKYFTDWKNANKNTLNDLEKQQIELHIEPIRKTTQQLGETINFLIHQYHERVLSDELEYIDKRRFLKQKKEKKKEIKSVFKQ…
CP001621.13	locus_tag=MMCAP1_0013 protein=mycoides cluster lipoprotein, LppA/P72 family protein_id=ACU79835.1 location=18716..20302 gbkey=CDS	145	177.6	130	188.4	186	181.4	3	3	97.3668	149.139	99.6346	341.861	332.301	324.777	MMCAP1_0013	MKKATKLLLFILPISSISVLGVVSCTTTSSNAKQPDKKPEKPNEKDPITPPKPDDKKPNNNDNNSNDSNNNSNPNNKPDSTKPEENQPKKPNEQPQGDDSNNNVQPHNDQPADQPEIHKVDFSDVDKLPEEISLEHFTNYKNKSLESAWSDLQKDSTVFSHILFKNLKGYRISFENISGVKFDHSKGVIDNVKIKFTKEGESKTRVFVLTGLKRTDSVEPKEPKNNKDNYIKPKSVDNRLSGLFPSLLAYMLLFVENNKKYEEIQWTKNSINFDQLKNKNTNFFDESFVGFNVGTKELLFEYNENDRTKYEDKIINAKYDDINGELGLEVEIKNREESNLSEPSITKVFNFKGFRKANFNNQNKNVLSLSLLPSDLKDLITTKGSLKSDVDKAIKSKDF…
CP001621.130	locus_tag=MMCAP1_0139 protein=DHH family protein protein_id=ACU79334.1 location=173983..174933 gbkey=CDS	343.7	325.3	318.8	103.4	116.5	102.2	3	3	230.793	273.169	244.335	187.624	208.134	182.978	MMCAP1_0139	MLDQKKSQLLLDKIKQYQNIIITKHKQPDWDAQGSAIGLANIINDNFKNKTIYVVGSRISDDDSFFIDETNLSDEFVKNSLIITVDTATKKRVDFNRFDLSCDSFKIDHHINVEDYCKNDLIDDSSISNTQVISLWALENDLFISPTAAYNLYLGLLTDSNRFLYDKTNQTTFYVASKLLEAGANLKKANDFLYVSDLKLRQWVMYSFSKMKLTNTGIAYIVLLDEDLKDWDLSYEETKLALSAMSGIKEIKIWFTIIQVEDILKVSLRSRDFSIDKIANKYNGGGHRLASGAEISSLDQINDLINDLEQLIKGEQ
CP001621.131	gene=tdk locus_tag=MMCAP1_0140 protein=thymidine kinase protein_id=ACU79421.1 location=174935..175564 gbkey=CDS	1186.8	1006.1	1169.6	269	285	254.5	3	3	796.93	844.867	896.405	488.113	509.17	455.655	MMCAP1_0140	MTELDINEIEAYNSNKMGWIELITGCMFAGKTEEFIRRLRVLSYAKKRVLAFKPSIDNRYSVENIISHSGSKLDSYLVHSSDEIKQIIEKENQIQQVDVIGIDEVQFFDEQVVELIEQLANQGIIVIVNGLDKDFRCLPFKNVDKLLVTAEFVTKLRARCHLCGNFANRSQRIVNGQPALWDSPLILVDGKESYEARCRNCFIAPKKEV
CP001621.132	gene=prfA locus_tag=MMCAP1_0141 protein=peptide chain release factor 1 protein_id=ACU79521.1 location=175567..176661 gbkey=CDS	1914.1	1439.8	1633.2	260.7	248.7	230.2	3	3	1285.31	1209.06	1251.72	473.052	444.318	412.148	MMCAP1_0141	MNAKTYEALETMQKRLLQILKDLEDENILKDIKKFTELNKEKSNLEEVVEKFVEYKQAVEHIKDAKVILENEKDQELIELAKIELDENNDKVEHLQQVIEEMLLPKDPNDDKNVIVEIRGAAGGDEANIFAGDLLRMYKLYAETQNWKINILEASVGEAGGYSQVVFMIKGDRVYSKLKFESGAHRVQRVPKTEAKGRIQTSTATVAVLPEMSEVEIEIRSNDLRIDTYRASGAGGQHVNTTDSAVRITHLPTGIVVTSQDGRSQHDNKDIAMTMLRAKVYEAEVEKQQAQADATRKNAVGTGARSEKIRTYNYPQNRVTDHRVGLTLNKLDQVMEGNIDEFIIALINEEQRQKVAEQLEKNNE
CP001621.133	gene=prmC locus_tag=MMCAP1_0142 protein=protein-(glutamine-N5) methyltransferase, release factor-specific protein_id=ACU79624.1 location=176654..177502 gbkey=CDS	155.1	123.2	140.3	28.3	69.8	39.9	3	3	104.149	103.457	107.529	51.3517	124.702	71.4367	MMCAP1_0142	MNNTIFNVLNKIKNTNISLNKADVYHILEHIINKDYQWIISNLDYKLTKKQIYKIDQILDLLKQNYPLAYILKSKYFYSNNFFINKDVLIPRNESELIIDHASEFVKNNNDLLIVDLCTGSGCLGISCALLNDQNKVILTDISYKALKVANKNIKKFNLTNTSCLNGNFIDVLIKNNLKANLIICNPPYIDINDQNIDKNVIDFEPSIALFAPNKGLYFYEILIKNIDKILDTNKNFLIVLEFGWLQKDSIEQLLINNCLKYKWEFKKDYNDYWRNLIIKNF
CP001621.134	locus_tag=MMCAP1_0143 protein=putative membrane protein protein_id=ACU79798.1 location=177511..178983 gbkey=CDS	10	16	12.7	25.1	23.9	23.6	3	3	6.71495	13.4359	9.73354	45.5451	42.6988	42.2533	MMCAP1_0143	MYKNKNFKIKIINNKFSMRIKDIDPKIEQKNFSIYLKAILGLVVFLITLLPFYAYLHLIFKHESLSFYFANYSIISKYVDLPSKSQIWGLAISALVFMAIVITMFISFKALVNISNNKRYKQAIIALIIIFGILTILFQGISQYFYGYFQDFFNYQVISGLDNKISDFKKITTQFIEFEKNTSSIYNWIDVNNIWWIIFVQIFLMFVTSISLQNITFFEYEKNSEDKYINYFVQKNKVIYQNRIKLYVNNLFSFTDKTLSNWLIILVLMICFPILIYIVAISTRGSEKSLIYWTHQLPNLLKDYQNWNTIFDQYKNQLNLTKSSPLLILSSPIIFLGITLSTVLFLLTISIRGQKSSQLVLRTKFILLSILISLLILSIFISQLELHKLLVAWNTSNNE…
CP001621.135	locus_tag=MMCAP1_0144 protein=conserved hypothetical protein protein_id=ACU79095.1 location=178992..179492 gbkey=CDS	361.7	299.5	295.9	319.8	443.3	555.7	3	3	242.88	251.503	226.784	580.292	791.983	994.921	MMCAP1_0144	MLTDIKINKAIELLKNNQIIILPTDTIYGLSAIYSLENQIRVNQVKNADITKPLIVLISNLDQLNDLEITDLTDKDYLLNDEPTTVIFKTKSSSIAIRLVKREDIKQIINKTGPIISTSVNLHNFKPLIKENDLINFNKNIELFFDTQLNNKPSKIYSSIIKKYLR
CP001621.136	locus_tag=MMCAP1_0145 protein=conserved hypothetical protein protein_id=ACU79693.1 location=179607..180521 gbkey=CDS	3347.1	2009.3	2497.9	991.7	958.9	924.4	3	3	2247.56	1687.3	1914.44	1799.49	1713.13	1655.04	MMCAP1_0145	MNSHSLVFNYRDNKHFLQEMHTIIKKRGPKTFEEWMVNNNFDSAYIPVTIVNERNGVLAVSGFIKSKAIINKTVLNTILLTNTFTKAKESNPLMVNELIQGVVKKYENISDFIYTFSNVENDDVLIRNGFKKIKEYTYFMQWDPNKEAKLSVLKRLDLDTNQADFEFVKDELFHSSKNNSLFYIREDGALPIYSLLKYYRNNVFYISNLDAIVIFSINNKTFQLIGLYSKNEIDVLELLDAIVPKGISLIEFYFVPNIKSKFVVKELRKVMAADCQHRSFLYVRQSTTNLEASKFVVPLLNRLK
CP001621.137	locus_tag=MMCAP1_0146 protein=conserved hypothetical protein protein_id=ACU79155.1 location=180750..181457 gbkey=CDS	NaN	2.7	NaN	65.2	62.5	72.3	1	3	0	2.26731	0	118.308	111.66	129.445	MMCAP1_0146	MKRKIIKKNLALVKKKRLFLDFLKNNQLEDIYLKNTDFNKKSNILLNNFIIILKINNLNYKNFWANISFINFCIYYLYHKFYKSLSEQKLNQINLTIKKIATNRKYNSLDINYEKQLIEIAKQYDIKFSTDFINTYFNNHQIYHYISNSFSLMFENDKKMLAYSYCYWLILFIYIKKYLSLQLNYKYSYSLFNLEMICNENYIKNIKQLTPIFFNLLIMKNNKWISKLDIKRKKK
CP001621.138	locus_tag=MMCAP1_0147 protein=cardiolipin synthetase protein_id=ACU79488.1 location=181457..182986 gbkey=CDS	15.2	21.3	21.4	46.5	43	46.1	3	3	10.2067	17.8866	16.4014	84.3764	76.8222	82.5371	MMCAP1_0147	MKKLIITVLSLIFMFGLTIFGLLLLNIYFFNWPLIGFGIFHLLAIIWAFIVLADKKRRFETRIRWFCFIVCIPIIGVLSYLFFGRSYKYKITKNYKFLEIQNKHSENELEQIDQILTNQIPQFKRAFKTASISQTNNIFLNTKVEFLENGNQLFLNLFKDIKNAKHYILLNFYIFKDGKLLDELTNLLIKKLKENVKVYIIYDFAGSYTLFEEAKIKLLEYGCQIVCYAPIRFPFIKWTANYRDHRKDIIIDNKIGYIGGINIGDEYINLDNKFGYWNDCSLKITGNAVSEIQRIFISDYDFYKPSFKKNSIKQDLDLDNVYSVKCKDQLVQIVSSGPNHEEPLHLSIFINLINSAQKRIWISTPYFIPPQEIRTALINAANSKLDVRILIPGLTDKAF…
CP001621.139	gene=rpsL locus_tag=MMCAP1_0148 protein=ribosomal protein S12 protein_id=ACU79360.1 location=183110..183529 gbkey=CDS	20579.2	16947.2	17558.7	1601	1766.3	1788.2	3	3	13818.8	14231.3	13457.3	2905.09	3155.6	3201.58	MMCAP1_0148	MPTINQLVKVNRKAKTWKTKAPALNRGINTLIKKVTKIASPQKRGVCTRVATMTPKKPNSALRKYARVRLTNGMEVNAYIPGEGHNLQEHSVVLIRGGRVKDLPGVRYHVIRGTLDTQGVAKRSQGRSLYGVKRPKVKK
CP001621.14	locus_tag=MMCAP1_0014 protein=mycoides cluster lipoprotein, LppA/P72 family protein_id=ACU79101.1 location=20317..21831 gbkey=CDS	163.9	141.4	210	238.7	249.1	223	3	3	110.058	118.74	160.948	433.132	445.033	399.257	MMCAP1_0014	MKKATKLLLLSILPISSIIFLSVVSCSTTSSNAKQPDKKPEKPNENTPMTPRIPDESKQPNDKSQGDDPNNNVQPHNDQPVDQPNINKDEFLDLDKLPKEISFERFSFYTSKDAKTALSHLWMDGSVIKLIFQSTYRNIFERYDINLELDGNEKEDVKKGLIDKVKVKFTNKKDKKSKIIKFTFTGFKVVQKTPDKEDKNSKKNYIKKKEKIDSKLTGLYPSLVAYMIMYTQEPKNYKNLIQKDSINFEELENNNPNLFADPEINLNVAALKDLLLEYNRELGKLYKDKIIAVSYDDVNGKLGLKLLIENIEENNTIASKYSETLEFSFEGFRKIDLKNPNKNVLSLLLPQNSFKDMIKNNVFKKKIEALKSEKQKEDKLLINEEYARQLIFKNLLVQI…
CP001621.140	gene=rpsG locus_tag=MMCAP1_0149 protein=ribosomal protein S7 protein_id=ACU79727.1 location=183616..184083 gbkey=CDS	12884.8	12111.7	12369	3922.5	3956.2	3903.4	3	3	8652.08	10170.7	9479.85	7117.56	7068	6988.62	MMCAP1_0149	MRKNRAEKRDVLADPIYNSKLVTRAINKIMLDGKRGIAQSIIYDAFNIIKEKTNKEPIEVFNKAIENIKPHLELKVRRIGGANYQVPVEVSAERQITLALRWLINYARLRNEKVMTIKLANEIIDASNNIGGSVKKREDTHKMAEANKAFAHYRW
CP001621.141	gene=fusA locus_tag=MMCAP1_0150 protein=translation elongation factor G protein_id=ACU79128.1 location=184108..186177 gbkey=CDS	7827.1	6191.9	7070.1	1246	1297.4	1327	3	3	5255.86	5199.61	5418.67	2260.93	2317.89	2375.85	MMCAP1_0150	MAREYSLLNTRNIGIMAHIDAGKTTTTERILFHTGKIHKIGETHEGASQMDWMAQEQERGITITSAATTAFWKNTRFNIIDTPGHVDFTVEVERSLRVLDGAVAVLDGQSGVEPQTETVWRQATNYKVPRIVFVNKMDKTGADFIYSVKTIGDRLGAKAAPIQLPIGAEENFTGIIDLVEMKAYEFDGKPEENYKEIEIPTNLLEQAKELRAHLVEVAVEYDEELLMKFLDGGEISISELKSAIRKGVINADFFPVLAGSAFKNKGVKLLLDAVVDYLPSPLDIPSIKGILPTGEEVERHADDTEPFSALAFKVMTDPFVGKLTFFRVYSGILTKGSYVLNSTKQQKERVGRILQMHANNRTEIEEVYSGDIAAAVGLKNTTTGDTLCDEKGEIILESM…
CP001621.142	gene=tuf locus_tag=MMCAP1_0151 protein=translation elongation factor Tu protein_id=ACU79447.1 location=186309..187496 gbkey=CDS	34453.8	28185.7	27516	8978.6	8947.2	8507.4	3	3	23135.6	23668.8	21088.8	16292.1	15984.7	15231.6	MMCAP1_0151	MAKEQFDRSLPHVNIGTIGHVDHGKTTLTAAITKVLSEQGNAEFKDYANIDNAPEERERGITINTAHVEYKTANRHYAHVDCPGHADYVKNMITGAAQMDGAILVVAATDGPMPQTREHILLSRQVGVPKIVVFLNKCDMVEDDEMIDLVEMEIRDLLTEYDFDGEGAPVIRGSALGALNGDSKWTGAINELMAAVDEYIPTPQRDADKTFLMPVEDVFTITGRGTVATGRVERGTVKVNEEVEIIGLKEEPTKTVVTGLEMFRKLLDFAVAGDNVGALLRGVDRHSVERGQVLAKPGTIKPHTVLKASVYALTQEEGGRHKPFFNKYRPQFYFRTTDVTGEVTLPEGTDMVMPGDNVEMEIQLIKPVAVEEGTKFSIREGGRTIGAGTVISIEK
CP001621.143	locus_tag=MMCAP1_0152 protein=PTS system glucose-specific eiic ba component protein_id=ACU79772.1 location=187629..189494 gbkey=CDS	309	525.1	465.5	598.6	567	610.1	3	3	207.492	440.95	356.769	1086.19	1012.98	1092.32	MMCAP1_0152	MKKLLDFRKAKESNLHEFFSKFAKSILTFVALLPAAGLTIILGKIIGPLGLGQIKASAKVFNQIGGVIETVGWAAFSHMGLLFAVAIGGTWSKNRYGGSFAAAFSYFILLAVGSSMFITRTTEAGEIQFLNYILGRWEKHELFFSSQEGVMSIRYDAIGGIIMGFVGATIYNKYYNFNKLPQALSFFNGARFVPFMVIIIVLPISVGIGLIWPLFQTVINHLGNFFAKEQKLKFLAPFLYGTSERLLLPFGLHHMITIPMNYSQLGGSVDFTSASQFSNTTNENAKVIAEFFNSLENNKEALKPQGQEKIWLSWITALGNVKSGWADYAAKHNNVNGLTMQQAYEIVLDSVVPVRFKVGQMITSSGSLVGAGLGMAFAIPKEKRAKYSSIYFSGLAACL…
CP001621.144	locus_tag=MMCAP1_0153 protein=glycosyl hydrolase, family 31 protein_id=ACU79565.1 location=189478..191748 gbkey=CDS	622.5	518.2	566.5	168.5	175.7	165.8	3	3	418.006	435.156	434.177	305.751	313.899	296.847	MMCAP1_0153	MPKPNNITSEMLEYSFPIKQRIFDPKNEYWITTKVSDLWTNDNSLFIEITFSNLQKATFQIKLFESNIINLKLSQRSINRVFNEHLNSNLKSEKISYIKTDKEIIIDLKNNEKLIFNINPFVLKIIDSNNQIKTRTTLRTGYQFFEGFINPNLGIEIDQNKNQRFFMSFDIDNDEKFYGLGEKFRPLVKNGVESVIWNTDNSCVTNNDLAYNGLPLLYSTNNWGFLINTSCKTTFEIGSPTTDILSFKVDQDYLDLYLFSNNNLKELVSSYTLLTNRISKVPDIGYGVWLNRLYYHNYEELFEAINKVKELNYPLDVITLDPKWLKNRYTKSCNFEYNTDAFGDFKKLFDDVKANGLEMCFWINPYIQNDGLENSKFLFENDLLVKSKNGSYAHPWTGT…
CP001621.145	locus_tag=MMCAP1_0154 protein=leucyl aminopeptidase protein_id=ACU79416.1 location=191901..193256 gbkey=CDS	3578.7	4693.6	3585	1496.8	1586.8	1581.4	3	3	2403.08	3941.42	2747.62	2716.01	2834.92	2831.33	MMCAP1_0154	MIKFNDKKEELTLVCLTEVNNKPYVSDADLSTTFISEDKTIYMVIKKDHKCLKTKIRNAFKKFVSTNKFNINVDVDSFLVFFDMCGCKKDAIEGIYESIAFETFDKVSYKKDTKPNEVVYNLITSEDVKELEQKEAIKMEFVNFARMLQDTPPNIATSEYLAEKVVQKAKEIEGLKVTVLNKKEATKLGMNLFLAVNAGSPYEPQAVVLEYVGDENEPKKALVGKGITFDSGGYNLKPSSAMEGMKFDMSGAAIMLSTVMALAKMKAKVNVVGIGMFTDNRIGSTATLPQSVIKSMNGLTVEIDNTDAEGRLVLADGITYVIREKQATEIWEASTLTGAMVIALGSFATGVFTNCDKRWELISQASHKTSEKVWRMPIFDEHLEKVKADSVNADLTNAA…
CP001621.146	gene=trmB locus_tag=MMCAP1_0156 protein=tRNA (guanine-N(7)-)-methyltransferase protein_id=ACU79204.1 location=complement(195822..196487) gbkey=CDS	496.8	412.7	429.8	237.3	218.7	192.2	3	3	333.599	346.563	329.407	430.592	390.721	344.113	MMCAP1_0156	MRLRKKNWTDDFLNQHSFYLINYDNKKIDLKQIFLNNNPTCLEIGCGKGQFITTLALKNLNTNYIGMEKSSTITGVALKKSLKEFEHQLKEMTNLKYFNNFAEDLSQMFSSDSFNKIYLNFSDPWPKARHYKKRLTYVKFLDIYSDILIKNGYLEFKTDNDSLYNFTIEQLNLTNKWEVVLNTTDLYNNTELLKDNIATEYETKFHLANKNIYKIVIKNLK
CP001621.147	gene=mgtE locus_tag=MMCAP1_0157 protein=magnesium transporter protein_id=ACU79055.1 location=complement(196489..197892) gbkey=CDS	152.8	259.8	216.8	90.6	106.2	92.6	3	3	102.604	218.166	166.16	164.398	189.733	165.79	MMCAP1_0157	MVDLENKEQEILELYKNKEFDKCIEIIKKLRYADVGEIFNYLDEQIAFNLYKKLEINKASEIFNYLSFDLKEYILTNLSQTKIKQLINDLYTDDIINAVENMPVEVVKKVFNAASKEQKKEIASILKYDIDTAGSIMSVNFLSVKQTTTVSKTIKEIQKNHDDYDEIDDVFVVNKLNQLVGSIEVKDLILNDMNTKVENIMNTKVISINSNQSQEDASNALKKYDISTLAVVDNNNILVGIITSDDIIDVLIEETNEDMQKYTGIRTNETNYFDTSIFKMFISRIWSLVLMLGLTIITNTLLLVFFKNYNWSPNTQSKEELLFMLIPLVVILSTVIICCANQTLVMIRRAISLEEINKKSLKTIVLKELVVSLMIAFVLIVINILRMILIYAVQYNANL…
CP001621.148	locus_tag=MMCAP1_0159 protein=putative liporotein protein_id=ACU79796.1 location=198572..200701 gbkey=CDS	17.5	15.3	16.4	6.7	5.4	1.8	3	3	11.7512	12.8481	12.5693	12.1575	9.64743	3.22271	MMCAP1_0159	MIKKYNKKQIILSSLVLGSLIGISAITTSCSLSSNLKNGEIPLAKNYKKLNNNSNLLVNNISDIKINDSLDLSNYSKTSLVKLENFYPNQHIEEFKENNFNEEKIKEIIFDHNIASNYYSHPKFKLEKKYLTLDNENKTEKLKLIDSKTNQEIQDVKWYQRLRFPTDKLLKADQDDNDSLVKLKADGTISAKQYKKSSDAQVVEIWAEYKGNLYKSVVTILPIVEVNILKAKQEAKKIVEQQGWKDLHVLEQITKAYDWMTKEVKFDYNVANSYDNQTAYSALVNKKTVCTGYAKGFQMLMDELGILSTLITSDVSPRDLSGVKHVWNLVEIDGEWYHLDATSDRIEGSHQKQEYRFFLLHDDDFTKNDVFLRNTREFGQRFRNLKLTNFVKNKEDIDV…
CP001621.15	locus_tag=MMCAP1_0015 protein=mycoides cluster lipoprotein, LppA/P72 family protein_id=ACU79699.1 location=21864..23393 gbkey=CDS	143.7	149.4	142.7	261	256.7	267.4	3	3	96.4938	125.458	109.368	473.597	458.61	478.751	MMCAP1_0015	MKKAIKLLLSILPISSISVLGVVSCSTTNSSEKQPEKPNESTPKTPPKPDESKQPDNNNTNPGDSNNGSNKPETKPDPSEKPQNDKPSDYPEIHKVDFSDVDRLSKDISFDNFVFYKQKDLITAWNELITNQEKSFKEVIFSKNVDILNKYKISFESNFSDVKFDQEKGVIENVKIKFTKDKESKILMFNFTGFKKVASESIDKINNKENYIKAKTTIDRRISGLFPSLLAYMLLFAEDSKKYEDLQSNNNAINFDDLKNKNPDLFDNNFVGFSAGTKELLFDYNDKDKTKYKDKIIAARYDDITGELGVEVEITNREESTLTEPRITKKFNFKGFRSVDFKDQNNNVLSLTLLPKDLKEIANTKSLKSFIDTFLKAKHFNKSLKILEDESIKNFLFKK…
CP001621.151	gene=alaS locus_tag=MMCAP1_0163 protein=alanine--tRNA ligase protein_id=ACU79213.1 location=complement(203687..206377) gbkey=CDS	2093.7	1610.9	1735.2	303.9	298	318.2	3	3	1405.91	1352.74	1329.89	551.441	532.395	569.703	MMCAP1_0163	MKKLSTNQIRKIWLDFFISKNHYFLETVSLIPVDDPSLLWINSGVATLKPYFDGRKTPPSPRLTNSQKAIRTNDIENVGVTARHHTMFEMLGNFSIGDYFKKEAIELAWELLTDKNYFDIDKDKLYITVFNEDTEAYNIWKDVIKIDEDHIFRLSRKTNFWDVGQGPCGPNTEIFYDRGEIWDPNKIGPRLISDDIENDRYIEVWNIVFSQFNNDGNDNYTELPRKNIDTGAGLERFASIFQNTPTNFETDIFYPTIKKVEQLTNDQFKYSIDNYFNPNKKQTRINTAFKVIADHIRATVFAISDGVFPGNKDRGYIIRRLIRRSCVFGKELGIKQAFLYKLVDSVIESMKEFYPYLIDKKTLVEQTIKDEEEKFLKTLSKGYDLLENIIKTKNTVSDK…
CP001621.152	locus_tag=MMCAP1_0164 protein=conserved hypothetical protein protein_id=ACU79831.1 location=complement(206451..206945) gbkey=CDS	5.3	8.9	6.7	35.2	18.5	28.2	3	3	3.55892	7.47373	5.13501	63.8721	33.0514	50.4891	MMCAP1_0164	MKKSKVFKELKDIDKFTKEQHEKQVNKSISQVYDSDDFKMNFYDYQQAKKLRLIGWLIVFLIFIIGSLIGVLVGYLTLNVSSLDNWKGINYFNVLYTTILFFIGFIIGVIKNRQATKFFNDRRRRYQKTLELSEAKLIRLKKIFYLSGLLMLVLTIILFLVFKI
CP001621.153	locus_tag=MMCAP1_0165 protein=oligopeptide ABC transporter, permease component protein_id=ACU79661.1 location=207163..208407 gbkey=CDS	5.9	10	10.5	72.9	68.1	70.9	3	3	3.96182	8.39745	8.04741	132.28	121.665	126.939	MMCAP1_0165	MKSTLKTKQEVLNLNSELLLDDFSLLNETNQQHKVSKWTTFKYWYYDTSANIYKYFLRHPLYGYSFKRILYGLITLLLSIIILYVVIRLITPDTKYLPPDIEKTGLSRAQQDKLLEDRMKRFGVYGPLIPQILTYLKNITPFIPKQIVLGSEVTILQNGNAIIDSSKLITETRWVYLGVTTATTIAEEGSDALSIFLKAMPYSFAIGSVSVLISYALAILIGVRAAKKKGKLFDNVFNGISALLLAIPSIVIIIGTFIFSVAVLGNSGIYNTGSFATRFWPIFAIVVINLPGIATFVRRYIVDEMTVDYAKFALAKGTSSNKTYYVHIFRNAGVRIIRSIPSEIILTVFGSSMIVETQWAIPGMGRLIKESAGGNDFFVFLGFTVLSSFVSIFAKLLAD…
CP001621.154	locus_tag=MMCAP1_0166 protein=oligopeptide ABC transporter, permease component I protein_id=ACU79532.1 location=208423..209433 gbkey=CDS	77.5	122.1	122.3	70.6	73.4	77.5	3	3	52.0409	102.533	93.7332	128.107	131.134	138.755	MMCAP1_0166	MKTKQLEQPDFSALLDSEREAFFKRHGLDIYQIDHSLFELVGSQAQTSETIITKPYSYWKAVGKILITSKVFIICSIILLALLLTSIIVPYGKEAIPLKTPGVTQEHPSAQHWFGLGRNGEDYWIEIWLGLRSSLSFAFVMTFLQLSIGIIMGLIWGYYRKLDILFYQLTSLILVIPQLILIIVIMSVFGIGYWPMILGIVIQAWIGPAFSIRILVLSIRDADYNIASITLGTRSDKIIRKNVLPKILPVLIQVSTFSIPTAIAIESTLAYFDRGFVDGKVNTSLGKILQSIMQSSEWQVYPHLIVLPILFICIISTLFFLVLKVFADSLDPKNHR
CP001621.155	locus_tag=MMCAP1_0167 protein=oligopeptide ABC transporter, ATP-binding component protein_id=ACU79395.1 location=209447..211147 gbkey=CDS	831.3	1019.7	902.1	501.9	518.5	531.7	3	3	558.214	856.287	691.388	910.721	926.332	951.952	MMCAP1_0167	MKNVILSIKDLVVKFRVRSKVLTSIRNISFDIYDGETVAIVGESGSGKSVLTKTLTNMLESNGYIANGSIMYYPNKATRENESAVFKKDTDLVEFHKNSLESESRKGIKKYNNKKIKDALLTIKELEESTIESLNLKIDELQQKADLLKKYEFTNSTKKLVKRNEYLEQIKQLKEQIEWKKDPKKLDFEIQQLEKTIQTAKKEIYNFKTVNIYKKFRYFQIINLINKVNNNQLEDINKLEPHIKWLDEIEYKNNFESLALEILYDIRSNQTKKLDQEKLETLKELWDFIKRFNFWIKRSTDKNLQHLRGGTIATIFQDPMTSLNPLLSVGYQISEVLRNHSKLNRAEAKVEAINLMKRVGIPNAEKRYKDLPGKYSGGMRQRVVIAIALACRPKVLICD…
CP001621.156	locus_tag=MMCAP1_0168 protein=ABC transporter, ATP-binding protein, putative protein_id=ACU79324.1 location=211149..213017 gbkey=CDS	981.5	1133.3	1172.2	709.7	698.2	687.9	3	3	659.072	951.682	898.398	1287.78	1247.38	1231.61	MMCAP1_0168	MIKKKNEAILKVRDLLIEFGNGRNKLKAVKGVTFDVYKGETFGLVGESGSGKTTIGRAIIGIQPISDGAIYFENKLLRGKSPDVYKINQKIARHLYIMQQNQLTTSLSLNDYSNEFKRVYYKYVQSKFFDFKTQELKDYEDGKSRIIKEGVNLNTTKLVSVKKNANLSIVIQAITDNLKRLLKIIRLQEKASRITKNISKHTSVKVELQDAINKYQDFVHDSILKVKDLENTIYNTLQEMLAIRNDVNEGKYTSVTKFFDQMGSRLKLVIKSQKLITPQLEDASHDQLMNLALTCPKYKNNYYLKKLKQRIEYLNLNNKTKLAQEYESVIQTVENSDFYDNLKTAEIFKSPNKKELKENKKDMQMIFQDPSSSLNERMAVEEIIKEGLDNFPELYSNDE…
CP001621.157	locus_tag=MMCAP1_0169 protein=putative liporotein protein_id=ACU79312.1 location=213034..216135 gbkey=CDS	502.9	558.4	500.9	678.9	700.3	684.3	3	3	337.695	468.913	383.9	1231.9	1251.13	1225.17	MMCAP1_0169	MKKVLGMTLLGSIIATAVASAVSCSVGISLDKILNRKNSNTRVLRELTNYSLANLNSATNNTSNDADIIANLQDVLLAVNNHDHYEGALAEYWDHNKDSDYWKFRLRKNAYWTKIENSKQVKGDLITGQDLFNTFRYVLNKNNLALTTEHFLTNFKYVPQLMDFIDKLSDPKYDKSNGQAKPDKLYDSRFNKDLPGDLRTNELRSSYWIDRAILAFNIEPTNEEKAKNLALDLSMSTKQLAKKSFEEGKIVDNGKSKEKNDNSNGLDSSIFDIGFHLSKKISYFESVISYLAFAPIPEVALLYAEDSGQKSNIYAGTNYGKPLARKSGYNGLWYSGPYVIQDYFPGSNLNLTKNEFYYNKENVHIEKILYSYVNKADAATRRFLFETGDVSSTRINAND…
CP001621.159	locus_tag=MMCAP1_0171 protein=ATPase protein_id=ACU79104.1 location=complement(217943..219247) gbkey=CDS	216.2	179.2	183.9	67.2	68.7	87.5	3	3	145.177	150.482	140.945	121.938	122.737	156.659	MMCAP1_0171	MENMIIPRDFYLNQLLDKKDNGRVKVITGIRRCGKSELLFTLYKDYLLSTGVKKKQIIALQLDGDENIKYRDPLALGSYIRKQIKSKSKRYYVFIDEIQFCYAVFNPYVKEKEPSITFVDTVLGLMKIPNIDLYITGSNSKMLSSEILTQFSDRGDQIHVQPFSFSEIYHLFENSQDALAHYLNYGGMPEIYKLKTEEQKVQHLKQLFKTTYIRDVLLKYDIKNEEQILDKLLDFVSSVVGSLVSFNNLSKQLAANDQIKISPNTIQKYLSYFEESFVLSNARRYDIKGSEYFRSPSKYYFADIGLRNARLNFRQIEDNHLTENVIYNELIKRGYNVDVGMVEYEVNKANTRQKRQAEVDFVANLGHKRYYIQYADNINTKEKREQETNSLLRIKDNFK…
CP001621.16	locus_tag=MMCAP1_0016 protein=mycoides cluster lipoprotein, LppA/P72 family protein_id=ACU79160.1 location=23411..25009 gbkey=CDS	644.9	702.4	651.6	889.7	862.6	869.1	3	3	433.047	589.837	499.399	1614.4	1541.09	1556.03	MMCAP1_0016	MKKAIKLLLSILPISSISVLGVVSCSTTNLNAKQPDKKPGKPNENTPKTPSKPDESKQPDNNNTNPGNSNNDPNNPETKPDPSEKPQSDQSMDKPDEKNDKPSHSDKPQADDSNNNRDTFSDLDKISKEISFRRFSFYTQRDAVTALIDLQKDPSTIYTIFSKDYITIFDKYHIQFLANNGENANNQKGLIEKVKLKFTDKKVGKSKILEFTFTWFKKFENSNNTNNKEKYITKKEKVEKITDLFPSLIGYMLLYSQDHNQYENLMETKNVINFEDLENGNSSLFTDEAPLLNVATIKDYLFEFNPELGKLYKEKITAVRYDDYNGILGVKLEIENRDFDPKTTKEPIIEKEFVFDNFRKVNIKDNEKNPLSLFLTQDKFKEMTKSELLKTKIQELRSS…
CP001621.160	locus_tag=MMCAP1_0172 protein=conserved hypothetical protein protein_id=ACU79811.1 location=219479..220360 gbkey=CDS	346.5	380.7	319.9	171.3	136.1	123.9	3	3	232.673	319.691	245.178	310.832	243.151	221.83	MMCAP1_0172	MKLKDLNLKRLILIDLDGTTLTNQNDQIHKITKKAILDAQKKGHVVCIVTGRPYRAVEHIYKELKLTTLLANFDGAHIHDPNNKLMKRVVLPINCEIIKQIINEPVIKGNVENILIEYYDKSLLWKTDKELEDFFHLNKAKNSKDFQFIKASPYTDWKSPSNNLVLKLKSDKHKDEVIRVLTKYQDAIKIQSDILYGITTSKTKPVITLTNKNADKGFASIFLAQYYNKDIRDVIAFGDQLNDLEMLKTVGCSVAMKNGVNSLKFVAKGITHYTNDEGGLGHYLNLLLAGKEV
CP001621.161	locus_tag=MMCAP1_0173 protein=mycoides cluster lipoprotein, LppA/P72 family protein_id=ACU79092.1 location=complement(220394..222091) gbkey=CDS	260.4	432.6	287.1	401.5	329.2	413.5	3	3	174.857	363.273	220.039	728.541	588.136	740.327	MMCAP1_0173	MRKFNKLFLTILPISSISAFSVVSCTTNTKNNNQIPTIPNNKKPENQTQPEQPSDKKPESTEEHTNKKPNENTNDQKQPNNSEKSDAEPNPGKPENKPNNSHNPKQPEQPKKPEHNDSNSNNNTNNNSNADQPQGDEPQDEPWNKVDFSDINKLDKEVKFEFFTTYSRMDAKSAWVQIQGRQPAIFKEIIFKGKNEILNRYEIEFDSQKVPNIVDEKGTIDNVGIKFSKNGKSKTREFVFTGFRKLENKVDKGKNKDEYIKPKTNIDKSLSGIFPSLVAYMLLYSEETQSNNKYDRNIKQSGNVINFDELKNKNLELFGEYFVGFSVGTKELLFDYKNEYNKIYKDKIVAARYDDINGILELEVQVSNTDEYENRNDPTKSYKFTFKGFRSIDFDNPNK…
CP001621.163	locus_tag=MMCAP1_0175 protein=mycoides cluster lipoprotein, LppA/P72 family protein_id=ACU79138.1 location=complement(222491..224173) gbkey=CDS	332.1	246.2	277.4	397.3	409	372.4	3	3	223.003	206.745	212.605	720.92	730.704	666.742	MMCAP1_0175	MRKFNKLFLTILPISSISAFSVVSCTTNTKNNNQIPTIPNNKKPENQKQPNDKKPGSTEEHTNKKPNENTNDQKQPNNSEKSDAESNPGKPENKPNNSHNPKQPEQPEHNDPNSNNTTDNNNSTNNDEPQADQPQHNQEDDSSNNTEEIFSEIDALKKEIEFNFYTTYKNKDALTSWIEIKSRKQAIFKEVIFSRNIDILEKYQIEFDSQNDPEIIKENGIISNVKIKFTKNGKSKVYEFTFTGFKEEDKIDSKNNKDIYIKQKDKIDVKLAGLYPSLLAYMLLYVEQSGTNIYDRDIKQSGNVINFDDLINNNQDLFDYNFSGFSVGTKDLLFDYNRKDEKLYKDKIVEAKYDDINGTLGLKVEISNRDDNHSNESTITKEFNFNGFRKIDIDNYKNN…
CP001621.164	gene=pgmB locus_tag=MMCAP1_0176 protein=beta-phosphoglucomutase protein_id=ACU79242.1 location=complement(224283..224912) gbkey=CDS	20.4	13.3	12.3	NaN	NaN	NaN	3	0	13.6985	11.1686	9.42697	0	0	0	MMCAP1_0176	MKFKGVIFDLDGVITDTAPLHYLAWSQAVKTIGITNLDKSFLDKLRGISRKESLQVILDFYNLKLDQSQFNNLLEQKNLLYKKALQNIDKTWILPGIIDFIKDLKKHNIKICLGSSSFNAKDILTKLELINEFDYLVDPSEIKHSKPASDIFIKASQLLGLDVKECVVIEDAIAGVQASLNANIFCIGINVEANIKLKSTADLSINLLK
CP001621.165	locus_tag=MMCAP1_0177 protein=neopullulanase protein_id=ACU79321.1 location=complement(224912..226711) gbkey=CDS	26.8	29.6	27.8	40.8	55.7	36.5	3	3	17.9961	24.8564	21.3065	74.0335	99.5115	65.3493	MMCAP1_0177	MKVIDRVAIHHQQRSNMAYCYDKDYIHIILRTKKDDLKKVVIHHGDPFLRGHYLLGSDYIDLKPKEMTKSGSTKLYDYWFVEVKPEFKRLTYFFELFGIEDDHCYFGEKGFYETDDFKMINTGGWGFNYAWMNPNDVYQAPDWINDTIWYQIFPERFANGNKNNDPKNTLAWNSTDPSYNSFFGGDLQGIIDHLDHLVELGVNGLYLCPIFKAKSNHKYDTIDYLQIDPNFGDKKTFKKLVEECHKRNIKVMLDAVFNHAGYWNKFWQDVLKNQENSKYKDWFYINKFPLQEKIIDKNNQEKTVNNYYTFAFHEVMPKINTTNKDAKKYLLKVANYWIKEFDIDAWRLDAANEVDHEFWRDFRKTVNKNKPIYILGEIWGYAHPWLKGDQFDGVTNYMI…
CP001621.166	locus_tag=MMCAP1_0178 protein=neopullulanase protein_id=ACU79396.1 location=complement(226830..228626) gbkey=CDS	169.5	143.6	141.7	15.6	24.4	18.7	3	3	113.818	120.587	108.602	28.3069	43.5921	33.4803	MMCAP1_0178	MVNIERAAILHIPKSNMAYCYDKDRIHIVLRAKKNNLKEVIFHCSEPFEPKVVVETNNYDLNLEKTAMRKVGSTEIYDYWFISVKPPFKRLSYYFELASENERIYYSQKGFYPLEKIKSVQTSQFSFPWMNEIDIFDVPTWVKDTIWYQIFPERFANGNPEISPKNVLAWNSEAPAANNFFGGDLQGIIDHLDHLVELGVNGLYLCPIFKARTNHKYDTIDYFEIDPHFGDKKTFKKLVEECHKRNIKIMLDAVFNHFGYWHPYWQDVLKNQEKSKYKDWFYINKFPVEKLDENLTENTSLDLNYYTFAFTGYMPKVNTSNPEVKKYLLEVARYWVEEFDIDAWRLDVANEIDHHFWREFRQVVNQKKRTYILGEVWSDSNPWLKGDQFDGVMNYVLTR…
CP001621.167	locus_tag=MMCAP1_0179 protein=putative liporotein protein_id=ACU79715.1 location=228884..230683 gbkey=CDS	106.4	135.7	127.2	328	322.7	325.5	3	3	71.4471	113.953	97.4886	595.171	576.524	582.773	MMCAP1_0179	MKKILTMLTSLVVVGGSALTVLACKTTNNTDIVVQANDKWVPIYQQAANKVNKRFEEQGYKWRVKLKEIGLFDEKKLIDGRGVRDKGISDIFAIPLDRYPQYINQNTLKDLTEYIKKDLIKTKEDEDRFGIKIDNSKSGVDAIKLEKNVNTWKTVLGSDLKGNRLYGMIPMSIENMIWLFDEDRLGIKKEKGDDNKLYAYLVGSELEKVKNQLEKYEEKDGVGKKLIGKPKASIENLIILNKAQTNDYKFENLNEIEDKENVNKGAPLAFVDAGASFQGGMFLNSILNKRADDISKLKADNSSLGMVWVNKNKSLNSTNINDFDSIWENDMFKEDFNQTTQTIVDYVKSLGGHITEIYGGAAGQINQILDDALRDGTIAMTLVGPWEVSSKLETMRKAP…
CP001621.168	locus_tag=MMCAP1_0180 protein=putative liporotein protein_id=ACU79535.1 location=230978..232768 gbkey=CDS	145.9	196.6	176.8	527.5	519.6	518.3	3	3	97.9711	165.094	135.503	957.174	928.298	927.96	MMCAP1_0180	MKKILTMLASIVVVGGSALTVLACKTRNNTDIVVQANDKWMPIYQKAADKVNKRFEEQGYKWRVKLKQIDIFAEKGLIDLRGVRDKGVSDVFAVPLDRFPQYLNQNTLKDLTEYIKTGIAGDSEAKERFGLDIVEGKTGVDAIKLTKNQNSWKTALGSDIKGKRQYGMIPMSIENMVWIFNENRLGIKKEKVGDKEYSYLVGTEVDKIKDKLDKYDDKSQANGRLKDKPKASIENLIKLNESQTNAYKFEDSKEIDTSKVNKGAPLAYIDAGGSFHGGMFLNSILNKRAEDIAAEKSESSSLGMVWVKKGKAINSTNKEDFDSIWENEKFKNDFDNTTKTIIDYVKSLGGHINEIYGGAAGQIGQILDDALRDGTTVMSLVGPWEVSSKLETMKKAPKN…
CP001621.17	gene=tnpA_1 locus_tag=MMCAP1_0017 protein=IS1296 transposase protein A protein_id=ACU79692.1 location=25095..25637 gbkey=CDS;gene=tnpA_2 locus_tag=MMCAP1_0265 protein=IS1296 transposase protein A protein_id=ACU79838.1 location=335245..335787 gbkey=CDS;gene=tnpA_3 locus_tag=MMCAP1_0306 protein=IS1296 transposase protein A protein_id=ACU79422.1 location=384271..384813 gbkey=CDS;gene=tnpA_4 locus_ta…	NaN	NaN	NaN	21.3;21.3;21.3;21.3;21.3;19.6;21.3;21.3;21.3	14.8;14.8;14.8;14.8;14.8;13.5;14.8;14.8;14.8	13.5;13.5;13.5;13.5;13.5;12.4;13.5;13.5;13.5	0	3	0	0	0	38.6499	26.4411	24.1703	MMCAP1_0017	MSKLNLEKKLKIVKEAKKLNIKKSAHLANKYDISVETVKSLVNRFEAFGIEGLINKDKKPYYSAKLKLKVVLYKLETNQSYDEVAKKFNIIYSSTIAGWVKKYREYGFLGLNNNIGRPKKIMKNPNKKPAKIKKSQVKINNEQQIKELKEQVEYYKLEAEFWKKFHTLLTKEKSTRKKQK; MSKLNLEKKLKIVKEAKKLNIKKSAHLANKYDISVETVKSLVNRFEAFGIEGLINKDKKPYYSAKLKLKVVLYKLETNQSYDEVAKKFNIIYSSTIAGWVKKYREYGFLGLNNNIGRPKKIMKNPNKKPAKIKKSQVKINNEQQIKELKEQVEYYKLEAEFWKKFHTLLTKEKSTRKKQK; MSKLNLEKKLKIVKEAKKLNIKKSAHLANKYDISV…
CP001621.170	locus_tag=MMCAP1_0183 protein=maltose ABC transporter permease protein protein_id=ACU79380.1 location=235788..238328 gbkey=CDS	93.4	85.3	87.9	134.2	155	139	3	3	62.7176	71.6302	67.3683	243.512	276.917	248.865	MMCAP1_0183	MKTEVKQNVDQKALVFSSLLKPVEKYDFSSFKKSNNWNIIKTKLLEDEQIKSTNKIKDYQLFIKSNYIVGNIVDIYKKFTTDSKLIEGLLLLLVANSFSTFNDKNNFNISNANKTMNQIIESKYVQKEIINEINVYEKQKSLKDFDHFDFKNLELYEFLNSWKKINAIIVTYFKKINLEKLGKILASEFLLTYETHKEAMDFVSLNIIQHEHLSEDYAFNKINDLLEQAFNELVNKNVENITIQETIILALKKSLTYQVDTHKKSWWEKLVENRKSKEKFRLYCSEEINERLAKELRLLTNPKVLDKSETKKEEQNEKFVHYNTLKINNKSYKIDAESLKFAKLIFKEKDLIDFQASLSETYFRSKHLNFNKYYNHLYIIKLSSLAYLYALKNKDNKIN…
CP001621.171	locus_tag=MMCAP1_0184 protein=multiple sugar-binding transport ATP-binding protein MsmK protein_id=ACU79523.1 location=238330..239415 gbkey=CDS	346.1	360	374.9	832	805	760.7	3	3	232.404	302.308	287.331	1509.7	1438.18	1361.95	MMCAP1_0184	MKVELRNISKKYEGNSFYTLENIDLTINDNDFCVILGPSGCGKTTLLRIIAGLNSITKGDLLFDGVKVNNLLPKDRDIAMVFQSYALYPHYNVYKNLAFGLEMKKEKKEIINHRVRGAAKLLNIEKYLFKKPKELSGGQQQRVALGRAIVRKPKLFLMDEPLSNLDAKLRESMRTELVSIHRILGTTTIYVTHDQLEAMTMATKIVLMNNQVIQQVGKPEEFYNKPNNLFVAKFIGTPTMNVLEGKLENNYFISNINNYKVELSDEELELIKKEEVTKLYLGIRSEDAQLVKTTDKTANIVASVINTELLGMNKQVTCELTPGNNFVITTSKDNNIKIDDKVGIKIHKYHLFNGITENRIG
CP001621.172	locus_tag=MMCAP1_0185 protein=glycosyl hydrolase, family 65 protein_id=ACU79247.1 location=239523..241820 gbkey=CDS	371.6	367.4	376.9	175.9	175	187	3	3	249.528	308.522	288.864	319.179	312.648	334.803	MMCAP1_0185	MKTNIDVNIKRLFEVDPWKLVENKLPDNGYDFRLSESITSLGNEYLGMRGNFEETYSGDTHKGCYVGGLWYPDKTIVGWWKNGYPNYFGKVINAVNLLGLNVVIDNVELDLFKQTPSSYKRTLDLKQGILSREFVTNINNKEIKVETERFVSIDTKELVAIKYSITSNKDISLDLTSYINGDVINRDSNYKTKFWTHLDSLANDHSQLVVSKMIENNFDIQRFSYACYATNSYNLKTKDIVFDQSNLYAKTTYKFDLKANQTLIFYKLVTLVHSLNYSEDQLKENAIQINNQINQFDYEQLKEKHTSLWEKRWLTSDVKIIGSDLDQQAIRFNLFQLFCTYYGNDDRLNIGPKGFTGEKYGGATYWDTEGYCLPLYLKTSDPKISRNLLKYRHNHLTKA…
CP001621.173	locus_tag=MMCAP1_0186 protein=trehalose-6-phosphate hydrolase protein_id=ACU79350.1 location=241822..243426 gbkey=CDS	407.9	321.5	367	230	203.1	204.9	3	3	273.903	269.978	281.276	417.346	362.851	366.851	MMCAP1_0186	MANYWWKNTVVYEMYLQSFKDSNNDGIGDLDGAIEKLEYLKELGIGAIWLTPIYDSPLVDNGYDISNYQSINQIYGGLEKFKKFVDKANELNIGIIMDLVLNHTSDQHEWFKQSRSSKTNPYRDYYIWRDQPNDITSAFGGSAWTYDETTNQYYFHMFAKEQPDLNWENPKVREEIAKMVKWWCDFGIMGFRLDVIELLGKKIDQKILSNGPMLHKYIQDLRKNSWDSNEFLTVGECWSADIDHAIQYSNEKNEEFSMVFNFEPITSFFNKINKYKTMDVDFLEFKQIYQKWQQGLHNKGWSGLFLSNHDLPRMVSRYGNDHKYRIDSAKTLLTTFFLMQGTPFIHQGDEIGMTNVKWTDLNKYKDVEIKNTYQSEVLEKQVLTYDEFIDGILVNSRDH…
CP001621.174	locus_tag=MMCAP1_0187 protein=transcriptional regulator, GntR family protein_id=ACU79851.1 location=243449..244168 gbkey=CDS	1185	754.5	824	292.6	396.7	341.2	3	3	795.722	633.587	631.53	530.936	708.729	610.882	MMCAP1_0187	MQDKKNKEITERQKIVNYLLDLIEHKKVDLKTPLPSEYFLVTKFKVSRGTVRSAFSDLKTKGLIKSSKGAGYFINPDFSFNRIKSIRNQLLSNKQEVIIETELDTSNLITIIHKLHLNLDINPDDYFSYIKVFYVDDLPVRYAKSFINKNLFENEIDSEKIRSSLIEYLEQNNIEPFKLTCVLESKLKDQMTRNLLVDNHQDYVICRYSILYDKDDNIVEITQHTINIDHFETSYIKYL
CP001621.175	gene=pepF locus_tag=MMCAP1_0188 protein=oligoendopeptidase F protein_id=ACU79734.1 location=complement(244197..245990) gbkey=CDS	2514.5	1993.1	2169.7	435.8	410.5	430.1	3	3	1688.47	1673.69	1662.9	790.78	733.384	770.048	MMCAP1_0188	MKRPEALKEYKWDFDYLYKNQDEWKKDLDYLVEISKEFKNFKNKLHEKETFLKCLDLEEKVDFITNKLSTYTRMGDTNQADEVYRTLEALLMNVLQDIEIETSFISPETKKIGFETISKWLKETKDYQRYLYGYKKFFEQAKHILSEHDEELLSKISKGYTAISGMYDTLAYADRQEETINYKGVDQVLTNSLFLEILQDSDPIKDQDLRLKASEIFSKNFSLKKHSFALIYEGILQSDHEDTKLRNYDSSLQASLSSDSVSVDIYLKLLEVGKKYIKPLEDFLLLTKKHFKLDKFYPSDRQLKLVKEYNQTFTVEQAKEHIKKALSILGEEYLKNLEIAWGPNKIDYYEDTNKRDGAYSTGGHGVDPIILMNWDDKLNSVNTLAHECGHSVHTLFSEQ…
CP001621.176	locus_tag=MMCAP1_0189 protein=conserved hypothetical protein protein_id=ACU79804.1 location=complement(245990..246673) gbkey=CDS	3195.7	3019.7	3288.8	1338.1	1410.8	1357.2	3	3	2145.9	2535.78	2520.6	2428.05	2520.48	2429.92	MMCAP1_0189	MKLKNWTFYKAKQFVKLNESNEILKDLAVLVLRPDINKEKTLLAIGLDKKVVNSLIIDLQNKVFEENELFEIFKENIGFVSTEEISEIDAKGLNLSTPIHPDNIKSIIKIYNLFLNVEPIEFDTKDYQDLETIQNQEDVFTNVDFENIPLPALLQTLNVGMENYKQRVEEIFELDGKESINKKLELVNIQSNLIAFFDQALRKMDEIITKLSEQNAELIKKLESQEK
CP001621.177	locus_tag=MMCAP1_0190 protein=leucyl aminopeptidase protein_id=ACU79684.1 location=complement(246689..248044) gbkey=CDS	1160	1739	1420.3	2459.1	2441.1	2535.1	3	3	778.934	1460.32	1088.55	4462.15	4361.18	4538.82	MMCAP1_0190	MLKFNDKKEELTLVCLTDVKNKKYVVDTDLSTSFISEEKTIYMLIKKDQKDLFRKLKIAFKNFVLENKYNINIDVDSFFNLLNECDCKEKLINTIYETIAFETFDKVSYKKDNKPNEVVYNLLTSFDVKDLEQKEAIKMEFVNFARMLQDTPPNIATSEYLAEKVVQKAKEIEGIKVTVLGKKEATKLGMNLFLAVNAGSPYEPQAVVLDYVGDENEPKKALVGKGITFDSGGYNLKPAKYLEGMKFDMSGAAIMLSTVMALAKMKAKVNVVGIGMFTDNRIGSTATLPQSVVKSMNGLTVEIDDTDAEGRLVLADGITYVIREKQATEIWEASTLTGSVVSALGSYATGVFTHCNKRWQLVESISEFSGERMWRLPLYEEHLEEVRNDAINADITNAT…
CP001621.181	locus_tag=MMCAP1_0195 protein=ABC transporter, permease protein protein_id=ACU79495.1 location=complement(251371..254481) gbkey=CDS	174.4	236.2	196.4	132.1	136.6	135.3	3	3	117.109	198.348	150.525	239.702	244.044	242.24	MMCAP1_0195	MKKLLKRSYFAFVLLFIYAPILAMVVFSFNNGDTTIKWTHASFSWYESFFKNSPFIKSIITSLFVAVISTIVSLVIGTLAAIGLSRVSRVTRNKWVSVANIPLINADVITAVSLMIVFLIMGLKFGLLTLIMAHISFNVPYVLVTIMPRLKKIDPSLIDASYDLGAKNHQVMFKVILPILKPAIITAAAIAFAMSFDDFIISYFTGGMQTNVSTFIYTAKKTRPFIFVFGTCLVLVIALSIITWNAINLIKQSRLETKQKLINNNYKLKTISKLNKQLDELNQILKTKTIIKKSHNLSLWIKYFILKTKLYFYKLKSLDKKISKLQWKQYKLKSKIQKEERYYSRLKKSEKKLKQLIKQFSSEKDVKKAAKLSLQIETLQEKVEFLKDQIEVIKEREQT…
CP001621.182	locus_tag=MMCAP1_0196 protein=spermidine/putrescine ABC transporter, permease protein protein_id=ACU79397.1 location=complement(254466..255458) gbkey=CDS	78.7	91.5	68.2	54	58.6	58.4	3	3	52.8467	76.8366	52.2699	97.9855	104.693	104.559	MMCAP1_0196	METKNLKDNNVIENKIINQDELEHVIETIEKQKKRESARLKVKDINHYLSKTKLFHFTKDKVWPILAPFILVMVILVILPLVSILIYAFIQPADGITLFKISFEKFVKLFTSNGILYSLFLSILYAIVAGMLCVLIGYPIALMMAQMKSKILARNMWVIVTMPMWISMLLKVLGLQTLFYLLADFAIGTPIAIIIGMTYMFLPFAIAPIYDSLESRQTDLEEAALDLGASKFRTFWSITLRSSMPGVLTAFSLVLVQAATSLIVVHYMGGGRIYLVSAAIESYFFQGNDFGYGAAVSVVLAILVFGLMLVMKLISNKFEMKGNKRKWKNS
CP001621.183	locus_tag=MMCAP1_0197 protein=spermidine/putrescine import ATP-binding protein PotA protein_id=ACU79304.1 location=complement(255458..256513) gbkey=CDS	692.5	535.2	561.3	406.2	366	340.3	3	3	465.01	449.431	430.192	737.069	653.882	609.271	MMCAP1_0197	MENNILELRNVTKEYDGQVVLKGISFNVKEGEFITLLGPSGCGKTTILKIIGGSQKPNSGEILFEDKNLIPIPINKRQFNTIFQSYALFPHLNVFDNVAFGLTIKKTKKDIIEREVMRQIRQVGLEGYENKKIDELSGGQKQRVAIARALVMKPKVLLLDEPMAALDVKLRKTMQEELKRLQQDIGITFIMVSHDQEEALSMSDRIVVMNQGTIQQIGTPEEIYNEPENAWVANFIGSSNIITDGIFLEDNKIKFDGKVFECIDTNFGENESSIDIIIRPEDIIIKNPNNGFFNAKVIKTTFKGIHWEVVVETSKKRQWIIHTINEYDIDQQVSIKWKPANVHVMWKEVDN
CP001621.184	gene=rplT locus_tag=MMCAP1_0198 protein=ribosomal protein L20 protein_id=ACU79215.1 location=complement(256887..257246) gbkey=CDS	2502.2	2072.6	2392.6	2781.7	2890.8	2710.7	3	3	1680.21	1740.45	1833.74	5047.53	5164.59	4853.22	MMCAP1_0198	MARVKYGKVTRARRKRWIKLAKGYFGTKKSSYKKAHEQVIRSMAYAFIGRKERKRDFRSLWIVRINAAVRPEGLSYSTFMHGLKLANININRKMLSELAINNSEEFKQIVQQAKKALNK
CP001621.186	gene=infC locus_tag=MMCAP1_0200 protein=translation initiation factor IF-3 protein_id=ACU79816.1 location=complement(257482..258027) gbkey=CDS	745.5	1195.3	1113.2	795.9	778.2	853.3	3	3	500.599	1003.75	853.179	1444.2	1390.3	1527.74	MMCAP1_0200	MENRNRNSRPIKNQDPVNEFIRAHQVLVIDEDKQNLGVMSKRQALEIARSKNLDLYQVGVQPDGTVITRIVNFGKLKYEQQKKSKEAKKHQTKIENKEIRITVNIGKHDLETKARKAKEFLEEGSRVKVSLKFRGREVVYLDLGQQTLNNFFELVSDVGKMEKEAKLNGKFLDMYIVPKKN
CP001621.187	gene=def locus_tag=MMCAP1_0201 protein=peptide deformylase protein_id=ACU79524.1 location=complement(258216..258818) gbkey=CDS	1682.5	1197.6	1365.8	710.9	697.4	686.9	3	3	1129.79	1005.68	1046.78	1289.96	1245.95	1229.82	MMCAP1_0201	MDKSYLLQDQIPSNSWLVKDHKKEIIRTKSTKIIDPTNLSNDEELVLKKLIDFVTFSQDENNNNINNKDYLRPAVGLAAPQIGVNKDMFYVRFQLDNNKIEQYAMINTKLISTSTQIACLKNGEGCLSVDNDHLGFVPRHYKIVVQGYDWLTKQYLTLTLRNYQAIVFQHEMDHNIGVLYYDHINKADPLYKDNSWIIIE
CP001621.188	locus_tag=MMCAP1_0202 protein=methyltransferase protein_id=ACU79617.1 location=258892..259449 gbkey=CDS	264	304.8	341	80.8	108.3	116.1	3	3	177.275	255.954	261.349	146.615	193.485	207.865	MMCAP1_0202	MHIISGKYKKMKLQTLDSSITRPTLTRIKEDMFNIISNYFIFENKTSLDLFGGSGSLSIEGLSRGIKFAIINDLNKDANKIISFNLKKIPTSDYVLYQKDYLELLNLLKIQHQKVDLVYLDPPFKEIDYYYVVFDFLINNNLLNDWAIIISETNQKLDLTKIKDLNLLKFKDYNKKYLYIFRLEK
CP001621.189	gene=gmk locus_tag=MMCAP1_0203 protein=guanylate kinase protein_id=ACU79352.1 location=259452..260345 gbkey=CDS	1311.8	943.3	1014.9	275.6	275.9	276.6	3	3	880.867	792.131	777.84	500.089	492.912	495.223	MMCAP1_0203	MKKGKMIIISGPSGVGKGSVNGELLQNPDLRLKYSVSMTTRKPRNGEINGVNYFFVSNEEFAKAIVNDELIEYAHFVGNSYGTPRKYVEQELKKGNNVILEIEVDGATQVLNKEANVLSIFLMPPNLTELANRIRGRQTEDEEKIKARLDKALLEIPLKHNYQYVIENDNVANAVAKITDVLHLEGLTDIKTPTVYERLEQIVEQIVKEKYMYFVNNWETNVKLLAKNEEEKNKAKNFDAETYLIKLLTKKVYHKVLGHGDFSKLLDKDFVDFKIQKLMFKINFFSVEQKHYNNDEF
CP001621.190	gene=sun locus_tag=MMCAP1_0204 protein=ribosomal RNA small subunit methyltransferase B protein_id=ACU79450.1 location=260335..261594 gbkey=CDS	156.4	126.4	151.6	22.7	28.3	36.1	3	3	105.022	106.144	116.189	41.1902	50.5597	64.6332	MMCAP1_0204	MNSRSIAFDILKKVFVNKAYSNVLLNKISKKNLNQQDKDFVFNLVHGVISNKIHLDYLLGKLIDVKKTSIDLQIILLISLYQMIYLNSIPNYAIVNESINLIKTTSQKQANFINAILNKFLRFKDKYLEINLDNKDLELCILHSFSYELYLMLIKQYDKEIVNQIVVNNHQIPKLYIRVNTLKITSDQLFNKYKDIYLLEKTNVKDCLIANKTIINSDLYKNGFITIQDKASILVSQILNPSLNTKVLDMCSAPGGKLTHLSMILKNTGNIVGNEINESKIKLIKENINRLNCLNISVINMDARKIKQKQEFDYILLDAPCSGFGVFKRKPEIKLRFDQIQVNSIINLQEELLESAYYNLKNNGEMVYSTCTINQDENQNQINKFLNKHKDMIKLYEQQ…
CP001621.191	gene=typA locus_tag=MMCAP1_0205 protein=GTP-binding protein TypA/BipA protein_id=ACU79346.1 location=complement(261598..263427) gbkey=CDS	2231	1706.8	1962.4	201.1	244.5	240.8	3	3	1498.11	1433.28	1504.02	364.905	436.814	431.126	MMCAP1_0205	MNNQKIINIAVIAHVDAGKSTLVDALLKQSGVFRQNQEVIEQVMDSNDQERERGITIYSKNCSITYKDYKINIVDTPGHADFSSEVERIMKTVDTVILLVDSSEGPMPQTRFVLQKALEIGLNPILFINKIDKKDQRSLEVVEEVIELFLELNATDEQLDFKTLYGIAKNGIAQYSLEEQSNDLTPLFETIINQVGSYPIELSNNDLVMQVSSLAYDSFIGRIGIGRIFEGSIKENQIVSIVKNDRTVKQGKIAKLMVYQGLNRVQVKQAFAGDIITFAGIEDISIGDTINNLNVIKPLKPIHIEEPTMSMNFLVNTSPFAGRVGKFVTSRNIKERLEKEVEVNVGLRIEPLINSEIEGFKVLGRGELHISVLIEAMRREGFELAISKPEVIFQRNPMT…
CP001621.196	locus_tag=MMCAP1_0211 protein=transcription regulator GntR protein_id=ACU79264.1 location=complement(268986..269819) gbkey=CDS	36.2	28.3	29.7	NaN	NaN	NaN	3	0	24.3081	23.7648	22.7627	0	0	0	MMCAP1_0211	MTEKQIIRTIKKISLDTDHRFCFIANYVLNNLDSIEKMTINQLAKATYTSVATINRFVKFLNLDGYKELVHIIKYFKNSLQGDQITYSLTSNSLILNAYNNIISSLNETFKLTIEQQDTIKNLISKIKNALKIAVFAVGGTFNVAKDFEQKLLRIGFNITAVNDFHNAYLLACQLNKNDLAIFISYSGETLDLIKLAQVCTKNNVQIAVVCKATNNTLSNLSNYLINISSNEKIDRLVSSTSRFSLLFALDLIYIFLLSTDLKKYTKLLEKTMISKF
CP001621.198	gene=eno locus_tag=MMCAP1_0213 protein=phosphopyruvate hydratase protein_id=ACU79555.1 location=270234..271589 gbkey=CDS	20180.8	14378.1	17339.5	4660.4	4725.3	4543.1	3	3	13551.3	12073.9	13289.3	8456.52	8442.04	8133.93	MMCAP1_0213	MSRIERIFAREILDSRGTPTVEVEVWTEFGGYGCAKAPSGASTGVNEALELRDGDKARYNGKGVLKAVKNVNEIIAPKLIGIDALDQLTVDRIMLDLDGTEFKTKLGANGILAVSLAVAKAAASELDIPLYKYLGGVQAKKLPVPMLNVINGGEHADSAIDFQEFMIMPVGAKSFSEALRWSSETFQALKSLLKSKKDITAVGDEGGFAPNFEWAYEKHDLKSFKAKTPAEIALDLLVEAIKKAGYKPGKDGIMIAMDCASSELYLEDKKYHFKKIEKVTNQEWSLTTDEMISYLEKLVDNYPIISIEDGLAETDWEGFTKLTQKIGDKVQIVGDDLFTTNPKFIKQGISKKAANSTLIKLNQIGTLSETVEAITMTQKAGWTAVVSHRSGETEDTTIA…
CP001621.2	gene=dnaN locus_tag=MMCAP1_0002 protein=DNA polymerase III, beta subunit protein_id=ACU79861.1 location=1511..2638 gbkey=CDS	1076	898.5	935.2	702.5	691.4	626.5	3	3	722.529	754.51	716.756	1274.72	1235.23	1121.68	MMCAP1_0002	MNFSINRMVLLDNLSKAAKVIDPKNVNPSLAGIYLNVLSDQVNIIATSGILSFKSILNNQNSDLEVKQEGKVLLKPKFVLEMLRRLDDEFVVFSMVEDNELIIKTDNSDFSIGVLNSEDYPLIGFREKGIEFNLNPKEVKKTIYQVFVSMNENNKKLILTGLNLKLNNNKAIFSTTDSFRISQKILEIQSDNNEDIDITIPFKTALELPKLLDNAENLKIIIVEGYITFIIDNVIFQSNLIDGRFPNVQIAFPTKFETIITVKQKSILKVLSRFDLVADDGLPAIVNIKVNEDKIEFKSFISEVGKYEEDFDDFVIEGNKSLSISFNTRFLIDAIKTLDEDRIELKLINSTKPIVINNVYDEHLKQVILPTFLSN
CP001621.20	locus_tag=MMCAP1_0020 protein=transcriptional regulator, RpiR family protein_id=ACU79146.1 location=complement(27535..28332) gbkey=CDS	107.1	97	103.2	5.4	5.8	1.7	3	3	71.9171	81.4552	79.0946	9.79855	10.3621	3.04367	MMCAP1_0020	MAIDLLTKIKDFIKTDCSQDYKNIGTYLLKNYTNIKNLTITAISKECNTSPNKITRFAEKLNLKGFNELKFRLNDISNSIIIDNELIPISSRIDDKAKFYNDYFEILLNSIKQQQINLKTQPINEVVNLINKANKIYLFAFNLSYNVSKNFIQRLRWYQKEAISESDYISIKTYLNIIKPDDLVILITISGENEYIKKIAESLNKKVKIIGIGPKQSSMISLFDKYFYFETDESELWSINSIKAQLVIQLLDFVYVKWLKSTKRK
CP001621.200	locus_tag=MMCAP1_0215 protein=conserved hypothetical protein protein_id=ACU79729.1 location=272479..272910 gbkey=CDS	134.6	104.7	128	NaN	20.7	8.3	3	2	90.3832	87.9212	98.1018	0	36.9818	14.8603	MMCAP1_0215	MTQSIIALDIGSKTIGLAYSSGVIASSLDTIRFEEYNFNQGLKQLDSYLKKYNPSIIVVGYPKNMNNTIGERAEMVDYVIEMFLDMYKNFNEDQIIKIDERRTTKIAKNILIQANLTREKQKKYKDSLAAQLILELYLESRKL
CP001621.201	gene=hpt_1 locus_tag=MMCAP1_0216 protein=hypoxanthine phosphoribosyltransferase protein_id=ACU79370.1 location=272916..273488 gbkey=CDS	4347.2	2120.4	2930.7	480.1	442.3	459.5	3	3	2919.12	1780.59	2246.15	871.164	790.196	822.685	MMCAP1_0216	MQNLHPLVKEVLFTREQIQNRTKDIAKEIESYYKDKHLKDNSLLVVGLLKGCVPFYTDFCMVCDLTMEMDFMVVSSYHGSTSSNSAPKINLDLNTDVKDRDILIVEDIIDTGFTLKYVKEYLLNKGAKSVKILTMLDKPSGRKIDLVADWVCFTIDPCFVIGYGLDYQEKIRNLPYVAVCDTTKLDDWKW
CP001621.202	locus_tag=MMCAP1_0217 protein=glycerol uptake facilitator protein protein_id=ACU79091.1 location=complement(273548..274321) gbkey=CDS	NaN	2.8	NaN	168.4	178.8	193.3	1	3	0	2.35128	0	305.57	319.437	346.083	MMCAP1_0217	MLQQIILTELFGTALLVLLGNGIVANVVLKGTKGQNAGWISITAGWGFAVFIAAGISAGLGGVAHLNPAVTIMFAIKAANNTFGFDTDAIKQISGVGLFFIVLIVQFIGAILGAIFVDLLYWKHILTTKTDDDFQPRVLAIHSTGATHKTPVLNFLMEFIGTVVLLVGIWGLTAAKSSVFGNIGPLAVGLLVFGIGLSLGGTTGYAINPARDLGPRLVHTFLPLKDKGSSEWSYAWIPGLGPVAAAVVIGLIAMAVK
CP001621.203	gene=glpK locus_tag=MMCAP1_0218 protein=glycerol kinase protein_id=ACU79415.1 location=complement(274362..275879) gbkey=CDS	11400.5	7804.9	9335.3	1072.3	1085.4	1075.7	3	3	7655.38	6554.12	7154.76	1945.74	1939.13	1925.93	MMCAP1_0218	MTDSKKYILTLDEGTTSARALITDKQGNIIAVEQSEFTQYFPKEGWVEHDAIEIWNTQRSALVQVLNKSGIDPSQIEAIGITNQRETAVIWNKETGLPIYNAIVWQDQRTADYCQTFDKDTLEMVKERSGLIINPYFSGTKVKWILDNVPNARQLAKDGKLMFGTINTWLIYRLTGGEVFVTDHTNAQRTLLYNIHTNDWDDELLKLFDIPRNILPEIKSCSEVYGYTFKGLFSKGNEQRIKIASSIGDQQSALFGQLCLEKGQVKVTYGTGCFILTNTGEEIVKSNHGLLTTVAYSFKDKVYYALEGSVMIAGAAVQWLRDNLRIVYNAIETEWYAGQVKDDRRVYVVPSFTGLGSPYWDSFSRGAIFGLDRGTRREHIVRATLEAIAYQANDVVDAM…
CP001621.204	locus_tag=MMCAP1_0219 protein=glycerol oxydase protein_id=ACU79179.1 location=complement(275896..277059) gbkey=CDS	4543.6	3785.5	4387.6	710.2	679.6	670	3	3	3051	3178.85	3362.74	1288.69	1214.15	1199.56	MMCAP1_0219	MKQTKVDICIIGGGIIGASVARELAKFHKKIVVLEANPRLALETSSHNSGLVHGGFDPRPETLNAKLNVLGKKRYEDWIKEMDFPYLRIDSTIVAFNDEEMKHVHMLYDRGLINGLDPKEMEIIDAKELQKREPNISKQAVGALVCNSSIAIDPVVLTTTLMRNAIKNGVELKVNSKVVDIKKVDNIFEIKTAKDEIIQAEVIVNVAGHYADIIANMVGYGDFKLTTRRGEYRILDKSEAGIVNSVVFMVPTIHGKGVIVAPMLDGRVMVGPTALDGVPKEETLLVTQQQYDNIGKIGKHLIPNINMDKTCTVYAGSRPIDVETNDFVIRPAKADKKFINVAGMKSPAIASAPAIADMVCDLVKSAFDKLDKKANWQPKEEAILPWK
CP001621.205	gene=pfkA locus_tag=MMCAP1_0220 protein=6-phosphofructokinase protein_id=ACU79472.1 location=277394..278374 gbkey=CDS	9517.5	5674.7	5902.6	2098	2085.2	1835.7	3	3	6390.95	4765.3	4523.87	3806.92	3725.34	3286.62	MMCAP1_0220	MIKKIGILTSGGDAPGMNNAIAGVVKTAASKGIEVYGINDGYKGLVNGWFEKLNVEKTLDILSRGGTYLGSARLPEFKELEVRQKAVANLKKAGIEALVVIGGDGSYMGAQKLTEMGINCIGLPGTIDNDISSTDYTIGFHTALNTIVEAVDRIRDTMQSHNRADVVEIMGNGCGDLVTYTAVATGAEIFSPAEDLLTIEQMGQKAKQFRLLGKKSLIILVSEKSYGISAEEIAEKIQKISGYETKATVLGHIQRGGRPTAMDRYIAFTAGMFAVEKLAEGKGGLFIGLENNKLVARDIDSTLNMKKEDKKPFINYLREINGYFSK
CP001621.206	gene=pyk locus_tag=MMCAP1_0221 protein=pyruvate kinase protein_id=ACU79359.1 location=278445..279881 gbkey=CDS	6863.1	5241.1	5877.8	1089.8	1107.1	1077.6	3	3	4608.54	4401.18	4504.86	1977.49	1977.9	1929.33	MMCAP1_0221	MTKETLQKRMKRTKVITTIGPSTHSAEAIKELFNNGMTTIRLNFSHGSYEEHGYRIKAAKKISKALNKPISIILDTKGPEIRLGKFKDNKQEVVKGQSITIYTDTYSYLNKECVQGEMTVAYDMSVDLKPGDMILIDDGKLELTVDSVEPQIIKATAFNHHIVKTNKRVNLPGIDFSLPFLSEKDEKDILFGCEQGVDYIAASFVNTAENVRQIKEILNKANANHIQIISKIESQVGLDNIDEIIEESDGIMIARGDLGLEIPYYDVPYWEKIIIRKCREKGKIVIVATQMLETMTENPSPTRAEVTDVYFATELGADATMLSGESAAGDYPFLTVHTMSTINKRAEVEFYNKIYYQVQLDNARNSTSGPRAEIADLLATKTKDGEYKYAIVLSKTGEL…
CP001621.207	gene=thrS locus_tag=MMCAP1_0222 protein=threonine--tRNA ligase protein_id=ACU79807.1 location=280146..282065 gbkey=CDS	2139.7	1709.5	1741.8	293.7	320	303.6	3	3	1436.8	1435.54	1334.95	532.932	571.7	543.563	MMCAP1_0222	MKIKLLDGSIKEYNQEISIKDISSEIGLKNVIGAKINDQLFDINYLIKNDCDLELITNKSKEYDLMLNLTAAFITSYAINSFKSISQAENFYNADEMEFSTTFDTEPRLVLDDLKNIQTNINNLLTSNLEIKSNIYDLNKALEILNNDYQKHLAKQMYEKYNYVKVYSINDFYMVIDKALILNSNFIKIIDIEQLTGSYWLNDKNNIMLQRVHGLCATSSSELKNKKVILEDRRSRDHRLINKTLNIFGFDQLVGAGLPLWLPNGFIVKNEIEKYLRQKEWEYDYIPVETPPIGTVELYKTSGHWDHYGEDMFQPFNGGKGSDEQFILRPMNCPHHIAVYKQEQRSYRDLPLRICEHAIQHRFESSGSLTGLERVRGMKLTDSHIFVRSDQIEDEFRST…
CP001621.208	locus_tag=MMCAP1_0223 protein=NADH oxidase protein_id=ACU79270.1 location=282548..283912 gbkey=CDS	42041.3	26493	34928.5	4919.8	4780.9	4336.1	3	3	28230.5	22247.4	26769.9	8927.21	8541.37	7763.32	MMCAP1_0223	MKVIVLGTNHAGTTAVRTLKRLDPTCEVTTYDKNDAISFLGCGIALWVKGEVKDPNMLFYATPEILRSEGVNVFMNHEVLSVDDKAKTVTVKDLKTGEVKTDNYDKLIVATGTWPLIPPIPGIDLEGVQICKNYHHAKKILEHNLDKSYKKIAVVGAGYIGVELVEAFNEYGKDVTLIDVANRIMPVYYDQEFTDLMQEKMTKAGVKLSLGAKVIEFKGENGKVTQVVTDKGNIDVDYVIFSVGVRPQSAILEGICDLDDRKAIVTNDFMQTTNPDIYAIGDCAQVYNKAMNKNVPIQLATTAVRTGVIAAFNVIKGNGLKSPGFTGANGISVFGLHMASVGISVEAAKRMGYDIDFINFKDLDRPEFMSTANEVLFKVVWDKKTRKIIGAQVASEKNH…
CP001621.209	locus_tag=MMCAP1_0224 protein=probable lipoate-protein ligase A protein_id=ACU79170.1 location=283915..284919 gbkey=CDS	1133.2	1075.9	1276.2	903.7	936.3	883.8	3	3	760.938	903.481	978.105	1639.81	1672.76	1582.35	MMCAP1_0224	MINLLISKYHDPAMNLAIEEYLTYHYKAKEPIVFFWQNANTIVVGRNQNAFAEINLEAAQKDNVKIVKRNTGGGTVYQDLGNVCYSLIVDNSTDDVDYQKALQPIITYLNQKNINAIFSGRNDMVIDGYKVSGNAQLKTNEKTLVHGTLLFDVDLSKMPKYLVVDPEKLKHQQIRSKPARVKNIKEFFKDINIDIDLNTFINDVVSSYVQNEKIKWIELTDQEKQYIQSRKETKFDQWDWTFGKNTVFSLVKKQYLESKGFITLNLDVDNGVITNIKIYGDFLGTQGTEKLEAKLIGVKFNKKDVENILNQFDLEAIFAKNFTSDDITNLLFKD
CP001621.210	gene=pdhA locus_tag=MMCAP1_0225 protein=pyruvate dehydrogenase (acetyl-transferring) E1 component, alpha subunit protein_id=ACU79526.1 location=284963..286075 gbkey=CDS	19638.8	18627.6	19434.2	4665.6	4797.7	4373.7	3	3	13187.4	15642.4	14894.8	8465.95	8571.39	7830.64	MMCAP1_0225	MTYLGKFDPLKNEKVCVLDKDGKVINPKLMPKISDQEVLEAYKIMHLSRRQDIYQNTMQRQGRLLSFLSSTGQEACEVAYINALNKKTDHFVSGYRNNAGWLAMGQLIRNIMLYWIGNEAGGKAPEGVNCLPPNIVIGSQYSQATGIAFAEKYKKTGGVVVTTTGDGGSSEGETYEAMNFAKLHEVPCVFVIENNKWAISTARSEQTKSINFAVKGIATGIPSIIVDGNDYLACIGVFKEVVEYVRKGNGPVLVECDTYRLGAHSSSDNPDVYRPKGEFEEMSKFDPLIRLKQYLIDKKVWSDEQEEKLVAEHDKLVADEFAWVEQNKNYDLIDIFKYQYDKMDIFLEEQYKEAKEFFEKYPESKEGGHH
CP001621.211	locus_tag=MMCAP1_0226 protein=pyruvate dehydrogenase E1 component beta subunit protein_id=ACU79371.1 location=286075..287064 gbkey=CDS	36562.2	27466.4	32377.6	3941	3881.6	3852.1	3	3	24551.3	23064.8	24814.8	7151.13	6934.72	6896.77	MMCAP1_0226	MAIINNIKAVTDALDCAMQRDPNVIVFGEDVGTEGGVFRATQGLAVKFGNDRCFNAPISEAMFAGVGLGMAMNGMKPVVEMQFEGLGLASLQNIFTNISRMRNRTRGKYTAPMVIRTPMGGGIRALEHHSEALEAVFAHIPGVQIVCPSTPYDTKGLILAAIDSPDPVIVVEPTKLYRAFKQEVPDEHYIVPIGEAYKIQEGNDLTVVTYGAQTVDCQKAIALLKETHPNATIDLIDLRSIKPWDKKMVVESVKKTGRLLVVHEAVKSFSVSAEIITTVNEECFEYIKAPLSRCTGYDVITPFDRGEGYFQVNPKKVLVKMQELLDFKF
CP001621.212	gene=pdhC locus_tag=MMCAP1_0227 protein=dihydrolipoamide acetyltransferase component of pyruvate dehydrogenase complex protein_id=ACU79802.1 location=287093..288418 gbkey=CDS	11671.8	9353.7	10918.6	2653.5	2651.5	2730.5	3	3	7837.55	7854.72	8368.23	4814.9	4737.07	4888.67	MMCAP1_0227	MFKVKFADIGEGLTEGTVAEVLVKVGDVVKEGQSLYFVETDKVNSEIPAPVAGKIAVINIKAGQEIKVGDVVMEIDEGSGASVASEPKAEAKQEAKVEVVEENASVVGATPVSNDLIVRKQASTVTKSSTIKATPLARKVAADLNIDLSLVTPTGPNQRILVADIKNYHSSSAQPASQPAPTPTLVASQPAPAPTPAITPAIKVVEPSAPLSWDEVPMNGVRKATVKAMTKSHTEIAAFTGMKNTDITETHKMRTELKDHAAASGIKLTYLAFIIKAVAKSLRDMPNINVRGDFANNKIQFMHNINIGIAVDTPNGLMVPVIKGADHLSVFEIAIKISELANKAKDGKLTRAEMTEATFTVSNFGSVGLDYATPIINSPESAILGVGTMSQTPLYINGE…
CP001621.213	gene=lpdA locus_tag=MMCAP1_0228 protein=dihydrolipoyl dehydrogenase protein_id=ACU79705.1 location=288437..290326 gbkey=CDS	11771.9	9885.3	10955.6	1209.1	1284.6	1263	3	3	7904.77	8301.13	8396.59	2193.97	2295.02	2261.27	MMCAP1_0228	MFKVKFADIGEGLTEGTVAEVLVKVGDVVKEGQPLYFVETDKVNSEIPSPVAGKIAVINISTGQEIKVGDVVIEIDDGTSSSTTEPKVEVVEENASVVGATPVSNDVLPSRAPKPKAETKKTEQVEENASVVGATPVSNDVLPSRAPKPKAEAPKVDVQIEDTFDVCVVGAGIGGYVTAIKSAQLGLKTLIIEKEYYGGVCLNVGCIPTKTLLKTSHVYHDIMHKAKELGIVLQNTEKVVIDWAQVLQRKNGVVKKLTGGVKYLLDKNKVTQIKGEAVALDKNTISVNNKNYRVNNLIIASGSTPNHLPLPGFDQGRKDGIIIDSTRILSVPKIPETLVVIGGGVIGIEFSCLFASLGTKVTVLQGLPTILEMLDKDIIDAMTKELKNRYNIEVITNAS…
CP001621.214	gene=pta locus_tag=MMCAP1_0229 protein=phosphate acetyltransferase protein_id=ACU79211.1 location=290348..291316 gbkey=CDS	3008.1	2715.8	2584.4	1626.2	1417.3	1462.2	3	3	2019.92	2280.58	1980.74	2950.82	2532.09	2617.91	MMCAP1_0229	MYTLEEIKNQLVLKSEKKSIVFPEGESEIIQSVAKTLVDEKLGLPILLFKSSKEVPSEIKNNSSIKTICLDEFDTKEFSEEFVKLRKGKATIEVAHQVMQLPNYVGAMLVKLNQADCMLSGLNNTTADTIRPALQIIGTKPGYNIASSIFIMSKGDENYIFTDCALNIKPTSEQLVEITQMAVDFAKTLNVKNVEAALLSYSTNGSGKGEDVDRVHKAVEILKSSQNDYVCEGEIQFDAAFDKKTRDKKFKNCLLTKQTPDIFVFPDINAGNIGYKIAQRMGGFEAIGPFVLGLNQPVNDLSRGATFIDVLNTAIMTLHLSY
CP001621.215	gene=ackA locus_tag=MMCAP1_0230 protein=acetate kinase protein_id=ACU79109.1 location=291329..292510 gbkey=CDS	5610.3	4546.3	5126.2	1278.7	1255.2	1267.1	3	3	3767.29	3817.73	3928.82	2320.26	2242.49	2268.61	MMCAP1_0230	MILVINSGSSSIKFKLFDTSKTIEPILDGLAERIGIDGFLKFEHNNQKYKFEDTLPDHEHAIQLILNKLLELKIISNIDEINGVGFRVVHGGEISHSSIITDEILSKIQDSVKLAPLHNPAAIIAIKAVKKLMPNTNMVACFDTAFHQTMPEVNYLYTVPYKWYEEFGVRKYGFHGISYEYIVNKSSEILNKKKENLNLIVCHLGNGASISCIKDGKSYDTSMGLTPLAGLMMGTRSGDIDVSICEYIAKQTNTDIFTITQTLNKQSGLLGLSQVSADMRDVLEQYDKNDKKAVIAVEKYVQIVADFIVKYANYLDSIDAVVFTAGIGENADVIRDLICKKVKLLDLQIDQDKNQAKYSDYKLISSEESKIPVYAIRTNEEKMICLDTLNLIK
CP001621.216	locus_tag=MMCAP1_0231 protein=putative liporotein protein_id=ACU79448.1 location=292579..294534 gbkey=CDS	6.9	15	6.9	61.9	64.6	68	3	3	4.63332	12.5962	5.2883	112.32	115.412	121.747	MMCAP1_0231	MKKSLKYLSSLSLILVPLVTISCTHTNKIKPGFIPTINSSNKKDIIDLNNQLEEFKSILENNPKIDKNLKDKIIKKTKEINSKSISSNKLSNINNILSELKNSSNDFNSDNLLSFLKKVKELLLELEINELVNEIDQHINKITNDKQNNQLIINADSNVEDKFIEGSVYSPANHSYPEFVNKFTTVSAEEIYKELYDRTFSIKFLTKLNNGGSLSNGTGTGWLLDYHKYNNENKYKLFLATNLHVLSEFSNSLTEEQNKEFNYYDPSNNKVIAIGLGKAENVNDFSSKNNKTDFQNKITKYYLSNQDFKSYSLIDYSNSNSELTTAISEPKIVFGAVDFMNRKAVEKYDDAIKQSAEGYYNYKKANLNDDEKIAWEDYFKTKNIPIMVDFAVFEIDVDL…
CP001621.217	gene=coaD locus_tag=MMCAP1_0232 protein=pantetheine-phosphate adenylyltransferase protein_id=ACU79437.1 location=294544..294966 gbkey=CDS	12.6	11.5	11.6	28.5	33.1	29.7	3	3	8.46084	9.65706	8.89047	51.7146	59.1352	53.1747	MMCAP1_0232	MKTAIYPGSFNPFHKGHLNILKKAILLFDKVYVVVSKNVNKSLEPDLQSRVENIKNLIKDFNNVEIIINENKLTTTIAKELNASFIIRGLRSQADFEYEIKYYDGFKSLDPNIEVVYFISDYDKRSLSSTILKEIEFYKK
CP001621.218	gene=ptsP locus_tag=MMCAP1_0233 protein=phosphoenolpyruvate-protein phosphotransferase protein_id=ACU79654.1 location=295060..296781 gbkey=CDS	3286	2528.3	2885.5	549	513.9	610.3	3	3	2206.53	2123.13	2211.51	996.186	918.114	1092.68	MMCAP1_0233	MSKQIKGIAASDGISLAKALVIKEIKLDVQKQLIDDVDQQIAKLEQAINQTITDLKKIQKITLEKLGEEKAAIFDAHQDIANDPAIKEEVVQLIKTEKVNAEYALFIVSNNYFEMFSQLEDPYFKERSADIKDVSSRIISHILGLEIHDLSTIDKEVIIISDDLTPSQTAQLDKKFVKGFLTNVGGRTSHAAIMARSLEIPAILGLKNITELVKTDDLIALDGSSGIVELDLNDNDIKNYQTKVKQYLELKDQLKKFKDKPSLTKDKIKKLIEANIGSTNDIQSVLDSGAEGIGLFRTEFLYMNNDHFPTEEEQFEAYKKVVSQIDHLVVFRTLDIGGDKKLSYFKFDEEMNPFLGYRAIRFTLDRKDIFKDQIRALLRASAFGKLGIMFPMIATIDEF…
CP001621.219	locus_tag=MMCAP1_0234 protein=PTS system glucose-specific eiicba component protein_id=ACU79139.1 location=296863..297327 gbkey=CDS	20249.7	14654	17414.8	11678	12046.1	11927	3	3	13597.6	12305.6	13347.1	21190.3	21521.1	21354	MMCAP1_0234	MWFFNKNLKVLAPCDGKIITLDEVEDDVFRERMLGDGFAIYPTSNDFHAPVSGKLVTAFPTKHAFGIQTKNGVEILLHIGLDTVSLDGNGFESYVIQDQEVNAGDKLVTVDLQEVSKKVPSIKSPIIFTNNGGKTLEIVKMGEVKKGDVVAILK
CP001621.221	locus_tag=MMCAP1_0236 protein=dihydroxyacetone kinase, L subunit protein_id=ACU79781.1 location=297691..298317 gbkey=CDS	595	660.5	576.9	385.7	386.4	383.1	3	3	399.539	554.651	442.148	699.871	690.328	685.899	MMCAP1_0236	MSLKIEAVKQILLKIAEVIDNNKEELTKLDQIIGDGDHGHNLSRGFLKVKEDLENNLYTDISSMFKKVGMVLVSNVGGASGPLYGTAFLKTSMSLNDKTEMNIDDFSVCLNDAVSGIKLRGKANIGDKTMVDVLEPVSDLIKELISKNESAKEILNKAVQLAYLKVEETKNIIAKKGRASYLGQRSVGHIDPGSYSSYLILKCISENI
CP001621.222	locus_tag=MMCAP1_0237 protein=dihydroxyacetone kinase, phosphotransfer subunit protein_id=ACU79680.1 location=298325..298720 gbkey=CDS	652.1	592.1	626.3	76.3	72.2	79.3	3	3	437.882	497.213	480.009	138.45	128.99	141.978	MMCAP1_0237	MVGIVVISHSNKIANGVVDLAKQMANEVKIIPAGGTKDNLIGTDIDLIIDAINKAWDPNDGVILLFDLGSALMNAQMAIEMLEPDKQNKIKIIDAALVEGTILAAINSSMNKNIDQIQQELINLKLNKIEE
CP001621.223	gene=rpsD locus_tag=MMCAP1_0238 protein=ribosomal protein S4 protein_id=ACU79812.1 location=complement(298765..299391) gbkey=CDS	667.3	1053.1	867.9	2244.1	2380.1	2397.7	3	3	448.089	884.335	665.176	4072.03	4252.2	4292.82	MMCAP1_0238	MSRFIGSTFKKSRRFGFSILETGKEFSKGKKRITTPGQHGKERAKVKVSEYGQQLQEKQKVKFMYGLSERQFRNTFAKAKKMQGILGTNFLVLLESRLDNIVYRLGFSATRQGARQLVNHGHILVNGKKVDIPSYLLSVGDLVEVKASMKKNEKVLEALQNNEATLEFVKVNKNEVKGEFVRLPERTELSSEISESLIVEWYNRLIKK
CP001621.224	locus_tag=MMCAP1_0239 protein=conserved hypothetical protein protein_id=ACU79062.1 location=299646..301433 gbkey=CDS	27.6	25.9	24	28	30.9	30.6	3	3	18.5333	21.7494	18.3941	50.8073	55.2048	54.786	MMCAP1_0239	MWFELMLIITKLSETKAINIVFLTIFLLAFFCSLFTIFKLYVYRNTLKKLHFTFLNIEKTLKHPLANRLVRMQFIVTNSNNQNLSKALEIWKIKYNQIYNVELDILIKQTKEHFDLNSYSKKILFRVLSIKNFYRTRKLYKTSKAIYQKVNLMYSETQQVTNIEFLLRDYRIILQNHINDLFDIVFKEQENNELNIDKKIINNYQESIFKKMIVCEYYIKIGNFKEAFSKLNLLSNNVIEYIKFLDDHYKITKFLEFNGILDSKLQEIKNKVQLDVNQKNNQLIKYQINLLEQQFIDQKQAVEKLLFHGKNNQAFLIIETLIKNIQNLDVILKYDQQILSLFETNVKNIRTILLSFNTELLKTEELINFNNNLNNDISDIKIQFDQLKTSFNNITTEFD…
CP001621.225	gene=thiI locus_tag=MMCAP1_0240 protein=thiamine biosynthesis/tRNA modification protein ThiI protein_id=ACU79185.1 location=301441..302628 gbkey=CDS	147.6	144.1	145.9	98.6	108.3	118.5	3	3	99.1127	121.007	111.821	178.914	193.485	212.161	MMCAP1_0240	MKYILIRYGELTLKGNNRFQFIDKLISNIKFKLKQFDKEDIKFIKDHNSLTLEIKDELETQIVEQLKTVFGIYSISIINYVNKDLEQIKKTVLQIAKNSKTKTFKLEVSRKDKSFNYTSIELKQILATEILKNTNHLSVDVHNPELVIEIVVKKDHVDVFDNRIDGLKGLPVGISDKGLCLLSGGIDSPVSAFLTLKRGMQVDFIHFMTPPHTSYQALDKVFNLAKKIAKYNLSNFKLHICDFNLLLQELQHLIDPSYKITIMRRMFLRIANIIAKNNNNKAIITGESLGQVASQTIQSINVINNVSDLPILRPVITYDKEEIIKIAKFIDTYETSILPFDDVCSMFVPKDPIIKPKLDIATKLEENIYWKELLEETIKNNIKTFVYKNGEFAQE
CP001621.226	locus_tag=MMCAP1_0241 protein=peptidase, S41 family protein_id=ACU79406.1 location=302759..304714 gbkey=CDS	25.2	19	21.4	867.2	907.9	856.2	3	3	16.9217	15.9551	16.4014	1573.58	1622.02	1532.93	MMCAP1_0241	MKLVKKIGFLSLSAISILGPLAMINNLTTDNNLLITKRFLSSSNSNVGLKSYDYINLINNKYIPTKINLHDHNGIAYIGVKEFLKSLDGLISFSKIKVRPYQNANFYKEKEISYNYKNNKVVLNSISKYSNNNKTTNYQLEIDSKNKTITVSDNDFFTDIFTFYRRGEEDLNIDFLNTEIVNKNKHIVFDLNKYGIEILNDQNDLYLPLVLINQLFLNQSNVQLYFNGQSVNLFAYSKTLGKVELLKQLKHSYLNNQNHIPAGLKDFQYKYLGFLFDHFYGIKLDKNASYKDLFKKYEKYIKADNTTHYLTSRYLIEQLDDLHSSYLLTGYYNKDLETINKAVLKTTTPRSDRFKDIARRLSAYYDKELNYKNVYTPDRKTSVISFKNFEANSAFKIEE…
CP001621.229	locus_tag=MMCAP1_0244 protein=putative liporotein protein_id=ACU79331.1 location=308882..311149 gbkey=CDS	24.9	19.2	20.3	NaN	NaN	NaN	3	0	16.7202	16.1231	15.5583	0	0	0	MMCAP1_0244	MKKLLYTLSTLAVSVLSVISLIACSNKNNNEPTQLSKLEQLKNEISNLETNVNQYNEQINKTELEKEQLLKEIQKIEQEIKDLKKQENSKKEELNILNNRKNNLNNEIDNLNSQIATIDEASKKDKQKITSLLKQIEQVKTNLDNATNQKNINIEKIQDLETEVQNLKNKTNNLEKELLENKSKKENLIKLQQQTETESKKSKDMLDKLDKQKTDLTIQKTELEKQIQVEISQDGKNDQELSKLQSEWKDVLENIKNLENENNKNQDQISKLDKTNRNYVEKLKELEKNKIDTESKLTQLNKQKDDLEKQIETRQNEFISKNNKAQIAQNSLNEINSKIRKTDESINDIKPKYDQELEKSKQLQKQIENVEQGIKLQEEEIKRLILNKDEKQKEVDNLK…
CP001621.230	locus_tag=MMCAP1_0245 protein=putative membrane protein protein_id=ACU79286.1 location=311623..313764 gbkey=CDS	326.8	485.9	364	340.7	349	328.7	3	3	219.445	408.032	278.977	618.216	623.51	588.502	MMCAP1_0245	MNFIIVFSQSVSFGQQAVAFLKGTSLLMLVLVFFTIFSYYVPKGKRAMSGLSGAVCATFLIEVFNFWVLGRIPVIGDFTRVIGSVAGTLAAPACTILVIILMGGNPLFAILCGTAVFGVGLSVDVDGISKSIAKTLINTNTPDGQKLLAEDNAIRVIAEWVKGNTLQNEMQKTFETIKSNLVINEQKDILKTIFSTQYMPNFAMHLRTTVGAFNILAGLVAGYTMYWALLLLQKYAPDGLDLIIALLIIAPLTALTAKFGANVVAPLLKGIGSSIEVAINLSPIPMAIVVGGFLTVVGTSPLSSMALAVGLGLQGSAMAVGSVSAMGSSFMNGVLFARMKYGEKKQTIACSIEPLSQADIISMNPVSVYITNFIGAAATGILVIVYGQNILNIEQTVFM…
CP001621.231	locus_tag=MMCAP1_0246 protein=E1-E2 ATPase subfamily, putative protein_id=ACU79389.1 location=complement(313791..316697) gbkey=CDS	97.8	151.9	125.3	122.2	144	123	3	3	65.6722	127.557	96.0324	221.738	257.265	220.218	MMCAP1_0246	MDNLEQKTIHEVQQELNTNIKTGLSNQTASELLIKNGKNELAKNKQTPAILIFLKSLIQPIQIVLFIAAIISVIAPLISSKHFEVKFDDFIDFIVIMGVILLDATLETVQQIKARKSVDALKSLSKPSAVVLRDSIVKEIDASELVVGDIVILEAGKYVPADLRLLESSDCMVEESILTGESVPVEKSSRPIKQTNILAEKKNICFMSTFVTSGRAIGVVIKTGIDTEIGKISKTISDNEEQVTPLEKKMNRFSYLISILAIIISIFVFISFMISSNKSNWATYLMISITLAIGVIPESLSAIVSIALSFATKRMAKNNVIVKKLESIETLGSVNVICTDKTGTLTQNKMAIKKLIWNNEIILADEFINKTKNEQAKDLFLKSLVLPNDSITENDERIG…
CP001621.232	gene=ysxC locus_tag=MMCAP1_0247 protein=ribosome biogenesis GTP-binding protein YsxC protein_id=ACU79500.1 location=complement(316706..317296) gbkey=CDS	99.8	84.7	85.4	54.6	53.1	45.5	3	3	67.0152	71.1264	65.4523	99.0743	94.8664	81.4629	MMCAP1_0247	MIKQASFITSAANKSNWINDDVSEICLIGRSNVGKSSFINSLTNNNKLAKISNTPGKTRLLNFFEINKGEYRLVDAPGYGYAKVDDNLKIQFAKMMEEYFINRKNLKGVFLLLDLRHKPSNDDIMMYQFLKHYNIPVVIIGTKLDKLKKSEYIKNEKMIKETINFYQEDDFIKISNLDKTNIIKCYELIDKLLGSK
CP001621.234	locus_tag=MMCAP1_0249 protein=conserved hypothetical protein protein_id=ACU79594.1 location=complement(317852..318430) gbkey=CDS	4.7	5.1	5	29.6	34.8	33.6	3	3	3.15603	4.2827	3.8321	53.7106	62.1724	60.1572	MMCAP1_0249	MSSKLIAIIIFIVIYLIFLLITFILTYFYQIKNKDFIEFNKKYLNEWNKYKFDNKNSSLNEIDFKYQLPENEIGLFQKELLISGINQKIKDYKDYFDDDYLVLKKSLSLYQTTSYDFKQVKLYLTNLHLVIDDNNQFYKYKIIEIKSCSICVIRDKNLLQKGCVLKTNDQSLTILGDVFLLVLSIKKLKKEF
CP001621.235	locus_tag=MMCAP1_0250 protein=conserved hypothetical protein protein_id=ACU79840.1 location=complement(318433..319122) gbkey=CDS	707.9	543.9	590	47.8	45.2	52.4	3	3	475.351	456.737	452.188	86.7354	80.7526	93.8166	MMCAP1_0250	MNKKEIFNTDFFESGLAYILTNLDFIQEELEQEKLQTSLVEKLITDFEDVEDYETWDLLTNNLIQSEDKILEEIQKIKDSTKFNLLNSYFLAKNLAIYLKSNSFLIEQINKLQTNSPDDLSEDKKEEFINNLKQEILKNNSELYKQNERLFKEIFDKKVEFKKIYQLLIKETEFEDFNYANELLFNMLNNNFKFNNKQDLLKLEVLNNAQSLIDFLTFYESSLFDDEKE
CP001621.236	locus_tag=MMCAP1_0251 protein=conserved hypothetical protein protein_id=ACU79113.1 location=319204..319896 gbkey=CDS	38.1	36.8	44	37.2	47	36.3	3	3	25.584	30.9026	33.7225	67.5012	83.9684	64.9912	MMCAP1_0251	MIEIYRLRELKSKDLNSYSHINPWWNKKINKLIFKLKKFISHFNLNPNDYLDFNTIEQVSLDKFFRSTNNYLHFFNPKLSHILTNKKLLAKFQNQIRTYIRLVGFNFAILAMIDFYNQLDDDQILNKKELVLMISNKTLKDKFQRFTIEVLKLIPNQYKSNLKDLYNENINNQLFNSTEFVRWTNKYVTRLYKTKKIKELDYLKMVYYCILENEFNHSFNLLIKEFINRL
CP001621.237	locus_tag=MMCAP1_0252 protein=oxidoreductase protein_id=ACU79575.1 location=complement(319897..320619) gbkey=CDS	3059.4	1994.5	2537.3	282.2	269.9	262.2	3	3	2054.37	1674.87	1944.64	512.065	482.193	469.441	MMCAP1_0252	MKKLVVITGASSGIGLACAKYFSNKGHPLLILARRKELLDDLNLPNTLTARVDVRDFNQLDQAIKQAENIYGPVDLLINNAGIMILEKYQDQKLEDKYNMIDINIKGVINGMDAVLKSMLKQNHGTIVNISSVAARYTYTDHSVYCGSKYAINAITEQLRRELSHTNIRFTLIEPAIVNTNLLNSTTNKQVKDDYQKSIDEINGGLKPEQIAQTIYYVYSLPDDVMIPELMIAHTNESEV
CP001621.238	locus_tag=MMCAP1_0253 protein=transcription elongation factor GreA protein_id=ACU79445.1 location=complement(320664..321137) gbkey=CDS	7765.6	5654.1	6477.1	1056.3	1104.7	1110.2	3	3	5214.56	4748	4964.18	1916.71	1973.61	1987.69	MMCAP1_0253	MSKEIILTQEGLEELKAELKYLLEVVRPKVIEELVEARNQGDLSENADYDAARNRQAEVEARIKEVETLINRAKVIDDSKTHSTGEVKIGSTVQFVSSLDNKLKEIKIVGAIEADPFSNLISNESPIAKAIIGKKVNTTVEIKDISKPYKITIKSIK
CP001621.239	gene=uvrC locus_tag=MMCAP1_0254 protein=excinuclease ABC subunit C protein_id=ACU79651.1 location=complement(321260..323014) gbkey=CDS	108.5	88.1	88.2	10.1	9.4	13.4	3	3	72.8572	73.9815	67.5983	18.3269	16.7937	23.9913	MMCAP1_0254	MSLKQQVDLLPNKPGCYLFFNKDNDVIYVGKAKNLKKRVSTYFNKAYNIKTTRLVREITDLKYFIVDNEKESLLLEKNLIKKYHPKYNVLLNDDKTYPYIIITNQKDPMYKYVRKYDKKALKNYGPLPIGSNARSILLTLQRLFPLRMCQGNLNKPCLYYHLNQCSGACFKQVDLSYYEYQIKQVDKFFKGEINQVKQTLIKQMQKASDNLQFEQAQRIKDQITSLDFITAKQNVDIVTNKNIDVINYEINQDKICFVMLFYRLGQLTYKDEYIQNYEGQNLSELFNSYLQQIYQKNIYPDVLLIPNEIELLDLDQNLLEFSSYSLNKQDDVFIKLAKQNAIDSLNKSVISHNVNSGDEIEILEQLKQISNASKYLKRIEIFDISNIYNQFITGACIVY…
CP001621.24	gene=rpsR locus_tag=MMCAP1_0025 protein=ribosomal protein S18 protein_id=ACU79669.1 location=complement(33145..33372) gbkey=CDS	2614.5	3194.2	3212.1	2715.9	2814	3110.2	3	3	1755.62	2682.31	2461.82	4928.13	5027.39	5568.48	MMCAP1_0025	MQVKKIKKRKKVNFFQKNNIKYIDYKDIELLKKFISPNGQILPRRITGTSPKDQRQLALAIKRARQMALLPYVIE
CP001621.240	locus_tag=MMCAP1_0255 protein=conserved hypothetical protein protein_id=ACU79251.1 location=complement(323024..324085) gbkey=CDS	73.9	92.6	62.6	815.3	790.8	803.8	3	3	49.6235	77.7603	47.9779	1479.4	1412.81	1439.12	MMCAP1_0255	MKKIKKDPNFKSKMFLIYKTDFKKTKIIAILMLVFLIISMFRLTLVGQFLDDLLFSFLFGWFKYLLYFWLFFINFCLFKKLLISVKWKQFLKTSFFIMILASFLTLNFLIIQFVNNQTKTNNFNIYALWQNDILLQVIKFYDYHWYQNSIFLIDFKNWINYFFNTNTYFNLYLFGGFISYLVCGIIWYTTLPAAYLTLVILLIINLIWLKTNDPFYLFKNKKNSVKTTTNLNNKIITNNQTNDQNLVIFENKLDDDLKQPVYKNEENNLLTNLENVFLDTNFIDKMLFLKLEQTNFNKDEIFENKNKTNITDQFKQNHKSGILTDSEISPFKRNKPVKKISDNDFFNELFDEK
CP001621.242	locus_tag=MMCAP1_0257 protein=hydrolase protein_id=ACU79206.1 location=complement(325879..327630) gbkey=CDS	2047.6	1831.1	1931.9	269.3	281.7	284	3	3	1374.95	1537.66	1480.65	488.658	503.275	508.471	MMCAP1_0257	MPDIKFTALGGQDERGKNLYVLEIDNDFFILDAGVKYPEKDILGIDTVIPKFDYIKQNKKKIKGIFLTNPSAYNMGAVPYLLKEIEAPIYCNEITELIAKIKFQKLRLKNKDHILKVVHDKDILKIGNTKVEIFRTTSSSPQSFGYVFHTELGSIVYAGDYIIDGKEQSYFSTDYTHLSQIAKNGVLALISDAEFASRKDFTVPNHKIDKYILAPFKEKKTKIIVAIFEEDIHKLSQICMAAKENNRKIAVYGRTMDAVLRSNLIHENLVIKPEDLMSIQEYVNSDNGVLIISGTGDDLYSKLAKIATSNDSLVEFTEKDLIILTNTPVAGVEKRHAQILDELARTDARLLALSDKNIWSMRASYEDIKMLTSILNPKYFIPVKALYKDFLNAEKAAIE…
CP001621.243	locus_tag=MMCAP1_0258 protein=oxidoreductase protein_id=ACU79338.1 location=complement(327756..328475) gbkey=CDS	2756.8	2040.9	2238.7	276.9	266.3	302.2	3	3	1851.18	1713.83	1715.78	502.448	475.761	541.057	MMCAP1_0258	MKPLVVITGASSGIGLACAKYFSNKGYPLLILARRKEILDNLNLPNTITAKVDVRDFNQLNDAVKKAESIYGPVDLLINNAGIMPMDQYVDQSLEDKYNTLDVNIKGVINGMDAVLKSMLKQNHGTIINISSVAGRYTYADHSIYNGSKFAVNAITEQVRRELSDTNIRFSLIEPAIVDTNLLSTTKNQKILDSYIARKNSLNGGLKPEQLAEVIYYIYSLPQDVVIPELMISHTNQKV
CP001621.244	locus_tag=MMCAP1_0259 protein=NAD(+)/nadh kinase, putative protein_id=ACU79819.1 location=complement(328487..329284) gbkey=CDS	430.8	334.5	383.4	92.5	97.4	122.2	3	3	289.28	280.895	293.845	167.846	174.011	218.786	MMCAP1_0259	MKYSFITNKYEESSDIVDELLNILKNTDFKKDQNNPDICFVIGGDGTFLYAVHKYQSILDKLIFIPIKFGGIGFYTNKNRVDDLKKIDLNKIIEQPNITELGLIEVNYDDQKVYAINEIKITNQVRPLNLDIYINNEFLEQFKGTGLVFSTPSGSTGFMKSANGAIIYPVVSLFEMQELMPISTNKFRTLNAPIIFSDNEHITLKLEDLNNVTLSADTYEYQFKNKELLIKLSRKKIKLLNLNKDKFNKIKILRDIFVLNDKTKN
CP001621.245	gene=valS locus_tag=MMCAP1_0260 protein=valine--tRNA ligase protein_id=ACU79108.1 location=complement(329395..332013) gbkey=CDS	278.7	254.7	259	89	99.8	89.1	3	3	187.146	213.883	198.503	161.495	178.299	159.524	MMCAP1_0260	MKKQLNPKYDHLQVEKDKYQYWLDKNLFKADINSNKPKFSIILPPPNVTGKLHIGHAWDTSLQDAIIRFKKLTGYDTLFLPGMDHSGISTQVKVEAKLKQQGIDKNKLGREKFLLEAWKWKEEYANIIRKQWAKLGLSLDYSTEKFTLDEDINQIVKEIFVKFYNDQIIYKDKQIVNWDPEQKTAISNVEVIYKETQSKMYYFKYMLEDSNEYLTVATTRPETMFVDQCLVVNPNDSRYQKYINKKVINPVNKQVIPIISDEYVDIEFGTGVMKCTPAHDLNDYHLAIKHNLKMPICLNIDGSVNQLGGKYQGLDRFVARKEIIKNAINEDLFVKEEDIINQVGFSERSNAIVEPYLSDQWFVKMDKFKNMVIDLQNSDNKINFYPNRFSDVLNRWMTN…
CP001621.246	locus_tag=MMCAP1_0261 protein=thiamine diphosphokinase protein_id=ACU79658.1 location=complement(332100..332726) gbkey=CDS	443.9	391	423.8	213.2	240.9	203.3	3	3	298.077	328.34	324.809	386.861	430.383	363.987	MMCAP1_0261	MNYKTILIVTAKTNLNLEIFNNDSTYVIGVERGCLDLISRNMKIDYAIGDFDKVTDQELELIKSKIKNVEIWSPEKDYFDGELAILKGLEASKNAKIIFIANATKRYDKNYSIFHFIFKYDLTFINDDSILFRFDKGTNILKFEDYQDYTYVSFIAKDNTKITIKDLKYECENLSLSAYSNSCLSNAFLPYKDGIIWSNNPIICILTK
CP001621.247	locus_tag=MMCAP1_0262 protein=ribulose-phosphate 3-epimerase protein_id=ACU79197.1 location=complement(332716..333393) gbkey=CDS	954.9	737.2	866.7	350.1	373.1	383.3	3	3	641.211	619.06	664.256	635.273	666.566	686.257	MMCAP1_0262	MKKYIIAPSVLSANFMELKNELELCKKNNINWIHYDVMDFDFVPNLTFGSKILHDIKKNIDINVDVHFMVSVKTKQFEDFFSDYIKAKPEMMTMHIESLKDDNTINKFIDLCKQNNILASLAISPKTDVSLVYPYLDKLDNVLVMSVEPGFGGQKFISSSLEKIQILDQLRNTKNYKYTIEVDGGINEQTSVLVKQAGVDMIVAGSYLFGSDDFTKRAKGLFDEL
CP001621.248	gene=rsgA locus_tag=MMCAP1_0263 protein=ribosome small subunit-dependent GTPase A protein_id=ACU79652.1 location=complement(333395..334297) gbkey=CDS	112.9	91	94.3	22.4	19.3	17.4	3	3	75.8118	76.4167	72.2734	40.6459	34.4806	31.1528	MMCAP1_0263	MQGILIKKDSNESYVFYKNNIYKVYAKGNLKKELKPKVGDIVEFSILEDGNGYIKEIKPRKNSLDRPKIANVDQVLIVTALYEPLFSSFLLNKYIMMLETLKIKPILIFTKVDLLKQTPYYQEVMHKINWYEKMHYEVLIINNKDNLENKKAIIEKLKSFLENKISVFTGQTGAGKSTTLNNFLDMNNQIKTNEISKKLNRGKHTTTSIQLYNLENNIFIADTPGFSAFDLNNIDIEHILYSWETFIPFLNKCKFVDCTHTHESKCEVKKAVAEHLLPTFIYNDYVKVYEELKQNRKNKY
CP001621.249	locus_tag=MMCAP1_0264 protein=serine/threonine protein kinase protein_id=ACU79475.1 location=complement(334307..335209) gbkey=CDS	37.3	90.4	86.2	85.5	92.5	87.4	3	3	25.0468	75.9129	66.0654	155.144	165.257	156.48	MMCAP1_0264	MGFGRFLETNTFAKLSFSKNIVKMKDVFSWQNYYVIVMELIEGADLSKKFNAYNNVLSNKEFLYYFLQITKGLKEIHDNNIIHRDVKPANILITNDSKVRISDFGISKIKSIILDDHHNHISPGTPRYTAPEQFINFESRKDAFYFESDIYSIGVIMYEFLTGSMLYLNYGSNHTSSKEKERTNFQQHILKDITRPREINPNISQALENIIMKCLAKDYKNRYHRFDQIIEDLEQAKQQPDVNIDFPNMWWEDENYLNIKNNNTLKYKYFFKNTNFKYFLFWISIVISLFIIFLIVLILK
CP001621.25	locus_tag=MMCAP1_0026 protein=single-strand binding protein protein_id=ACU79635.1 location=complement(33392..33832) gbkey=CDS	964.3	910.6	953.2	190.5	203.3	153.7	3	3	647.523	764.671	730.552	345.671	363.208	275.183	MMCAP1_0026	MNRVNLVGRITRDLELRVAKNGSKFVFFTVAVSEFSTREEKTNYIPCSAFDKTAENMVKYLSKGSLISVEGRITTRNNQTPDGKFETIVNVLAERVNFLEPSKNRNNMTTEQNDNFTPNQPTQQNSDSSFDDLVVSDDDELSILWE
CP001621.253	locus_tag=MMCAP1_0270 protein=conserved hypothetical protein protein_id=ACU79791.1 location=339225..339641 gbkey=CDS	222	164.1	155.5	129.7	118.3	122.7	3	3	149.072	137.802	119.178	235.347	211.35	219.681	MMCAP1_0270	MKVKVNNLEQTYKIAKKIKKIIQNQKIPFYILLKGDLGAGKTTFTKALLEQFNIKDNITSPSFVIMNQYFIDDLKINHMDAYRLNNDSEIEMYLDEFLDGLNIIEWYENLDLDLNAINKLIIEIKIIDENQRLFFIGE
CP001621.254	locus_tag=MMCAP1_0271 protein=glycoprotease family protein protein_id=ACU79690.1 location=339643..340206 gbkey=CDS	759.3	551.1	694.3	51.2	35.6	31.3	3	3	509.866	462.783	532.125	92.9048	63.6016	56.0393	MMCAP1_0271	MNLFIDTTNWKLIYLLEKDNQIIDSLIILNNKKLSDIAILKLEEFLKNNNLTLNDLKAFYLTIGPGSYTGVRVGLTIVKTLKVLNNNFDVFIINSLLYQAGLNKIISCIDARSNKYYVSVFNNAKQLLEISLIDQDQINNLINQYQDYKLINDYQFDYLKHYLDLKKHFIKIDDDNKLNPLYIKSFI
CP001621.255	locus_tag=MMCAP1_0272 protein=efflux ABC transporter, permease protein protein_id=ACU79667.1 location=complement(340242..345563) gbkey=CDS	26.6	17	8.1	31.4	32.6	34.1	3	3	17.8618	14.2757	6.208	56.9768	58.2419	61.0524	MMCAP1_0272	MSNLFLMFKQGLKWILKFKLQLIIIIFLTFIASSILTISFTTNKRLKTAYDQIVNNSKSQKFDSTYQIVVGNKAKPENGDPLFIPIFDFVNKEYTGFNDEGFNNFNLYFNKFYGKETLLTKVISSDEFKKIWTNQKNKNLFLKDQKDEQVAKNQEDFDFEINDLLFSTMIDLLNKNDQSISNTVISKYTKTNPNWYKHFLKDDKPFTWLEFLNNKELINKLEKEHSEELKIYYYSYYAFESFSQYLFKTIRTFIRHDQWKDQTENIAKIVYEFLFGIEFENNLKHDFQKEYITTNTNKYTTHFNKTVLKTEFEKMNFLNTNKEDTFFYDIIKKGFKGILRPLIVYYSEDDNYIDIQKVSQYSETNELRGFLSGSNVYTQNVDKLPDIFKNNELVDLLVL…
CP001621.256	locus_tag=MMCAP1_0273 protein=hypothetical protein protein_id=ACU79561.1 location=345776..348916 gbkey=CDS	37	24.3	33.3	28.6	29.6	30.5	3	3	24.8453	20.4058	25.5218	51.896	52.8822	54.607	MMCAP1_0273	MKKSIKKAKPWLISLIVMFAFISGFLFFIRSYVDSSKQNYLNKIQSYIDASSYLAKSKILKSVEDLNEDYVNKKLSEQYLEQEFGKDFIWKPDKTDANLKNKVSDIYRTYFGKSIDVIEKDLKLQYRDNNKNLVDITDLKNGEFIPKNIDKITALTRSSEDFLNGFSPSLASLGLSFFQSQALENEDHLNKIKNNNIIKSVVDFINNNQSLIKLLSKIFSTKNVDKSFYKDLTIKQVFNKNINLITSSFTKKTYSDNNNDYFADDVSDLVISDVKNIVLQEWNKDKKNIEILDKFKIIFSKVKDYFLKFDYLKILDNLFRYVQSELYFSMYYVINEQYSNPSQLLNQKIEDKRFDPLINNKLDFSLLINGFSKVLEDKKYTTRLLDFLFKRTDKTKIYF…
CP001621.257	locus_tag=MMCAP1_0274 protein=putative liporotein protein_id=ACU79296.1 location=348931..349545 gbkey=CDS	49.2	83.1	37.4	320.7	263.1	273.5	3	3	33.0376	69.7828	28.6641	581.925	470.044	489.672	MMCAP1_0274	MKKLLTILGSIILITTTSTAVIACKNINQQEVKNKETEQKDKKESIESTDDKQKERANKSENDSKPNEHPQGDQPHNAQPSDLPRKNNEELVKNNKMNFDLIKKYGKEFIDLLTSLGEKAEKISEDPENIKVLTLARELSKAYEDLKKYSNFDTFQSELKQKLNKSETELSDFISNLEKYWNKIVKDYENEREKILKVLEEKGK
CP001621.258	locus_tag=MMCAP1_0275 protein=putative liporotein protein_id=ACU79235.1 location=349685..350206 gbkey=CDS	259.6	354.5	308.5	291.1	270.4	272.8	3	3	174.32	297.689	236.441	528.215	483.086	488.419	MMCAP1_0275	MKKLLTILGSLGLIATTSAAVIACGDKTPQKLSDIKSSEKSIKEDKEKQLKEENVKKIQSDQSDPTNNYSFKRSLEENLKLIKKYGKEAADVIFPRADLIESFRSKEETKDTISLISKIISIYTDFNNYSNVEEFKSKSTKYNLTTKEKELDELVTKYEEQKDNISKLLEKFK
CP001621.259	locus_tag=MMCAP1_0277 protein=putative liporotein protein_id=ACU79682.1 location=351247..351759 gbkey=CDS	48.7	55	61.3	255.8	241.8	241.6	3	3	32.7018	46.1859	46.9816	464.161	431.991	432.559	MMCAP1_0277	MKKLITLSSSIGLTFISSFLVISCKSSKQINTKEMTNITKKDQISDNKKEDIKNDKLKEKNLIIPKKSKDETFELIRKYGKEIADFLFPYSTKLADFRSKPEYKEMLEFTGKITKFYFDMNNSSSLEDFIMKKKLQTKLGVLHSELDQIISKYEKEKDSIWKQLQEISKA
CP001621.26	locus_tag=MMCAP1_0027 protein=30S ribosomal protein S6 protein_id=ACU79234.1 location=complement(33844..34257) gbkey=CDS	8927.3	7798.1	8335.4	3583.1	3963.4	3716.5	3	3	5994.64	6548.41	6388.42	6501.7	7080.86	6653.99	MMCAP1_0027	MIKKYEVMYILDQDVKDTKELVTKLDAILAENGKILESNDLGLLDFTYEINHKKKGFYHVVIVEATTQAIKEFERIAKIDKNVVRTLVLNTENIQNYEQSVVLSKTDMTKYEEEQREKKNFRKPFIKREEAAVKESK
CP001621.260	locus_tag=MMCAP1_0278 protein=PTS system fructose-specific enzyme iiabc component protein_id=ACU79664.1 location=complement(351799..354213) gbkey=CDS	379.3	549.3	471.7	177.8	181.6	182.7	3	3	254.698	461.272	361.52	322.626	324.44	327.105	MMCAP1_0278	MDNYVFNKDYIFLNVNLKTKEEAFEFIASKAKELKIVTSKKALIDGFKLREAENTTGFEDGFAIPHPKDVQQIKKPAVFVLKFTNPIEWNALDNKPIEIAIALLTPQTTDENNSHLTLLSQVAVKLTNQEFKTALKQAKTKKEILNILNSDQNIEIKKENNNLENTKQLKIVAVTSCTVGIAHTYMAEEKLLQQALKQNYQIRVETQGSKGIGTPLTNKEIKEADVVIIATDTAVDLTRFTGKKVYKTKVSNAIKDPEKTINDALKLANIHNQTSQEFETKNIKNQEKVGVLQHILSGISYMVPIIILGGICLAVSLGLAKAIYGADAAPKGFLKYLEAIGGASFTLMIAILGGFIANSIAGRAAIVPAMVGSFIGNNPSNFANWIPGLGQIQTPMGFV…
CP001621.262	locus_tag=MMCAP1_0281 protein=conserved hypothetical protein protein_id=ACU79525.1 location=355212..355892 gbkey=CDS	53.2	62.6	68	438.3	459.1	429.8	3	3	35.7235	52.568	52.1166	795.316	820.211	769.511	MMCAP1_0281	MNKKVDKNIKNQSKNTKSFWSKLMFWKSKNDLTQQNYFENILYPFFITKENEKKNVLDFINKQDIQYFLFYTNSKNWLNILQYGICPVKEIKLKADEEYVVWSFQQKDYSIGLAFDISSRAQFWKWLKDTDIKTDQFLTIAINPNTLYRVTKKDWVWDKSLSMVFINEAIQIECIEWILFRDYDLYKKAEEYLRKTLLNDSIRIYYKNNDQFEQIESNNDNEKATR
CP001621.263	gene=proS locus_tag=MMCAP1_0282 protein=proline--tRNA ligase protein_id=ACU79417.1 location=355873..357297 gbkey=CDS	1427.5	910.7	1133	132.5	128.8	124	3	3	958.559	764.755	868.354	240.427	230.109	222.009	MMCAP1_0282	MKKQLDKITPRNIDFSQWYTDIVLNTKLASYGPVKGTMIFRPYGYRIWELIQKYLDEEFKKINVDNVYFPLLIPESLFNKEKDHIEGFSPEIATVTKVGEKQLEENLFIRPTSEVVMMDYFSNEINSYRDLPLIYNQWCNVMRWEKTTRPFLRTSEFLWQEGHTVHSSYNEAEDFCLKILNIYEKFAKDILLLPVICGKKTEKEKFAGAKDTYTIESLMFDGQALQCGTSHFFADNFTKVYDIKFQNKENKLEHAYSTSWGVSTRLIGALIMTHSDDNGLVLPSKISPIQIQIIQIKNTEQIDQVVEIIKDKLSDYRIDVDNSDKSFGFKISEAEIKGIPIRIEIGPRDLENNQITISRRDQQENKIKIDYKDVKKVVDQMIKDYDLALYNNALENRKN…
CP001621.264	locus_tag=MMCAP1_0283 protein=ribonuclease HI protein_id=ACU79410.1 location=357310..357927 gbkey=CDS	43.8	58.2	46.7	11	NaN	10.4	3	2	29.4115	48.8731	35.7918	19.96	0	18.6201	MMCAP1_0283	MSKKYYAIKKGLKPGIYTTWDEAKKQVENYSNAVYKSFSTLKEAEDFLNDSNKQSDNLNSDKNSCIAYTDGSYNTLDNTFSYGVVVFWKNREFHLSQRFDNQNISSLRNVAGEVLAVKQTIMFCVANKIKKVLICHDYQGVSKWALDQWKANLDFTKEYKEFFNKYKNQVEVEFKWIKSHTNNKYNDLADKLAKNASLEFVLKEV
CP001621.265	locus_tag=MMCAP1_0284 protein=conserved hypothetical protein protein_id=ACU79605.1 location=357929..358816 gbkey=CDS	6	5.8	6.2	70.2	71.9	72.3	3	3	4.02897	4.87052	4.7518	127.381	128.454	129.445	MMCAP1_0284	MKQIDIQTIDNHQIKTYVFDKVKKPIAVLHIISNNLNIIDFYTGFFKLLNEHQIIVVCNSIQNSLAIRNQKKILNHNAKIIIEDFKEVNHFIKKQYKLPIFMFSHSITCVFSKAYAIKYSETINGLILSNFIQFNKTVIFKEMIRLIFIKLFSKNKKPYSLYQDTYTQTFLQEFNQNNEFLSNNLNRYLDLLEDDFISKKFEIISLLDIYKTMCFNLKTKRFSFIRKNLPILLIANDNNFDEEKYYLKSSYKLLKQFLKKDYFIQLNYVNDLKNKMFNNKNQLENQIVTFINKHH
CP001621.266	gene=lepA locus_tag=MMCAP1_0285 protein=GTP-binding protein LepA protein_id=ACU79697.1 location=358840..360642 gbkey=CDS	346.8	333	340.7	108.5	95	93.4	3	3	232.874	279.635	261.119	196.878	169.723	167.223	MMCAP1_0285	MDKSKIRNFSIIAHIDHGKSTLADRILELTNTVEKREMQDQLLDSMDIERERGITIKLNSVQLKYHSKDNQDYIFNLIDTPGHVDFTYEVSRSLAACEGAILVVDASQGVEAQTLANVYLAIDSNLEIIPVINKIDLPSADVDKVKQEIEEIIGLDCSNAPLISAKTGLNVEDVLQAIVERIPSPSDAIDNAPLKALIFDSYYDKYLGVVMSIRLKQGMLRVGDKIKLMSTNAEYEVTYLGIKTPKIVKKDFLEAGEVGWVAASIKTIKDVNVGDTITSVLNPADEPLEGYKKLKPMVYCGIYPIDTNKYQDFKEALEKIELSDSSLVYEPETSQALGFGFRCGFLGLLHMEVIQERLEREYNLELIATAPSVVYKVHLTNKQIIELDNPALLPEAQKI…
CP001621.267	gene=aspS locus_tag=MMCAP1_0287 protein=aspartate--tRNA ligase protein_id=ACU79757.1 location=complement(361491..363215) gbkey=CDS	721.6	545.5	552.1	134.7	130.3	126.8	3	3	484.551	458.081	423.141	244.419	232.789	227.022	MMCAP1_0287	MKRTHTCGELTIDNIDQEVILQGWVKKIRKLGAMVFIDLKDRYGITQLVIEQENIDLINNVKNEYVIEIKGNVVKRKSINKELVTGDIEVIVKELFIINKSELTPFVLENDVNVNEDTRLTYRYLDLRRQVMQNNLIIRAKINHIIRNFLTDLNFLEVETPYFAKSTPEGARDFLVPSRLNKNKFYALPQSPQLFKQLLMISGIDRYYQIVRCFRDEDLRIDRQPEFTQLDLEMSFATSEDVMQISESLIKKILKEVKNFEIKEPLLRLSYKDAIDLYGSDKPDLRYDLKIHTLNDIFKNTNIKFLNNPDLFIRAICIDQLLSKKQLEDLNQQAKQFSFNSIAFIKFEDNNWSGSLASQLTENEKELLIKEFDIKNKATIILNIGKYAEISQLMGAIRI…
CP001621.268	gene=hisS locus_tag=MMCAP1_0288 protein=histidine--tRNA ligase protein_id=ACU79839.1 location=complement(363224..364468) gbkey=CDS	647.7	530.6	497.9	81.3	91.6	89.3	3	3	434.927	445.568	381.601	147.523	163.649	159.882	MMCAP1_0288	MLQKPRGTQDFFLDEAKLWNKVETKLKEILDQFNYSEIRTPMFESKELFIRSIGSTTDIVSKEMYEFVDKKNRSLVLKPEGTASVVRAVIENKLYKEENLPLKVYYISPMFRYERPQNGRYRQFHQLGIEVFGSDSIQQDYEVLNIATKIINQFKLNENIKIYTNFLITGKNREDYILELKKYLSDFKLCNDCNTRLEKNPLRVLDCKIDDKQFKNVPSMQDFLTKEQKTRYDQTLELFKKTNISVIHDDKLVRGLDYYTGFIFEIKYLNNNNEQTIIAGGRYNNLVNEIGNINLAACGFGMGLERFINIIKEQNSSLVNQKTNIDLYTICIDDLAIELNQQILDLTRSIGLKADSNYYHLSLKSALKKADKLNPKYVIILGSNEAKTNEFIIKDQINK…
CP001621.269	gene=rbfA locus_tag=MMCAP1_0289 protein=ribosome-binding factor A protein_id=ACU79121.1 location=364653..365006 gbkey=CDS	1736.3	1600.5	1565.6	93.8	128.8	112.7	3	3	1165.92	1344.01	1199.91	170.205	230.109	201.777	MMCAP1_0289	MANIKTQKRKESLLLRELNLILQREIKSEILKSVSVVETRLSADNSHVKIFYQFIPIPENLTIQSIEEELENKLKEIRMILASKLDWRTVPELTFVYDTSLDRANQIDKILKEDKNK
CP001621.27	locus_tag=MMCAP1_0028 protein=cold-shock DNA-binding domain, putative protein_id=ACU79081.1 location=complement(34462..34671) gbkey=CDS	781.8	682.9	819.9	112.5	115.2	117.1	3	3	524.975	573.462	628.388	204.137	205.812	209.655	MMCAP1_0028	MNTGIVKWFNDEKGFGFITNDSDNKDVFVYFSNINVNGYKTLEQGQKVTYELNKGIKGLEAFNVSITNK
CP001621.270	gene=truB locus_tag=MMCAP1_0290 protein=tRNA pseudouridine synthase B protein_id=ACU79330.1 location=365056..365934 gbkey=CDS	28.4	21.3	21.8	8.2	NaN	11.4	3	2	19.0705	17.8866	16.708	14.8793	0	20.4105	MMCAP1_0290	MQKSGIFILNKPSNISTYQLINQVKKKLNIKKVGHCGTLDLLATGVVICLVNNATKISDYLLNANKAYQVKIKLFTLTDSFDAEGNIIQTQTPFNISLDQINKVISKYNNYTYNQCPPIYSSIKVDGKKLYEYALTNQDVEIKSRKVTIYKTSLLDYDQKNYEIFLDVKCSKGTYIRSLAVDICKDLNTIGYVVYLNRTLSGNFKLENATDLNNISWDHLISINDAIKTNDFKVVNYQNSLEIIQGKKIILNDINDDLVFISDDQINILAVYQKYDNNIFKIKRGGLNNDIY
CP001621.271	locus_tag=MMCAP1_0291 protein=riboflavin kinase protein_id=ACU79333.1 location=365921..366475 gbkey=CDS	146.5	106.3	123.7	188.6	140.4	193.5	3	3	98.374	89.2648	94.8062	342.224	250.833	346.441	MMCAP1_0291	MIYINDSFDKLEKLNTKKAIITIGNFDGFHIFHQKIINQVINIAKQENLTSIVMSFDKKIKNNKTHTNLATKKQKLEFINTKLTDLDYFIDIKVDDSLIKTTKDQFIDILLNKLNVIKIVEGQDFTFGYLSQGNINDLIRVFSKENVIIFKRDNDISSTKIKKLLDENLVDKAQELLGIDLKLK
CP001621.272	locus_tag=MMCAP1_0292 protein=peptidase, S41 family protein_id=ACU79589.1 location=complement(366498..368543) gbkey=CDS	0.4	NaN	0.8	24.2	38.9	28.8	2	3	0.268598	0	0.613136	43.912	69.4973	51.5633	MMCAP1_0292	MKLFLSSLFLLSNTITPSLANSINVVNNQRSTLDLKEYNLNFLAKNIKGTKKKIKLHTHKDVGYVSVKEFLDSIEPLIKRNDVTHEFKDNKTTISLKSSSFSNLKVEFDYKTKDIIVSDNNIFTEILKDKERGEEKLNLEFKGIKNENPIKQFKYHLGDYNIEMLKDQNDIYLPIVLLNQIFLNESNIQVYFNQQDVNVFRFAESLSDFSGIVNLKYSKANMQNSISKELKEFQYKYIGFLLDNYYGIKLKNLTSYKTILSKYESWILSNSNDKHYLATKQLIADLDDPHSAFIMDGYFNKGMEYTKTKIESKSKEHREKIWNEMLHLLAKFDPNKIEYQNNFISSDASIISFKKFEESTASHIKKSLEEAQTKGIKNIIFNVTQNGGGFIGAAYEIMG…
CP001621.273	locus_tag=MMCAP1_0293 protein=putative liporotein protein_id=ACU79459.1 location=complement(368568..370538) gbkey=CDS	124.9	72.6	80.4	22.7	17.3	6.2	3	3	83.8697	60.9655	61.6202	41.1902	30.9075	11.1004	MMCAP1_0293	MKKAAIFLIPTLSLVLVGCTKNKQNNNLVQKQPNITNVYKKTIKDKKQNIENKINKPSFISKPTNTNKKPGFSNLLNDEFEPKNNDKLLDQNVSKKEPKVNHNSMNNNNSTLEVENKLKKITEQNNKFQVFEDTQYSVKSLLNSISISNNKININKYKDINYIGLDQYLNLLKDIIEINSKSKDVFYNNVTYTLTKELKKETNNNITTITLINKYSSKDKNKNSDFTLSEFVKFDYLTQQITISSVNFYNLLNPYENETNLEYKYSKTLDKNPLIIDLNKYNIYIFNKNNQLYLPLLVLNQVFLAESERQIYFNNKDLFVFEVFDLYDHNNNNTKKILSSNKQDTELSNDLKEFSYNYFWFLLDNFYPLKQENQDYKDYLEKYKKDLMSNNLEHFKATN…
CP001621.274	gene=rpsO locus_tag=MMCAP1_0294 protein=ribosomal protein S15 protein_id=ACU79655.1 location=370751..371017 gbkey=CDS	NaN	15.6	NaN	1905.3	1966.9	1928.8	1	3	0	13.1	0	3457.26	3513.99	3453.31	MMCAP1_0294	MVSKEQKLALIKEFGGDEKNTGLAEVQIAILTAEISNLTEHLKMHKKDIPTRRTLLKKVAQRRHFLDYLVKKDVNRYKEVIEKLGIRK
CP001621.275	locus_tag=MMCAP1_0296 protein=conserved hypothetical protein protein_id=ACU79252.1 location=371248..371892 gbkey=CDS	65.5	55.7	60	78.7	75.7	85.7	3	3	43.9829	46.7738	45.9852	142.805	135.243	153.437	MMCAP1_0296	MENQNKEQLLDNIKFNNTRTPFWINLLVQLFTTIGLFLIILFFIGADLQNYSWNHFNKLGKLTYLYLFLICLAYLIIVFLINLLLVLFKVIKSDSFTYSFGLAFVGILIILTGNLFYYWNTTLVIKTILRFVLVIISMVLGVLFGTFISIIFKNKEYQKEEENLAILNAYLNNQIVPTKKQLKQIKKQEYKLSKQKEYEELLKFKENLYKKKTD
CP001621.276	gene=infB locus_tag=MMCAP1_0297 protein=translation initiation factor IF-2 protein_id=ACU79363.1 location=complement(371911..373773) gbkey=CDS	1981.8	1735.7	1779.1	401.5	407.7	405.6	3	3	1330.77	1457.54	1363.54	728.541	728.381	726.183	MMCAP1_0297	MKKQVKNIKKQKAQNQTKNIKKQLKEEVNTGLIDGIFVYTEPLSVIEFATKINKPLTAILKHYFNQGLLLNQNTLLTEEQMGELCLEFGFDFKKETTVTKENILQTLLETVDDEKHLKERPPIVTIMGHVDHGKTTLLDSIKNSNVVASEAGGITQAIGAYQITTKHNKKITFIDTPGHEAFTEMRSRGANVTDIVVLIVAADDGVMPQTEEAIDHAKLANVPIIVFINKIDKPGADPNRVKTELMKYGLVAEEFGGDIPFIEGSAIKKINLDKLQDTIILISELENLKANPDKFASGVVLEAHLDKAKGPVASVLVQQGTLEIKDIMIAGTTFGSIKHIEDEFKHKVLKAEPSKPVVVYGLNQVPKAGDKFVVINDEKMAREISEAQLKKQQEEERRT…
CP001621.277	locus_tag=MMCAP1_0298 protein=ribosomal protein L7A family protein_id=ACU79116.1 location=complement(373795..374094) gbkey=CDS	79	69.5	82.3	17	53.9	49.2	3	3	53.0481	58.3622	63.0764	30.8473	96.2957	88.0873	MMCAP1_0298	MQKDKLLKAIGMAYTSNNLITGFRLLEEIKLKKVKFVILSSDMGLAQQKKYINKCLSRNIECVFNVLTKQELAKACGKDILVAIGLKDDNFIKLIKSNL
CP001621.278	locus_tag=MMCAP1_0299 protein=conserved hypothetical protein protein_id=ACU79232.1 location=complement(374081..374362) gbkey=CDS	873.1	653.2	730.9	209.9	95.9	108.5	3	3	586.282	548.521	560.176	380.873	171.331	194.258	MMCAP1_0299	MTNTMINKNKNLRKDIASNQMLEKHQLIRIVKNKNNEIFIDTTYKANGRGVYLKPDLNSLNIARQKNLIAKSLKSKIDVSIYDQIEEFINAKR
CP001621.279	locus_tag=MMCAP1_0300 protein=transcription elongation factor NusA protein_id=ACU79707.1 location=complement(374343..376097) gbkey=CDS	2822.4	2251.6	2407.9	232.6	217.5	225.2	3	3	1895.23	1890.77	1845.46	422.064	388.577	403.196	MMCAP1_0300	MLNGTELLESIKLIEKEKGISKESIINGLKEGLQKAYERFYDTDAIIKIDINENTGLITMHQELKVVDDEQLDDDWLEITLSKAKLKNPDIQIGDTIYKPIEFSEEFSRMVVNQVRQIFQQKIREAERARIYEQFVSLEGEVVQAKVVGMNRENNYVLDINGTTAYLWKSKTINNEIFQINEIIDVYIEVVEKESKLSQISISRTAPNFLTKLIEREVPEVRMGIVEIKAVSREPGKRSKVAVITHNNNVEPIGAIIGVGGNRINRISDILKGEKIDIIRWDEDQITYLINAMTPVKVISINKIGDEYDIVVPDTQLSLAIGKQGVAAKLIASLLKTKINIFSYSTALKENMDILWNGDTTIQEVETNTYTPKTKATKKEEKPVITTTKKPIKQTTKKE…
CP001621.28	locus_tag=MMCAP1_0029 protein=FMN-dependent NADH-azoreductase protein_id=ACU79164.1 location=34859..35458 gbkey=CDS	26254.6	19319.4	22151.5	3365.6	3656.2	3602.1	3	3	17629.8	16223.4	16977.4	6107.04	6532.03	6449.17	MMCAP1_0029	MSKVLVLKTTAQADEVSNSVALTNRFLEEYKKFNPDDEIIIVDLNKDEVGTSILTSETFSTFYQQEVTKKYINLLKSVDKLVIACPMYNFSTPVTLKSFIDHVSVANETFSYKYSKKGDAIGLITNLKAQILGVQGAPLGWYPWGQHTQYVEGAMRFLGIEFNKTVLLAGVKVAPLLQLTPEQRVETIIDEVIEAARTF
CP001621.280	locus_tag=MMCAP1_0301 protein=conserved hypothetical protein protein_id=ACU79803.1 location=complement(376106..376600) gbkey=CDS	70	49.4	55.2	124.7	124	106.3	3	3	47.0046	41.4834	42.3064	226.274	221.534	190.319	MMCAP1_0301	MKDFESLKFQINELVNKELEVLNLKVYQINNLKEFENDMIQILVEDALQANKPLDFDILIKANDLVSNKIDQIIKTNQKYLLEISSSGIEKQIRNQEELLKALEQWVYVQLNNETKKVKEFEGYVTKYNDQTNTFTFSFFIKGQKKNLDVKFDDIKFIRYAVRF
CP001621.281	locus_tag=MMCAP1_0302 protein=nitroreductase family protein protein_id=ACU79431.1 location=complement(376713..377363) gbkey=CDS	296.4	244.6	248.9	174.8	182.2	169.8	3	3	199.031	205.402	190.762	317.183	325.512	304.009	MMCAP1_0302	MQKEYIKELMLNRKSARDFDLNKSISDQDLEIILTSMRMSPSAFNLMNLRLLIIDRNCSFKTELSPLFYNQLNFINADKVILFVSDKTNKILNHTIDKTVNKMFNETQAEIANKFKKNVVSATSQLAQINELDNWSKTTAHITAGIATIAAASLNIDSCIIGGFNAKVLETFFIQKNYLSEDEQIVLTMSFGYMSKSIKPKPKIRIDENEYITFVK
CP001621.282	gene=polC locus_tag=MMCAP1_0303 protein=DNA polymerase III, alpha subunit, Gram-positive type protein_id=ACU79496.1 location=complement(377376..381824) gbkey=CDS	358.3	141.2	462.1	72.6	76	74.7	3	3	240.597	118.572	354.163	131.736	135.779	133.742	MMCAP1_0303	MQTKILSIFKKIGIELDQTDYIYFKDAILVETPRISQIKNKGYLHIEIKDFLPIDVLKKIEDKLKNNQYFNFKLIIDVKNQEFNKDLLIQYLEFIKMHKSLFNNRSSWKLLDIYNFELINNQLVFLVNSQTIKNEISLELDYCLAKLNQFGFKDLSYLINVNEISLDTLDTKQQINKTYDKPEYEQQIIKPIEKKPSTNNSYKNKRPSLDKPSYNSLLDVEDDAQNIVIQGMVINKEFKLSKTGRKIFYIDITDFQSSIRCMYFAKSDALCEFDDLTEDELKSKEIQQIKENKIQINDWISVKGKTSLSIYDQEQIFYIDDFKKIKKQVDLRIDDAKIKRVELHAHTKMSVMDGVSDPIDYLELISSWNHKAIAFTDHTNVQAFPDIYKALNSINKKRS…
CP001621.283	gene=cdsA locus_tag=MMCAP1_0304 protein=phosphatidate cytidylyltransferase protein_id=ACU79199.1 location=complement(381833..382861) gbkey=CDS	8.9	NaN	NaN	8.1	9.5	7.7	1	3	5.9763	0	0	14.6978	16.9723	13.786	MMCAP1_0304	MNTIITKDENKIKQIKKNLKTRLISATILVLLLGVYLAFPILYYFTNDSSSKLIIAYNVISLVLSSCVLFLSIRELLISFEIKNLDQKLFIEILTVILFWIPFSNIETKIPVYNDLNLKEYWYLTVIAIGLYLFLITFFLMKFCNKNIYQVTKIIFVLLIMVLAFKAINFLGFLKAYNKILYGFSSIIWIWATIILTDSFAYLFGIRFGRHKLAPTISPKKSWEGAIGGFFSSVIINLIWVLTIFFIPWTKSFAPFIGMYDLLLNKDDNLMLITYIFLTVLVSLFTQFGDLIFSYIKRSIDIKDFSNLIPGHGGILDRLDSFYFVFFIIYIILHISLTFNRI
CP001621.284	locus_tag=MMCAP1_0305 protein=peptidase, M24 family protein_id=ACU79075.1 location=complement(383060..384136) gbkey=CDS	13340.3	9339.2	10182.3	1285.6	1329.1	1373.8	3	3	8957.94	7842.54	7803.92	2332.78	2374.52	2459.64	MMCAP1_0305	MTKHEIINELLEKNNADAILLYSPENRYWFSKFHSSLGYLIITKTQSHLFLDGRYITAARNNKNINKDIELHHFSKNLKQDLIDILNQNNVKTLAFESDWTYFEQYQAYKNHWFKDFDLIGINCSKIRMIKDDWEIANIKKACDITDQVFQAALDFIKPGITEKQLQRFIDDKFLEFGADKISFDTIIASGVNGSMPHAVPSDKVINNNELITIDMGCFYNGYCSDQTRTIALGDVDPKLVEIYNIVYEAQSLGISLVKEGVIAGDIHKQVYDFIDKKGYGKYFDHGLGHGIGVEIHEEPSVGSTGSEVLKENMTITIEPGIYIPDLGGVRIEDDVLVTKTGCKLLTSSPRILLKLQK
CP001621.287	gene=trpS locus_tag=MMCAP1_0308 protein=tryptophan tRNA ligase protein_id=ACU79498.1 location=385774..386784 gbkey=CDS	615.6	481.3	523.7	111.2	127.7	112	3	3	413.372	404.169	401.374	201.778	228.144	200.524	MMCAP1_0308	MQKQIMVSGITPSGTMTLGNYLGVVKRFIQYQNEYDLFIFIANLHAITLPQEKEKLKKNTKEIAALYFACGLDINKTTIFLQSDVLEHAQLGWILTTNTSMGELSRMTQFKDKSLKAESINGKGYIPTGLFTYPALMAADILLYDPKYVPVGIDQKQHIEITRDIAIRMNNKYGEMFKIPEPLINSEIKIMDLQDPTKKMSKSSTNPKAIITMLDSIDEIKSKIKAAVTDSENLIKYDPINKPGVSNLITIYCQLKNISIKQAEKHWENKNYKDLKDDVTQVLIDEIIPIQTKFKELYNSKQVEQWLELGANKARYIANKKLNKVQNLMGLNYNRK
CP001621.288	locus_tag=MMCAP1_0309 protein=conserved hypothetical protein protein_id=ACU79385.1 location=complement(386813..387682) gbkey=CDS	22.5	29.4	19.4	330.6	364.9	370	3	3	15.1086	24.6885	14.8686	599.889	651.916	662.445	MMCAP1_0309	MENKKNNYFSDIEILLTYDYDSCVLFLLNKYGQVQGDYIKYSYNWFVKNIEENLDIKKSWYGLEIHHIDEDKIPNLSSKENRQKYIEYQRADRLVYCNLIEHLLLHIKIYEKNKNNLSKNGIRLIIRKINDYYSCHQFDDDRNKLFYQSIKDKKLDYFNCLAYINDHKILTGNKWYARSLLENEHNNLYQLSVLYDEIDLYLKARVLPSKVDDSINRPKTFKLEKLDDLDYYVEQRKREMQQQKQSRIRISNNTNKPSNSNKSSYKWSVIILTFLALLIFIFIFFVFLR
CP001621.289	locus_tag=MMCAP1_0310 protein=conserved hypothetical protein protein_id=ACU79844.1 location=387795..388595 gbkey=CDS	21.5	17.9	24.6	36.4	33	34.4	3	3	14.4371	15.0314	18.8539	66.0495	58.9565	61.5895	MMCAP1_0310	MKEIRSFNLLEFVNRFSLLELLRYEFKNQKTLTNKEKEFLDIAKQYTLTYPLKVSIDDMLKQIESNKIENDDVKWETQIAVIKYWIGSELIDIFLKDFKSKKTIIDNKNLTEQWMFGYLKKVYEQLFINKLKEFKTECEKYQDVLFVDLFITKLEEWINDKNDIKTFEWYLNKNWDGFNYFYSYLDKKEFKDSTIMNKKEDFINICFAFFNNSKIRINLYEDLELALSLIFGNKEFIKQATDVINAGPPTLKYFILNQLIKVEKIK
CP001621.29	locus_tag=MMCAP1_0030 protein=ABC transporter, ATP-binding protein protein_id=ACU79756.1 location=complement(35495..36529) gbkey=CDS	4969	4374.6	3468.4	2844.4	2788.1	2755.2	3	3	3336.66	3673.55	2658.25	5161.3	4981.11	4932.89	MMCAP1_0030	MAKDKKNTEVSINIEQIQPISKKDPDFEEMKSSKKPKKTKTIKSEPVLLEQMDQREYIVIPNDQKFEPGIKGLKQKQKLQKQLTNKYSKDILNKGHIITTQNYKPNLDKHIIELKNVQKSYITGDLETPVLKGIDIKLDKSDFIVILGPSGSGKTTFLNIISGLDKASQGDVFVLGSNLSLLKDSHMTKFRRRTVGFVFQQYNLLTNLTAKENAEVGENLSSKKNGMSIDEIFETIGMKDQMHKYPHQMSGGQQQRVSIARALAKNPDILFADEPTGALDEEMGRKVLEILVKVNKEYKTTVIVVTHNPNIAKIANTVIHIKNGIIDNLEHNANPADPQTIEWS
CP001621.290	locus_tag=MMCAP1_0311 protein=RmuC domain protein protein_id=ACU79687.1 location=complement(388650..389726) gbkey=CDS	54.6	80.7	62.2	314.7	310.4	335.3	3	3	36.6636	67.7674	47.6713	571.038	554.549	600.319	MMCAP1_0311	MNLTIILIILISILTIICISILFYLIKTKNNDSKIDLISLNDKFDTNKELITKEIEKDTEITKTNLINLKETVNKQKEDLTKSLDKLEKNIQEFNKITNNINTIDKKVDTSVKNINELSLIFKNSKTRGNLGEFTLEWILTNVLGEKTDNGIWQTQYKYKNSNVIVDAIIKTQINDKKIAIDSKFPLTKANILISENTDSYLYKQAEGEFKQTIKNMIKELNNKYISNSENVSSVIMFIPSEAIFELIWSKFTDIFSEAIKNKIWICSPTTLPAVLYSQQISIKEYKISKNINEIQKLIKTITDDVKRLLDRNEKMFKIYEKYKTETEEVFKEFQTSANKIDKNYSKLESINIDDNQE
CP001621.291	locus_tag=MMCAP1_0312 protein=conserved hypothetical protein protein_id=ACU79428.1 location=389942..392662 gbkey=CDS	0.6	0.3	0.3	0.4	0.4	0.3	3	3	0.402897	0.251923	0.229926	0.725819	0.714625	0.537118	MMCAP1_0312	MKKHWYKKISLLVCSNIILTTPVLLFLNKTLTSNYSTNLVTFNNQKINNEKDKKENRKYYSLRDDYLLFHQLQDQSGLCWDFSSIKALETALMISNNEMYDLSEASIAAQLENRVANGANFFDFHNALKNGIAFESDFIFSDLYYLPNSGTYYKKILDLYKPKFIHNLADKLQMVIFDRYNIKNDLNDIKQHIANNSALMVGIEYWTINSNNSNNKKTNEIISGYGANGHAVSIIGWDDNYKCSDGSVGAFIVLNSDNKYENSDGVNYLPYNTNVLYMNLYGYKYIGDKLITSKSTNSIINKYSGYYNSQNKQKPNSDSKPLNQNVFNWTDDIKIEYHFNTNIADLIKMDVQIYLDNLNITNKFKITNNNSVTNVSYEDKSNKLKPGSYTVKLNYKYKL…
CP001621.292	gene=trmFO2 locus_tag=MMCAP1_0313 protein=methylenetetrahydrofolate--tRNA-(uracil-5-)-methyltransferase trmFO 2 protein_id=ACU79310.1 location=393019..394293 gbkey=CDS	50.6	44.5	43.2	2	NaN	NaN	3	1	33.9776	37.3686	33.1093	3.62909	0	0	MMCAP1_0313	MKTIRIIGAGLSGCEAAYYLLKKGYFVELYEIKTIKKNPIQHYDYFCELAYSDSFRSTDLNTSVGTLKKELELLDSLIIKAAKYASINQNNELVVNRIEFSKYITNYLKTFNNLKIIEQEYLNIDLNIPTIIAIGPISTPSFLNKLENLINKENLKLFDSVEPTILKQSINMDICYSLDNNLDYLYCDLNKEQFEKFYNALISAKIFISPLKNEIKLLEKNNYFSIESLAKNKQEFINYFKPINNNAYITIRLKKDSVINNLYTIVNFQTSLMWNEQLKVFSLIPGLENLKIMRYGVMHKNNYINTKKLLNLGVQLKTNKNIFFAGQIIGVDGYVESVCSGLVSAINLDRYLNNKKMILPNKNSTIGSLYHYLLKTDTNFSPMRINWALVDMIDGFELS…
CP001621.293	locus_tag=MMCAP1_0314 protein=putative membrane protein protein_id=ACU79622.1 location=394398..395132 gbkey=CDS	297	413.3	373.1	56.6	53.6	49.4	3	3	199.434	347.066	285.951	102.703	95.7597	88.4454	MMCAP1_0314	MLFFLTNGAAICVIILLFAIAYMMDPKFLKTITTTKITMMAMQVALIVLLTNFLGYSGVFGARLMLGNFILFLSGMLFGPMGGALVGALSYTAGMVNPGIFIHFSFMAAYMIYAMLGSLVFIKKQKSRLSFMISVFVLLFIASFTLTFISHPIAMLAIGKNAYVYVTLVKKFIVFPIDAVIEPILIISTFEVSILVLKRVPNTWNQLWCTRFDSLEFLNKQEKKSKKDLKITQNEPIITSQASN
CP001621.294	locus_tag=MMCAP1_0315 protein=conserved hypothetical protein protein_id=ACU79481.1 location=395254..395406 gbkey=CDS	NaN	46.8	12.3	271.8	287.4	280.7	2	3	0	39.3	9.42697	493.194	513.458	502.563	MMCAP1_0315	MSDNIKDLPFDEIIKRIKFYADLKAKNLITEEQNQEYELLKSWYLEIVLK
CP001621.295	gene=tkt locus_tag=MMCAP1_0316 protein=transketolase protein_id=ACU79793.1 location=395465..397435 gbkey=CDS	2016.5	1754.9	1757.7	237.2	248.1	209.7	3	3	1354.07	1473.67	1347.14	430.411	443.246	375.445	MMCAP1_0316	MKTSKNDNLNALRILGVSAINKAKSGHPGIVLGAAGIVYVLFNKIMNFNPKNPEWFNRDRFILSAGHGSALLYSALHLSGYDLSIDDLKQFRQWDSKTPGHPEKTLTCGVEVTTGPLGQGVGMGVGMAVAEAHLASVYNKHDFNLIHHYTYVLCGDGDLQEGISQEAISFAGKHKLNKLILIHDSNDVQLDSNVVDVQIEDMHKRFKACNWNTIKVSDGEDLNSIYKAIRKAQLSDKPTYIEVKTIIGLGSTKQGTKDVHGAPLNDDITKVKKYFDWDYDDFIIPDSVYKHWSINAKKGEIEEEYWNQLKAKYSLKYPELSSYLDNAINKNITFDFSSLLKDIPNNDEATRLSSGKIFEKIANHEKMLIGGSADLSSSTRIKGADNQFTSLNKTGRNIM…
CP001621.296	locus_tag=MMCAP1_0317 protein=conserved hypothetical protein protein_id=ACU79210.1 location=397451..397696 gbkey=CDS	NaN	18.5	NaN	126.6	144.3	144	1	3	0	15.5353	0	229.722	257.801	257.816	MMCAP1_0317	MLLTTTFSAGALAGMLIGVIIAAIIIGLILGFVITRYMVKKQLKDNPPITEKQIRAMYMSMGRKPSEADIKKTMNAIKRAK
CP001621.297	locus_tag=MMCAP1_0318 protein=conserved hypothetical protein protein_id=ACU79378.1 location=397764..399308 gbkey=CDS	31.3	34.3	34.5	8.3	4	7.7	3	3	21.0178	28.8032	26.4415	15.0607	7.14625	13.786	MMCAP1_0318	MAIIDQLFDWQKELIIKNKHKNQLGLFLDMGSGKTILSLGFCEINQVDAIIVIASRSKTLETVEQNASFTSYLQNDLNFKVYLKTDLKNADFKNNQKEAIIINYHSFLLNINKENFFNYLAKFISIHKNQKIAIIIDESQNIKNSKALISISIKNFVDLVKKLAFKTYLYLLSGTPQTTGAIDMFNQLRFLGLKMTRYQFEDQFCIKTQFNNAYRRVYKINGYKNIKQLEQLINQFALTSKNIPPIYLPKQQFIGIKLPISSEFELFTNKKITEYDLLNFCNKNNIKSNYKPNQLNLIKNPYYKNLSYPDDKWIAGDDATFWLRTRQISIGFQGNSKDYYWFDYSRLNKLEQLLTDKIDNYIIFYNYDPEFDEIYKICKKLDYKIDIWNGNKKDITNYL…
CP001621.298	locus_tag=MMCAP1_0319 protein=putative liporotein protein_id=ACU79476.1 location=399398..402295 gbkey=CDS	36.6	30.1	25.2	19.3	22.8	21.5	3	3	24.5767	25.2763	19.3138	35.0208	40.7336	38.4934	MMCAP1_0319	MKRTKLISILTCLTALTSSIVVVSCSNDKTTTLHNKQINISKLDLNTNLYDIKDNTPKTIIKTFLDINNHKLSNLNENQLEVKMINDSNAIINIKNSNQFIGNTNIKFEAKENKINPTDLNTITNTINWTSLTPALININSLNLITNLTNLNNSNNTTILDQFLKVNKTVLKDLSIDNFEIIKKEGSTLIIKVKDSKKYFGTIELKFEIKEPKNKSDIIPGLLIKPIANKKRNIKPEVESTINITNPTSSTKPQPRKKREVKEEQPVVKKEEVIKKSVPLTPLTEAKKVSSLISLTPATPVITSNVSEPSISASQPIKYEPETFENITIDSSSSLDTINTKYIDQTLKAFNKIGLDQNKAKEMMLNNDVAPNFYSHPRFELDKDVIVLDKFRNNEVKLE…
CP001621.299	locus_tag=MMCAP1_0320 protein=triacylglycerol lipase protein_id=ACU79783.1 location=402303..403100 gbkey=CDS	18.9	11.1	12.8	1.8	NaN	1.8	3	2	12.6913	9.32116	9.81018	3.26618	0	3.22271	MMCAP1_0320	MSIIYDYEFVFKNNCNDKENIVFCHGFNSKLTSFNGFSNYWTKSNYYALQFPGSNLIKPIKNHKISVEQFSDLLIEFVKQNNLKNVILIGKSLGAGVISLAYLKQPLLFKKLILITPINKTQLSLEFWKKNYVFINSFNDYLTKFVPYIYYNYDHLLNNSNWVNNAKSKFNLNYYTNKYILQLAKSLTDINLHNKITKAYQSINIPTLVVLAKNDKIIDCDDSLNFFNKTIKNVKTVVINNASHMVYKDQSEKLNQIIDDFITNN
CP001621.3	locus_tag=MMCAP1_0003 protein=primase-related protein protein_id=ACU79740.1 location=2675..3217 gbkey=CDS	162.3	124.9	119.5	60.2	86.3	83.1	3	3	108.984	104.884	91.5872	109.236	154.18	148.782	MMCAP1_0003	MSKIKQIIIVEGKTDSDKLKSIYGNDLKTIQTKGLSLNKKTLEMIKEFNNKTGVIIFTDPDGAGKKIRQTIIDYLDNKVLNAFIKKDDISKTSKKVGIAEASDDAIKKALDNLIIYDKNNVSLSWTDYINNDFYLKSNRIVICKYFNFDNNISSKTLFKWLNWMNVSIDDIKKIIGEYES
CP001621.30	gene=hslO locus_tag=MMCAP1_0031 protein=chaperonin HslO protein_id=ACU79866.1 location=complement(36577..37443) gbkey=CDS	318.1	245.2	270.3	67.7	64.1	69.8	3	3	213.603	205.905	207.163	122.845	114.519	124.969	MMCAP1_0031	MDLKIRAISNKHNLRISIVDISETIKEITDLQQSNTLANMVFSKFVCCSTLIGMQFKNKEKTYVNWNAPNSLTKTMIAEYHDSKIRAYIQNKNVNIDNFNNKDLNEIICLIASNKGDLIVSRDLNLKEPYVSNIEIEYGNIDYDFMKYFNQSNQAKSFITTEVKFDDNLEIKKVVGILVEMLPNHTKEDLDYISEKLGNTSYVKDVLVKSTNYYAIVKEIDNDATILDQSTISFECTCSYQKVLSTLNLLNQNDLKDIIKDNKPVEVVCDFCNQKYQIQIQDVLTLLN
CP001621.300	locus_tag=MMCAP1_0322 protein=divergent AAA domain family protein_id=ACU79168.1 location=404006..405463 gbkey=CDS	59.8	48.1	34.9	4.5	NaN	1.3	3	2	40.1554	40.3917	26.7481	8.16546	0	2.32751	MMCAP1_0322	MFKIPIESSTHENKELFDENKPKNILKTICAFANTNNGSIYVGVNDNGQIIGIDNVKNKINKLSSFIKDKINPIPKFSIRSEVINKKTIIIIEVEKGDNTPYYLFDQGSLTAYVRYGDQTHIASREEIFSLGLSGKNLSYDALQTDIPWNSATFNLLNSYFNELGIRIIEDYNDLVSLELAKNNVLTNAGALLADQRFIKHSLVFATYWNDFEKSNKKSGKSIENFDGNLLEILKNSQQFIENKSNVDFKKTDTKRIDYPDYPKLAIREALVNALVHRDYTKFYDQININMYTDRLEIISPGGMVDKSKIQELDPYRIESKRRNPILANIFSMLKLMERRGSGIKEILNIYAIQENYSLKHIPQFISDDKSFIVILKNLNYEQAESLNTNTSEYLNKVN…
CP001621.301	locus_tag=MMCAP1_0323 protein=putative liporotein protein_id=ACU79307.1 location=complement(405481..406974) gbkey=CDS	33.1	45.9	35.2	131.7	129.3	121.7	3	3	22.2265	38.5443	26.978	238.976	231.002	217.891	MMCAP1_0323	MKKLLFILPITSIPLLTITSCSTNFQLPESNKKYNENNIKKEIKNFTYNDITYNLIKEDNIDPENVYYANEVLENDAKQFKSYIPDYKKYFYNQVDNKLKLTTPDLGASWFDFPTIAKLSQFVRSLEHYNVVNSSNSSFMLKDNTTKQQLTSEEYNNLVNKILEILKNQNNLIKTINDEEVDFSSINNSKNEKVSDQLPSTLEHRKQEMGFNDKSSNKDYWGTYTETKLKSGAIKKEYSETPLKDSKATAFLDGSLKQIPVYLWKLQKIFDFNGNFKNEYFLQREFFEKSSEFNREKQDLNNEISDYFYRNKIKIYAMQKDLWNMLIAYLEFQKAMTTLGNVSDENLSLEDNFKNNGIISALANFENKLLEYMKLSQLFGWLIDPSKEDLNLQLFPGGT…
CP001621.302	locus_tag=MMCAP1_0324 protein=conserved hypothetical protein protein_id=ACU79351.1 location=complement(407143..407667) gbkey=CDS	109	108.8	101.9	72.4	8.7	NaN	3	2	73.1929	91.3642	78.0982	131.373	15.5431	0	MMCAP1_0324	MNKIIKQPVYNADQTECLKIGYEWYDNQISIIPLPHTIKKVPRVLPTQITSLENAFIYNQNEFIDGIEYWDTSNITNMYSMFYEANNFNQNISMWDVSNVVDMSYMFCWAYKFNQDISNWNVSNVKYMNDMFYCANNFNQNISKWNVSNVKKDYQNIGSGGFNWKDEFKPKFNK
CP001621.304	locus_tag=MMCAP1_0326 protein=conserved hypothetical protein protein_id=ACU79163.1 location=410540..411301 gbkey=CDS	26.9	33.5	53.2	479.5	490	537.1	3	3	18.0632	28.1314	40.7736	870.075	875.415	961.62	MMCAP1_0326	MTEYELITTKLNELIKMSRKKELSQDQLFDICIYLTNVIDDVLLKKNLKDDLINQNDQFYYLLYLLKTLLAILFTRNAFFNFDIFNKLNPVLLFYIKQSLDHQFYDDPKKNYLLENSELHSLTSMYLYVFSIFNKLIKKINYLNLKYNLKPNLNEYKRSSFINDFTNLSYAFFKTRGTQYRSEQFFKLVKHSWIFNHLLEIKTNLDNSDYLVNLVFELECLFIIICRIFIQITLDFKTNYEINKLLEINSTNL
CP001621.305	locus_tag=MMCAP1_0327 protein=ScpA/B protein protein_id=ACU79728.1 location=411311..412147 gbkey=CDS	22.3	27.4	15.6	NaN	NaN	8.5	3	1	14.9743	23.009	11.9562	0	0	15.2183	MMCAP1_0327	MKHWQELTIDQFSGPIELLWLMIKEKKLDIIELSLIEIVDQYLAYIKQNQQLDIEIASEYLIIASQLIELKSRHLLFKDQQVDQEQVVDYDDLVYQISQYNQIKEISDRLFNAQEAYLQTFSKKRSKQNFKKDLVFENPDPLIDLNDLDLDKLTEIFYSVITNSNAFKYQADFDLETEIYQTLTTPSLTVHEVILDVVNKITSQKLKEWKLEELLEILELNLKNFVVIFLAVLDLVRYQILVIDSIDDQIYISLRKEVIENENLIAQQLEVIANESTI
CP001621.306	gene=scpB locus_tag=MMCAP1_0328 protein=segregation and condensation protein B protein_id=ACU79375.1 location=412131..412760 gbkey=CDS	621.2	530.5	574.9	81.6	89.8	101.1	3	3	417.133	445.484	440.615	148.067	160.433	181.009	MMCAP1_0328	MNQQYSAIIEGLLFIYGDDGVSLLDIQTVLDNLKPTEIKEIIIELNKKYLADPSSAFCIQTYKKNNYRLQTKPELHEYFAKLEQYNENKKLSHSTIEVLSIIAYKQPITKQQIDEIRNVDSTYQLYKLREKKLIKVVGKDLENNRSNLYGITDNFFKVFNIKGGIEELPTISDDDIKQAIENNNEIKQEQQNLDLYGNIDDFNLDSQNQ
CP001621.307	locus_tag=MMCAP1_0329 protein=ribosomal large subunit pseudouridine synthase B protein_id=ACU79274.1 location=412828..413586 gbkey=CDS	278	244.9	261.3	89.1	84.7	80.5	3	3	186.676	205.653	200.266	161.676	151.322	144.127	MMCAP1_0329	MSLERLQKVISSRGYCSRRAAEKLILENRVKVNDQIINTLGVKIDPKAEIKIDNKLVLSDSNNQKYYYLFYKPRLVLTTMYDPKKRKTVNDYFKDLNHRVYPVGRLDYDVSGLLLMTNDGVLSNFIMHPKYEFLKTYQGLCQGQVNKQQINQLIKGVYIDNDYLTKAYSAKLVKYDKLKNTSIVELTINEGKKHHVKKMFESIQAQLLKLKRTKIEFLEIADLKPGQYRELKTHEVKRLYGIYHSLKQDNNK
CP001621.308	locus_tag=MMCAP1_0330 protein=deoxyguanosine kinase protein_id=ACU79195.1 location=413596..414213 gbkey=CDS	853.9	633.2	539.8	171.5	180.9	178.5	3	3	573.39	531.726	413.714	311.195	323.189	319.585	MMCAP1_0330	MKIAIFGTVGAGKSTISAEISKKLGYEIFKEPVEENPYFEQYYKDLKKTVFKMQIYMLTARSKQLKQAKNLENIIFDRTLLEDPIFMKVNYDLNNVDQTDYNTYIDFYNNVVLENLKIPENKLSFDIVIYLRVSTKTAISRIKKRGRSEELLIGEEYWETLNKNYEEFYKQNVYDFPFFVVDAELDVKTQIELIMNKLNSMKNPN
CP001621.309	locus_tag=MMCAP1_0331 protein=conserved hypothetical protein protein_id=ACU79246.1 location=414225..414938 gbkey=CDS	1035.6	928.4	783.7	220	231.5	207.3	3	3	695.4	779.619	600.643	399.2	413.589	371.148	MMCAP1_0331	MGRAHEVRAASMAKTAAKKSAANGRAAKEIYMAAKQGGTDPNSNLALRSVIDKAKANQIPRDVIERAIKRAAGGDAENYVSNRYEGIGPSNVAILVDTLTSNVNRAAAMIREVFNKNKGNPDGKVSFLFEDVAMFAFKNKKEDEVLEALMSDEVEINDLICEDDTIIIYAPFKAYNSVKHSLDKLNIDEYLISEIRAIPIDKRIEIKDEQAKLQLQTLLDKLDELEDVQNVYHNAEL
CP001621.31	locus_tag=MMCAP1_0032 protein=GnsA/GnsB family protein_id=ACU79534.1 location=complement(37535..40696) gbkey=CDS	24.6	30.9	22.2	86.3	94	88.6	3	3	16.5188	25.9481	17.0145	156.595	167.937	158.629	MMCAP1_0032	MLKFIKNNKWWVAIISVFAIFLSSFGIFAKSYVDSNKQKIVNKVQNYVQASSYAVQSRILKETENLNEDYLNQKIGKKSLLDEFNNDFIWRPNNSKTTSIDTISDLWNTYFGSSTNVLDKNLQIQYKNNNEYKNIENSKGEITPQNIDFLFSISKSLEKFLNGFAPSLASLGLSFIQNTVLNNRDDPNFKNYKNGLTKFADLIENNKDLFSYLGKILTPKQLENDHYNNLTVQQALIKNINQIAAVISNKKEFSKEVEADKIPEALDYVLTYLGLDSLSEILSDLATSQLDLKNLDKLLEKIKFIFDSDNIKQLKQKALQLIDKSMPYLATYLYSEIFFGLYYTVHEEIKDPSVLLNQKLDNNHFLALTKNKLDLNILINGVLKVLKNKNSFDRFYDFI…
CP001621.310	locus_tag=MMCAP1_0332 protein=conserved hypothetical protein protein_id=ACU79288.1 location=415038..415865 gbkey=CDS	2.8	8.2	9.3	15.7	20	25.7	3	3	1.88019	6.8859	7.12771	28.4884	35.7312	46.0131	MMCAP1_0332	MNFSLVNFVLLIINLLMIFLILLIYLITTRSYLNHQVPFINSSNLVINSTDINKAIRQFQIMFNLTDYQIIYTDTDNMIKVFKNINKNKKQIIISKRIFESVGYELDYLISRLWISAKQIKKDSLLKAYRLTLLTIPTLLITLLSLSMLINLFLFVYNVITDNFQISNLTNNQNNMNINFLYKLWKYMIFNYLSFSLIICLFINYYISIIIKNKIELYYNDEVSKLVSSALEMYEYDFKAARIYALNIKWTYIPVFKINNFWTNHYKWTGPFTIV
CP001621.314	locus_tag=MMCAP1_0336 protein=PTS system, IIA component protein_id=ACU79174.1 location=418710..419159 gbkey=CDS	170.7	115.1	114.3	57.6	52.5	67.3	3	3	114.624	96.6546	87.6018	104.518	93.7945	120.493	MMCAP1_0336	MLFKEKLVTYIDTKITSWQQAIQIANQLLINNHYIDDNFSKELIELTNKLGPYYIIAPQIALLHLTPKEEWKNKNNAISLTVFKEPVVFKDDMKYHVKYCLSLFAKDNYSHIDLLEKFANLFSNKDFLNELEKVKNTQDILLVLQKYDK
CP001621.315	locus_tag=MMCAP1_0337 protein=PTS system ascorbate-specific enzyme IIC/IIB protein_id=ACU79071.1 location=419171..420979 gbkey=CDS	16.9	25.8	19.7	21	8.5	7.3	3	3	11.3483	21.6654	15.0985	38.1055	15.1858	13.0699	MMCAP1_0337	MEFGKYVLNFFTEFISTPAILVALFAFIGSLLQKKKFSECLTSTIKTAIGFLIIGAGAGIIAGSIQKLGFAFNLLFQRSGAIANNDVLPGLFLSISKIVLAGSLIMICAMFLNIVLARISKFKYIYLTGHVLFYFSTMFASVMHVAGLNLDEVKNLTTVVISGALLVSIYMVLTPALLNKHVVKITNNNNLALGHTGSLGYFLSALIGSLIAKISKKKIRYTEDVNFPKGLAFLRNTNVAIGLTMLLLYLIIYFTTFIVHGYEQMVVHKIIENQKDVFVQGLLQALTFAAGVEIVLIGVRMFIAEIVPSFQGISQKIVPNAKPALDCPIVFPYAPNAVLIGFISSFIGGIIAMSITILIVSLKNINVNLWIIIIPSIVPHFFVGATCGVFGNSTGGIKG…
CP001621.316	locus_tag=MMCAP1_0338 protein=putative liporotein protein_id=ACU79209.1 location=421150..421869 gbkey=CDS	1335	1922.5	1739.8	1327.7	1416	1381.4	3	3	896.446	1614.41	1333.42	2409.17	2529.77	2473.25	MMCAP1_0338	MKKLLTILGSVGLVATSGAFVIACGDKPKMNDAKSIQEEKIDLNKLIKVRDLGFVSKNEKEIIKSAFVKQNGLNDPKLKDKIEVEVKTNGSGTSGAGTTASTNGNSSDSAVIEVKNKTNGNGNVTKTVTVIFDVNNSLKTLVKVTKLKSLPDNKDETILAAVAKANPKSNLDTQKLKIERTDGKVLVKSSDGQTYKDEAELQIESKVGVYVGLSLLSVALLASSGFIIYRSVKKKKKQM
CP001621.317	locus_tag=MMCAP1_0339 protein=Na+ ABC transporter, ATP-binding component protein_id=ACU79306.1 location=422272..424092 gbkey=CDS	161.2	104.9	133.6	14	13.9	13.7	3	3	108.245	88.0892	102.394	25.4037	24.8332	24.5284	MMCAP1_0339	MKNVSKNLHSDVLDEKYSIVVDNFYKKFKDIEIGPFSFNVEKGKITALLGTSGSGKSVFINSLLGTSINYQGNIFINKNERKKNNSIENNSDIGFYSQMDFSLYSISAYDFLYNMCYVMGLEDKLVKDKLEYWLKRFDLWESKDKPLKSFSWGMKNRINLILCFIKEPKILVCDEPGANLDSYWRKEIYTILNEFKKNFNTIILTVHNIDEVYDIIDNFIILEKGKLLFCGTKQELNLYKKTKITFKNNISLQHVEQILNKNDILTFNINYDQNSLVVGLKEFQTFSDVLDLLKKHDFFIKSIESLSIDIDMIKKALEDKNTINVKYQKNSLDSLNENLDYNNTLSLNKTITNISNITNLRDSTSTNYEVEILNNNNNNNNLLNNNLEKTFLHIFDEIK…
CP001621.318	locus_tag=MMCAP1_0340 protein=ABC transporter, permease protein , putative protein_id=ACU79392.1 location=424108..425898 gbkey=CDS	NaN	2.6	NaN	NaN	6.3	2.6	1	2	0	2.18334	0	0	11.2553	4.65502	MMCAP1_0340	MPKKVKNSKKLDDSLNLIKYKKIPFRKLIKFCLKNLIKERLFSILNILNILVSILIGILLGFLKSGEKQVIIFNFYILFFTCCLLFVLILKMIQFFYNKNLEDKTTYIVLTNQVSRTKFFFSQYFLINLIILINIFLSFCFINLTYSIFNSFKYDSFILKMTLVYFLYNLFASFCLINFISMLMFLFSLQTTTIICTLLVSLCFVANIPLSFVKANEKSYNIQFLDKNNKVEIFKLTDIYDTFTLNENILNSQIKYPYLSKYIYSYFIKNKFLKDQFSNPNNIDLRIKIWKDLGLVNDQKVIIKENNLKLFSKPQENNKILNSWNKNDLFNLQLVLNNTFISNQQLNLLIDKTTDINKKRILIDFKNFSNEINSFFKTDLQTSKYDLLYDFLFLDNLKN…
CP001621.319	locus_tag=MMCAP1_0341 protein=viral A-type inclusion protein, putative protein_id=ACU79606.1 location=425927..427327 gbkey=CDS	176.7	124.1	123.3	19.2	18.6	13.3	3	3	118.653	104.212	94.4996	34.8393	33.2301	23.8122	MMCAP1_0341	MKSLLKLLSIISFTPVISFLVLSCNNTNQSPNNNTNSNNSSSNNEQSHPNNVFNENKEILLKLKNELITIDNNIKTSTKNLKEIQIDIYNIENELNRLTNSDIKKDQLAKLNENLQTIKTKTNSFLQSINKSTKDYQLVKQTLDQSNDKQLNKKELEELKKEIKIIKNNVLLITLNIENVLNELKHLLKTINNIKETIFTKEQIQRAKVGLTNLEKQLNELKNIIQKIEYTNVIKKELDNLKQIIKNAQTKITPANDNLVKFELDLKQLYDRIQNLDSTNFNIDQLNVIKSFSSSAKQKLLTINNSLLDSQNQLKEIKVILKDIKDVNIVIDNKISELDNLKQKIEELKKEFENLKLDLDQFDIKKINTVKINALKTFFNNSYQKISLLKKQAIDIKKS…
CP001621.32	locus_tag=MMCAP1_0033 protein=hypothetical protein protein_id=ACU79278.1 location=complement(40819..43977) gbkey=CDS	62.4	93.6	59.4	80.4	79.8	90.1	3	3	41.9013	78.6001	45.5254	145.89	142.568	161.314	MMCAP1_0033	MLKFIKNNKWWVAIISVFAIFLSSFGIFAKSYVDSNKQKIVNKVQNYVQASSYAVQSRILKETENLNEDYLNQKIGKKSLLDEFSNDFIWRPNNTKTTSTDTISDLWNTYFGSSTNVLDKNLQIQYKNNNEYKNIENSKGEITPQNIDFLFSISKSLEKFLNGFAPSLASLGLSFIQNTVLNNREKSNFKNYKDGLNKFADIIENNKNLFSYLGKILTPKQLEKDYYNNLTVQQALIKNINQIAAAISNDQEFSKEVETDKIPEALDKLLTELGLDSLSEIIGELINSQNGSTNLTQLFNKIKNIFTLKNFEKLKAKALELLDRITPHLATYLYSEIFFGLYYAANQHIKDPNELLVQKVDSNKFLALTNNKLDLGILLNGIEVILKDKKGFERFYNFI…
CP001621.320	locus_tag=MMCAP1_0343 protein=conserved hypothetical protein protein_id=ACU79457.1 location=429776..430471 gbkey=CDS	165.7	132.1	125.8	258.9	244.8	260.3	3	3	111.267	110.93	96.4157	469.786	437.35	466.039	MMCAP1_0343	MNPLLERKVNETLKKVKTVISDAQDNVNELQNIFNNQLKKLTKYHVQSSTNSFQEAKSTTYYLAYYDKKSKRFKEANLNTSELSEDQNGEIQPIDTPNIEYLDEYKNVINLQSGLKAKFVIEKISEILNAIYNGVESYLKDNLEKTLALNYYEQELLKINNEEFVNLLARNDLKLVDWNSQSLEEKINHIKDALIDKNNQIINLNKKINELDNINIMIDKQIDSIDDQIKK
CP001621.321	gene=ppa locus_tag=MMCAP1_0344 protein=inorganic diphosphatase protein_id=ACU79755.1 location=complement(430527..431087) gbkey=CDS	9074.5	5574.9	7651.9	1557.1	1522.1	1601.4	3	3	6093.48	4681.49	5864.57	2825.43	2719.33	2867.13	MMCAP1_0344	MKNNVISMVVEIPKGSSNKYEVDEKTKRIKLDRVLYGANFYPGEYGMIENTLDWDGDPLDVISLCTYPTLPGVEVNVRILGSIKMVDAGEVDTKLFGVFNDDPRFKEYKTLNDVPKHYRDEIENFFLQYKALQNKVVKINGWGTLEEALEELEECKTRFEEYKDRLAKGQKDEILAEWKEKGLGQA
CP001621.322	locus_tag=MMCAP1_0345 protein=conserved hypothetical protein protein_id=ACU79460.1 location=431226..432116 gbkey=CDS	94.9	201.3	153.1	142.4	133	111.5	3	3	63.7249	169.041	117.339	258.392	237.613	199.629	MMCAP1_0345	MKESKSLKEQLNDVVCNVDKDLETHIEHEDENHKNKDHYHGIHHFDQFGNHDDIQNQKFELKTVFQFNRKKLIFKIALTGIFLALAASVSALDILLESIKIPVSDQVWIQSRFLDISIVCISIATLGPIFASLLGFLAPILHNFIHGMEHGWIQPPIEAVINVFIVWIVFLIFNVMFSNSPIHHDTNKNVARFKRWTPLPIMSVLVAIVSTLGFILALYIDSKTNTTGIVSNNSQLFFHAGHDHGHVHDDNMLTFNKINMFIVIAVFGWNVLRYAIALLLFILVEWKMRPINHRYK
CP001621.323	locus_tag=MMCAP1_0346 protein=conserved hypothetical protein protein_id=ACU79799.1 location=432182..432877 gbkey=CDS	38.8	52.7	41.8	292.8	274.1	274.1	3	3	26.054	44.2545	32.0364	531.299	489.697	490.747	MMCAP1_0346	MNKEYTSRNQLFNKEIDLVNQQIKSAKSLGNYTKFINNSLNVLTKLDEKYFTNSFINLYDEFEKGSFYLAKTKISQTINQELLNNIDKQINLLKNISTNDLVDLKNYSDFIVLDEQKFHFVNLLNMTKDIEFHKKTTSQSFESSKIINNDFTNLTKANFEQNDLKQVQNNNDLKQILITDLIKKTKSENLKKIFELERKKQMYQIKKNWFLIWISIFIAIMIFSLLLFIVL
CP001621.324	gene=cmk locus_tag=MMCAP1_0347 protein=cytidylate kinase protein_id=ACU79704.1 location=432886..433548 gbkey=CDS	603.7	312.4	421.4	71.6	69.1	61.6	3	3	405.381	262.336	322.969	129.922	123.451	110.288	MMCAP1_0347	MSKLIVAVDGTSSSGKSVICKKVAEILNYQFVDTGLMYRAFTWYCLFKNIDLKNQNQIISLLDSFNYQIKDDQIFVNDINVTNKLISSDILNVINQITVIKQVRDYMVKAQQQLVKNKGYIVVGRDITSVVLPNADLKIFLDCDLEIRAKRRFEQNIKNHILDKSYKQIYNDLYNRDKTDKSRLIGPLVLVDDAWYIDNSYLTINQVVEMIVNKIKSLES
CP001621.325	gene=engA locus_tag=MMCAP1_0348 protein=ribosome-associated GTPase EngA protein_id=ACU79216.1 location=433555..434862 gbkey=CDS	194.2	195.7	176.3	78.6	81.1	86.3	3	3	130.404	164.338	135.12	142.623	144.89	154.511	MMCAP1_0348	MKKQVVAIVGKPNVGKSSLFNRIIKEKKSIVDNKPGVTRDRIYSSAEWLTREFILIDTGGISLSDQLFSNEIKLQTQIAIEQADVIIFVVDFLNNLDNDDKMIAKILHKSKKPVILAVNKYDKKTIDDHNYQFMSLGFSDLYFISSTHGIGVGDLLDKVISYISKNEEIIKDDSTKIAIIGRPNVGKSSLVNSLVNENRMIVSEIEGTTLDAVDISFSYNKKKYTVIDTAGIRKKSKLGQTIEKYSYLRSLSAISNADIVLLMIDATKPITDQDTNIGGLIYDEKKPVIIVVNKWDLIKNKETEILKKEEEIRAYFKYISYAKIIFISTLDKTRITKILDLVDEIKQNLDIKIKTYVLNEVLNKAQLINPAPEFNGNRLKIYYASQVQAYIPTFVLFCN…
CP001621.327	locus_tag=MMCAP1_0350 protein=DNA-binding protein HU protein_id=ACU79041.1 location=435885..436157 gbkey=CDS	3751	4222.5	4073.1	1178.6	1293.7	1328.4	3	3	2518.78	3545.82	3121.71	2138.63	2311.28	2378.36	MMCAP1_0350	MTKKELIEEIIINENISKVDAEKVVNRIFQTISKHLIDGKEVSVAGFGKFVISERASREGVNPSTGEKIVIPASRSARFKPAKQLKESLM
CP001621.328	locus_tag=MMCAP1_0352 protein=conserved hypothetical protein protein_id=ACU79224.1 location=436212..436760 gbkey=CDS	269.8	221.5	273.7	29.1	27.5	23.1	3	3	181.169	186.003	209.769	52.8033	49.1305	41.3581	MMCAP1_0352	MILKMLEKGIISKKKLLLEYYKKLNLTDNQALIILMIMYLNDQTRKMTTPNLLANYLNLSSVEIEKELELLAEKDLIEIKSDFIDFSNLFQKIGLLVNDSFLIEQNITFFNDLEKNLLFSLTEHQKLKLLDLLKTSIKKEQVLQLSINKKLFSFEELLKEVEIFLKSTNKFKQFDWLDDQNV
CP001621.33	locus_tag=MMCAP1_0034 protein=efflux ABC transporter, permease protein protein_id=ACU79377.1 location=44124..49511 gbkey=CDS	59.2	88.2	65.9	193.3	190	181.9	3	3	39.7525	74.0655	50.5071	350.752	339.447	325.672	MMCAP1_0034	MKNLYLMLKQGVKWILKFKLQLIVIVVLTFIASSILTISFTTNKRLSSAYDQVVNNQKSPKFDSTYQITVGSKAKPEKGDPLFIPIFDFVDKQYTGFKDEGYDNFNLAFNDIYKNKDLLTITTSSQEFKDAWAKKKEVFEYKENLDDIKQLSKEQEQFDFAINDVFFNTMAELLSKNDPAIKNTVIGRYTLSNPNWYKHFYDKEKNIKSNWSEFIKDKQKIENLKKSNPDDLKTYFYSYYAFESLSQYFFKTIQTFLQNKDSELAQQSNNNKNEAHKYFYEFLFGKYFDNNKASYKEDYIANNNNLYTLTFDSTVSSSEFEKMNFLISSENKEQNSQDQNFFNELVKKGFKGILRPLQITYQNFGDQVDIKNVVQYSETQELRGFVSNSNIYSQNVKEL…
CP001621.330	locus_tag=MMCAP1_0355 protein=putative liporotein protein_id=ACU79440.1 location=439420..440643 gbkey=CDS	42	60.5	44.9	136.9	137.8	140.3	3	3	28.2028	50.8045	34.4123	248.412	246.188	251.192	MMCAP1_0355	MKKILIFLNSLLVISLASLVISCYQLDTQTLEMLSTKIKDELNEIDLKITNLQKENNSLESQLQELKNIEKISSKFEPFTRLYDKANGYRYKASKINLPTKNQYFKIKIKLNKFKNNQQVKVLLNDIQIKENQILNQEKINYQLKQNIENTKENLSKFWGYGINPVYNKNQLVKIGYFLTKDFEIQIEKIKPETNQVPDHLPKEITSLKLAFQQNINSKIKGIENWKTDNIKNMSEMFEKAKNFNQDISNWNTSNVIKFNSMFNEAEQFNQNLSNWKTNSAINMDSMFVDAKNFNNNNQKLVWNTKNVTNMRSMFLGASMFNQDISKWDVSNVTDTSNMFFRATSFNQNISNWNVLNVTNMSKMFFGASSFDQDLSKWKVNKNVVFDDFASRSKIDNDN…
CP001621.331	locus_tag=MMCAP1_0357 protein=putative competence-damage inducible protein protein_id=ACU79735.1 location=441110..441580 gbkey=CDS	52.4	94.8	95.1	65.4	57.1	58.9	3	3	35.1863	79.6078	72.8866	118.671	102.013	105.454	MMCAP1_0357	MSLKKLVKLLIKNNLTISTCESFTGGLFSNLITNVKNSSKTFYGSFVCYQTMFKENILNIDKQVIKKNGVISFECAKEMLIKTYELTKTNIVLSFTGNAGPNSIENKPVRLAYIGIKFNDQIKVYEFKPKFIRSRRCFKKRAIKFVIKILKKMILF
CP001621.332	gene=recA locus_tag=MMCAP1_0358 protein=protein RecA protein_id=ACU79599.1 location=441623..442660 gbkey=CDS	79.4	67.5	72.7	7.7	3.2	NaN	3	2	53.3167	56.6828	55.7187	13.972	5.717	0	MMCAP1_0358	MSTELQNTIENNDIRESQMWNSKELKEAIKEIEKMFGKGSIMVLGQSDNLNIETFSSGSLLLDNALGIGGYPKGRIIEIYGPESSGKTTLSLHAICEVQKLGGIAAFIDAEHSLEPKYCQTLGIDTNKLLVSQPDNGEQALDILEMLINSNSIDLIVVDSVAALVPKTELDGEMGDQSIGLQARMMSKALRKLNGLIAKSNTTVIFINQLREKIGVIFGNPETTTGGKALKFFSSIRLEVRKAENILNNSEIIGNKIKIKVVKNKTAIPFKTTTISLLYNKGIDKLGELVDLLVSYEIIEKSGVWYSYQNEKIGQGRTSVIQWLNADENKINELTEQVKKLIKQD
CP001621.333	locus_tag=MMCAP1_0359 protein=conserved hypothetical protein protein_id=ACU79184.1 location=442796..444325 gbkey=CDS	97.6	145.1	124.5	350.4	379.6	365.5	3	3	65.5379	121.847	95.4193	635.817	678.179	654.388	MMCAP1_0359	MEENIIIILSVFLGIFFICFVISSVILLYFWKSKSRKHLIEQYTKEAKQAKKQVLANGYKEISEAKMLFLKRSELEKNELDRVKEQLDLRANDLKRSQEIVESKSQRLDAGILDLEKRKFLVDQKEEYLIKLLEDVSGLTKYQAKELLIKQIKNKSEKELISILKNAELQAHSKAKIISNNILISAMERIKVELTSQRTTNIVKLPSDDLKGRIIGKDGRNMKTFEQIGGVDIVVDETPNVVVVSSFNPIRREIATRTLEQLIIDGRIQPVKIENELKKQEQELEYIIQETGLNTIKELNINDIDIELVKLIGKLKFRTSYGQNVLAHSIEVAKLSGAIASELGLDVEKAIRAGLLHDIGKAIDFEKQGSHVVLGAEIARKYNEDPIIINSIESHHEDK…
CP001621.334	gene=ffh locus_tag=MMCAP1_0360 protein=signal recognition particle protein protein_id=ACU79808.1 location=444359..445702 gbkey=CDS	815.7	835	762	283.2	325.7	288.2	3	3	547.738	701.187	584.012	513.88	581.883	515.991	MMCAP1_0360	MGFGDFLSKRMQKSIEKNMKNSTLNEENIKETLKEIRLSLLEADVNIEAAKEIINNVKQKALGGYISEGASAHQQMIKIVHEELVNILGKENAPLDINKKPSVVMMVGLQGSGKTTTANKLAYLLNKKNKKKVLLVGLDIYRPGAIEQLVQLGQKTNTQVFEKGKQDPVKTAEQALQYAKENNFDVVILDTAGRLQVDQFLMKELDNLKKKTSPNEILLVVDGMSGQEIINVTNEFNSKLKLSGVVVTKLDGDARGGATLSISYLTKLPIKFIGEGEGYNALAAFYPKRMADRLMGMGDIETLFERAVENIDERSIQKTMNRMFLGQFDLEDLRNQLAQIAKMGSLNKLMKMLPINKVSESQIQDAQRKLAVFSILMDSMTLKERRDPRVLKAISRKNR…
CP001621.335	locus_tag=MMCAP1_0361 protein=conserved hypothetical protein protein_id=ACU79329.1 location=445706..446173 gbkey=CDS	78.9	71.3	67.6	40.2	35.2	43.1	3	3	52.981	59.8738	51.81	72.9448	62.887	77.1659	MMCAP1_0361	MKIKIICFGKLDKKFYIEAFNDYFKRLEKYADIEIIELKEEINGELNKIKELNSDLLLNKLESYKDFEKVILDVNSKLISTENLVDLIQTNLNYKNAKILFVIGPSDGYSKKFLNFFNNKISLAKITLPHQLCRIVLIEQIYRVFKIIKNEKYHK
CP001621.336	gene=rpsP locus_tag=MMCAP1_0362 protein=ribosomal protein S16 protein_id=ACU79151.1 location=446264..446542 gbkey=CDS	9024.4	7292.2	8804.1	527.1	592.4	535.7	3	3	6059.84	6123.58	6747.64	956.448	1058.36	959.113	MMCAP1_0362	MVKLRLKRIGKKQAPFYRIVAADSRINRNGQYIELVGTFNPLKDEVKIDKELTLKWLNNGAQPTDTVRTLLSKQGILKALHEAKFSKNTEKK
CP001621.337	gene=rimM locus_tag=MMCAP1_0363 protein=16S rRNA processing protein RimM protein_id=ACU79522.1 location=446574..447068 gbkey=CDS	83.2	81.6	88.6	10	7.4	30.5	3	3	55.8684	68.5232	67.9048	18.1455	13.2206	54.607	MMCAP1_0363	MNANLIKIGVIVNTFSIKGQVKVILNDDIMIDDLNKIDTFFIKTNNNFQVLRVQNITLNKTKNQLIVKFLNLDNINDVIKYKNQEIYCLKDKNISQIISLIGFKFVSLKTNGIISDYMNNTYQQLVKVKSENQKEFWVPLVDVFIKEIDYQNKVIIAKDVEGLK
CP001621.338	gene=trmD locus_tag=MMCAP1_0364 protein=tRNA (guanine-N1)-methyltransferase protein_id=ACU79073.1 location=447070..447792 gbkey=CDS	272.4	181.6	202.5	25.3	17.9	12.9	3	3	182.915	152.498	155.2	45.908	31.9795	23.0961	MMCAP1_0364	MKFSIITLFPKIINSYIEESIIKRAINKQAIQIEVIDLRDFSTLSHNQVDDYQYGGGSGMVLMIEPLIRAIESVKTTNSIVLLTTPQGKTLNQSIVKKYANNDEHIIIICGHYEGYDERILDYIDDEISIGDYVITGGELASLILVDSISRIIPNVIKQESHENESFENNLLDHPVYTKPYEFRNNKVPDVLLSGHHQNIKKWREEQQVIKTLKKRPDLIDVNKLNKHQLEIYKKMKGEQ
CP001621.339	gene=rplS locus_tag=MMCAP1_0365 protein=ribosomal protein L19 protein_id=ACU79662.1 location=447794..448177 gbkey=CDS	11835.5	10767.1	12061.4	3706.9	3591.5	3502.7	3	3	7947.48	9041.61	9244.1	6726.34	6416.44	6271.21	MMCAP1_0365	MSSKATKTVKSKFDIINNQLRNDLIDFRSGDTIRVDVKIKEGDKFRIQSFEGLVIKTQGSGITYSVVVRKMSNGVFVERTFPLHSPIIDSVTLIKRGKVRRSRIYYIRNLSGKAARIKEIMPTKQAK
CP001621.34	locus_tag=MMCAP1_0035 protein=conserved hypothetical protein protein_id=ACU79079.1 location=49636..50829 gbkey=CDS	52.3	55.9	53.9	71.6	74.8	73.4	3	3	35.1192	46.9417	41.31	129.922	133.635	131.415	MMCAP1_0035	MKKLLTMLSISSSIFLIGTGIILSSKDNYSSMETISLNVNYLKRHKITGNKLEDIGYYKEGNLVRIEHIPYNVEIIACDLPREITSLKNAFVTRTNDIKWTVKWDTSNIVDMSGTFYNTREITDKSIQDWNTSKVTNMSEMFAYSKGFNLDLSNWDVSKVKTMEKMFLSAEKFNNGEKPLKWDNKLNEVTNMNKMFYNASSFNQNLNSWILKKNVKKDNFGLEESKQPMWKVEDTTSSATSPSAVQPDNSSNISPRSDEIIEHNSTSNSESELNGMSPRDSENNNPIEDIINEINNQPLNDEDNNHSTTPKTENETTETEKTTNDSSSDLKNDIYTIPSKPNTINSSKQKSSKTLAITTGVLGSATILGVGSGVSYYYRKSLKEFYLKTKNKIFKSK
CP001621.340	gene=ylqF locus_tag=MMCAP1_0366 protein=ribosome biogenesis GTP-binding protein YlqF protein_id=ACU79695.1 location=448276..449226 gbkey=CDS	451.1	229.2	435	224.2	218.2	213.2	3	3	302.911	192.469	333.393	406.821	389.828	381.712	MMCAP1_0366	MSAEFNWFPGHMNKTLKDIEARIEMVDVVVEVIDSRAPYSSKNTTFKKLLKDKPIVYIFSKADIADSKITQQWVDYYVKNENSKVIVLYNRHTDIVNDLINVINELTAKKREKDKAKGIKNTLINALVIGIPNVGKSTFINRVIKGKNVKVGNKPGVTRGIQLIHLNPFINLLDTPGVLPSKLESETVAVNICAINSIKDNVFPKERVAAKLMSYVYNNYDDVIEKYYKINLKLQKPISVIDSYKIFETIGIEKKWYVTEDILDMERILSSFLRDLEKGKLGKISFEKVLEVVPEEIQKAINPEDNKQGNDISSLW
CP001621.341	gene=rnhB locus_tag=MMCAP1_0367 protein=ribonuclease HII protein_id=ACU79364.1 location=449220..449843 gbkey=CDS	32.1	26.8	35.4	6.4	1.6	NaN	3	2	21.555	22.5052	27.1313	11.6131	2.8585	0	MMCAP1_0367	MIDRKLFDDQIKLDHNITYLSGSDEAGRGCLAGPLVVASVILKADYFNPLIKDSKKLNPKTRQLLFDEIIKNCLDYQIIVISSKQVDELNPLQASLLGFKTTISNLKITPDLGLIDGNQNINLENIKTLSIIKGDDKSFSIACSSILAKVTRDKILDQYDQIYPNYGFKSHKGYCTKQHLLAIQKYGILDIHRKSYKPIKKISKETS
CP001621.342	locus_tag=MMCAP1_0368 protein=conserved hypothetical protein protein_id=ACU79566.1 location=complement(449865..451661) gbkey=CDS	180	153.7	162.1	57	47.3	47.9	3	3	120.869	129.069	124.237	103.429	84.5044	85.7598	MMCAP1_0368	MSKKYVIIGAGLTGTLLALEIRRRDKKAQIYVYDKEETDFMDPSNYNNWDYFGYLYQETKKNDNLISYNPKYFKEKYDINVQLGTSTYQIDDQNQEVLFRKIWGSQIIKQDYNYLIICKELKADFSLLPYGFHSVPPIKNFYLIRTQDEIKWLIEYFNKNNIKDVLVVPGNLLGLKVAKNLSLANKNVSLIQIGYPTLTQINYQILDALDYDMVQMLNKDLIDHNVELILKDYISEFYDDKVKLLISDKEIKPQAIVYTNISLDPFVVSPFQKNPNFLYPQIYNKNNKTKKLAIYNEKQIIVNKNYKTNLKNVYAIGNCIKLPNCMINTEKTELQVDTIKKQINNLLNHIFKKQIKPNKIITQTSYFKLFDFNVCYTGLNKKECNSLKINYKTAHVIST…
CP001621.345	locus_tag=MMCAP1_0371 protein=ABC transporter, permease and ATP-binding component protein_id=ACU79080.1 location=453587..455458 gbkey=CDS	132.1	211.8	160.6	203.1	188.6	187.1	3	3	88.7045	177.858	123.087	368.535	336.946	334.982	MMCAP1_0371	MKVKNNFDHFYKPMTDEEIKADRKSFNRGRKSFINVIWKHMKINKKWAIGLLITAIFSALFAALNPLLMQQLQFAVEFEKTHQNFSNSWGLSWKVILAIWIVILVITAILTYIANLFGNELGKKIEISLRNELTRKLITTDIHYYSNKKTGEILTKVVSDTQIIGMQASVIPNIIFTAFFTMVFTLITLFITTSLYIGLFFISLFLMFGILFGLSFLPMRKLVFNLRKIITDINGDVTDRINTIKLIKANGTEEYEKTRFVQIHDVYYKKYKQISYFQSVMISILFFAINTVQILMTLIALWLYKNDITTLKTILGPMLICAGMLIGPIMQLLRAIIGMVQASTSAQRIDEITDATQLINNHSLDKKGIRIHKIEGNLVFKNVNFSYPDKPENVILPNF…
CP001621.346	locus_tag=MMCAP1_0372 protein=ABC transporter, permease and ATP-binding component protein_id=ACU79143.1 location=455474..457327 gbkey=CDS	141.9	231.8	198.9	320.8	323.7	335.1	3	3	95.2851	194.653	152.441	582.107	578.31	599.96	MMCAP1_0372	MSKVKKVYTKIKKKWSFDNKGKFTFKKFSLFIRMNVEIAKQNPLLFFGVVFFTSLDAIFSAMLPLFSSKVINTLVENNTQWLFNWMELNSTGWLYVIGINLLIIIICEYFTNFTVALYSAQIEVMQRLKILKALTDQDVDFYFDHVSGNILTRLVGDTQFLALGVQQFLTNLIYALSGSITAIIIMYSQNLIMIATLALIYLLVANLFCIGFFIDMRRKLILAFDVKRETDADMTDRINNISLIKASGTEEFEIKRLEEKNQNYEDGLTKFTYSSALLNTSLTFVIQLLIPIIFIIIAVQYLTNSQSSNNLGAEIALIFPLLSTLIGGIAILLPSLRSATAASNAANRISELTDPKPMIHSNLKGYKIDKIDSIVFDNISFSYPKKPERIVIPPTYLTF…
CP001621.347	locus_tag=MMCAP1_0373 protein=conserved hypothetical protein protein_id=ACU79645.1 location=457361..458968 gbkey=CDS	92.2	83.3	89.9	32.8	42.4	36.5	3	3	61.9118	69.9507	68.9012	59.5171	75.7502	65.3493	MMCAP1_0373	MPVQESIYWVYFHDMVKKIKTDRFKKVDELLKKKINEIFEITHYGLFQYQILKDKPLINIDDSSISEICKYITNNYLRFFEYLNYNNSKTSVYSSKLTKNELEEISFIIENISIRYIADNLILTNNNNYNSDFLTLLLIELSKMHRFDTNFLARNNDKIVYHSLVYPLFLTMLVIDITNEAQMFNNIKKIYTKQNILNALKSGRPLSSNELNYFKSHIDILEYDEEWNTFLLNFKQENWTSFSVEKKYKLVFQLAKYTALFLKDRIKSVWALSDGEEIFDSFYNYINLFLINKTSNQTSTIYLTNKIDPLNKNYDDSDRFLLPFLIKDYNPIQIGHHISSLKDYSKFVCDKDRIIDFLDAVLLSTNYINLIDILKVDSNYLADFLIQRKKLALVDTLNL…
CP001621.348	locus_tag=MMCAP1_0375 protein=conserved hypothetical protein protein_id=ACU79115.1 location=459154..459894 gbkey=CDS	58.4	43	51.6	2.3	1.4	2.2	3	3	39.2153	36.109	39.5473	4.17346	2.50119	3.93886	MMCAP1_0375	MKNYYEQTLDQIRDLIDNNKFDKALKLINQELEISYIPTDFENSLYKFLKEIKEKQATNLNKTYSVLEIKNLLNSKNQLDQIIAIKNLININIRLIIDDIINYLLNLENVYENKALLLISLADQQIDWNFDVVKNKNTSFKINPILLNTNEIFNTYYQIEQNILDCIDQKNIFLNQTCKQILFSYFIYSFPYVEILKSSETIIAVIKLSYQLNDLEFDLKKLNKLIEFDDKKVDKIIDEIKKTGVF
CP001621.349	locus_tag=MMCAP1_0376 protein=conserved hypothetical protein protein_id=ACU79190.1 location=459896..460210 gbkey=CDS	68.5	60.3	63.8	16.3	5.5	19.6	3	3	45.9974	50.6366	48.8976	29.5771	9.82609	35.0917	MMCAP1_0376	MNNINFDPKNYKYFKDYNFFMVKFFNITCSLCDSYEISFVTNQSPIPIGSLIKKQTKKLSEKEVEQLVNEQIVIWDKLEENNYKKNIPTFLCDECWNTLTNQCN
CP001621.35	locus_tag=MMCAP1_0036 protein=D-lactate dehydrogenase protein_id=ACU79576.1 location=51138..52124 gbkey=CDS	12416	8622.1	9320.4	2985.8	2938.7	2907.9	3	3	8337.28	7240.36	7143.34	5417.87	5250.17	5206.28	MMCAP1_0036	MKVIFFGVRDSEVQFFEKLKNKYNYELTLAQGVLTLDRIDLIKDHNCVIVRGADKLDKTLLQAIKDQGVEYVFTRTVGFDHIDIPTGHELGFKMARVASYSPTAIAELAFSLAHSLSRKSSYWAYQSVNKNFKMDQYGFSKELKNSVVGIIGTGRIGYEAAKMFKAFGCEVLGYDIKPNNNFEDVIKYVDLDYALANADILSFHMPYIKGQNDKLINKELISKMKDGAILINTSRGQIQDEQAILDAIKSNKLAGAGLDVWNTEKDYLFKTLDSIDDPVIKGLLDLYPKVLLTPHIGSYTDEAASNMIEYSLDNLNEYLTTGDCKNKL
CP001621.350	gene=cgtA locus_tag=MMCAP1_0377 protein=Obg family GTPase CgtA protein_id=ACU79283.1 location=460281..461582 gbkey=CDS	791.3	609.3	583	203.3	200.7	219.1	3	3	531.354	511.656	446.823	368.897	358.563	392.275	MMCAP1_0377	MKFVDFADLIIKAGKGGDGAVSFLHALFVPNGGPNGGDGGDGGSVYFLGDEGKHSLLDLKLQKKYSAQDGFKGDIKNMHGAKGEDKIIKVPVGTILYDKKTNTILADINENNKLVLIAKGGKGGKGNARFANSRNKAPTIFEAGELGQEFEIRAELKVLADVGFVGLPNAGKSTLLRAISNSKPVVADYPFTTITPQLGVARTKNNDTFIVADLPGLIQGASLGKGLGHQFLKHIERCLVICHIIDASGNFGSEDIIKNYELIRDELKAYNLNLEKRPEIIVLNKMDLDEAQLNLLDEKIINYFKDKKVVRISGLKKENIDQLLFMIYEELKVAKKQPLWELDKNNDQDEIAIYKFEEQKEDIQVYNKGNNRWEIAGETIFKIYQKFPIWTEDNLLMFN…
CP001621.351	gene=nadE locus_tag=MMCAP1_0378 protein=NAD+ synthetase protein_id=ACU79388.1 location=461584..462321 gbkey=CDS	753.7	703	852.3	32.9	22.5	27.3	3	3	506.106	590.34	653.22	59.6986	40.1976	48.8777	MMCAP1_0378	MQTNLKQYLDYLVEFIQQTVKKAKCDGVVVGISGGIDSAVVANLAKLAFPNNYLTVWMPIYSSQLDYDCANELIKTNQLKNIEVNLEASFDAFKNSFSNLDEKPNLLAISNAKARLRMTTLYTIAQTKKYLVLGTDNLDEWHIGYFTKYGDGGVDVVPIIHLLKSEVKKAAQILNVPEIIINRKPTAGLWEGQTDEGEIGFSYDLIDSYLLKQNNDPELKKRIDYLHKISKHKRSLAIKPKKIIR
CP001621.353	locus_tag=MMCAP1_0380 protein=putative nicotinate-nucleotide adenylyltransferase protein_id=ACU79441.1 location=462634..463731 gbkey=CDS	296.8	221.5	229.1	23.6	20.1	20.7	3	3	199.3	186.003	175.587	42.8233	35.9099	37.0611	MMCAP1_0380	MSKKIALFGGSFDPIHTDHVNIIKTCYEKLKFDEVWLIPAYLNPFKTKQNSSIVDRLNMLEIIKNKFSYIKIYDYEIKNNKSTPTYQTVKHILKTNQNDHFSFIMGSDQLDRFEEWNNFEELIKMIDFKVFKRNEDYNKQVLNKYNLELFEFENNYLSSTDIRNLKHLDKQIKEINDYVNYNLMYLYERLETQMDQKRYIHCLNVGKMAHDLAIKWNVDPKKALIAGTLHDITKRWSKEQSLNYLKTYLPQLINEPYPVWHSYTAYLHLLYDWLIDDKEILSAVFNHTVGSENMSLLDIIVFCADKISIERDYLGVDKLRELCFSDLMLGFKTLLKNQYDLAIKKHGKDNIGSMLIKTINYYLKD
CP001621.354	gene=mtnN locus_tag=MMCAP1_0381 protein=MTA/SAH nucleosidase protein_id=ACU79554.1 location=463736..464395 gbkey=CDS	694	310.3	563	49.2	51.3	51.8	3	3	466.017	260.573	431.495	89.2757	91.6506	92.7423	MMCAP1_0381	MKLIISAMYEELAYTLKKTNAQLIIDNDILKLYQYQNILLAISKIGLVNASCCLSYILNHYQIDQILNIGTCCSLNQEYKQNDIVIVNKAYYFSVDVTGFSYSYGQIPKLPKYFLANNFLNLSLDYKICNIASGDVFINKSEHLTQFINKINDKIDIVDMEACSLFHVAYLYKRPISSIKVISDVMFVSDSNMLQFDQFINKASKKIYQILNDLYFKID
CP001621.355	locus_tag=MMCAP1_0382 protein=deoxynucleoside kinase protein_id=ACU79656.1 location=464405..465043 gbkey=CDS	206.3	146.1	151.7	27.2	29.3	43.9	3	3	138.529	122.687	116.266	49.3557	52.3463	78.5982	MMCAP1_0382	MRIAIFGTTGAGKTTLLENLKKLLDSSYVFINETSLDCPYFNKAYDDTNKNVQDYNYKLDLWMLTDRMKTFIKYKDHQNVIYDRSILDSMVFSQTDHMYNRLSDTDYNVFKDYFLTCILPNIFDIKNNWKTFDVVIYLKVDPYKAIQRINKRSRDVELDTNDLFWLNLTNAYEFWYNIYKEVVPFWVIDANVDDPNYIATSIANMIKNIDNK
CP001621.356	locus_tag=MMCAP1_0383 protein=putative liporotein protein_id=ACU79708.1 location=465165..465884 gbkey=CDS	827.3	1036.1	787.5	915.3	932.8	950.1	3	3	555.528	870.059	603.556	1660.85	1666.5	1701.05	MMCAP1_0383	MKKILTLLSFITVLSSSLIVVSCKTDNTNQKIKEKENKTDSNKKETETPNNNLNPSEKELPKDQPNTKEDKNEKIDDFAEKIKKELKEVLDTKESSKILESASGLISKFLQRSSQKQSLEQLTNLENKISKLFDESKFDDVKTEITLLFSNSLENSNANDIEVKKLKELLDKVSKENKKVILETTIELLGKKISNEFEQELKTRINEINSLLTKKDYDSIKTKLFDIVDKSAKLEKSKI
CP001621.357	locus_tag=MMCAP1_0384 protein=putative liporotein protein_id=ACU79107.1 location=465961..466698 gbkey=CDS	76.9	98.2	89.9	767	737.4	795.5	3	3	51.638	82.4629	68.9012	1391.76	1317.41	1424.26	MMCAP1_0384	MKKILTLLSFITALSSSIIVVSCKVDNTNQKIKEKDNKKDNKNDSNQKPKELEKPNGSLNPSEQDLPKDQPSTKKEKDEKTDSFADELKKDLKKILDKKEDLKIREYSTKLISKYFQKSSEKQLLKDWFDLEEKIKKWFDESELDDIKKEITILFSESLDNNSNNQESRKLKDLLDKVTKDNKEGILEEVKNLFGQKISKELEEKLKSETDEINNLLFKMQYETIKTKLFDIVDKTAELEKNIKQ
CP001621.358	locus_tag=MMCAP1_0386 protein=putative liporotein protein_id=ACU79387.1 location=467427..468272 gbkey=CDS	25	34.8	34.1	201.9	212	203.3	3	3	16.7874	29.2231	26.1349	366.357	378.751	363.987	MMCAP1_0386	MKKSLFALSFLTILSSSVLVVSCRNNKVYSNSEHIKDNSESKNKHNNQNNTDSKNDITIKNPINKEDQPKHIDENSNKNPETKKEENDQIDNSRNQQNDQPTEKEPNSDGLEKEKERVTSLLKDLSKTSEIKYLGEELIFTKQDLYSQKIKNEEWRKYKQRILKLFEEKKFNDVKEELLKLLKELLDIVQNKRPFEEKQKTYKDITINESLKDSILVELRFLFETKFSINQKKEADEVINKFNEEIEKLINNKNVKELEKKLIDLIKENKKLEIELKDISN
CP001621.359	gene=trmU locus_tag=MMCAP1_0387 protein=tRNA (5-methylaminomethyl-2-thiouridylate)-methyltransferase protein_id=ACU79271.1 location=468380..469507 gbkey=CDS	251.6	183.1	215.8	74.1	1482.8	83	3	3	168.948	153.757	165.393	134.458	2649.11	148.603	MMCAP1_0387	MKQKVVVGLSGGVDSSVACYLLLQQGYEVEGLFMRNWDSATNNDILGNININNDICPQEQDYLDAKAVADKLNIKLHRVDFIKEYWDYVFLYFIEEYKKARTPNPDILCNKYIKFDKFLNYAINQLNADYIAMGHYAKVEFNKTTKQYELFKASDTNKDQTYFLSQLNQNQLSKTLFPLANLTKEQVRKIALEQNLITANKKDSTGICFIGERHFTDFLQNYIPSQTGNIVDIKTNKVLGQHIGIMYYTIGQRKGIHLSGMSEPYYVADKDVEKKILYVCSTSDQSYLYSTSCFVNDINWILDLSKYVSDVNQFKCQAKFRYRQNDNNVVVKKIDDNNYQVIFEKPLKAITIGQQAVFYLDDICLGGAVIDKVVK
CP001621.36	locus_tag=MMCAP1_0037 protein=malate permease protein_id=ACU79045.1 location=52143..53267 gbkey=CDS	828.2	997.2	1025.8	178.3	187.6	178.6	3	3	556.132	837.393	786.194	323.534	335.159	319.764	MMCAP1_0037	MNGVKEAFIQTMTNQKLWGAIVATIVTILLSYGLTKANILKKEWKAGLVKVVMTIAVPALVLTGFMKTANIQQLKEQGVVLGVSFAFYILLNVIAFLWSKFAPNFAKKSAEMIQDNKALNSDGSMSQSRALIMWMMIIFGSTTFFGFPIIQAIYPNSGFVAANIWNIAYRVFLYSFCFMMISGVKWSKKNFKDAMKKTFVNPIVICTFLGLILWLTTLIPGQSFGENFKTVEKGGVAWFEFGKTLPIIHTPLQKLGALAAPITWIAIGITLASSDIKKAVKDKWVWIFSIQKLVLLPLFVFLIFLALNKTGVVSKEVAVSMVILAATPPATVVVLYAIQYKMRDEFAAQCSTLTTLLAVIMLPLWVVISSIAFI
CP001621.360	locus_tag=MMCAP1_0388 protein=conserved hypothetical protein protein_id=ACU79159.1 location=469554..470171 gbkey=CDS	96.3	285.7	168.1	542.1	489.2	464.3	3	3	64.665	239.915	128.835	983.666	873.986	831.279	MMCAP1_0388	MQTSTILMIVLLVFVVGFVIWSTITGKKANKKEKEKRYNQVREKIKEYILKNEHKKNLRIEFEKVYARKGAEYKYRDVFDVIVQLIEPKTQKVIEIRAYEVEGLTTKVNKSQYNTEWIVNSQIDLEETKRRIAIGEKTIKLTKAEKQKLKEVEKIQAKKLAQQEKEQLKKAKEKQKSQKGSLDIYQERKLNISNKKFVPSRAKSN
CP001621.361	locus_tag=MMCAP1_0389 protein=conserved hypothetical protein protein_id=ACU79040.1 location=470247..472391 gbkey=CDS	37.5	37.9	42.2	9.5	7.8	13	3	3	25.1811	31.8263	32.3429	17.2382	13.9352	23.2751	MMCAP1_0389	MNSIFKINISKEIFKIANLKCIKIAWILQNINNFKKAVEWNKTKKYFFNIDHDLESEDDFSSDSTSINLFEEYTNTDLKTEQERAEFLKKWESFFNSDDGFRLDEFKGDAIEDGLEFGKKVIEYFDLKQIKEYPNKLTKDFNDTANIYDAVNQTKELLKNHQDQYVYLYEPAFEFDNFNLKVKCDVLKLNGDNHVEIIEAKATSKVKKEHFWDLVYQVYVLERNGFIVDNIAIARLNKNYLRDYDSNVDFDLKTSIEEFASQYKDINFDQAKKIVDNIDDLDLGFKNIDEIDDLDLNKLIEIDYFTYGQAKTRNTLIEDYKNLINVVDIDELFLKIAYMLRLDENQIIEIFKNDSCYLHYDKKGKNWIKWTREISDYKACQHVLDWFDEKAPNFWHFGG…
CP001621.362	gene=fmt locus_tag=MMCAP1_0390 protein=methionyl-tRNA formyltransferase protein_id=ACU79779.1 location=472381..473334 gbkey=CDS	482.7	348.8	398.8	181	187.1	116.4	3	3	324.131	292.903	305.648	328.433	334.266	208.402	MMCAP1_0390	MENKIKIVFCGTPKIGADVLKALIEMNQVEVVLVISQPDKPIGRKKQIVYTPVKKLALENNLKVVQPNKIGEIYDDLAKLEFDFLITCAFGQFIPTKILKLAKIDSINFHGSLLPKLRGGAPIQYAIKNGDKKTGITIMQMVKQMDAGDYYVQESIDILDSDDSGSLFEKMGQLAYSMCKKYLVDIYNHKFELIKQNEDEVTFCKNISSEEEKINWNNTSLDIFNLIRSLSPSPISYTTINNQRYKIKSSKVIDLDNQNKNVMPGTIIDINKQGIVVKTLDKALLILEIQKEGKKMILASNYYLNKLSDLKINDKFD
CP001621.363	gene=efp locus_tag=MMCAP1_0391 protein=translation elongation factor P protein_id=ACU79675.1 location=473421..473975 gbkey=CDS	451.6	404.3	516.4	93.4	105.6	101.2	3	3	303.247	339.509	395.779	169.479	188.661	181.188	MMCAP1_0391	MSVNDLRPGTTFLYDGNIYLVLEQAFSKTGRQQGKVTVKAKNMRTGARVELTFTGGEKVDKAMIERKEMQYLYNDGNDAYLMNTETYEQVSIPMTRLEWEKNFLVDGLMINMTEFENEVLGIDLPVKVELTVVEAEAAVKGDTTSGAQKKAILETGLEIMVPLFVNQGTKIIVSSADGKYVGRA
CP001621.364	locus_tag=MMCAP1_0392 protein=conserved hypothetical protein protein_id=ACU79578.1 location=473993..474295 gbkey=CDS	604.4	560.4	615.8	313	330.1	349.5	3	3	405.852	470.593	471.962	567.953	589.744	625.742	MMCAP1_0392	MYIDIEKNSKGNLKIESKVINRLVENVILSMTKISDPKNVSSSIYVLDENQLHILATIKIGDEKLQDLNINEDKIFKAIDKTINQTISMKPKNINISYIR
CP001621.365	gene=tig locus_tag=MMCAP1_0393 protein=trigger factor protein_id=ACU79686.1 location=474312..475598 gbkey=CDS	5408.9	4198.3	4482.1	1304	1325.2	1352.9	3	3	3632.05	3525.5	3435.17	2366.17	2367.55	2422.22	MMCAP1_0393	MIFAQEKFVDQGQGKWTVTIQDDQWTEFLKKAKNRLKANLVVPGFRKGKAPESETAKYLTPIKIYNEAFKIVVKPAFDFALSQENKIQNDNSPTPVIVKVSDKEIVIDFIFDLVLELKVGEYKNITTVKKPVVEVNQEDVDNVIDMYRSRFAMQKEKQADDQIQKGDIVTFDFKGYVDDQAFEGGEAKDFVLEIGSNQFVPGFEDSMIGLKVGENQEINVKFPEEYIPSLAGKDAKFVLNIKNIKEKILPAKDDELVKDLNLPDITTYEQLEQKVKQDVLEQKTKISKSEFVESIIDEIIKNSEFQIPKTIIERQIKDVKKEFEDQLAQQKITLDKYKEITKITQEEIDEELKSDATHRIKSFLVASEIKNKENIVASEEAINAKFEEFANLYGIEAEK…
CP001621.366	gene=lon locus_tag=MMCAP1_0394 protein=ATP-dependent protease La protein_id=ACU79119.1 location=475721..478081 gbkey=CDS	2560.1	1766.3	1981.5	201.2	204.4	231.9	3	3	1719.09	1483.24	1518.66	365.087	365.173	415.192	MMCAP1_0394	MKTIKLPVVVTRGIFILPSTSKTIEFGRVKSKNALNASADLYNNQIVVVSQESPLEEEPNLEHLFYLGTVADLSVKKVWKDGTISVELNYNQKIKIDEFVEEDNIIYAIGSVFEDKLPKTDAQKTKIKEALEELQEKHSFNTSELLLAFNENDFNKLNSLIYQIIDKMPLVSLNTKLLLIQSTSILEKLDLLKELIINRPKSTVKLNNNLNNNSTVDSEINKKLKDKMDKQQKEYYLREKMRIIKEELDDENSDASQLDKYKKRLEEEPFPESVKEKILSSIKRIETMQPGSAEVNVERNYVDWMMSIPWWEQSEDIDDLKYAQEILEKHHFGLKKVKERIIEYLAVKQKTKSLKGPIITFVGPPGVGKTSLARSIAEALGKKFVKVSLGGVKDESEIR…
CP001621.367	locus_tag=MMCAP1_0395 protein=recombination factor protein RarA protein_id=ACU79201.1 location=478180..479415 gbkey=CDS	107.5	77.4	87.8	20.1	12.2	17.4	3	3	72.1857	64.9962	67.2917	36.4724	21.7961	31.1528	MMCAP1_0395	MNQPLSFLLRPKTTKDIIGQTEILKPNGLINKMILNDYCTSLIFYGPSGVGKTSFAISLANDLKIDYEIFNASYDKKEKLTSIIQKALLQDRFILIIDEIHRLNKDKQDILLEYMEKGNIFVFSTTTENPFFVINPALRSRSLLIELKTVNKNELISYAKKIIDQYQLKINISDEALDFLAQLSVGDVRTFLNYLELIDRLYSDEFIDIKKIKTIITVSKNPTAQDSDDFHDLKSALQKSIRGSDVDAALYYFSRLIETGDYESLMRRMIIISYEDIGLANPAIPSRVVQACNAFRQIGFPEGIIPLGLAIVEMSLSLKSNSAYLATNSALDFVKNGNIYNVPKHLKDNHYKSAVKLGIGIDYKYPHDYENDWVEQQYLPDEIKNKKFYNHKNNQYESK…
CP001621.368	locus_tag=MMCAP1_0396 protein=putative liporotein protein_id=ACU79265.1 location=complement(479444..481669) gbkey=CDS	95.1	106.1	106.7	255.1	228.1	290.3	3	3	63.8592	89.0969	81.777	462.891	407.515	519.751	MMCAP1_0396	MRKLQNYLKLLSLGSVVVLATTTISCNINNSNTKNNLVIPTTNKNPNNNLNPGNSQTSQNNRTPENQNIEPSSNEDSSSNNNNSNIDSNNSYPETIDHTDNNDFSNNITHFSTISNLNYSLSSLDNNYLEYQEKDFQPINVEESKIKEILLNDTLPLNFYSHPKYKPEKQNIFINPNQSTKLKLVDSKNNTEVKDEVKWYQRLRYPENQILKAGEDKNDKLTLLSDGTVTGKSHTKENDPTTLIWAEYKGYLYPFFVEVSSQHHYNGESDKEKAKKVAQELAQQWKELPTLEKITKAYEWMTKEVKYDPGYQTNSIYKDQTAYSALVEKCTVCTGYAKGFKMIMDELSIPCIVMEGQSTRDFWAARHAWNLIEVDGEWYHVDATSDRTNNEQTFNFFFN…
CP001621.369	locus_tag=MMCAP1_0397 protein=putative liporotein protein_id=ACU79738.1 location=complement(481720..484011) gbkey=CDS	51.4	49.8	38.3	30.4	26.4	28.5	3	3	34.5148	41.8193	29.3539	55.1622	47.1652	51.0262	MMCAP1_0397	MKKLLKLLSLSSIISLTTTTISCSVNNSNTKNNLVIPTIPTTNKKPNKPNNNLSPNSKNNQNYNNNSTFKNEDFKPSNNDSNQGSNHNNSDNIDDNNNSSSNDIIGRIDNDINNGHTYFSSISRLNHNLTELENKYINFENKSFQPIDTNENQIKEIILNSQLPTNFYSHPKYKLQQTHIILDEFQNKEVKLKLMDVDSKSEIQNSDIKWYQKISYPQNKVLDSKESQENGTFILSDEGTVKWKDTKSTNEEFGPEEKSARLWASYKGYLYSAIVTVYSSQKSKTLNNENEAKKMAKEIVEKNGWKNLPTLEKLTKAYEWITKGVKYDYDFTTGPILKNQNAHSALVKRYTVCTGYAKGLKLLLEELGIPCRFIEGHSERESRLSKHAWNLVQLDNEWY…
CP001621.37	locus_tag=MMCAP1_0038 protein=conserved hypothetical protein protein_id=ACU79266.1 location=53623..54906 gbkey=CDS	187	122.8	149.5	25.2	18.9	29.2	3	3	125.57	103.121	114.58	45.7266	33.766	52.2795	MMCAP1_0038	MKINNDNYMPRIMDKIIQKYLKIAGAICVEGPKWCGKTWTSRQNSNSEFLVGSAANAFSNRQLAILNPEYVLKGDFPRMIDEWQEVPSLWDATREEVDKYSKNGLFILTGSSTPTHKGVLHSGAGRIVRLRMNTMTLFESGDSTGILSLKDLLLDEIKTEYVDELDFKKLAYLIVRGGWPKNIKTSFDNCEVLPRSYIDSILESKLLDENNNAYNSNYIKLILKSLARNVSTTVSERSIINDISQNEVDSISRPTLSKYLDFLSNMFLFSNLEPYSLNPRSSLRVKQQEKKYFCDPSLACALLDLTPNKIMDDLNLYGLLFEGLVIRDLKVYAQANDAKVYHYQDYLDNELDAVIEFKNGEWCAIEIKLGLNQVEQAAKQLNKAIDAITRIKNKPPINK…
CP001621.370	locus_tag=MMCAP1_0398 protein=putative liporotein protein_id=ACU79854.1 location=complement(484051..486513) gbkey=CDS	44.9	95.2	75.3	111.2	111.7	110.4	3	3	30.1501	79.9437	57.7114	201.778	199.559	197.659	MMCAP1_0398	MKKILIGLSTFSLLVSSSSIVSCTITYQFKNNYLDQLKMILNTSSIAAQSIILSDKNTTNISTDYSLKTFSQTKINDLYKNEEKKLADKYVIDKKATYEYQFKSMFLSLENQKWTETLKKITTIDKNNQTTNLDLAWNDQNTKTTDNNIFKTLSLASAGFNFLFSGDFTPNQQGDLINNFLSNQFGLLESTVFKDNQFSNLIDQLNNIDNNQFYNLTNSLLTQPEWLNSDKENNLTKKTLKEILESSSKKLWDQILPKDGKQDFKIDWSKVFKPLIDLLKAFSIYYEQVEQRSDKNLTYQTIDPLHLFIKEKTNSEFLYEVLNTDLQTIYKNKSEDQIKQEINSINLKKIISFLKNTLVFDKEDKHGYKFQKFVVILLGSASQKESQNDITNNFLLKPF…
CP001621.371	locus_tag=MMCAP1_0400 protein=ThiJ/PfpI family protein protein_id=ACU79612.1 location=491972..492523 gbkey=CDS	759.3	507.7	517.1	235.4	256.5	269.4	3	3	509.866	426.338	396.316	427.144	458.253	482.332	MMCAP1_0400	MKKIALYLNPGFEEIEAVTACDVLKRAGILVDMVSTIDSLEVKGAHNIVIKANKLWKELNINYYDGMVLPGGSGVTSLFDNQTLIDNILEFNKQNKLIASICAAPQVIGQTKLLDNKTITHYPNCNFYLDKANVVLDKPFVVDNNFITGASAGSSMLFSLAIVEYLLGKEKKEEIYKNLVIFG
CP001621.372	locus_tag=MMCAP1_0402 protein=putative metalloprotease protein_id=ACU79529.1 location=494410..494904 gbkey=CDS	72.5	70.2	93.5	43.9	42.9	39.5	3	3	48.6834	58.9501	71.6603	79.6586	76.6435	70.7205	MMCAP1_0402	MIRINYFNETDINMDFWKKFCNKILKTAYNYFNFNYDIELSITFVNDLKAQQINQQYRNHSYIADVTSFPVEMTENEIKAIGFRELGDMFINLSEAKRKAIKYNHDLNSEMGFLFVHGFLHLLGYDHEDLNDEKIMFDLQDQILKLNNLEYIIKFNEDDYLESN
CP001621.373	gene=era locus_tag=MMCAP1_0403 protein=GTP-binding protein Era protein_id=ACU79454.1 location=494908..495813 gbkey=CDS	348.6	294.1	304.1	89.5	68.3	79	3	3	234.083	246.969	233.068	162.402	122.022	141.441	MMCAP1_0403	MSNFKSGFVSIIGRPNVGKSTLLNKLIGEKISIVTNKPQTTRNNIRGILTKKDQYQIVFIDTPGVHTSKKQLDKFLNTSALKSTKDVDVILFLAPSDEVIGKNDLFLLKQIENLDVFKILVITKADSVTKEQLILKANEWSSYQDQFDEIIITSSITNLNIEKLLELIVNNLSDNDYQFYDDDILTDQSDRFMIKEIIRENILLKTGQEVPHSVAVLVEHLEQNENEINISCAIIVERQSQKSIIIGKNGVKISDIRYKSKKQIQALFKKRINLELFVKVQENWRNSPSLIKKMGYNKDQY
CP001621.375	gene=glyS locus_tag=MMCAP1_0405 protein=glycine--tRNA ligase protein_id=ACU79492.1 location=496626..497996 gbkey=CDS	698.5	552.9	597.2	163.3	165.8	169.8	3	3	469.039	464.295	457.706	296.316	296.212	304.009	MMCAP1_0405	MSKSIEKMISHLKNQGFVFQGSEIYGGLANSWDYGPLGCEVKNKLKKVWWDFFVKKNPLNVGLDSSIILNSKVWKASGHIDGFNDPLIDCKNCKSRWRADKLIEEFDSSINTGIMTSAQLEDYIKQNNILCKKCQKKDFTQIRKFALMFKTNQGVLEDDSSIVYLRPETAQGIFINFKNVQRSMRKKLPFGIGQIGKSFRNEITPGNFIFRTREFEQMELEFFFDPNDQRDWFKYWLDQIELFLTKKICLDKSNYKIRENLKDELAHYALKTSDIEFNFPFGWGELWGISHRSDFDLKVHQNLSKEDLTVLKEETNQKVLANVIEPSVGVERLMLAIFWQAYTEEQLEENNSRTVLKLPYNLAPYQVAITPLSKQLNQNANQLFLDLLNDFDAVYDETG…
CP001621.376	locus_tag=MMCAP1_0406 protein=DNA primase protein_id=ACU79615.1 location=498031..499869 gbkey=CDS	99.1	86.6	89.5	7	4.5	7	3	3	66.5451	72.7219	68.5946	12.7018	8.03953	12.5327	MMCAP1_0406	MVYISNEKINEIISQVSIVDVISSYLHLIKKGSNYLAICPFHNDSNPSLTISPEKRIYTCFSCKASGNVINFVKDFEHVEFLTALKTVCDKANISLDEFKNYNQPIKDLEAETIFKLNSEANNIFKTTLFSNLGIQALEYLKSRNITIEQIKKFEIGFASDKTNLVQKLLDKNYNSLDIEKANLGIITNSYTKDYFINRIIFPIKDENNQVIGFSGRSFTKDNEPKYLNTKENKVFKKSHLAYNIASALKISKSLKKIIVLEGFMDVISLSKIDINNTIALMGTSLSNYHLNLFKRHNLDVLLFLDGDDPGIQANIKISHQLLKEKINVLVIDNQTNNDPDELVNNNVEYLKQIINQPIHPVNYLIEKLWNKVDINNPNQIENFIKKVLNFIFDLNNEI…
CP001621.377	locus_tag=MMCAP1_0407 protein=RNA polymerase sigma-A factor protein_id=ACU79260.1 location=499872..501392 gbkey=CDS	1456.7	1157.7	1145.9	82.8	79.2	81.4	3	3	978.167	972.172	878.241	150.245	141.496	145.738	MMCAP1_0407	MAKFNNKSELKKIASFNDFLDYTVSFANKNNNEISSEDVLEVFANIFPNASDNESEKILDVLQQKGIVFSDLIDDDIEQEELEEVEEEIEDVNLEELEELENLEDLDDLDFDLDSTSNNLDDYDENVNDDLDEFKEAKSAAIKGRKSAKSSNHMKYRVGGISNETKIQDIIKTYFYKIGQAPILTKEQEIIYAKMAVSDDPEDVQEGRNKLIESNLKLVISVARKHLNRGLDFADLIEEGNIGLMKAVDKFEYEKGFKFSTYATWWIRQAITRAIADQARTIRIPVHMVETINKLARVERQLTQELGREPNADEIANRVGEGITGDKVIEIKKLSIEPVSLEKPFGDEDDTHFGDFVEDKDMVSPNEYTEKEILKEVMDKVFEDMPPREEKVIRMRYGI…
CP001621.378	locus_tag=MMCAP1_0408 protein=conserved hypothetical protein protein_id=ACU79103.1 location=501392..502069 gbkey=CDS	134.9	112.7	127.9	1.1	2	NaN	3	2	90.5847	94.6392	98.0251	1.996	3.57312	0	MMCAP1_0408	MLSFRLHQVAKLINNSTTIADIGTDHAYLPIYLVQNNKTKIAYACDINQKPLKIALKNVEKFGLTDQIFTILSNGLEFVKNKEILNIDYVTICGLGSQTILEILKNDHQKISNYIICSNTSVKNLRLWAVSHNYLIKYESFIYEDDHYYWLIEINKNKFSDHLEELEIEFGSKQFFNKNSLYISYLENEISNLNKISNQINPNNIKYLEIQNRINKIRKYIDVIR
CP001621.379	locus_tag=MMCAP1_0409 protein=NIF3 family protein protein_id=ACU79063.1 location=502056..502832 gbkey=CDS	29.6	37.3	51	40.6	39.8	29	3	3	19.8763	31.3225	39.0874	73.6706	71.1052	51.9214	MMCAP1_0409	MLLDNIISYLNQLFNPKKASNWDHVGFQFDYKKLNNINISKVLVCLDLTNDCLEFAISNQIQLIITRHPFIFNELKLEKKNPNKKQMIKKLNKHKILVFSIHTNYDSSIKQNLLEILNKKLKINSFKKYGKDKESNLFYLDQKISVNDLINDLKEVFSLNKIRLNSNINLNSKIKDFYLTSGSGASTMIENMLKNCTFITGEVKWDQWIYANSNNVNLIEIGHYAENHFIDDLKNKLQIKFKDIKIFNYDIKNQFIEK
CP001621.38	locus_tag=MMCAP1_0039 protein=peptidase, M41 family protein_id=ACU79379.1 location=complement(54948..56894) gbkey=CDS	1059	1627.2	1394.5	916.3	899.2	904	3	3	711.113	1366.43	1068.77	1662.67	1606.48	1618.51	MMCAP1_0039	MNKKKKKSTFWFWIILIVGFIILLSVISITSRGTTQNLTIEQLNSLFDQGKPFNNVVLQRNNIQGIDIITGWYNNGSGWTKFTVNTNPNAINGFSDAFKNFVWRSNTTRYTESSWFSLLSSLLPMLILILFYIGLFYFMAKGGAAGAGANGLFGMGKNKARREKSNVKFSDVAGIEEEKSELVELVDYLKQPAKYASAGARAPKGVLMEGPPGTGKTLLAKAVAGEANVSFFSIAGSEFEEMFVGVGASRVREMFNEAKKAAPAIIFIDEIDAVGRKRNSAIGTGTNEQTLNQLLVELDGFETNSGIIVMAATNRVDVLDPALLRPGRFDRVIQVSLPDIKEREQILKLHARNKKIDPSIDWHRIAERTPGFSGAQLENVLNEAAILMVREGKTVIGIN…
CP001621.380	locus_tag=MMCAP1_0410 protein=superfamily II DNA and RNA helicase protein_id=ACU79357.1 location=502841..504202 gbkey=CDS	301	337.9	323.6	101	96.7	95.1	3	3	202.12	283.75	248.014	183.269	172.761	170.266	MMCAP1_0410	MKFTDFGFKKYINDTLDQIEFIAPTSIQQKVIPLLKKHQNVIALAHTGTGKTHSFLLPILNNLKLEENDNYVQAVIISPTRELSLQIYQNTKLFLKNNPLINCNLFIGGEDISKNIEQLEKKQPHIVIGTPTRLKELYDLNKLRLTTTSYFIIDECDMIFDLGFIEDVDYLISKINQDVTIGIFSATISQQLSVFCKKYIKNAHFIDDSQNKISTSNVKHVLIDTKNKELEQSLIQIINSINPFLCIIFVNQKDEINKIVEILHKNNIKQVAELHGNLQPRLRLSMLKKIQNNEFKYLVATDVASRGVDIKGVSHIISINLPSDLTYYIHRSGRTGRNNSTGYSYIIYNLKNKTQIEELIKKGIEFETKKLIDNQLVDIKTNYKKVKVFKELDAESKQV…
CP001621.381	locus_tag=MMCAP1_0411 protein=putative membrane protein protein_id=ACU79325.1 location=504242..505756 gbkey=CDS	95.1	113.9	106.4	94.8	101.1	90.5	3	3	63.8592	95.6469	81.5471	172.019	180.621	162.031	MMCAP1_0411	MQIPIIKPKKAPPLTIEEINEIKQHSSYEKSYLKTFNKYKKKVEHRIYFKTSFWWDIFIIALAALANTITTDYFILATGDTGLFPGGTATIARFLSIVLNKHITSISTSSSFFIFLFIVNLPFFVFGFIKVGIKFTLTSLLYILLSIGWNQIITRLPIINPNEWSLIINYKLISSLPTEWSSKLWLFVFSIFGGFFLGITYSLTYRVGSSTAGTDFISAYVSKKYNKQIGSINMKINFTLLLIFVVLNTVIMPIYKIDSTAKLSVLNTLTDEQFTEIYNKAKDSGKFILDFNSHHHFYLPSNWSVSDQQIWTRQQIAQIIASNTNFTNYDNLTTIIKLKFVFGPSLFASFICFVIQGVVIDRIYPKNKLFTVLISTTKPREVKNYLFESGYRNNIHFLE…
CP001621.382	locus_tag=MMCAP1_0412 protein=putative membrane protein protein_id=ACU79299.1 location=505872..510026 gbkey=CDS	302.5	394.8	273.9	788.1	775	807.4	3	3	203.127	331.531	209.922	1430.04	1384.59	1445.56	MMCAP1_0412	MKNRLASFKKVLRFIIVLILILALLTGIGFSSYKISNNISYGAKFVGGYQALVGVYDKTKNQEEEIPNGDAFKGAQSLEKKLSPFSDNTIETQQSGLSRVFIKASKKAYANNQDDFKNAIERTGGLFILDKNYQDIFFNENLMKIIGIDKVYDSSSDKRVAKKLTLEEFLGEAKAESLQPANFSNKNSPFVSFNLKNDYLKNLIDPKKNKDNNALTMITSVGHIIENLRTYYKKANSTNNQVVEQYLNTYFNQIIKPIQDYISSKASSDPLGVKILKDLFTIEYSVPTTEGSQKNLNIQRNSLVDSDIVKWWNSNSKGKIDNTKDLKYVLFGTDNLNNKRSDHIFRFTNSANKYIYDANASEKDFIKDDKGNVGKYYNKLKISSDNSTSQDIELDYIDK…
CP001621.383	gene=apt locus_tag=MMCAP1_0413 protein=adenine phosphoribosyltransferase protein_id=ACU79671.1 location=510038..510550 gbkey=CDS	5767.4	4213.8	4899.9	552.2	562.9	648.3	3	3	3872.78	3538.52	3755.38	1001.99	1005.66	1160.71	MMCAP1_0413	MNLKEFVVDVKDFPKQGIVFKDITPLLNNKDAFKYTIDQMADFVKKLDVDVVVAPEARGFLLASAVAYAANKRFVLVRKPNKLPREVYDVEYSLEYGTNHQQIHVGDLKPNDKVVVIDDVLATGGTMQAIIDLVKLSKAEVIGMSFLIDLTFLHDVNLFDQYKVQKLIKY
CP001621.384	locus_tag=MMCAP1_0414 protein=RelA/SpoT family protein protein_id=ACU79809.1 location=510633..512897 gbkey=CDS	210.5	221.5	227.5	47.2	51.3	40.8	3	3	141.35	186.003	174.361	85.6466	91.6506	73.048	MMCAP1_0414	MHNKYNYISFDYREIKDFKDLLNELKKYIKNKSELERIEQAYKYAFKCHFNQTRKNGDPYIYHPLSAAYYLAQWRMGPNTIIAGLLHDILEDTPIQKEELVELFNEEVANLVESVTKVSFFAKENRQQIKSKYLRKLYLSMSKDIRVIIIKIADRLHNIYTIKNLRPEKQKIIAQETLEIYSAIAHRIGMKSAKSLLEDRSFEILNPQEFKKITDLFNSDMQNRQQIINEIIINLEQYLKKEKNIKIISIFGRPKTIYSIYRKMNVIGKNFEEISDLLAIRIIAKSIDDCYKILGFIHQKYIPLAGKFKDYIATPKNNVYQSLHTTLSDANGNIFEVQIRTEEMNQVAETGAAAHWRYKEGEIIDIAKKQKEIDEKIDIFSRILDLDKSEDQQSSIEQS…
CP001621.385	gene=smc locus_tag=MMCAP1_0415 protein=chromosome segregation protein SMC protein_id=ACU79295.1 location=complement(512934..515900) gbkey=CDS	826.5	747	710.8	30.8	30.4	45.5	3	3	554.991	627.289	544.771	55.8881	54.3115	81.4629	MMCAP1_0415	MLFLKQIRASGFKSFADLTVMDFNYDMTGVVGPNGSGKSNITDAIRWTLGEQSTKTLRGSKMDDIVFSGNNEKKAADVAEVTLVFNNTHENFSSIKSDVVEITRKFDKNTRESEFYINSTKCKLKDVQSIALEAGLTRSSIAIISQGTVANFTESKPETKREIFDDAAGVSKYKKRKKETLSKLEKATENLTRLEDIAKEISRRLPNLERQSKKALEYQQKVNELKNIELYILTKDLKVLVNRIEELRVEKIEYETQIKKLTNEINMSQEEVNLIIDKDSEDNQKLGELNSKFNSIVEKIANLKVRKQKAEFKEQENLNTKDQDEYKAALIKKQFDEKQISIKSEKDKLTKAENSLLELKDKYDYYSNKYNEIYREIETIRTTISRISIQIEAIEHNKK…
CP001621.387	locus_tag=MMCAP1_0417 protein=CdsE protein_id=ACU79455.1 location=complement(516598..517053) gbkey=CDS	172.6	126.7	130.4	104.8	95.1	99.5	3	3	115.9	106.396	99.9412	190.165	169.902	178.144	MMCAP1_0417	MYKKYSYKDISDWFLAKESMTHKKLQKLTYYAEAWSWALLKHGILNDTAFQAWIHGPVSPELWEVYKNYGWNDIPKKDLRNDYLFDEKTLDVLDAVWTTYGQKSGYELECLSHSEDPWKKARNGLLEFQPSNNVINSEDMKIYYTSIYNGD
CP001621.388	gene=rnc locus_tag=MMCAP1_0418 protein=ribonuclease III protein_id=ACU79424.1 location=complement(517186..517884) gbkey=CDS	329.5	270.3	283.7	72.7	53.1	74.5	3	3	221.258	226.983	217.433	131.918	94.8664	133.384	MMCAP1_0418	MNIKNFFEKYNIKINNEKLFNEALTHNSYANEHKLKYSYQRLEFLGDAILQMYVSRFLFFNYSKLSEGELTRLRASTVREETLFRVAKDINLGALVKLGHGEYITKGYEKPSILADVFEALTAAIYLDQKEDGLVTWLDQTLFKYIKDSNFINDTKDFKSELQELLQSEKRSDLKYIIEKEDFFANENKILYTVSVNLNGQKFGVGKGFSKQEAEQNAASDCLSKLKKPTNN
CP001621.389	gene=plsX locus_tag=MMCAP1_0419 protein=fatty acid/phospholipid synthesis protein PlsX protein_id=ACU79711.1 location=complement(517874..518878) gbkey=CDS	359	313.7	342.6	428.3	444.5	426.5	3	3	241.067	263.428	262.576	777.171	794.127	763.602	MMCAP1_0419	MYKIAFDVMGSDLGSLTAIKAASEFIKEHDDLYLVLVGDETEINQALQQTPIDKTKYETFPTTQVIDMNGSILDIRRKKDASIIRTLELVRDQKVDGMLTGGNSAAFIGAAHFILGELNNIVRAGFMPTMPNAKNKLTLLLDVGANSENTPEDLVNYAKMANIYYKEVLKKPNASIGLLNIGTEKSKGLELQKQTFKQLEELKNINFIGNVESRDVLTGNVDIIVTDGYSGNICLKACEGAAKVLLTEIKKEITSSFIKKLASLVLKKSFKNVAAKFDYKNHAGAILLGVKGICFKSHGSSDVRSFKATLRMTLDAIKNDIVKKIEKGLIENEY
CP001621.39	locus_tag=MMCAP1_0041 protein=conserved hypothetical protein protein_id=ACU79548.1 location=57126..57971 gbkey=CDS	51.4	50.9	50	NaN	NaN	NaN	3	0	34.5148	42.743	38.321	0	0	0	MMCAP1_0041	MTYYLNFYLDESGNAISDFFVVGGFYLNDSDYQNIQIHESKIKSNILKTEKSIREYRNTVETDLKPYDSKKEVKWNSLSLSNKKALSSKIRFNNQTNIAMISSLKNWDSKYGKEIKIEAIYNMMVKNLIERTIKSLSSQKVINNKDILNIKVYIDQRKTMNKTKNKQQKLEALEGYIKTEFYWNLHFKDIQIKVVQFESNSHPLIRYADYFVGSIASMCHFLNHSNKSWYQQADVVFEQIHKKVPCICSQTIINQSSVVKKLINLCNQNNQTRESKTNNAF
CP001621.390	locus_tag=MMCAP1_0420 protein=dihydroxyacetone kinase 2 domain protein protein_id=ACU79806.1 location=complement(518911..520554) gbkey=CDS	1034.9	698.6	799.1	519.5	512.6	497.2	3	3	694.93	586.646	612.446	942.657	915.792	890.183	MMCAP1_0420	MKKLELLKNMITSGVNNLYNHYPQIDKLNVFPVPDGDTGTNMNLTATNGYNEVIDVEYESIGKFLSAFSRGLIMGARGNSGVIFSQIIKGLSLGMNNAKELSVSEWKSGFSKASEIAYKAVMKPVEGTILTVIRETSEKVSQLADDIDIKDFWKQVVKNANQSLENTPNLLPLLKEVGVVDSGGYGLVKFLEGIEYYVLNDQIVNKLDKLEVNNGGNVDMQIEEEFGYCTEAIVMLNDDWINKLQNSVIRDQLQIFGNTSIVVVVDNDILKVHTHSLSPGQVLQFLQQYGDFQTLKIENMNLQANKQVKNKDQKWKENSDIKTERKLINETAIISVVSSEKQKRYFEDELGIAFAINAGAKMNPSTEDFLQAIETVDAKTVFLLPNSSNVYLTAKQAEK…
CP001621.391	locus_tag=MMCAP1_0421 protein=conserved hypothetical protein protein_id=ACU79418.1 location=complement(520579..520890) gbkey=CDS	1354.4	1213.2	1491.7	276.3	246.8	401.5	3	3	909.473	1018.78	1143.27	501.359	440.923	718.843	MMCAP1_0421	MSTIDEFVVQTIREAVITVPGVVGLANFSANNKKDLSTNDIHKAIEFVIDKNIQHFKIHVILLYGVNILDILKEIQIRIKYELEKNFKNNIEHKVDVIVEDLI
CP001621.392	gene=rpmB locus_tag=MMCAP1_0422 protein=ribosomal protein L28 protein_id=ACU79118.1 location=521059..521256 gbkey=CDS	80.6	119.9	92.5	1152.5	1128.6	1250.9	3	3	54.1225	100.685	70.8939	2091.27	2016.31	2239.6	MMCAP1_0422	MARRDALTGKSALSGQSRSHALNATKRKWNLNLQKVRVMDENGSVFNIKVSARTLRTLKKQEKIV
CP001621.393	locus_tag=MMCAP1_0424 protein=conserved hypothetical protein protein_id=ACU79630.1 location=521487..521930 gbkey=CDS	61	57	61.3	265.7	343.2	311.1	3	3	40.9612	47.8654	46.9816	482.125	613.148	556.991	MMCAP1_0424	MNWSIKKVSDKKLAVKKDENGSFLNYSKAVNLAIRMAKKQKAILEIFNEKDRLIKTYNFDQVLTQSELVEKIRTELKLAYAKKTVAKIELEKHHKKYKKALKSKNNLEKEQLKQIFKLAKLNYKNKKRQIKYIKFRYKIAKRNLKDW
CP001621.394	locus_tag=MMCAP1_0425 protein=phosphate ABC transporter, substrate-binding component protein_id=ACU79502.1 location=522019..523149 gbkey=CDS	75.6	100.8	85.3	158.3	159.7	177.1	3	3	50.765	84.6462	65.3756	287.243	285.314	317.078	MMCAP1_0425	MRKIKESDNKTKKQFKHFFTNKKSLLFLNLCVLFIVSIWIWTFVSIKSNLINIGGSASADLVLQKLIKEYQKQTNKKFNYSSTGSGAGARNVINQTYSIGFISKSQNDLSIPKEIRNNLYDDLTEFEKINDELSKKQVFNHLKTFKDKYHYIDFVKDSIVFVYNIKNTGLTNQQIDQIRFNVLNNKISSDSQKALHKIYTNNKQSDLISWKEFYKLLTNKDENNISSLIKVRPYSTNSGSGTRSSFEQISGLKDNNKKIGQAVNEYNSNGAIFTQLDASDGSFGFVSMQYAQDLKKYPNLRSVIIKQNNQEWNLNKRNDNLLTYPLSRPFVALYKFTDNQKLNDDILDFVYWFSYSNDQKVKKIYDHLGLIRKVSN
CP001621.395	locus_tag=MMCAP1_0426 protein=phosphate ABC transport system, permease component protein_id=ACU79480.1 location=523201..525291 gbkey=CDS	33	38.4	34.8	12.9	9.3	11.6	3	3	22.1593	32.2462	26.6714	23.4077	16.615	20.7686	MMCAP1_0426	MLFKKITNNVQFRMIKQKKETSFVCLKSIIITLTIFVLLALVILLGFVMIKTNVLFNKQSFFEFVFGKNWSPDSKQFGILTITLMTLILIFISMLIAVPLTIFTSFFISEYLTLKSQKVTITIIKLLAGIPSVVFGLFAREQIGALFKLMGASSNDNLMVASLTMAFMAIPIMISLSYDAIKSVPFIYRDASLALGISKEKTTFNIIRKSATPKIISAVILGMARVIGETMAIMMIAGNSTAWFDTNNGVSGFLFSSIRTLSSTIGLEMLENSSSLHESALYAIGMFLFILVFIINLLILFVSNKNSISKKIHLVLFKNKKTHKIKHVKLYQKQTLDQIITNRTENKLFKKIYSTIMLVLMWLSISFVIMFTFWIVFTTIFNGLSSLKYSEAFLTIEGE…
CP001621.396	gene=pstB locus_tag=MMCAP1_0427 protein=phosphate ABC transporter, ATP-binding protein protein_id=ACU79298.1 location=525284..526093 gbkey=CDS	524.6	397.1	464.3	366.3	378.7	378.3	3	3	352.266	333.463	355.849	664.669	676.571	677.305	MMCAP1_0427	MNNEQLITNTKPKKEPLKTAIEIKDFNFFYNKGKTQSLFNINMEIKEKSITTFIGPSGCGKTTLLKSINRLNDLIDGVKMSGVIKIFDKDIFDKDIDITKLRTEVGMVFQKPNPFPISIYDNVVYGLRSLGIKDKKILDQICEESLVKAALWDEVKDILTSPALGLSGGQQQRLCIARAIAMKPKILLMDEPTSALDPIATLKVEELVLDLKKDYTIVMVTHSLQQATRISDYTGYFLKGELVEFNKTKKIFTNPKDRRTENYISGIYE
CP001621.397	gene=phoU locus_tag=MMCAP1_0428 protein=phosphate transport system regulatory protein PhoU protein_id=ACU79714.1 location=526102..526776 gbkey=CDS	213.1	248.9	200	418.6	500.2	411.5	3	3	143.096	209.012	153.284	759.569	893.638	736.746	MMCAP1_0428	MSSNKILDRDLDQLRSLIENMIEETKIQYANSYLVIKEENKLIDAQKVIEHDKIINDMQNEFTSIALWKISKQKLVAKDLRLAIGGILITREIERIADYSKGISKFFIYYKPNEKHLLMISELYELVVEMLDIFSDIFENLKVDKEQQVLSLEEKINTKFRSFYDQLIDDIRQKTTKAEAEEIAAVLKQMFNLERAGDHLLNVQEIINFIKTSKFIEKTEKINK
CP001621.398	locus_tag=MMCAP1_0429 protein=peptidase, M41 family protein_id=ACU79504.1 location=526843..528072 gbkey=CDS	677.5	550.2	578.7	309.6	310.2	299.5	3	3	454.938	462.027	443.527	561.784	554.192	536.223	MMCAP1_0429	MGFWAKLKEKLIKKTNQVEQDEPILDQQEQQEEQEQIIEKEIEQEPVVNQDIQVEIIKENKIKKTKTSETKKQEKQTETLKEKKKREKQKEKDKKVEKAMLKSAFNFSKDIKKLSKKYKQADDEFFEELEDVLIQTDMGMKMVLKVSNLVRKKTKRDTSFENIKDALVESLYQAYTDNDWTNKKYRIDFKENRLNIFMLVGVNGTGKTTSLAKMANYYAELGYKVLIAAADTFRAGATQQLEEWIKTRLNNKVDLVKTNKLNADPASVVFDAIKKAKEQNYDLLLIDTAGRLQNKTNLMAELEKMNKIIQQVEKSAPHEVLLVIDATTGQNGVIQAEEFSKVADVSGIILTKMDSTSKGGIGLAIKELLNIPIKMIGVGEKVDDLLAFDIDQYIVHLSS…
CP001621.399	locus_tag=MMCAP1_0430 protein=putative transcriptional regulator protein_id=ACU79067.1 location=528062..528397 gbkey=CDS	52	46.2	63.6	90.3	44.9	48.9	3	3	34.9177	38.7962	48.7443	163.854	80.2166	87.5502	MMCAP1_0430	MKNNLLEKTLELSELFKIYKELLTDKQKQYFELYIDEDLSLSEIADEFNISKTAVYDSISKTSKLLFNLETKLHLKQKQDLLISLINKIETNQIDEKQFIKSLKEVIWWKY
CP001621.4	gene=ksgA locus_tag=MMCAP1_0004 protein=dimethyladenosine transferase protein_id=ACU79638.1 location=3207..4007 gbkey=CDS	42.5	65.8	69.6	48	47	44	3	3	28.5385	55.2552	53.3428	87.0983	83.9684	78.7773	MMCAP1_0004	MKAKKYYGQNFISDLNLINKIVDVLDQNKDQLIIEIGPGKGALTKELVKRFDKVVVIEIDKDMVEILKTKFNHSNLEIIQADVLEIDLKQLISKYDYKNISIISNTPYYITSEILFKTLQISDLLTKAVFMLQKEVALRICSNKNENNYNNLSIACQFYSQRNFEFVVNKKMFYPIPKVDSAIISLTFNDIYKKQVNNDKKFIDFVRLLFNNKRKTILNNLNNIIQNKNKALEYLNTLNISSNLRPEQLDIDQYIKLFNLIYNSNF
CP001621.40	locus_tag=MMCAP1_0040 protein=tRNA(Ile)-lysidine synthase protein_id=ACU79474.1 location=complement(57955..59160) gbkey=CDS	268.6	186.3	233.1	39.1	27.2	27.1	3	3	180.364	156.444	178.653	70.9488	48.5945	48.5196	MMCAP1_0040	MKLFNINKSKKYLIAVSGGPDSVFLLCNVVKLVDPNNLVVCHVNYNFRSDSNNDQMIVTNLCKQFNLKLEILNINKDYSLLKQNFESWARVQRYDFFNMIASKYQIYNLLVAHNFNDLIETYLLQLQRNNLVDYYGLKPVSHYKDLVVYRPLLDIKKSQILNYLNTNKISYAIDSTNSDTKYQRNKIRTTLNENNFTKILDQINKANNNLNSIKKIVDNYLKDNIINNELNLTKELFLFDQNSIQRIIYTYFKLINKESLLLNRSNKTIIEIVKRLVNSNKNHWKINLNDHSLIKDYNKLFVIKNSLLEPKTIIINDLNDLINQTTFKNIKEIEQIILKDKNFSYVITNNYEMYKSITTIANKKTNRYFIDRKISYKTRLLSPVVYNVKDKVILNKIKK…
CP001621.400	locus_tag=MMCAP1_0431 protein=conserved hypothetical protein protein_id=ACU79085.1 location=528385..529158 gbkey=CDS	423.9	316	368.1	110.7	109.3	113.3	3	3	284.647	265.359	282.119	200.87	195.271	202.851	MMCAP1_0431	MKVLMIGDVYAKPGREMLEKHLKNIVDQNQIDFIVVNGENTTHGKSICKKHYDFYKSLNVDVITSGNHIFKNAEVLEYIKTTNDLLKPLNMSKHTPGNGNVIVNKNKKKIAVVSLMGQSFMDAVNNPYDALDEFLKTNTDFDILLVDFHAESTAEKIAFAFNYDGIITAFVGTHTHVMTADERLLPNKTAFISDIGMTGVIDSIIGVEVNDVIKRAKTGLPVKFNIATGKCWLNAVIIEIDDKTNKATSIKRLTIKD
CP001621.401	gene=metK locus_tag=MMCAP1_0432 protein=methionine adenosyltransferase protein_id=ACU79362.1 location=529368..530531 gbkey=CDS	363.9	307.9	362.6	84.6	97.1	104.9	3	3	244.357	258.557	277.904	153.511	173.475	187.812	MMCAP1_0432	MNQNIEKRLFTSESVSEGHPDKICDQISDAILDEVLKQDKNAKVACEVFATTNYLLIGGQISSTAIVDYEQVARDVLKKIGYVDDAYGINANTCKIDIKIESQSPDIAQGVELSNDQIGAGDQGIMFGYATNESKTYLPLAITIAHELVYNATSQRKKGLFKWARPDMKSQVTIDYTNINNPKIDTILMSIQHDPNYNEIEFKKYIKENIMDLVAKEFNLNTDFKVLINPTGRFVIGGPQGDTGLTGRKIIADTYGGYSRHGGGAFSGKDSTKVDRSAAYMCRYVAKNLVAAGLADKIEIQVSYGIGISQPISIFIETFNTHKVDLNTIYKAVYENFDFSVSSMIKNLDLKKPIFFKTSKYGHFGKKDLPWEKLDKIEVLKEYKKCS
CP001621.402	locus_tag=MMCAP1_0433 protein=copper homeostasis protein protein_id=ACU79317.1 location=530522..531205 gbkey=CDS	256.6	182.7	270.9	270.9	395	236.4	3	3	172.306	153.421	207.623	491.561	705.692	423.249	MMCAP1_0433	MFLEVIAKDLSDIRVINNSKADRIEFCKNLEVGGLTPSLDEIILANQITLKPLHIMIRNNSKDFFFDDYELIKQLEMISVIQKLPNVHGIVIGALNNDYTINEDFLQRVNKIKGSLKITFNRAFDLVDDPINALNVLVKHKIDTVLTSGGTNLNTGLEVIRQLVDQNLDIQILIGGGVDKNNIKQCLTVNNQIHLGRAARMNSSWNSDISVDEINLFKDLDREQNNE
CP001621.403	gene=trmFO locus_tag=MMCAP1_0434 protein=tRNA:M(5)U-54 methyltransferase protein_id=ACU79427.1 location=531198..532514 gbkey=CDS	327.2	286.8	302	94.3	95.2	91.5	3	3	219.713	240.839	231.459	171.112	170.081	163.821	MMCAP1_0434	MNKKVKIIGAGLAGCEAAYFLANNNIQVELYEVKTLIKNEVQKTNNFAELVCSNTFRSQSLLNAAGILKAEMRRLNSLVIKIADSCKIDGDDALAVDREDFSKKLTEVIKNHPNITIIEQNVSHIDDENDLTLIATGPLTTNELKEDIQRLIGKQKLFFMDASAPIITKDSIDFNKAYYSGRHKLGKYICCPLNEQEFNEFADNLINAEQVQLKEFEKSIFFKGCQPIEQLAKTSKKLLLKGPMSSNNLLDQNNHQPYAVVQLRQDDAKDSLYNMVGFQTNLKWPEQKRVFQTIPGLQKAKIVRYGVMHKNYYINSPKILNFKLQVMRKKNVFFAGQITGVEGYIESASSGIWAAINILAFINNKKLKPLPNTTILGALTNYITNSKIYSLKPMKCNLG…
CP001621.404	locus_tag=MMCAP1_0435 protein=phosphomannose isomerase type I protein_id=ACU79319.1 location=532540..533469 gbkey=CDS	626	467.7	466.7	65.7	57.2	70.2	3	3	420.356	392.749	357.688	119.216	102.191	125.686	MMCAP1_0435	MKILKLKPYFSKKIWGGNRLKEFGFDIKDNQNIGEAWVISAHENGMSYVISDDQYNNLSLKELFENHKDLFNNYKGCYPLLVKIITASDYLSVQVHPDDNYALSHHNQLGKPESWYVIDANKDAELIYGHTAKNKKELIDLVNQNKWDQLLKKVKVKPNDFLYVAPGKVHAISPNLVIYELQRSSDITYRFYDYNRIDKTTNKPRPLDIFNSIESTITPDINDHIIHNANNKVFSSDYFSLYVLECDDLKEFEVDEKCDWLQLTIISGSGYINDMYFTKGESAITINGIDKLIVKGKIKIIISWIKNND
CP001621.405	locus_tag=MMCAP1_0436 protein=uracil-DNA glycosylase (UDG) protein_id=ACU79281.1 location=533462..534115 gbkey=CDS	89.1	81.3	77	2.1	2.9	5.9	3	3	59.8302	68.2712	59.0143	3.81055	5.18103	10.5633	MMCAP1_0436	MTNLHPSWNKLFTDLNLFDQINNLINKAYSSDDIVFPKQKDVLNLFKLSDLNNIKVVIIGQDPYHDFNQANGIAFSSNALKTPPSLKNIFNELYSDLNIDHFKNNDLTNWVKQGVFLINTCWTVIAHKPNSHTNLGWQKITKKILEQIILHNQNVIFCLWGNFAIKMYDSLLVKSNFVIKSAHPSPLSYKGFKNTKPFSQINNLLINLDLDPINWSL
CP001621.406	locus_tag=MMCAP1_0437 protein=cmp-binding-factor protein_id=ACU79405.1 location=534188..535168 gbkey=CDS	1705.6	1496.5	1494.3	1253.2	1283	1235.9	3	3	1145.3	1256.68	1145.26	2273.99	2292.16	2212.75	MMCAP1_0437	MKKVKDINIEDHLIDTILRIERVIVSTGSSGNNYLILHLADSTGRIEARKWVVSEKDKQLLKPNTIVLLKDTIVHEYRNILQLKVEDYQVIDEKDLLKYNLNKTDLYITAPLDIKTSYLELISLLNSINNQTYKTITLNLIEKYKKEFLTFPAAMSIHHNVTSGLFWHSYTLVKNVLNLKENYFYANIDWDLLICGAILHDIGKVIEISDVNGSDYSLEGKLLGHISIGNAEINKLADKLNLYKDQNNKINKEITLLQHMILASHGKKEFGSPIEPVLIEAVILSALDDLDAKVYKINDELSKIEIDNWTQKITSIDNKMFYKHKK
CP001621.407	locus_tag=MMCAP1_0438 protein=protein hit protein_id=ACU79549.1 location=complement(535199..535597) gbkey=CDS	75	142	108.4	397.1	426.6	413.5	3	3	50.3621	119.244	83.0799	720.557	762.147	740.327	MMCAP1_0438	MDCLFCKIINQEIPSYKIYENEYVYSFLDVRPVSNGHLLVITKKHFENFSACDDKYLQEVILAKKYLVNLLKEKLNPAGFNYLSNEQAISGQTVLHYHEHIMPKYEKDKGFLLKAEIVDIDELENTFNKIVK
CP001621.408	locus_tag=MMCAP1_0439 protein=putative liporotein protein_id=ACU79632.1 location=complement(535600..537756) gbkey=CDS	855.8	1263.7	939	2531.7	2608.5	2579.2	3	3	574.665	1061.19	719.669	4593.89	4660.25	4617.78	MMCAP1_0439	MKKLLTILGSILLSAGTTTVAVACTTKNDKFDKPSITDELSQKIISGLKLSDDFNFTTGERFSKLDYKSLILDMINETISKNKYTDNLNNLSKKFGLEIKQTKELGDKKAEEVLKNLSTIKLFADYTSKRASEENSDSIDLSYSENYPLNPYNLESKNGQKDRTVYAIYYKNNNNTSSSGSSSNGGGSNGGTTWLRWQTTGEFDTLSSTIPSTPQLPSVSLLTDTSTKNFRIAKLSKPTEQDYITKTASVNDDGKATNNGGNESVEWYKNSNDKFETDGQGIMQYRFMYHFKTKIEAKLFNDLLGHAYIDSNLFVDKNDNKSASNKKIILNNVSKLISDIQSNYSQVDKTISNVKMVWAFSLDKQKVSEVNAEINQYVNPDGSLINKDNKKTLKNVFDK…
CP001621.409	locus_tag=MMCAP1_0440 protein=putative liporotein protein_id=ACU79653.1 location=complement(537756..540692) gbkey=CDS	1080.3	1523.1	1295.3	3072.8	3022.6	3012.3	3	3	725.416	1279.01	992.744	5575.74	5400.06	5393.2	MMCAP1_0440	MKKLLTWLSAITLVASSSVLAISCKTEQVKNENSLFLTNFGDIKIDSKSLLEWNQKWNGISSNNQELINKTNNLLAAGILLAIRDNKLQLPSDTKDGWDPSVNSQIKNLLGDKNSTDTATLYGLANKSLNDLKDNKYKNDAKGWQKHLEEMFPGVRKNLADLENAYKSNFILNDSSNSAFIKLKNLLMFNSTVADSMWQKGIQTTNLDWKTLTNNFANAYPNKNSLEELAKAIKAAFEKAESNWNDAKIVTFTNMVNGLGGINNQSTTSGAGSGTNTGQNDNLTITYSSPKDVKNHITTNNGNSENWIKEVLNRISSDAIKGTIAFSQWNPTYNYDSQKGPKNFINYNNQKPSSWTEIVKEIPLLENGDLKTDPIKGEYGAISNSQKYAINNYFKSEKP…
CP001621.41	locus_tag=MMCAP1_0042 protein=transcriptional regulator, RpiR family protein protein_id=ACU79696.1 location=complement(59163..59990) gbkey=CDS	583.8	590.4	595.9	183.5	167.1	180.2	3	3	392.019	495.785	456.71	332.969	298.535	322.629	MMCAP1_0042	MDVTKLILKLDQLSKEHSSASGITSRIILDNIELITNSTISKVAQITYTSPATITRFCQRHLDISGFSELQTLLRVYLNQQEEQNRLLLQNKDKKISKFEEISKAINATDALIETNQVDKLVKAIYNTKTVALISYDNSVNHAVTELAEKMNLIGIPPVIINQQDLLDYYTKISDSSWVFIVISHFAENITTYQSIVQLKKNGSRIGLISMNKPNKYSSVCDYWIKYAVTDADPLQKIKHSANFSLLYVVQVLFNRILTKDHDRFEKIIKTLKIE
CP001621.410	locus_tag=MMCAP1_0441 protein=probable cysteine desulfurase protein_id=ACU79725.1 location=540895..542133 gbkey=CDS	53.7	54.6	56.5	NaN	NaN	NaN	3	0	36.0593	45.85	43.3027	0	0	0	MMCAP1_0441	MNDQFEKIKKQFPLLKKHPNLIYFDNGATTLKPNSVINAQTNYLKNISTNPHSSDYKIGYQSLEILSNTRELVKNFINANHTSEIIFTSGTTQSINMIAKGLINLINQDDEILITSLEHSSNLVPWIWLKQKTNAVIKNLELTNDFGIDINKLDQLITPKTKIISFAHISNTTGYINDVKKIIQKIRSINQNVIIVVDVAQSIAHFKVDVKDWDVDFIAFSAHKMYGPFGVGVLYGKYQLLDKLEPLNLGGGSSLTISRDFTSYTLKSLPEKLEAGTLNISNIYGFKKAIEFILKIGINNICLYETKLKQYTRQQIKANHLENKITFYNLNNDSPLLLFNVNQINAQDISSFLDVKYNITSRSGAHCVRRLEDVIHIKSALRISFAIYNTTDEIDKLID…
CP001621.411	locus_tag=MMCAP1_0442 protein=nitrogen fixation protein nifu protein_id=ACU79391.1 location=542136..542573 gbkey=CDS	197.1	139.3	143.5	NaN	NaN	NaN	3	0	132.352	116.976	109.981	0	0	0	MMCAP1_0442	MIDINNDSLLREIIIKHFLNPENKTLTNNKNAIIKELKSQTCADQLIIEILIENKIIKSMKFDGSACAIATSSIDLLINNLLNLDIKKAIELIKNYQIFLLTGTLINADQLNELVVMKNIHKQKNRILCASLALNDLLEILNSYE
CP001621.412	locus_tag=MMCAP1_0443 protein=5-formyltetrahydrofolate cyclo-ligase protein_id=ACU79279.1 location=542566..543129 gbkey=CDS	194.9	149.9	172.5	34.3	24.1	27.5	3	3	130.874	125.878	132.207	62.239	43.0561	49.2358	MMCAP1_0443	MNKTLLRKQLLEKRKNFDLDYKNTSNLIITNKVIDFIKQHQFKQICIFLSTKYEIETRNIINWCLNHHILVFVPKITTNNNMNMVLLDNSYLTNFNKFNIQEPTSNILANLKEIDCVFTPVVGFDNKLNRIGMGKGFYDKFFSLNSFSYLKVGLCFDKQKVDQIIIESNDIKLDYIITENQNIYKLN
CP001621.413	locus_tag=MMCAP1_0444 protein=endopeptidase O protein_id=ACU79850.1 location=543150..545045 gbkey=CDS	320	403.8	379.8	135.2	143.6	117.8	3	3	214.878	339.089	291.086	245.327	256.55	210.908	MMCAP1_0444	MKYQIKDNLFKAVNQDWLEKTEIPNDRSSIGEFVELDIKNELIIKKIAKDLLKKQANNLLDDPNLINFAKFYSLTSNFELRNKNHIEPLKKYVNEILEIKNLDQLNQMYTTFVYRNYSLPINFDISNDYIDSSIKTLYLTIASHILPDKSHYQNKEVKNKFYKEFKAMTKKLLSAYFNDVKKINLIIKNTLEFDEIIANYSLSSLEKVRYNELYKPYKYEDVIKNTKYLDLNNIIKTLINKDVDQIIFTDDHFATNLDQIYNNKNLELIKSWLVVMLVVRFSKYLDEKTRTTASKYSLFISGQTKVKNKEKHALNLALDYFSTPIGLYYGQKYLGSKAKKDVENMVSHMINIYKQRLKNNTWLTSQTINKALLKLDKLGVHIGYPSEIEPFYANLITNS…
CP001621.414	gene=pgi locus_tag=MMCAP1_0445 protein=glucose-6-phosphate isomerase protein_id=ACU79754.1 location=545265..546548 gbkey=CDS	6301	4289.3	5527.9	535.7	536.2	485	3	3	4231.09	3601.92	4236.69	972.053	957.955	868.34	MMCAP1_0445	MIKVNLDHTNIDINKAVDLNKVKQIHQIIINKTGKGNDYLGWLNWPNDYNKTEYEQMKQVANKLRSEIEALVVIGIGGSYLGCRAADEMIRGLYHQDKVELIYAGNTMSSTYIYQLVEYLKNKNFGICVISKSGTTTEPGISFRVFEKLLVDKVGLNKAKDLIVAITDKNKGALKQLADKKGYQTFVIPNDIGGRFSVLTPVGIFPLLVSGINTDNIFNGALKAKNELINDDLSNQAYKYAVIRNYLYNQGYKTEALISYELQLQMLTEWWKQLFGESEGKDNKGLLPSSMIFSTDLHSLGQWVQEGPRNVMFETIIKITKPNYDLNVPIDNDNYDGLNYLTNKSFHQINQTALKGVIQAHSITGNMPNIVLEFDKMDDEQFGYLVYFFELALAMSAYL…
CP001621.415	locus_tag=MMCAP1_0446 protein=conserved hypothetical protein protein_id=ACU79764.1 location=546560..547024 gbkey=CDS	79.5	52.6	54.1	NaN	NaN	NaN	3	0	53.3838	44.1706	41.4633	0	0	0	MMCAP1_0446	MNSTITKQNKRLDDLYKAGLILIIIGCSFTLLWAVISFFGLIVGGIAISATSNYYPNYDDHVSRAGITAALTGVNIIIIIASLPALITLLFAIKSLKYQTYKYKIICGIMGIVFGLLFGIIGGIFLLVSSKKDEDDPYIIIKDKMNNKDNITSK
CP001621.416	locus_tag=MMCAP1_0447 protein=dUTPase superfamily protein_id=ACU79777.1 location=547046..547549 gbkey=CDS	244.1	231.2	256.9	188.7	197.8	196.7	3	3	163.912	194.149	196.893	342.405	353.382	352.17	MMCAP1_0447	MIDNKTLKWLSEKQIILDQFIQNKWNFKNDKTLLDKKLTAFLVELGEYANEERSFKYWSNKKPSDLEIQLDEYIDGIHFIISVGNQINYNFLEFNYNFLNKESIIDIYFEIISCLNSFIKENNNTNYSNLLNAFLNICEIKNYTQDQIINAYNIKNEINFQRQNNNY
CP001621.417	locus_tag=MMCAP1_0448 protein=rRNA methylase protein_id=ACU79464.1 location=547566..548333 gbkey=CDS	1852.4	1706.4	1381.7	278.3	287.9	292.6	3	3	1243.88	1432.94	1058.96	504.988	514.351	523.869	MMCAP1_0448	MEVISSVSNPKIKEILKLKDRKHRNKQKLFIVEGFHMIMEAYNDQIIKTLLGTSKALEILKDEIPNIEQVIEISENVAKKISDTVTSQQIFAICSMPENTKIDFENNILLLDQIQDPGNLGTLIRSAASFNFKTVIASPNSVNFHNQKVLRSTQGNLFQVNLVNEYLVTVINQLHDNNYIIIGTSLHDDSKPLSKVKFDSDDKYALIIGNEGKGISPELLDLIDLNINIEMAEDVDSINAAVAGSIIMYQINNAK
CP001621.42	locus_tag=MMCAP1_0043 protein=methyltransferase protein_id=ACU79818.1 location=complement(60042..60764) gbkey=CDS	99	92.6	80.3	26.9	30.1	20.1	3	3	66.478	77.7603	61.5435	48.8113	53.7755	35.9869	MMCAP1_0043	MKVLNDLLGYKNRKLYQDNKMFNFTLDSILVARFCNLNSKKKKICDFGTNNAVIPLILSKYTKAKIIGVEIQNKAVEIAKQNIKLNGLEEQIEIIHADIKEFSKLHNQEFDLVVCNPPFFKMDGNPKLKEISLEVANARHELLITLEDIIKSASRCLKNKGNFTIVHRSERLSEIINLFYKYNIYPKRLRLIQSKKTDNAKMILLDGIYQGNEGMELLPTLITHNDDETYTDELLKYFHD
CP001621.420	locus_tag=MMCAP1_0451 protein=NADP-dependent glyceraldehyde-3-phosphate dehydrogenase protein_id=ACU79057.1 location=549989..551404 gbkey=CDS	7368.2	4735.4	5926.4	719.1	715.9	707.2	3	3	4947.71	3976.53	4542.11	1304.84	1279	1266.17	MMCAP1_0451	MYKFKALLDGKLFDNNRILEIINPVDFSVAGQVVSLTKQDINDAFIAAKSSQKAWESTDLEKRISILDKWKQLIDQNKEELAQIIMSETAKPYKDCLTEVIRSVEYIDQTFYEVRNLKTLIIDGAKYGAKNKIGTFMRVAKGVGVAISPFNYPINLAVSKIFPCLVTGNTIVFKPATQGSLIGAKLGELAYQANLPKGIFNVVTGRGREIGDDIITNKLADFISFTGSVEVGKRLLEISSTKDVVLELGGKDPAIVLDDLDLEKYAKEIISGAFSYSGQRCTAIKRVITTDKIADQLVPLLKEKINKLTIGLPKDNCDITPLIDQKTADFVYGLIDDAKNKGAKIIIGDKQEKNLIYPTLVDHVTSDMRLAWEEPFGPVLPIIRTNSVDQMIELANKSN…
CP001621.421	gene=parE locus_tag=MMCAP1_0452 protein=DNA topoisomerase IV, B subunit protein_id=ACU79867.1 location=551591..553522 gbkey=CDS	475	411.3	407.4	48.5	30.6	51.5	3	3	318.96	345.387	312.24	88.0055	54.6688	92.2052	MMCAP1_0452	MAENKKYDESAIQVLEGLDAVRKRPGMYIGSTDNRGLHHLVWEIVDNAIDEALAGYCTQIDVILEKDNSITVIDNGRGIPTGMHKTGKSTPEVIFSVLHAGGKFDSTAYKSSGGLHGVGSSVTNALSKRFKATIYRDKKIHEIEFKNGGKLEKPLTFIANTYKTGTTINFLPDDSIFSNTKFNFSLISERLKESALLNSGLKITLSDLISNRYVEYQFQDGLVEFIKELVDDKTPVTDIITINNESKNIIAEIALQYTEDDNEIILGFANNVKTSDGGTHLVGFKSGLIRAINDYAKDQKILKDKTKLDSNDLREGLVAIVTVKIPENLIEYEGQTKSKLGTSDAKTVVEQIVYEFMSYWLIENKVLANKVIENALNAQKARIAAKQARQAIKSVKGKK…
CP001621.422	gene=parC locus_tag=MMCAP1_0453 protein=DNA topoisomerase IV, A subunit protein_id=ACU79767.1 location=553524..556220 gbkey=CDS	305	282.8	294.8	25.8	27.5	20	3	3	204.806	237.48	225.941	46.8153	49.1305	35.8078	MMCAP1_0453	MSDKSEIILYPLEELLGNRFSRYAKYIIQERALPDVRDGLKPVQRRILYAMNQLNLTFDKPYKKSARVVGEVIGKYHPHGDSSIYDAMVRMSQWWKVNIPLVDMQGNNGSIDGDSAAAMRYTEARLTKISNLLLEDLEKNTVIFSPNFDDSETEPTVLPSYFPNILVNGATGIAAGYATNMPPHNLSEIIDASISIIKNPNITIDQILKIVKGPDFPTGAIIQNKQGIREAFLTGKGKVIISSKWHQEKNNIVVDEIPYEVVKQDLVKKIGDVIDNNPNLGIKEIRDETDRKGLRIVIELNEKANLETVRKFLFKSTWLSVSYNYNNIIIVDKQPKQLGLIDIIKAYISHYKEVFIKRTEFNLNKANLRLEIVNGLIKALSILDEVIKVIRKSENRIDA…
CP001621.423	locus_tag=MMCAP1_0454 protein=hypothetical protein protein_id=ACU79527.1 location=556328..558511 gbkey=CDS	142.5	73.7	63.7	2.6	3.7	2	3	3	95.688	61.8892	48.821	4.71782	6.61028	3.58078	MMCAP1_0454	MEEQIKIRGYLSKFLYKSDSWALAIFTSENNPNKTRKIKGEISDLKPKILYELIGKQTSHVKYGTSFEVSSFTLASINTEQQIINFLKSDVFPGIGNLTASKIAKLYSKNFIQEILNNKEQFFQIKDISKDKLELIYNKIKQINEQNFLRIEFINHNLNLKILDKLKKFTDDENEIKQILTNNWFEFSFKYELGLMQDIDKIFLYFNNNDINNLTRISYWHLYACNEILFNLGDSYTYKNYLFKKVSDLIKINDLDLLNNGLDYAIKNELLVLKNEKIYTYESFNDELIISEVLVNNHLKTNDIDDDLLTSYINQIQLNTQIKDFKYDKDQVLALKNFIKHKISIITGGPGTGKTTIIKAIVELFKKVYHSSNYAICTPTGRAAAKIRENFTESNATTI…
CP001621.424	gene=gtsA locus_tag=MMCAP1_0456 protein=glycerol ABC transporter, ATP-binding protein protein_id=ACU79162.1 location=560448..561668 gbkey=CDS	79.8	109.5	94.6	265.5	250.1	268.2	3	3	53.5853	91.952	72.5033	481.762	446.819	480.183	MMCAP1_0456	MKKPKPNNDNVLIEINDLRFKYHKKQSNYDLLIDHLQIQKNQIISLLGPSGSGKTTLLNLLLGYIKPDKGSIHILNNPKIHEVAYIMQENSVYENTTVFNNVFLSAKNYSKWVEQTYLNYFEKFLNNKELFSKKLIDQFEVYKNLINDLNSKTKTKKQAFLKLVFLCLFEKQVEHKFKFLKEIKLKNLFKNEIELISKKLGIDQLLYKNVNQLSGGQKQRVAFAKGIIKKTNLVLLDEPFSALDAKIKESTIDWLIKIKKEFNLSMIIVTHDQQDALKISDQIILLDKGKIQQFSSGEQMYNDPNNLFVAKFIGSPEINFIKTQDDKSYYIRHNKIKVKANVNGKYQIIDKKSFGDKVHYLINFDKDIKWTLVLNDNSLQVNDLIDLKYNQADVLVFNK…
CP001621.427	gene=gtsD locus_tag=MMCAP1_0459 protein=glycerol ABC transporter, glycerol binding protein protein_id=ACU79515.1 location=563601..565469 gbkey=CDS	2360	2775.8	2410.6	5198.7	5128.1	5051.8	3	3	1584.73	2330.96	1847.53	9433.29	9161.67	9044.7	MMCAP1_0459	MRRKLLGLSAMALTMTAPFAAIACTTTKSDRILFATAQGAGWPLSLALRPLVKYYNETYKNEAGFVPVKFKFADNPTKDPEIETHGITNQFQLIKKTKEDIETHNTKALPNIVLGDQSGAYIINQDQRLLDISDQGIDKNTFSSKIAELHSILAGQHDTTKLYNIPFDNADTNALQINLRVMEKMFELIEKGGGTVEKGSEIYKKVESSKKEKNKNELPEKTIWSALKVKKEKNGTEGSFKDLKINDDTFKSLKALRDFAAKFTEGVEIDESKVKEDTISGEVLSIDYQEQEFYKELHSRINSDKPIFELDKSNDKNIPKVKYNLVQDDSTKQEFKKLWEEWNKSIKRVEYKKETPNKKVFQSMKFMANGIKEWGSWNIFRFQSAISLAASVGANQNKI…
CP001621.43	locus_tag=MMCAP1_0044 protein=DNA polymerase III delta subunit protein_id=ACU79049.1 location=complement(60764..61504) gbkey=CDS	127	105.9	111.2	106.5	116.9	101.2	3	3	85.2799	88.9289	85.2259	193.249	208.849	181.188	MMCAP1_0044	MKKEQVISRLKKLIDNNSLFSNIILNCKDEQTSWDVIYQIIYYAFNKNVKDLDFNKLKDQIQNNTHVDILTIGNNINITNQEVLDLINKMSLSATATQNIKFFIIKNAQNLKQSAANSLLKFLEEPPINTYGILLTNNYSEIINTIWSRCQLINIDNETKIDNKLNRFEELLISKNKDEILLFNKEMKAMNKNELVKMIDDAYNRTIIYQFTNLISCTLELLDDLKFLPLTNIAIDNYLIRIVEQI
CP001621.431	locus_tag=MMCAP1_0463 protein=NADH dependent flavin oxidoreductase protein_id=ACU79430.1 location=complement(571151..572329) gbkey=CDS	1339.6	791.4	927.7	144.4	148.4	148.7	3	3	899.535	664.574	711.008	262.021	265.126	266.231	MMCAP1_0463	MNKYQKLFEPFEINGFKLENRFVLSPMTLSLATLDGKITTQEADYVKRRAHSAPLQITGGVYFDEFGQLFEYGISAKSDDDIPSLTSLYQAMKTDSNCVILQLAHAGKFSKTSLKKYGYLYGPSYEKNHTPIEHEVLELSKDRIKQIIKDYKDATLRVIKAGFNGVEISMAQRLLMQTFFSQIINKRTDEYSATTFENRSRFCLEVVKAIREVIDKHAPKNFIFGFRATPEETYGDILGYTIEDFIQLVDKIIEIGKISYLAIASWGHDIYLNKVRSNTKYKNQLVNKVIYDVYKNKLPIISSGGINTPDKCLEALKYSDLVGLSSVFVADPEFVLKIKNDQIDQINLSVKHDQLKDLKIPESSFQDVVNMFSFCETIPSETIKTFENNSKE
CP001621.432	locus_tag=MMCAP1_0464 protein=lipoate--protein ligase protein_id=ACU79292.1 location=complement(572329..573366) gbkey=CDS	1890.9	1324.2	1370.7	938.8	949.6	981.8	3	3	1269.73	1111.99	1050.53	1703.5	1696.52	1757.81	MMCAP1_0464	MVLIEPIRNGKYIKDGAYWLAIQIWAASNLKIDDTIVFPSIADPHIQMGYFQNPEVEVNFKYLKEKNLEIVRRATGGGTIYIDSNSVNICYLIPYKKGTEILGNYAKFYEPTIKILKELGAKNITQSGKNDLTIDGKKVSGAAMMLLDDVIYGGNSLLYNVDYDAMSQVLNPNRKKIEAKGVKSVSQRVAALSQYLDEPYRNLDIFEFKDLMIKKIFNVDDLKDVNRYIMTDKDWEQVDELIKTRYKNWEWTYGLSPRYEYNRDARLAIGTINFSLAIENQRIEKIKISGDFFAKKDLLELEKALIGTKMTHEDLLKAFNDADLQSYFFNEIKPEEVVKIILDEE
CP001621.433	locus_tag=MMCAP1_0465 protein=conserved hypothetical protein protein_id=ACU79596.1 location=complement(573344..574201) gbkey=CDS	293.2	215.5	227.6	50.7	40	66.3	3	3	196.882	180.965	174.437	91.9975	71.4625	118.703	MMCAP1_0465	MNTNLSIEQLNDLINQNDSLIIAIGSEIYQTNKQLEFENNFSDFIKEFCFIDFKQASVYPFLDIKNYWAFFSRYIKLNYFDQKLDNSFIDLKNYLDNKNYFIITTNRDNSLELAGFDLNKIFYLDSKLNLLECSKKCSDELYINDDAILNMANNQKNLKVELEQIPVCKKCNSYLKVHQRFWCQVFIKDDEFVQTQNNYQKFINKNKDKKMLFWEIGINFNNQLTVKKPFWQMVEQFNKATYLAMNKKIYRIPLEIRSKTITYTNDLNLAIKNLEEVKNGTNRTN
CP001621.434	locus_tag=MMCAP1_0466 protein=glycine cleavage system H protein protein_id=ACU79130.1 location=complement(574203..574547) gbkey=CDS	14243.5	10806.1	12407	1994.2	1939.4	1905	3	3	9564.44	9074.36	9508.97	3618.57	3464.86	3410.7	MMCAP1_0466	MKKVIKFLVIEKIDDKNEYYLRMTSEMQDDIGTVSYLQFKNTDKKHLKEDDIFLALEASKAILNLKMPLDATVVKWNQKALENPKLISSHDDNENWIMVLSDIDQNKFMSLEDF
CP001621.435	locus_tag=MMCAP1_0467 protein=triacylglycerol lipase protein_id=ACU79256.1 location=574734..575528 gbkey=CDS	6131.4	4378.9	5067	1179.4	1167.7	1169	3	3	4117.2	3677.16	3883.45	2140.08	2086.17	2092.97	MMCAP1_0467	MNLIYDYNYVFKNNNNDNESIIFVHGYNSSPRTFEIFEKYWTRSNYYALQFPGSNLVKAVKDHKVTVEGFAQLLIDFIEQNQIKNVVAIGHSMGGGVISIAYKMRPDLFKKLIFITPMNKPQRALYEQYKIDYFPKTFDEYINNTLSSLYYDPSILTSNQEWMKQAKQEFDPYVYNNDVIVELGEPKDRTFELIEQGLDAIKIPSLLILGEKDGVILRDECLDYFKQHVKGVEMHWMKKTGHMVFQENFEEFIKIVENFLNKTN
CP001621.436	locus_tag=MMCAP1_0468 protein=lipase-esterase protein_id=ACU79188.1 location=575530..576324 gbkey=CDS	99.7	75.5	89.2	121.6	128.6	124.3	3	3	66.948	63.4007	68.3647	220.649	229.752	222.546	MMCAP1_0468	MKKLIYDYDYVFKNNNNSDLNIIYVHGFNSSYKAFEIFEKYWTKTNYYSIQFPGSQLVKPAKDHKVTVEGFAQLLIDFIEQNQIKNVVAVGKSMGGGTLAIAYKMRPDLFKKLIFITPMNKTQLPLYPRYKINYFPKTFDEYVNNTLTSLYYDPSFLTSNKEWMEKAKQNFNPEMYDNDLIIKLGTPKAKTFELIEKGLDSITIPTLLILGEKDGVILRDECLDYFKKHVKNVESHWIKKTGHRVFEENFDEFIKIVENFLKIC
CP001621.437	locus_tag=MMCAP1_0469 protein=lipase-esterase protein_id=ACU79074.1 location=576318..577127 gbkey=CDS	1115.9	645	730.7	90.7	79.3	77.7	3	3	749.321	541.635	560.023	164.579	141.674	139.113	MMCAP1_0469	MLDMKKIIYDYDYIFKDNNNDTENIIFCHGFNASINVFNIFKNYWTKSNYYALQFPGNNNVKPIKDHEISVLQFAKLVVEFVKNNNLKNVTLIGHSMGGGTISLAYQLAPELFKKLVYVCPMNKASEDVNNNFLHDYFPKTFEEFTTDFLGSLYYDPSFLTRDPKWMRLAKWHFSGNDYNTKELTDLGKTLVSKELHEQIYQAIKTIKIPTLLILGEKDGVVNREPCLKYYQDEVKNVITTWIPKTGHMVFEEDWDSFIKILEPFLLNK
CP001621.44	gene=tmk locus_tag=MMCAP1_0045 protein=dTMP kinase protein_id=ACU79685.1 location=complement(61482..62123) gbkey=CDS	1075.3	689.3	770.7	122	120.5	123.3	3	3	722.059	578.836	590.68	221.375	215.281	220.755	MMCAP1_0045	MFITFEGMDGSGKTTALLKVKEELERLNYKVLITREPGGEAIAEQIRQIILDNKNKDMDAWTEALLFIASRNQHLQKVIKPALEKNIIVISDRFIDSTSAYQGSARNIGVDVVSEVQQIVLKNCLPDLTLFFDVSFSEAEKRMQIRGESSKNRLDKEKSDFKQKVYQGYLELVKNNPKRIKVIDANQDIDQVYNQAIKIILEKLKENEKRTSN
CP001621.440	locus_tag=MMCAP1_0472 protein=putative liporotein protein_id=ACU79716.1 location=578543..579943 gbkey=CDS	78.3	79.3	61.1	348	341.7	350.5	3	3	52.5781	66.5917	46.8283	631.462	610.468	627.533	MMCAP1_0472	MKKLLTILGSLTLIASGGALVVACNGTQPNNNEKKPDPVNPSEKDPSKDPKDGNKPGDKDGKTPGDNKEPKTPEKKPVKKPIQNAAMASANDTQLLFDETINEATRSWNKTYNEKIEKAEMDKVDAQIAYENAIDDATRLTGELLDTWHRMTVYENDQKWIKAEKERIDEIIYREDIADAEEREAAREVDKVLYYENAIDSFIDSAGRFLDDEYRIQLERHNHKFDEISRKANEDWEDFIALDALDASANHTKELFDIPTNKANLDWAEKYDKRFKFYRELEAKLAKEFKNTASSTTEEYFNVLDTSKENEAWAKNKAEKERLYKERLYKERLYKEFTTSSSNATEEYFKLLDEIHNREKKEEEWIKSEIEKIEKILKDEDFRDGIAKTIKDLFDAIEE…
CP001621.441	locus_tag=MMCAP1_0473 protein=ABC transporter, ATP binding protein protein_id=ACU79618.1 location=580090..580809 gbkey=CDS	172.7	163.5	168.3	175	168.7	141.7	3	3	115.967	137.298	128.989	317.546	301.393	253.699	MMCAP1_0473	MSLIEVKNISKKYNKKTVLGPINLKINKGESVAIFGANGAGKTTLCEIIANTKSQSSGEVLYDFKKEEIAFKIGINFQTQTYPNFINVKELIDFYKTLYKNIINKTYFDEMINKFKLKELFKQKISSLSGGQRQRVNLFVSLFNKPEIYIGDEITTGLDVKAQLEIIDLLKKEIKDKEMTLILVSHNLDEIKQLCDRMVFLDKGKIIDDAPIEKILNRYGTLLEYYLSKTNDLNKGEMQ
CP001621.443	locus_tag=MMCAP1_0475 protein=L-lactate dehydrogenase protein_id=ACU79257.1 location=complement(581693..582649) gbkey=CDS	77140.2	59275.7	61314.2	13633.6	14155.1	13709.7	3	3	51799.3	49776.4	46992.4	24738.8	25289	24545.7	MMCAP1_0475	MKKTANKVVLIGAGAVGTSFLYAAINQGIAEHYVLIDAFPQPAEGNALDLSDTLAVIPHSFSSIKAGTYEDCKDADVVVITAGRPQKPGETRLEMVAGNAEIMKNIATEVKKSGFDGITVIASNPVDVITHVYQKVTGFDPHKVIGSGTTLDSARLRRLVGQKLNVKPESVQAYVAGEHGDSSVAIWSQANIMGRPILDYVKCGCLTLEDLDQIQKDTVDMAYKIINLKRATFYGIGACLTKIVNAVLRDEKSTLMVGAQLNGEYKNKGLYTGVPAIIGSNGWERIIEWDLTKEEQEKFDKSCETLHKTIDSVKHLFE
CP001621.444	gene=nagA locus_tag=MMCAP1_0476 protein=N-acetylglucosamine-6-phosphate deacetylase protein_id=ACU79510.1 location=complement(582701..583858) gbkey=CDS	281.5	284.7	300.9	141.5	159.9	145.8	3	3	189.026	239.075	230.616	256.758	285.671	261.039	MMCAP1_0476	MILKNAKIVLEDKIINNGYLIIKDKKIVEIGSDYKKKNGIDLNNQWLLPGFIDCHVHGGYGVDFETGNKNRFKHFADNIIKEGVTRYIQTSVTNSVKKNNQIYKEFGEFIKLNNGKAKCLGAHLEGPFISKFKKGAHQENLLLNPDIKLTKKWNKLSNNSLKIVTYASELDDGSYLQFLINNQIIPSIGHSNLKANQFEQVYLLGVRHITHLFNAMSGVDQHNPGLVVASFNHKDVLCEIISDGIHLDKEILKMIYNFKTADNLCIITDAMNAKGLDDGIYKLGDLEVYKKGIEIRLINNNALAGAGATYDHNIRVIKQVCDVKMTDLIKMTSINIAKQLNIFDTVGSIEVNKLADLVVLDDDLYVNKVLVEGKIVFKNSKNKKI
CP001621.446	locus_tag=MMCAP1_0478 protein=conserved hypothetical protein protein_id=ACU79577.1 location=complement(584773..585357) gbkey=CDS	14.2	25.5	NaN	20.7	18.6	19.5	2	3	9.53523	21.4135	0	37.5611	33.2301	34.9127	MMCAP1_0478	MENKINHKTYKSLKYLLTISSVILAICLLLVFVQFTKAKPLFISLTPFISLLVILLILSFTCLLVYIIYRMKILKTSNYKYIKKEIIYLYTSFSLYIFSFILTVIYLIIALLIKNSESIRIMFYVVISIFFICIILSSIFETLSRLKEQILLYKQQYQSQQQLKLNKETDNKKQINKEVTNNNNNQSKNPFIED
CP001621.447	locus_tag=MMCAP1_0480 protein=conserved hypothetical protein protein_id=ACU79354.1 location=587160..589160 gbkey=CDS	916	739.7	776.3	1021.4	1016	1056.3	3	3	615.089	621.159	594.972	1853.38	1815.15	1891.19	MMCAP1_0480	MAKKEVKQYLTDVLINKIDYYVSIKKFDFDTIKEMLAIDLIDYEPYMIQTIDKYIKYIIWLDQKNKNKSEAFLKFLDKYQQDLDDNSSLVENKNSLETNSDNLNDYQQRKKHQTWLDQYFRKQKAKYHVYEESPLDSQTKINNFEEFLQDQTNEEQVEEILDKDLDLVNLITSDNTFYQNSTINLDDLKTNSDESLKDDLDDILLANQKLDELEEIELDPEEFGTATINIDKWEAQNGSKNNQEIKQEVEPTLDEQDLTKDSWIEEKDLTSDLIKKIDITKDSWIENDQQINTSLDQKLISEPIVHTPEELVNNNQVEELSKEHWIEENAHLNEEDFNKEHELSTEHWVEEKQEDKCECDKACDQNLEECFDETCDQKTCCEAENTCQKEQDCECEKQD…
CP001621.449	gene=rpsU locus_tag=MMCAP1_0482 protein=ribosomal protein S21 protein_id=ACU79189.1 location=589985..590149 gbkey=CDS	343.5	324.2	299.1	24.5	NaN	14.8	3	2	230.659	272.245	229.236	44.4564	0	26.4978	MMCAP1_0482	MASVIVHDGETIEKALKRFQKVASSNKAEARKREYHLSKKEKRIYKQKQNRKYK
CP001621.45	locus_tag=MMCAP1_0046 protein=DNA repair protein RecM protein_id=ACU79639.1 location=complement(62126..62716) gbkey=CDS	84.8	67.1	79.9	37.9	36.1	15.9	3	3	56.9428	56.3469	61.237	68.7713	64.4949	28.4672	MMCAP1_0046	MLETTFDEIIESIRTNQGLTKKTSERLLVDLLINKDKLDQFIDQLNKAKQLISTCKICGYLSENDKCLVCSLENRNQNIICIVSTILDAKNIENTNKYKGVYHILNGEINLNKNITLDKLNISSIFKRINDNTEIILALNSTFEGELTANYLYKLLSTKNIKITRLAKGIPMGASLDYMDEFTLQSAFLNRKKYGE
CP001621.451	locus_tag=MMCAP1_0484 protein=holliday junction ATP-dependent DNA helicase RuvB protein_id=ACU79833.1 location=590835..591758 gbkey=CDS	13.1	3.3	8.8	NaN	NaN	NaN	3	0	8.79658	2.77116	6.7445	0	0	0	MMCAP1_0484	MFRPEKWEEYIGQTNILDNLKVFIKSAKKQNKVVDHIFIYGPSGYGKTSLAYLLAKQLKTNIRILNGPNLQKASDIISILTSIKEKDVLFIDEIHAVNKEVLEIIYPVLEENKLNIIIGKDYNSKVVNIDLPKFTIICATTEINKIPLPLLNRFPINFTMQEYNLEDMSKIVELYCNKFQIKLDQDIYLYLASFCRKTPRIAINLIKRIKDHIICDNPKLIDINYIKKVLEKLEIYELGLTITEINYLKMIAKNKRIGLDNIAHLLNTTPLIIANNIEPFLIRESLIIRTIKGREITYKGLKYIQNF
CP001621.452	locus_tag=MMCAP1_0485 protein=dihydrolipoamide dehydrogenase protein_id=ACU79852.1 location=591836..593194 gbkey=CDS	493.3	373.2	368.5	160.7	69	168.9	3	3	331.248	313.393	282.426	291.598	123.273	302.397	MMCAP1_0485	MQKFDVVVLGAGPGGYSLANILSLNNKKVALIEKEDLGGTCINKGCVPTKTLIKSAKVFELVKNSQKFGINADNISFDFKKMQQRRLDNKKFFNNSIKNQIELNHISFFKGVGEVLDKNSIKVNDQIISFDKLVLATGTRAKIINFDGLEQSRKNGYLLDSDQALFLENVPSSLTIIGDGPISLEFAYLYNTLGSKVTILTNTDFLLRFDIDIQKSVRQYFDEKQIKIIENANIKKIDNNKLFYDDSFIESEKILLAVGRVPNNESFTKLDIKKDKNGFVIVDEFMKTNFDNIYAIGDITGLTLLSSVAYKTGDIVARNILKTNPEKFDKNLVTWAIYLNPEIAGIGLTEQQLKEQKIEFESIIINSKALPRAHADGIVNEYSFIKFLVSKQTEEILGC…
CP001621.453	locus_tag=MMCAP1_0486 protein=conserved hypothetical protein protein_id=ACU79856.1 location=complement(593210..594019) gbkey=CDS	273.5	232.3	232.5	10.1	14.9	18.3	3	3	183.654	195.073	178.193	18.3269	26.6198	32.7642	MMCAP1_0486	MSKELTVSEFFLVTVQQHLINNLLEENKKKSSKNKTTKSKIKVYTKTNITSLIDKYPLRFQEMIYDLFDINNWSELKEFLNFRNEEIKNEMTPPSLITSQNNPENLEIVEQLKELVNLMTSINLLSLTYESLDDIEYLFPKLGENELIKNVNTEDVSYLFDNLLNKLIESVKEEYLKYFDEDQQDILLLFDSIKSTNISLVKKTLLDKLFKYFENKKIEFSDSFMSDFLYGNPEKLIAGYRIVRNLIRIDFLISLSEFILLYMAEIIKK
CP001621.454	locus_tag=MMCAP1_0487 protein=conserved hypothetical protein protein_id=ACU79093.1 location=594095..595015 gbkey=CDS	75.4	73.9	80.2	NaN	NaN	1.3	3	1	50.6307	62.0571	61.4669	0	0	2.32751	MMCAP1_0487	MNFNKIIVENEKYYLNKYQYFYINKKEITKILNQINWPAIIVDTEFFNKSHNKEEIQPTLYNDTQKDLVYILQYSFAKNLEEIYNRINRKAIKSLAIKRNYNDKTYDFFKQYNLLKKSFINMCINKKIKTIIFAGQSNDKKIIESWVNENKNLLKNKKSDLFILDKTTNEYKINSLDIYQVLNHLSFVNLDNQNQQFYNPKNIQKGWIGENTITIPSLRKFIDYAKDIFNDNNLNDTEDIYLSCCNALKLFSLDKINIDEFKVLNKSVKLAKTHCFNDVLKILYLIDFIYAFSKFKNTNNKYIKKD
CP001621.455	gene=yqeH locus_tag=MMCAP1_0488 protein=ribosome biogenesis GTPase YqeH protein_id=ACU79198.1 location=595024..596127 gbkey=CDS	68.8	61.4	60.1	5.4	5.6	5.9	3	3	46.1989	51.5603	46.0618	9.79855	10.0047	10.5633	MMCAP1_0488	MKSCLGCGSLLQTINKFEQGYVNDTEHAYCLRCFKIKNYNQLVDSEINDQQFINKISALVNENKNNDLVFYYVLDIFDLFGSRILEIESLIKDFKVILVVNKIDLLPKSIKLEKIRNYINNVFKTSCLKNLEIFLTSANKINLVEPLLNKVIKNNKNQQYFIGASNVGKSSLINKMLEINQLIPSIIVSKYFNTTLDFIEIQLDTNTTIFDSAGVSRKNSIANLMNKRFQSYCYFKKEIQQFTYQLTANNSIFFSGVCWFDYLSSSSKKTNFHIYTNKEINLHRTNTKNVIRYWNNNRKNLIPYISNSEKIQVYEFKFTKEHLNNWYDISISGLGWINFKVETEMIIKINIPSDQKTVLVSLNEPLI
CP001621.456	locus_tag=MMCAP1_0489 protein=DNA polymerase IV protein_id=ACU79636.1 location=complement(596136..597359) gbkey=CDS	29.9	27.7	30.8	1.5	NaN	2.8	3	2	20.0777	23.2609	23.6057	2.72182	0	5.0131	MMCAP1_0489	MFNKTIIHIDMDAFFASCMQLKHPELKNKPIVISNSFDKSIISTASYEARKYNIKAAMPLFKAKKLYPQIISVKPDMIFINNISYQIWEFIKNNYTNKIEVASIDEAYLDVSDLVKNTNVLILAKNIQKDIYDQFNLTCSIGIGFNRFSAKMSTSLHKPNGITLTTTSNFKDNIWPISINKMYGFGQSAAKLLNNTKIKTIKDLALLSDVEVYQLLNKKGLALKSEALGLGSDYINYLSNDYKSISKETTLNTPIYQYDEIETIILNLSKFISYKLHKNQLLCKTIEIKIRYKIDEKLFDKQKHLESRHKQITLKNHTNDFEKIYNSALDCFYSLYDQNKGILLIGVGVSKLIHKNQNWVQLDIENQTKVDKNQIDNALKIENMIFDINKKFKKPVILK…
CP001621.457	locus_tag=MMCAP1_0490 protein=papain family cysteine protease, putative protein_id=ACU79282.1 location=597503..600241 gbkey=CDS	9.3	9.6	9.4	33.4	31.8	33.9	3	3	6.2449	8.06155	7.20435	60.6059	56.8127	60.6943	MMCAP1_0490	MKKTNKKIILLLQSLIIFVVIFFIFLKTNQNINITYVNKMITNTSNNTNLSKENRSYYSLRDDYILFNQYQYNTGLCWDFSATKSLETSLMINNNEMYDLSEASISINQKDLIGGGAWFFDYDQLIKENGISFESDFKLGDLYYVPNKGEYKTWLQKIYNSKNIKSFRDQVKDVSFNRYDLLNIKKHIVNNGSLFVPIKNYATKENQNYKHISIKTNNKTKVHELIYTSKINAHAVSIIGWDDQYLASDNSKGAFIVLNSDGYYSNNDGINFLPYNSKAIINDLNGYEYIGDKLLISKSNNNFNNEFSNYYNTKNYGQKNYSSKAKNTNIFNTTQDVKIEYHINNNLAKLYNINAYIYLNGFDVSDLFKINADQNKITIKSKDKLKSGSYTVKLIYQYS…
CP001621.458	gene=udk locus_tag=MMCAP1_0491 protein=uridine kinase protein_id=ACU79713.1 location=complement(600319..600942) gbkey=CDS	286.8	248.2	242.2	95.2	96.2	103.7	3	3	192.585	208.425	185.627	172.745	171.867	185.664	MMCAP1_0491	MSKKVSIILIAGGSASGKTTIASKIANEILKDKSVEHISMDNYYKDFTNLSLEQRNHINFDHPNSIDIDLLIKDLKQLLKRHDIFVPTYDYKKHIRTNKEKLIKASDVIIVDGIFSLHFEKLRELGDIKIFVKTPDDLRFIRRLVRDIKERNRTIESVIDQYLTDVKPMHDLFIEQTIDYADIVIPFKKGNDVAIDIVASKIKDLLN
CP001621.46	locus_tag=MMCAP1_0047 protein=DNA polymerase III, gamma/tau subunit protein_id=ACU79722.1 location=complement(62718..64724) gbkey=CDS	366.4	312.6	281.5	466.4	484.6	501.7	3	3	246.036	262.504	215.747	846.305	865.768	898.24	MMCAP1_0047	MNTNKQSLYRTYRPKDFNSVAGHNNIKEILEKQIKDNRINHALLFSGQRGTGKTSVARIFAKTINCLNLTNSTACEQCNNCKLANQNQLIDIIEIDAASNNGVDEIREIKNSVSTLPLNSKYKVYIIDEVHMLTKQAFNALLKTLEEPPVYAIFILATTEFNKIPQTILSRCQIFNFTKIDKNSLKNRLQYIANQENYQIEKEVLDEMFYLSEGSLRDAINILEQLMLATDDLITIKTLKSIFLIATKQEQLQVVHQSLNNNTSFIISYFQKANDQGMNWDVFALGLIEILKEIIEYKLTNNTEFLNILEKNEVEQFNSVNANNLFILADNLAEAYFKTKAANISFNYLLLSLLKTINSNNNNLQTVSKTINTKQVEQNQEILKPNDITPEILDEPIID…
CP001621.460	locus_tag=MMCAP1_0493 protein=Xaa-His dipeptidase protein_id=ACU79066.1 location=complement(601479..602828) gbkey=CDS	1086.1	889.3	991.6	352	343.9	329.7	3	3	729.311	746.785	759.982	638.721	614.399	590.292	MMCAP1_0493	MKIDEKELISKYFDQALNETKKVVSIPSFLTEPTADAPYGKACKEVLDYVIDLANNLGFQTYKDKNNKYGFVDYGTGEKLFVILAHLDVVPPGNIEQWVTDPFTPIIQDNKLIGRGTFDDKGPAMMNLFALKYLKDHNYISSKYKIRLIFGLTEETTWDSIKTYVNDHGVADLGYTPDGEFPVVYAEKWITNLDIISDEPTDIQISGGAAYNVICDTVSYKGPKIKEIQDYLIKNNITTKIEDDKLIVQGKAGHGSLPWYGVNAATWLAKSMYENNVHHKITDYLATNVHLDFNLKNVFGDISDETGELTQNVGLIEIKNKNSRIGLNFRIPVFTNPTQIFIPTLTKYLEKINLSLEVKKIDNSLYVHQESDLIKKIMRVYQEVTQDYKAKPIAIGGGT…
CP001621.461	locus_tag=MMCAP1_0494 protein=putative N-acetylmannosamine-6-phosphate 2-epimerase protein_id=ACU79726.1 location=complement(602984..603664) gbkey=CDS	2076.8	1169.1	1435.7	206.4	204.2	184.6	3	3	1394.56	981.745	1100.35	374.523	364.816	330.506	MMCAP1_0494	MNLIDQIKNTLIVSCQAVDDEPLNDSYVLSKMCYALVLGGAKVLRLSQVEHIKKIKEVVNVPIIGLIKKHYDNSEVFITPTIKEVDQLVDLKVDIIALDATLRKRPDQDLTNLIKTIKTKYPNQLLMADCSNINDAINAQNLGFDLISTTLRGYTKDTLNHNNIENDYQFLKDLKKVITKPIIAEGGIWTPQQAKEILNLGIHSVVVGSAITRLHLIVKYWNDNLK
CP001621.462	locus_tag=MMCAP1_0495 protein=ROK family protein protein_id=ACU79322.1 location=complement(603723..604598) gbkey=CDS	7.5	7.5	7.7	24.5	15.7	12.9	3	3	5.03621	6.29808	5.90143	44.4564	28.049	23.0961	MMCAP1_0495	MTNIKKYLSIDIGGTSIKYGIFNENLNPLFINSITTIPIKDELLKQIIDIIISSLPLDGISIATAGVVDKNGVIKFANQNIKDYSNFDLKTYIKNFLITYKNSVPIEIINDANSASYIEYVNNKTIKNSVTLTLGTGVGMGIILNGELFLANNGIAGEIGAIKNFDQYIDTDLSWTTFIKKLNQNKYHYNSNDIWTLYNKNDFYKTEIENYLDKLVNLLCTISYILSPQIIYLGGGFSYCSEQILELINNKFKKEFVFYDINPINIKYTSNKNDSGLLGVLHLLVDKHFKN
CP001621.464	locus_tag=MMCAP1_0498 protein=N-acetylneuraminate lyase protein_id=ACU79207.1 location=complement(606754..607641) gbkey=CDS	198.9	115.6	143.3	24.3	21.6	16.7	3	3	133.56	97.0745	109.828	44.0935	38.5897	29.8996	MMCAP1_0498	MKNLKGVFAALLIPYKSDGSIDEQALEKFIDYNIEVSNVDGLYVNGSTGEAFLLSNSERKRILEIVAKHVNKRVALIAQVGSLNIYESIEQAKLAEQLGYDAISAVTPFYYKFNLDQILNYYKEIKKSTSLPLIAYYIPILSGVNFSLEAFEKLFAINGIIGVKFTATDLYTLERIKAKFPDKLVFYGFDEQQLSASIYNIDGVIGSTFNVNAKKAKKLFELIKNGQNQEALELQKEINDFIEIVLANGLYAILKEIIRQHYDLNEVFCRLPMTQVISQYALKAKEIKDKYLTDI
CP001621.465	gene=rpmA locus_tag=MMCAP1_0499 protein=ribosomal protein L27 protein_id=ACU79552.1 location=complement(607806..608087) gbkey=CDS	2542.4	3197.8	3089.7	360.4	357.9	324.3	3	3	1707.21	2685.33	2368.01	653.963	639.411	580.624	MMCAP1_0499	MRFLLGLQYFASKKGVGSTKNGRDSESKRLGAKKSDGQFTNAGSIIYRQRGTKIHPGLNVGRGGDDTLFALIAGTVKYEKFGKNRTRVSVIPN
CP001621.466	locus_tag=MMCAP1_0500 protein=conserved hypothetical protein protein_id=ACU79347.1 location=complement(608089..608403) gbkey=CDS	122.7	105.3	103.9	4.2	5.3	5.5	3	3	82.3924	88.4251	79.6311	7.6211	9.46878	9.84716	MMCAP1_0500	MVDIIINYKNNKIIQFQMKGHANSDEYGKDLVCAGLTAIVSGALNAIDSYYKNDVDIEVLKNKITIIVKQENNNNLQLMLDMLKIQIQTITIQYPKNARIKEVS
CP001621.467	gene=rplU locus_tag=MMCAP1_0501 protein=ribosomal protein L21 protein_id=ACU79584.1 location=complement(608406..608708) gbkey=CDS	2286.6	3100.3	3232.4	1559	1554.8	1509.9	3	3	1535.44	2603.46	2477.38	2828.88	2777.75	2703.31	MMCAP1_0501	MFAIIKTGGKQVKVEPGQEIFIEKIKGEVNDKVTFDEILMIDGQIGTPTVVGAKVLGTIIKQGKAKKIRVIRYHPKKNVNKIYGHRQPYTKVKIDEISAK
CP001621.469	locus_tag=MMCAP1_0504 protein=conserved hypothetical protein protein_id=ACU79099.1 location=complement(609278..610165) gbkey=CDS	475.3	376.2	437.4	48.1	52.9	57.3	3	3	319.162	315.912	335.232	87.2797	94.5091	102.589	MMCAP1_0504	MIIQKTYKNNKPTVYLITTPIGNLEDISLRAIQTLKQVDVICCEDTRTSKVLLDKYQITNNLLSLHKFNENLRIEQIINLLNQNKNIAIISDAGVPIISDPASYIINQLKELEINCNITAIGAGSAYLHALISSGFLIDNHYFYGFLKNKNKISKQNELNQLINQYGDSIICLYESVHRLKDTITCLNQLLDKNHKIVIAKELTKINEEIIYGNINQINQYINSEKFVLKGEFVIVINKKIIDQIINYTDSQLIDLIDQEIKNGYKLKQACEIINLKTKISKNVLYKLYTFKKNF
CP001621.47	locus_tag=MMCAP1_0048 protein=cytosine deaminase protein_id=ACU79111.1 location=complement(64806..65249) gbkey=CDS	11.6	14.2	15.6	12.2	37.1	46.3	3	3	7.78934	11.9244	11.9562	22.1375	66.2814	82.8952	MMCAP1_0048	MNDFNNILDLMIYQSKKAIKHNDIPVCCCIIDSNNNILSMSINTRYKNKNISQHAEINAINKLINKLNTFNLSEYKLITTLEPCMMCYSAIKQVKINTIYYLVDSYKFGIQNNYSINDQNLNLIQIKNHNKQSEYIKLLNNFFINKR
CP001621.470	locus_tag=MMCAP1_0505 protein=putative liporotein protein_id=ACU79858.1 location=610541..611614 gbkey=CDS	943.1	1007.1	900	4203.6	4225.5	4250.7	3	3	633.287	845.707	689.778	7627.63	7549.12	7610.42	MMCAP1_0505	MKKLLSLLACSFVITTSASFAISCKTTDKQFQEFENLINQSENKTMILYLGASDNKSAKSFEQGLEELTKTNSLEQAIKNINETSTNDATSFIYKFKSNLSWNSTNNHTKVLNDVAVKKDKNSKTKKERWIIDQKTSSNSKQIFKNMTNDVVIKNFKYDSDDEIWTKGLTSKILNEYLVKNWAKVFYGETSSSFNKNDNTVTEKVEKLQDKVKNLKGPIFLVLRDKMFYGIVSGFETFSKQDQKNATKTIDNYPNGSDIRKNTYDQWISYLKQAIEMYDVVKLLQDSDPMITPKTEWKYQGTDKVENKKDDKKNGKDEKEKAKEEKPAPSPSPSPAPQPAPTPAPAPTPAPAPTPAK
CP001621.471	locus_tag=MMCAP1_0511 protein=conserved hypothetical protein protein_id=ACU79173.1 location=complement(612259..612882) gbkey=CDS	106.8	91	97.9	563.2	580.5	594.4	3	3	71.7157	76.4167	75.0325	1021.95	1037.1	1064.21	MMCAP1_0511	MKLNDKLKNFFNNIKSYFTTKEKIIIKNKPKAIETKTENNNNNLDNNSQSYHDISNNKEYIDKRATLDSQNEFILKVISNKAELLEQLVDIKNTFKHCEDCLDIYKKNLDDMKLKILRLKKHIDNNYGFLGDEKEYQNYVFIDDVQTYSQTDESAGLKLVHKLEDHFNKYSNYDIDYFIPCNKHKDLIDKHKILSIKIKDLDKIISN
CP001621.472	locus_tag=MMCAP1_0512 protein=1-acyl-sn-glycerol-3-phosphate acyltransferase protein_id=ACU79491.1 location=complement(612931..613869) gbkey=CDS	403.4	489.1	439.2	881.3	863.9	882.3	3	3	270.881	410.719	336.612	1599.16	1543.41	1579.66	MMCAP1_0512	MNQVNSMQEPISQNNKEQEKKIKDHIHVNPWKMLFMWLPLLHIKFKAAKIVRKNKKQPDRYTEEYRYNWVKKAVSKLLYVLDVNIKVEGIENWIDKGVILAANHQSNIDPAILFAINDFSKQQPLAFIAKEELWTSKKFKNFVRLIDCIPLNRKSPRSALEAFKEAKDLIVDYKRSLVIFPEGTRSHSQQMNSFQAASLKVAQMSHAPIIPVSIINSYQVFAEKRPKKVEVKVVFGKPISPNKHISLKTEDLTRFVEKIVDTNLKEWENKEMKYELRKLTKKDIKQLKEEEKKQNSKKQEKKSIKDLFKIVD
CP001621.473	locus_tag=MMCAP1_0513 protein=holo-acyl-carrier-protein synthase protein_id=ACU79845.1 location=complement(614035..614367) gbkey=CDS	40.2	53.8	46.8	134.1	140	132.9	3	3	26.9941	45.1783	35.8685	243.331	250.119	237.943	MMCAP1_0513	MINNVGIDIVENKRIKLKKEFIIKVLSTNEIQTFNTKTKKQKKEFLAGRWAVKEAIIKTLDQAISMNKIDIEYVNQKPVIQNKELQNILISISHEKKYAIGIALKQSDNK
CP001621.474	locus_tag=MMCAP1_0514 protein=conserved hypothetical protein protein_id=ACU79782.1 location=complement(614387..615463) gbkey=CDS	51.6	61.7	38.8	116.8	109.3	112.8	3	3	34.6491	51.8122	29.7371	211.939	195.271	201.956	MMCAP1_0514	MKKLLFLLSNSVLFCLSGLLIYNLNSQNDSNNIVLKQENKQETDLSKIFNDQTYISIKSKDQNIDSQVLEALKLKYKSIDYSLLTINVEISNDRIDVLITPKNGENKYTNKAKISCYIKKDLSVILKDNNDLGEIPINNLDEIKKHIKNKDLLKTSFNDIDFYITNIREDSVKISATRIGDFFGEAFLKFNAKQKILSSAIYKPVLELKNLEKDFIVSILKDTYSSLKNEKLDITIDQEKRKIIIKTIDSSQFIGTVTLKFNITKSITNKPVEPKTTIIDSNSTNLKTEPKKSEDKNNNNFIKNNNTLLTIPNKDSIKNNKNLNSSNKVTGVIIGSTLGVVVLIGISVGSWFYFKKRK
CP001621.475	locus_tag=MMCAP1_0515 protein=deoxycytidylate deaminase protein_id=ACU79473.1 location=complement(615504..615986) gbkey=CDS	260.9	286.5	333.1	27.9	36.7	43.9	3	3	175.193	240.587	255.295	50.6259	65.5668	78.5982	MMCAP1_0515	MSKRLDYLSWQHYFMLIAKASAMRSKDPNTQVGAIVVNELQQIVATGYNGFPRGVSDDEFPWSKNNEDWLENKYAYVAHAELNAIVSSRSDLSNCDLYVTLFPCNECAKIIIQAGIKRIYYANDPYHDKKEFIASKKMLDAVNIKYIKLPDIEISLKVKD
CP001621.476	locus_tag=MMCAP1_0516 protein=putative membrane protein protein_id=ACU79337.1 location=complement(615989..617290) gbkey=CDS	175.4	177.8	171.5	105	99.8	103.6	3	3	117.78	149.307	131.441	190.527	178.299	185.485	MMCAP1_0516	MTNSSTSDKKTLENFFIKNFKYKLLKSKVNSSVSYLYSSNEKHQVIILNFDNNISFEKEKEYIIKKVEKQIKKPVNVFHIVIDNDNQLTTKSNLIVLHSSIQTLATDLEPYFKNTNLLVFNHTIDNELKDDKQPSEEANNKLFTSFLENVKNNKITFSWAVLLILILIPSMLQIVGYFILETNPNSKNVLILAFGGTNWNLTIVGKQWWRIFTYGIAPIKQNGLIVDILSLLILGTSFFSISKITEIQLANTKKLILATILSYLILGLFSSSVLPTIYTGGLISTMGIFIGVLLIDVSGSTTPMAKFSQAKTVVYILILIGFSFFLGDGWTGLLITGTAVILGSAFWGILKVNIKEWAWIQYVHIFLILAILAISLTFIFLPHLTPALDQHILITLSTY…
CP001621.477	locus_tag=MMCAP1_0517 protein=ribosomal large subunit pseudouridine synthase D protein_id=ACU79426.1 location=complement(617283..618215) gbkey=CDS	484.4	350.4	414.9	77.6	77.3	72.7	3	3	325.272	294.246	317.988	140.809	138.101	130.162	MMCAP1_0517	MNKITLNSLNTTLRLDKLLVELLTSYDYSRSYIQKLIKEECISVNNQIITNNNFVVKPNSQITITIKDPILDPNLVKNDEIDLDIIYQDDDLLVINKQNNITVHPSLSNTNNTIVNALLASDVELSSINGELRPGIVHRIDKQTTGLLIVAKNDKTHKLLSEMFKNHQIYKEYLAIVSGVIKPNKGLIDAPIGRSQIDRKKMSVTAKNSKQAITTFEVVERFLKNTLVKCQIQTGRTHQIRVHFNYINHPVLNDPVYGKKHQEFTDFGQYLHAYKLRFTHPITKKEIELISPLPKEFDDKIKELRGENND
CP001621.479	gene=ileS locus_tag=MMCAP1_0519 protein=isoleucine tRNA ligase protein_id=ACU79208.1 location=complement(618795..621542) gbkey=CDS	520.7	393.4	457.8	180.6	163.3	171.3	3	3	349.647	330.355	350.867	327.707	291.746	306.694	MMCAP1_0519	MSNKYKDTLLIGQTDFDMRANLNQKEPKFEQFWQENQIYNKKLKLNENKKVFVLHDGPPYANGDLHIGHALNKTLKDFIIRFKNATGYYAPFIMGWDTHGLPIESAVTKMGVDRKSMSSVAFRELCYKYALEQVSNQANQFNRLGMFTDYDTKYVTLTHDFEMSELRLFEKMYQKGLIYKDLKPIYWSPSSESALADSEIIYKDITSPSIYVGCDVVNSDEFKNTQLIIWTTTPWTLPSNQLIAVGSKIKYSLIQVENLDKQFILASDLINQVSQNIGWENVKVIKEIDANKLVGLNYAHPLYDTKISKVVLGHHVTSESGSGLVHIASGFGEDDFLIAKQNNIKPFAPIDNQGKFTTEISDLDPQLVGMFYDDNNKIITKKLEENKKLLKLKFLTHSY…
CP001621.48	gene=guaC locus_tag=MMCAP1_0050 protein=GMP reductase protein_id=ACU79181.1 location=complement(65390..66352) gbkey=CDS	2504.9	2057.7	2080.9	318.3	346.1	342	3	3	1682.03	1727.94	1594.84	577.57	618.329	612.314	MMCAP1_0050	MKIFDYDDVQLIPEMCIVNSRKECDTTATLGKHTFKLPVVPANMATIINEELAEKLAKNGYFYIMHRFNVDQLKFIKNMKDKNLITSISLGVKPDEYKLVDQMVEQNLIPDYITIDIAHGHALSVKNMISYIREKMKDQVFIIAGNVATPKAVRDLELWGADATKIGIGPGKVCITKLKTGFGTGGWQLSALKYCAKTASKPIIADGGLRVHGDIAKSIRMGASFCMIGSLFAAHLESPGKEVEIDNCIYKEYYGSASEYNKSEKRYVEGKKELIKIRGSIFDTLKEMTEDLQSSISYAGGKDLQAIKRVDYVLLGDYKD
CP001621.480	locus_tag=MMCAP1_0520 protein=conserved hypothetical protein protein_id=ACU79769.1 location=complement(622235..623224) gbkey=CDS	45.3	36.4	50	86.6	91.8	85.6	3	3	30.4187	30.5667	38.321	157.14	164.006	153.258	MMCAP1_0520	MNEKYPNLAKTMINMWNSRFSKTIHKRDEGFAINFSPIKIFSFLNSINRNSNKKLKIKEYKNPNLNFWIYSLDNTKLAASIWLNEKQSNKWVIGVHGYNSNRLEVLYLVWHYQSLGYNILTFDFRNHGISDSNCITWGYKEKWDLISVINWLIKHYDVELIGLVGTSMGAFTTNYFLLTENELIKKANIKWAISDSSYMSVKNLLQRMIKDYSPKFLSNLSKDVLDDILEIYKNEYEVDLTKLDFVDLITINTTYIPVLYIHNRLDKVTSYLDSFRMYQMKNNIENSFDNQIEIYDHGSHHTKSIIEFENEYITKSLNFVKLHQKNHHN
CP001621.481	locus_tag=MMCAP1_0521 protein=conserved hypothetical protein protein_id=ACU79731.1 location=complement(623237..623653) gbkey=CDS	2070.7	1620.7	1598.6	2341.8	2371.8	2465.9	3	3	1390.46	1360.97	1225.2	4249.31	4237.37	4414.93	MMCAP1_0521	MFFKKKKNFFKQNEQDQDQIELELTDSDIFEQESPVLKDSYTQTSNQFNQNHQTNTSNMNQTDMNKSPINTYVFSPMKFSEVQSIVDTLLDQKVVVVDFKNLDDNKAKRFKDFLSGVLYIKKGEYIRLNENIYKFIIN
CP001621.482	gene=ftsZ locus_tag=MMCAP1_0522 protein=cell division protein FtsZ protein_id=ACU79123.1 location=complement(623665..624822) gbkey=CDS	15252.8	10892.5	12573.1	7630.4	8007.7	7263.1	3	3	10242.2	9146.92	9636.28	13845.7	14306.3	13003.8	MMCAP1_0522	MTNEFKQIARIKVLGVGGAGNNAIRRMFEENVQGVEFYIINTDAQILESSPVPNKIILGEKTTKGLGAGGNPEVGKAAAIESEEELRKVVEGADLIFIAAGMGGGTGTGAAPVIAKIAQESGALVIGIVTKPFIFEGRHRNVNAKEGLEELRKHVDSVIVVSNDKLLEYIGSIPIAESFKEADTILKQGVQTITDLIAVPATINLDFADVKSVMSKKGNALFGIGVASGKDKAVEAAKEAINSKLLEASIEGAKDIIVNITGGRTVSLNDAYDAVGVISQAVNNKELNIVFGMAINDDLTDDDEIIVTVIATGFENKNLQNQEPNIIKTPRVEPVVQQTQPSKPVQQEQEEEQEEVDEFDDEMSLTTTDDTEEDFNDDDFPTFLK
CP001621.483	locus_tag=MMCAP1_0523 protein=conserved hypothetical protein protein_id=ACU79611.1 location=complement(624937..626097) gbkey=CDS	43.3	36	32.9	108.8	111.8	108.2	3	3	29.0757	30.2308	25.2152	197.423	199.738	193.72	MMCAP1_0523	MDKQIFTIIEFNKNIINFQVIKYFNNQEMILYKNSYVSEESEILDKDQIKDSLNVYKFLTNCFTDFEKNSSFSKIKQVGLMLSNSLNITKKVTNYDLKSKDKKTSSTTNLEYIVKKINKLQLYDDTDLKIIDTNLIELQVNNKMIDYQNLKKYYIDNTQNNKLVMTFLELSITNELYFALEKLFWKFYKQILFIKPRIVCLNQLVKDQCQDHKLVVDWNWDEIEVGVFNNNVLLKIFKFSFGINKIIKNLSQSLNISFEMSKDYLFNNLDFSSYNIDNLNILSLWNNSENKLDITNGKQIKQLIKSIISEIYTTINQSILKEQNINNYQIYNFGLISKIVGIDMIFNELKNNHFISNNFIGDIDFEQDSTAFIGASLFFKNPEFPS
CP001621.484	gene=mraW locus_tag=MMCAP1_0524 protein=S-adenosyl-methyltransferase MraW protein_id=ACU79477.1 location=complement(626106..627032) gbkey=CDS	67.3	69.6	63.1	23.5	19.4	33.2	3	3	45.1916	58.4462	48.3611	42.6419	34.6593	59.441	MMCAP1_0524	MDKHIPVLLKESIEYLNIKPDGIYVDCTLGRAGHSSEILKKLNQKGFLYAIDQDQIAIDQAKEKLEQINNNFLLIQGNFSNLSALLAINHVFNVDGILYDLGVSSPQIDIASRGFSYKMDGPLDMRMDLNSTLTAHQVINTYSESQISEILFKYGEESFSKSISKKIVESRPINSTLELVEIIKSVLPQKVLKQKKHPAKKTFQALRIYINNELIALENSLKQALDLLNSKARICVITFHSLEEKIVKNIFNNSTNYYQEQLLSNLPIKANLNSKFKLVIKKPIKPSLLELEQNHRSHSAKLWVIEKN
CP001621.485	locus_tag=MMCAP1_0525 protein=protein MraZ protein_id=ACU79366.1 location=complement(627041..627442) gbkey=CDS	104	61.6	73.8	NaN	NaN	12.7	3	1	69.8355	51.7283	56.5618	0	0	22.738	MMCAP1_0525	MLFGTYEHCMDAKQRLTLPAKLRNKLSNPIYLTKGYDADLEIWSKDDFLLQIKEILNQQNDQKDIRNIERIIWSNTVEIDIDNLGRIKIPYNLIQNLNIEKDVFILGLGNRLEIWSKNKYNQHKNKFIKNINS
CP001621.487	locus_tag=MMCAP1_0527 protein=conserved hypothetical protein protein_id=ACU79126.1 location=complement(627743..628261) gbkey=CDS	120	99.4	113.5	68.6	75.2	61.4	3	3	80.5794	83.4706	86.9887	124.478	134.349	109.93	MMCAP1_0527	MKLIFNQTDFKLKKHYELQGQLTDLDQIKSNNILIRSFDFISYDLDLDYNETLKMITVNGVINYTITGIDSRIGNEIKYSNYIDWNDEYSFTNSSDFNTNIIINEEFNLKDYIIEQINLNIPFNLSLNNDILNKYGLGWSLESEEEFQKSQANKIDPRWEQLDNIKIDDNNK
CP001621.488	gene=pheT locus_tag=MMCAP1_0528 protein=phenylalanyl-tRNA synthetase, beta subunit protein_id=ACU79778.1 location=complement(628261..630645) gbkey=CDS	801.4	709.1	802.8	287.7	279.6	277.5	3	3	538.136	595.463	615.282	522.045	499.523	496.834	MMCAP1_0528	MIITRNWLKKYLNLDNISNDQINMALNSLGFEVDSVYDLNSLNSELILGYVEQSKQIPNTHLKLNQVNIGTKSLQIVCGASNVDVNQFVIIAPINATIANGLTLTSKKIQNYESQGMICALNEIGIDLSVINKEDQLKIYNVFDHNLDLKKYIGSDVKQIIGLDDYLFEIDLTLNRSDCLASFQILKELANYFDLEIKNLDNNFSDFKKNNLDLKIDLVNQVKDQIKTISYSYFELNNKNDKLDSKDEIFLKLNQINSSNHLITNLSLISTLSTAQTHILIDLDKLKSSNLKLEFINHDNKELLCLTNNNKLVNIIGLDTQNEFNVDNNSKNVLNIMLNIEPNLMRKQQKLLNISNTYLQRYIKPINPNLFNLANQTFSNLLNDYQLINKAYEVKILKQ…
CP001621.489	gene=pheS locus_tag=MMCAP1_0529 protein=phenylalanyl-tRNA synthetase, alpha subunit protein_id=ACU79752.1 location=complement(630654..631706) gbkey=CDS	1291.1	1055.5	1227.3	188.8	191	186	3	3	866.967	886.35	940.627	342.586	341.233	333.013	MMCAP1_0529	MIEQLNEILNNFKVKLELVKDLNSWEELKKEFIGKDSSLTTILKSIKTISSDKKQEIGKLANQIRVEIINQLNEKQEQLKNKELLVKLEKEKIDVTLTNSSLKFGSKHVLNIVIEEISDIFTEIGFEMVSGTEIESDLYNFQKLNLPVDHPARDMQDTFYLDNNLVLRTHCTNMTSRMLTKLASLKTEDNNLAVISYGNVYRRDDDDATHSHQFMQIDGFVVGNKISFANLKWILKYMCQRLFNKDINIRLRPSYFPFTEPSVEVDVSCFKCDSKGCFICKKTGWIEILGAGMINEHVLKLNGLDPTKCSGLAFGIGIERIAMLKFNISNIRNFYENNVKFLEQFKFYSE
CP001621.490	locus_tag=MMCAP1_0530 protein=conserved hypothetical protein protein_id=ACU79607.1 location=complement(631736..632344) gbkey=CDS	107.8	89.7	96.8	9.1	15.5	19.5	3	3	72.3872	75.3251	74.1895	16.5124	27.6917	34.9127	MMCAP1_0530	MTDFILIRNSFFKNNVSKIQKTKYLNMTINWSFSDFEDILNKPNFITYLQNSSKLNFSYLMIDAIENKINQIRNLFKKTNTACIDYLLKTNNTNFIEINYKKFLLTSYTLLRDFINQIFINWIFNDALNNHWIEFNKAYDNNLMFNYQFERLELDFQKNLFNIIKAINKKINDPVIRILISAYIEDINNKQTYLNQIHKNLK
CP001621.491	locus_tag=MMCAP1_0531 protein=efflux ABC transporter, permease protein protein_id=ACU79536.1 location=complement(632353..636801) gbkey=CDS	66	94.9	102.1	172.8	170.7	164.5	3	3	44.3187	79.6918	78.2515	313.554	304.966	294.52	MMCAP1_0531	MRHIIKSYLKTFFKKNYVSTFGILLFIITLATVIIGMLATPLQLNNRINYLAKHNTSYNSILDTRSMNYDPKFTYNYFYLNKEINNKDTNYTKLSELYIKAINSELEQNFTNTSTDKKENNLYIYDSNNLEDRVKIDFIGNLINSDLFRYRNGALIKTESYIFNKDYNNDQNNLNSFSNISNQVLNRIISDFHQSMSDGISLDNNAKYDYVVSEFYKAYSRFNSFLTINEINLIDKPILTFKFTEILNKLNDNKIDEITKFLVKQLQDLKNKIKNHQKERIYLPSFLVFSDKFSKVLANEKFLYDDRIYIVDQLLDNVENFVLQTKKTFKIQQSSVGQLLPFLTLQLTSDNQIFKNTNKDFNQIQFDKNHKNSEFAKKWDVNINYQQKVNPTQIVISSS…
CP001621.492	gene=argS locus_tag=MMCAP1_0535 protein=arginine--tRNA ligase protein_id=ACU79619.1 location=complement(641960..643624) gbkey=CDS	484.8	468.3	487.1	112.5	101.4	114.3	3	3	325.541	393.252	373.323	204.137	181.157	204.642	MMCAP1_0535	MSTTIIEMFYNDLKNICQKLNITKEPIIEINKNNTPGLLSSSICLISSKQVNKKPLELAEIFKQELLLTNSYLNIDIAAPGFLNVLVKPEILSNVISNVLSLKSKYGNLEKQNKTINIEYVSANPTGYLHVGHARNAVIGSVLVNLFKKAGYNVQTEYYVNDAGNQINVLAVTVFVHYLQALNIDAKKPENCYAGDMYEDLAKIIINKYNDQFKDIKYTDNKILDDNVHSLFKQISIDYFLKIIKQQLADFNVKIKHWSSEQEVYDTHQIEKVLKLYESKDALYYKDDALFLKTTQFGDDKDRVLVKSDKTYTYILPDLATHNLRIKRTKADKLINVWGGDHHGYIKRMQAGLALLGNDPDILEIQMVQMVRLIKDGSEYKMSKRKGTAVWLVDILELV…
CP001621.493	gene=frr locus_tag=MMCAP1_0536 protein=ribosome recycling factor protein_id=ACU79489.1 location=complement(643626..644174) gbkey=CDS	17707.3	12255.1	14656.7	2817	2917	3147	3	3	11890.4	10291.2	11233.2	5111.58	5211.4	5634.36	MMCAP1_0536	MTDLILKNAELQMRETIDAYVIHLRQIRTGKASGAILDKVMVNYYGSLMPLNQISQITTPEPNLIIIKPYDRNVITEAVGAIHKADLGLNPVSDATLIRIPIAPLTEDVRKNLVKKVHKELEGYKIRIRNIRRDAIDEIKKIENISKDLISDNEDQIQQITDKFIKQLDDLTKEKEKELMTI
CP001621.494	gene=pyrH locus_tag=MMCAP1_0537 protein=UMP kinase protein_id=ACU79849.1 location=complement(644185..644898) gbkey=CDS	56.8	34.9	35.5	120.9	145.7	133.3	3	3	38.1409	29.3071	27.2079	219.379	260.302	238.659	MMCAP1_0537	MNYKYKTVLLKLSGEALKGDAEVYDKKCLDNIASQIVHLAKNGLKLAIVIGGGNIWRGKLGENIGMDAINADYMGMLATVMNGLALESTITKMGYDKIKVYSSLPIKTVTDDYNFKKARIKMNEGFISIFVGGTGYSYFTTDTNATIRAIEIGADVILMAKNGVKGVYDKDPKQHSDAKFIKRLTHQEVVDKQLRIMDLTAATLAKDANLKIEVFDMSGDNNIIKVLENKLESTIIE
CP001621.495	locus_tag=MMCAP1_0538 protein=conserved hypothetical protein protein_id=ACU79763.1 location=complement(645032..645637) gbkey=CDS	388.7	652.5	585.6	436.7	488.6	491.4	3	3	261.01	547.933	448.816	792.413	872.914	879.799	MMCAP1_0538	MISFNTEYFGVISGLLIAFILVINLMFNFYLFKFVKKQALITKYNKFYFIVFYIISFISLVLAIISLVLFNLKDKIFSQTSSESQKLYPTIVLNAISFVFLISKIILLFIFLPRFAIKITENEILYLGEKIEFQTITKIIEDTNTQALYINYKPTKRTYKRIRYPKACPFNQVIKNSTTNTSLEISNQDANEYFKKIKELS
CP001621.496	gene=tsf locus_tag=MMCAP1_0539 protein=translation elongation factor Ts protein_id=ACU79261.1 location=complement(645637..646524) gbkey=CDS	7532.4	6208.6	6393.4	1986.6	1988.2	1989.3	3	3	5057.97	5213.64	4900.03	3604.78	3552.04	3561.63	MMCAP1_0539	MAVDAKLIKELREITQAGMMDCKKALEASDNNIDNAIVWLRENGLAKAAKKTDRVAAEGIVLAKENDQKIVILEVNSETDFVAKNEKFLSLVDEIANALLNSNASSLEEGLQVKTNSGLTIEQSLISATATIGEKIALRRFELVNKTEGSSVIYNHANKRVSTLLVFDNKLDSTDAYNIAMHVAAMAPKYINMDQIPEDFKNAEMHIIKEQAKDDAKLQAKPANVLENILKGKLSKRLAEVSLLDQLFVIDESFKVGDFLKSKHVSLVKMIRYEVGEGIEKVVTNFADEVAAQLK
CP001621.497	gene=rpsB locus_tag=MMCAP1_0540 protein=ribosomal protein S2 protein_id=ACU79175.1 location=complement(646536..647414) gbkey=CDS	13331.4	11664.7	10956.3	2062.4	2075	2180.6	3	3	8951.97	9795.37	8397.13	3742.32	3707.12	3904.13	MMCAP1_0540	MSREITREELSAAGVQYGHQTKRWNPKMKSYIYGVKNKNHIIDLEKTITHLNTAQKLLETLGSKQQKILFVGTKRSGKNAVKEAALRSGNFYINNRWLGGTLTNLKTILIRIKALWEIEEEEKKGRLSLRTKKEQIKILKEKAKLEKALGGIKQMHKLPAAIVVVDPKGDEIAVKEAKKLNIPVIAICDTNADPDMIDYVIPGNDDLQESVNLIINILVEAYAEGAQIKMNPSVLKTVAPKREPRQNRVMTPVVENQSTEQQASENVSNTQVSNEPVTPVVEVEKSSEPKAE
CP001621.498	gene=dnaJ locus_tag=MMCAP1_0541 protein=chaperone protein DnaJ protein_id=ACU79665.1 location=complement(647622..648740) gbkey=CDS	282.2	205.1	227.1	173.1	179.6	187.9	3	3	189.496	172.232	174.054	314.098	320.867	336.415	MMCAP1_0541	MKKKDYYEVLGVSKTASEQEIRQAYRKLAKQYHPDLNKSPDAHDKMVEINEAADVLLDKDKRKQYDQFGHNAFDGSSGFSSNFADFEDLFSNMGSSGFSSFTNIFSDFFGSNKSDYQRSTKGQSVSVDIYLTFKELLFGADKIIELDLLTNCSVCFGSGAESNSDISICNNCHGTGEVLIQKNMGFFQFQQSAKCNVCNGAGKIIKNKCKNCKGKGKYLERQKIEVNIPKGIRPNQQIKLSQKGHASINNGVNGDLIIDIYLKESKVFEIVNNNDILMTYNISYLDSILGNEIIIKTLDGDIKYKLPKSINSNEFIIINNKGLYKSINKDKRGDLIIKVNIVVPKNLNKKEKELIEQIYEQTSFNPENNIDQ
CP001621.499	gene=dnaK locus_tag=MMCAP1_0542 protein=chaperone protein DnaK protein_id=ACU79544.1 location=complement(648804..650579) gbkey=CDS	9368.4	7414.3	8343.3	4252.3	4027.5	4090.7	3	3	6290.83	6226.12	6394.47	7716	7195.38	7323.96	MMCAP1_0542	MAKEKIIGIDLGTTNSVVSVIEGGQPIILENPEGQRTTPSVVAFKNSDIIVGGAAKRQAVTNPNVVQSIKSKMGTTSKVNLEGKDYSPEQISAEILRYMKNYAEAKLGQKVTKAVITVPAYFNDAQRKATKDAGTIAGLQVERIINEPTAAALAYGLDKQDKEETILVYDLGGGTFDVSILAIGGGSFDVIATSGNNKLGGDNFDEEIIKWLLGKIKAEYNIDLSKEKMALQRLKDEAEKAKINLSSQLEVEINLPFIAMNESGPISFATTLTRSEFNKITKHLVDLTIQPVKDALSAAKKTPSEINEVLLVGGSTRIPAVQELVKSLLNKEPNRSINPDEVVAMGAAVQGGVLAGEVTDILLLDVTPLSLGIETMGGVMTKLIERNTTIPAKRTQIFS…
CP001621.5	locus_tag=MMCAP1_0005 protein=hypothetical purine NTPase protein_id=ACU79583.1 location=4064..5155 gbkey=CDS	289.4	339.8	272.7	2559.5	2707.2	2619.5	3	3	194.331	285.345	209.003	4644.33	4836.58	4689.93	MMCAP1_0005	MIRDFNNQEVTLDDLEQNNNKTDKNKPKVQFLMRFSLVFSNISTHIFLFVLIVIASLFFGLRYTYYNYKVDLITNAHKIKPSIPKLKEVYKEALQVVEEVKRETDKNSSDSLINKIDEIKTIVKEVTEFANEFNDRSKKVEPKVREVIDQGKKITTDLEKVTKEIEELRKTGDSLTNRVRRGLNNFSTLGNLVGTANNDFKSVNESVIRITDLAKKISEEGKKITANVETIKKEVDYFSKRSEIPLRDIEKLKEIYRQKFPLFERNNKRLQEIWSKLMGIFNQFTVEKTQSNYYNHLIYILLFLIIDSIVLLVLTYMSMISKTMKKILLFYIFGILSFNPFVWVSVVISFLSRPIKNRKRKFS
CP001621.50	locus_tag=MMCAP1_0052 protein=hypothetical protein protein_id=ACU79420.1 location=complement(67188..67508) gbkey=CDS	94.9	124.5	140.2	167.3	187.1	246.1	3	3	63.7249	104.548	107.452	303.574	334.266	440.616	MMCAP1_0052	MKIAGFWRRVFRSLIDSLALVFTLGIYLIIFIILYIKGSPSWGMRATGTKYSSNKMFKLALWRLLFWLLRFLTLGILLFIDLFRIILKKGTFAEKKADNFIIINQK
CP001621.500	gene=grpE locus_tag=MMCAP1_0543 protein=co-chaperone GrpE protein_id=ACU79678.1 location=complement(650638..651240) gbkey=CDS	2304	1900	1901.1	363.2	392.2	405.8	3	3	1547.12	1595.51	1457.04	659.044	700.69	726.541	MMCAP1_0543	MTEELKNKKNNKKYYSQNRNKTKAEFQKTHIKKNQYLNLKTKLNTVLLEVQNLKDLNETLKLKLESEKQLNLAEISNLTKKYNQKESETKKYGASNLAKDLIQPLEILKKVVNAPNNNEVVQAYVKGFEMIINQINNVLESHHIKAMNVKVGDMFNPHLHDANEAVESDMYQTNQIVGVLSDGYMIHDKVLVYAIVKVAK
CP001621.501	gene=hrcA locus_tag=MMCAP1_0544 protein=heat-inducible transcription repressor HrcA protein_id=ACU79490.1 location=complement(651242..652264) gbkey=CDS	114.5	82.4	75.5	21.1	17.7	18.4	3	3	76.8862	69.1949	57.8647	38.2869	31.6221	32.9432	MMCAP1_0544	MLTNRQIKILQTIVEEFIKTNQPVGSKRILELLNMKISSATIRNESATLEHEGYLEKQHTSSGRTPSTKGYRYYVDNIMKLDSADYTRLKIYLNQLLDLRKYDIDKTINYASEIISELTKMTAVVIKKQNIKDIKLKKIELILLSEFLASVLFIFSDGDVQNKMFNLKDVALSDLKIAIKLFSDVLVDVKLDEIDQYLNDLKHQLSLSIKQYDYVLNTFINTILESKNEQKETHGMRYMLENPEFNDTNKLKNAVKLVEQLSPFDWFNIAYESNKNMNKIAIKIGNEIDQINDDISMIATELKIGNSSTVLTLVGPKRVDYNQVNQLMNLIIEIINTKEN
CP001621.502	locus_tag=MMCAP1_0545 protein=ATPase family associated with various cellular activities (AAA) protein protein_id=ACU79846.1 location=complement(652269..654410) gbkey=CDS	1209.5	875.1	1007.2	179.3	175.9	177.3	3	3	812.173	734.86	771.938	325.348	314.256	317.437	MMCAP1_0545	MEFQEKGKVTDALKKYTRDLTKDAKDNKLDPVIGREEEISRVIQILSRKTKNNPVLIGEPGVGKTAIVEGLAQRIVKGDVPTLLKNKRILELDMGSLMAGAMYMGDYESRVKAVVNEIQKSNGEIILFIDELHLIVGAGKTGNNSGMDVSNLLKPALARGELKAIGSTTLNEYRQYIEKDAALERRFQRVLVSEPTIDQTISILRGLKDRFETYHGVRIHDNALVSAAKLSSRYITDRYLPDKAIDLVDEACASIRTELASVPIELDQVNRKVMQLEIETSALEKEKDDKSKERWQEAKKELDSLKIEQASLNEKWEKEKEELSRINSVKSSIESLKQELETAQNDGNYKRAGEIQYSLLPSLEKSLALFEKQTGSKMISEEVTEHEIAKVVSKSTGIL…
CP001621.503	locus_tag=MMCAP1_0548 protein=rRNA methylase protein_id=ACU79127.1 location=complement(655438..655983) gbkey=CDS	473.7	405	400.6	142.1	152.9	122.9	3	3	318.087	340.097	307.028	257.847	273.165	220.039	MMCAP1_0548	MNKRKINIVLYQPEIAQNVGAIMRTCVAINARLHIIEPLGFIFDDRHLSRPSANEYKYVDCIRYDDWNDFITKHPNITLFCLSRYGQKPISDFDFSKINDNVYLVFGKESTGIAKPILKEHYNTTFRIPMISETRSLNIANTVGIASYEVLRQWDYLDLVKYETQKGKDYILSERWKGIEE
CP001621.504	locus_tag=MMCAP1_0549 protein=Ham1 family protein_id=ACU79677.1 location=complement(655996..656598) gbkey=CDS	38.3	33	40.3	139.6	123.3	117.5	3	3	25.7183	27.7116	30.8867	253.311	220.283	210.371	MMCAP1_0549	MDKKIIYLATTNKNKVKEFSEILKDYQIKSLLDIPEYVEIEENKKTFKQNALLKAKHLAKYINGVAIGDDTGICVKALNDFPGIYSKRWAYPLTNHYDICNKLLDKLKHINQLHKRKAYMTTAIALYDAINKKQFVYQARVNGYIDFQINKSDFGFGYDFIFIPKGYHKAYSLMNSELKNQISARKKAIDRLIQYIDNVK
CP001621.505	locus_tag=MMCAP1_0551 protein=putative liporotein protein_id=ACU79588.1 location=659495..661999 gbkey=CDS	332.7	409.9	355.2	391.7	436.9	418.7	3	3	223.406	344.211	272.232	710.758	780.549	749.637	MMCAP1_0551	MKKLIAILSSMMMITTASLPIIACHTKQNKFENNNSITNTHSTASLFAKELILADQLQVNLQEIKNRNDQKNLDLLLDEYNLKLDNTDPSIKNISSSNELINQYFEKDSYKNVLDSNIKLDSQKKLSNPLFSEIFKLFGLGTTDLDKFSDDITNILTLLVNLNPMFISSNFDKSNTTLQSFFKNIKPSLKTLFDSITTQKEGITKNVKEFQEKLNVNEKYKNLKVEDLDIAFYTSLINAIGLGIGTKDFTAIEIKIENTNETLQKAGEMLAKITDSPAQPTQNKEWDIVLYTLQALQFLQLKLSLFENVKSHTPISANNLFDDKKTNQEFLTELYKDKTIANITEKRPSSINLKYLLSFIKNAVDELKDEKQLDGYELQKLLAMLFLSTAEVKYGESFN…
CP001621.51	locus_tag=MMCAP1_0054 protein=AhpC/TSA family protein protein_id=ACU79855.1 location=complement(69861..70310) gbkey=CDS	12271.6	7004.7	9272	1401.7	1361	1336.9	3	3	8240.32	5882.16	7106.25	2543.45	2431.51	2393.58	MMCAP1_0054	MKNYQLQDHKNNLVELNSLVGQKGLIIFFYPKAKTSLCTLEVIEYQKHLDEFKQLGFNVVGVSQDEPNKNDEFCCEQNLSFLLLSDLNKDLVNEFNLTSETIVLDDEPFVKYERSTFVLDNQLNLLKEFRNVDHIEHVSDLLEYLKKND
CP001621.513	locus_tag=MMCAP1_0559 protein=conserved hypothetical integrative conjugal element protein protein_id=ACU79862.1 location=670233..671423 gbkey=CDS	31.3	18	21.3	7.2	4.9	3.4	3	3	21.0178	15.1154	16.3247	13.0647	8.75415	6.08733	MMCAP1_0559	MLSDNPILNIDFIEDGVIKQDNELETSEQKEATLKTEVKEISQPTKVSSNEKWTAKEVEEQKAKETDYFKQLVEKADKEIEEIFHKPEELKNFFAFATTLQNNYSSRNLMLIHQQFPGATIVKSFTEWKREDLSVKKGEKGIKIIRPLVDEYVFINNNGENQKVFKKNWTRDIWQKIKNNEIEVHEDLLGFKPANVFDIAQTNLPKEEYPEDYFKDFIDEDTAQLKFNELVLSELKLFVKEKNIELKPKASLGQARGLTTINDLGQKVIYLNEHNSTKQNIDTLLHEYAHIKFNHSYKTTERAECEYQAEMTAWALAKTLKVDTTENSYKYIGRWLQTSNVVDKRKWMDETISTLKVIRQELNQHILKSIETRMERKKELEEKEEKKHKQVLSLKQ
CP001621.514	locus_tag=MMCAP1_0560 protein=putative liporotein protein_id=ACU79444.1 location=671661..673193 gbkey=CDS	5.6	5.5	3.9	6.5	6.1	9.8	3	3	3.76037	4.61859	2.98904	11.7946	10.898	17.5458	MMCAP1_0560	MRKLLFILLPTILLPTLTVTSCSSWFKLPRKTPTSYTKNPDYKDNLNKDDKKEIIKNFSYNGITYNLNQEDNINPENVYFANEVLENDAKQFKSYIPDYKKYFYNQVSNALKLDTPDLGAPWFDFPTIAKLSQFVRSLEHFNVVNSYNSSFMLKDKTTKQQLTSEEYNNLVNKILEILKNQNNLIKTINDEEVDFSSINNSKNEKVSDQLPSTLEHRKQEMGFNDTSSNKDYWGTYTETKLESGAIKKEYSETPLKDSKATAFLDGSLKQIPVYLWKLKKIFDFNGNFKNEYFLQREFFEKSSEFNREKQDLNNEISDYFYRNKIKIYAMQKDLWNMLIAYLEFQKAMTTLGNVSDENLSLEKNFKNSKILEAISNFENKLLEYMKLSQLFGWLIDPSK…
CP001621.52	gene=mmyCVR locus_tag=MMCAP1_0055 protein=GATC--recognizing Type II restriction modification system (MmyCV) endonuclease subunit protein_id=ACU79165.1 location=complement(70549..71838) gbkey=CDS	64.1	48.4	56.3	15.7	20.1	39.5	3	3	43.0428	40.6436	43.1495	28.4884	35.9099	70.7205	MMCAP1_0055	MNINEAWGKLFDKYKILDEINKKGFYIIKTETIKEFNEPRLMAKFDSSLKLPEIFKQYNINILPISKKKYILSNFKLYEYIGQLGENNKHNIERITIEHNYQSININNISSESSAIMSLILTKTLDNFLVEDDNTMTFFGRMWTKNFDFFVDKIDNKSMKIEVNNSQCEIDAGLENRKSLVILEAKLSSDPDFNIRQLYYPFRLWSNKVEKPIRLVFISYFNQIFRLFEYKFEDINNLSSIKLIKQKNYSLYDTKITLDDIYKVFLETKVIYTDNQYESDTIFIQADSFWRIIDILEFLSRKTKTKTKKQIAQIMNFTDRQADYYFNAGKYLKLWDKNKNTKQVFLTNTAKKIMKLNYKQRQLKLVSLILEHKIFNELFIQTYTNQQFPTKEKIIKIML…
CP001621.521	locus_tag=MMCAP1_0568 protein=conserved hypothetical integrative conjugal element protein protein_id=ACU79167.1 location=682033..682698 gbkey=CDS	59.8	41.5	27.9	10.4	21.2	10	3	3	40.1554	34.8494	21.3831	18.8713	37.8751	17.9039	MMCAP1_0568	MKEKPNKTQETKTSELKTNQVPVKKKSNELLIAFRLYNKTDIIRFEEWKKELEINGESVSNAISNVIRNYLLEKDKQIVLKSVREDLYYSLRKVMFSSLAPFSANIIKEVLKNRVEDVLLNKKMDVLLNNLINKTGRELNDISEKNLAEARYFEQMRELFIINNEKAIKKVNEKIANIKDRQKKFEEYEQQSLKLDSEILSETSDDEFEYDLDLSDLTITK
CP001621.522	locus_tag=MMCAP1_0569 protein=putative membrane protein protein_id=ACU79154.1 location=682745..687712 gbkey=CDS	12.8	17.5	15.4	14.7	12.1	17.9	3	3	8.59514	14.6955	11.8029	26.6738	21.6174	32.048	MMCAP1_0569	MVGGIINHSYNIVSNSKWITFKSTSKDFPSFIKDEIVEYKTQEWSIPSLKNYGSYFSLINPDWTEEMNERHLSIITSFPNIEFSGIAPKDFPKEFLHTYPYLKYHKGFRAETTVSSFEALLSSDNVNRYNRYIKDGYRSVGNYDISETKKIENPIGLKSFIQDKKQQLNNKEVVELKLIEEYEDVFYRINYSSAYETEKGNKIEYSSNSTPLTNIKLQVTYKEVKTNPIAKFKSSWNKWQEKFNSLNDITIESDTTGDLNTKLSESVDRDFKSNKQILDEKIAELNNELNNELTLSYKQLDDKHIRLFLNSKTSDFKNQLFISAIKVSFKPSNKANQKIKTQELDSRLKISLGKWVDFNTETTKLVDDVLVRDTSVSITSSGSSRNAGRWIAHTPLKVS…
CP001621.523	locus_tag=MMCAP1_0570 protein=conserved hypothetical integrative conjugal element protein protein_id=ACU79773.1 location=688168..688914 gbkey=CDS	840.7	630.5	756.7	192.1	180.6	197.2	3	3	564.526	529.459	579.95	348.575	322.653	353.065	MMCAP1_0570	MNSGMYGKVFRFRNLDNTLPIARDSLFKNIPTDNSKLHRPYVVFYSDDKVYFLTVKTLKEKNKNNVEKHIDTNVILLNKTVYNQSIKGEAIGNVIDCSVVNIMDRKLFEQLYQEDEYYNNYQLAPWIYDEVMNKLYENKDNLIVHQFKAFDFENNKTLWYETTKSNDKQNSNDNNKWLVRAKKVITTVIETYHSISRDEIEKRLNNQDEYVKFISPIYYNELEDVYTSFEIDDKWEECQKSNSNKHKV
CP001621.524	locus_tag=MMCAP1_0571 protein=conserved hypothetical integrative conjugal element protein protein_id=ACU79848.1 location=689110..689475 gbkey=CDS	1713.1	1304.5	1559.2	275.8	256.4	283.1	3	3	1150.34	1095.45	1195	500.452	458.074	506.86	MMCAP1_0571	MKDSKTEFDLTISNAFEDDFGMELEEKVAKQKAKEKEDLAKSFINKNSISQNVQIERDLFLKKDKKQSNKPLKVGLYITPEVNAKYEELVQLYKDKYGKAPTRTDVFVQGIGIMIDRLKDK
CP001621.525	locus_tag=MMCAP1_0572 protein=CobQ/CobB/MinD/ParA nucleotide binding domain, putative protein_id=ACU79540.1 location=689699..690613 gbkey=CDS	30.1	29.1	30.7	NaN	NaN	NaN	3	0	20.212	24.4366	23.5291	0	0	0	MMCAP1_0572	MKKTNVISFGGLKGGVGKTTLNLNVAGALAKQNKKILVIDFDPQCSITQVLRKSVEQIKNVLGSEKWLEEETNYDELKNTILESFIPNIDFVPATSILEKYNRQLVTLANREKFLLSNIVKIGEEQHLLSKYDHIIIDTNPAFDPIAENVYMTCAFRGGVIQIINDDPFSLTGIIKNLKLWNKRYMSDRFFQVPNALKGILINKFKANNLSKNIVNILNNDDFVYKDLVLKTVIIENAVIKKSIFQQKNKKGDLKLDFAVDSKKLNKWIKPKWIKENITLDNLIKDGNPIINLIKELQNMNILY
CP001621.527	locus_tag=MMCAP1_0574 protein=putative liporotein protein_id=ACU79531.1 location=692482..695022 gbkey=CDS	393.3	478.7	434	729.1	737.3	702.5	3	3	264.099	401.986	332.626	1322.99	1317.23	1257.75	MMCAP1_0574	MKKLIAILSSMMMITTASLPIIACHVKEKKFDTNNSITNTQTSISLFAKELILADQLKVNLKEIKTENNKKSLTDLLKEDNLKLDDTDKDISNITTLDTLVDHYFIKDSYLSKDVLDSKIKLDNQTKKPSIPLFNEVFKLFGIDTTDLDKLSDDILKILDLTTSLNPIFLVSSFDSANTTLKSFFEKVKPHLKTGLEKLSNPSVQFEKEVKVFQDKIDVNNKYKDLKVEDLDNAFYVSLCNAIGLSTVGSSYKPIELKTGEASKSLKQASEALTKALNGPAKPANGNELDIIGYILEALQFLQIKLSLFESARDFTPKSANNLFGEKITNQDFIKNTYDKKAIATITDNKPSSINLKYILSFFAKPVKELKDNDSKDGFELQKLLAILFLSTTKVEYPE…
CP001621.528	gene=atpD_1 locus_tag=MMCAP1_0575 protein=ATP synthase F1, beta subunit protein_id=ACU79676.1 location=complement(695078..696457) gbkey=CDS	2641.7	2270.7	2294.6	2697.1	2609.5	2485.6	3	3	1773.89	1906.81	1758.63	4894.02	4662.03	4450.2	MMCAP1_0575	MNGKILSISGDVIEVQFEKSNLPSINHLLTTHDNQTYLLVKSVINETNIKAIIIYAYKQISLSDEIINTNKSFMVPVGSKAKNNIFSFTGISLNNKKDDKQEYVEMNSTINNKRELSTEFELIETGIKAIDFFIPIFKGFKLGIFGGAGVGKTVLMKEIIFNVNNKYKNTSNIFIGSGERSREGIELYDELTESNLMKNSTMFVSKMNESPGARMSIVPIGVTAAEYLRDVKKEDVLLFIDNIYRFIQAENEVSATLGKKPSVGGYQSTLESDVANIQDRLFKNKNGAITSFQTVFLPMDDLSDPSAVAVFNHLDSNLVLSRDQAAKNILPAFDPLASSSSSVDETLIGKKHFNAIIEVKRILKAYKDLEDVILILGFDELDAESKILVKKALQLENFF…
CP001621.529	locus_tag=MMCAP1_0576 protein=F0F1 ATP synthase subunit alpha protein_id=ACU79187.1 location=complement(696457..698004) gbkey=CDS	1065.9	979.1	1072.5	1084.8	1102.9	1053.3	3	3	715.746	822.194	821.986	1968.42	1970.4	1885.82	MMCAP1_0576	MNIKTNSKHTSPKISAIYDYIVEVKGEFDYKQQQIFTSKKNKEARLFLISATSDTAYLLANLQALKLTINDELELLDNTNEIFTSNEYFGKVIDIYGNIILPEPKTVVKKAEDISSEVFKLSHDLMKVQRLNEQLYTGLAAIDLLIPIGKGQRELIVGDRQTGKTHIALNTIINQSARNIKCVYVAIGQKKESISRIYNILAQHNALKNTIILDAPANSSYEQYLAPYIGMTHAENISNTDDVLIIFDDLTKHANIFREIALLSNRPVGKEAMPGDMFFAHSQLLERAGSYKNKKTITALPIIQTIDNDITSLIASNVISITDGQIVTSSKLFSQGILPAVDIDFSVSRTGGSVQDKTIRQIAGQINKTYRKYKRQLKLSMLDYNLNSETADLMYKGKM…
CP001621.53	gene=mmyC5VM locus_tag=MMCAP1_0056 protein=GATC--recognizing Type II restriction modification system (MmyCV) adenine DNA methyltransferase subunit protein_id=ACU79327.1 location=complement(71840..72679) gbkey=CDS	606.6	504	458.9	52.4	57.7	56.9	3	3	407.329	423.231	351.71	95.0823	103.085	101.873	MMCAP1_0056	MEKAKYNLTPILKWVGGKRQLLNEIIPLIPEKINTYVEPFLGGGAVLFFVQPKKAIVNDLNKELINVYNTIKNNPKELISKLKELKSLNSEEYFYDLRSLDRNDNFQQLDNVFRAARIIYLNKTCYNGLFRVNKAGQFNTPYGRYKKPNIFDLNNILEMSKYFNDNNIQIINKSYEEVLKNLKKGDFVYFDPPYMPLSNSSSFTGYTESGFDANQQIKLKQICDALNKKGVKFLLSNSDHPFIKDLYKNYTITIIKAKRAINSKSDKRGEINEILVRNY
CP001621.530	locus_tag=MMCAP1_0577 protein=conserved hypothetical protein protein_id=ACU79070.1 location=complement(698009..700312) gbkey=CDS	150.3	210.7	166.7	391	367.6	386.1	3	3	100.926	176.934	127.762	709.488	656.74	691.27	MMCAP1_0577	MKKNKLLSKSYKIAILLLTSTSSLSLTALIKNTHHNNNNTVLKLYQDGSRSSGSGSSESGTGTGTGASGTGTSSSNGGSSGNNANGSETPGKPEISKEFGTFKDKVKTKIDDTVKKVYKRISSILDDELNKLPKLDKSTEKPADYFKNLQKRVYLTELKKHFGKEDEFIKEPSKYGFDVTFPNVLANDKKVDTAIVKFNGKTYNNIKISPTDHDRDYTKIIESERKDGVEKNNKQQDNVITSHRFDALLDSYSQAWLGKLKDIIYKEDQDLPEFGKDIFFSQQKPNGTNGSENTTTVDGYNIELKKEHKTWKDYIKTKIKNRFVDFDLNQNQSFQFNTQSSNSSKPTPPNQPDLNKKPLDPTERRDQNSVEYAEQLPRLQPILKWQYADHNKESIKSSF…
CP001621.531	locus_tag=MMCAP1_0578 protein=conserved hypothetical protein protein_id=ACU79309.1 location=complement(700314..700757) gbkey=CDS	14.5	17.1	15.4	159.3	158.1	170.3	3	3	9.73668	14.3596	11.8029	289.057	282.455	304.904	MMCAP1_0578	MAFSVEINFIENKQTINFNKAIVYFNADEENEWISLTNNSILGYEIMLLKILDLSNNQEKYLFANNVNIMVKNNHIIINTFSKQNFLVKSNRKKVYQDQLKELHKQISILQANQTIGLTIDSLLELKKLKNKYYVLKLKNLLQLKGE
CP001621.532	locus_tag=MMCAP1_0579 protein=conserved hypothetical protein protein_id=ACU79268.1 location=complement(700757..701668) gbkey=CDS	447.4	424.5	437.6	663.1	624	608.2	3	3	300.427	356.472	335.385	1203.23	1114.81	1088.92	MMCAP1_0579	MDLKKVETKLNNLKTIQQRLSNEKNILLIDMIKQNALLNYYVKNALWNQNIISLLQNEYKIKNNLISELKISKNKLINKLKDFISQPKELWIYLTEEQKYSTDSYSRYENHILNSIKKNNADFIVIGDRAKQFCSDNKLNVIYNVDQKQAISKLSWTLTLIIKFLFSQYNYKSLRFVINSNKNKDNSFTILPLTKFNVNSLSETETKFDLDHIKEFKIFPDINNYIQTQIDNYIENSIQSLLVESSFYKTKNELIKTNKTINEVDEEIKKLNKKIIRIKREKEIEEIVLLTSNNKKFLIRRDQ
CP001621.533	locus_tag=MMCAP1_0580 protein=conserved hypothetical protein protein_id=ACU79663.1 location=complement(701670..702164) gbkey=CDS	100.1	100	101.4	406.8	420.2	429.8	3	3	67.2166	83.9745	77.715	738.158	750.713	769.511	MMCAP1_0580	MKHKNKQTSDQSFIVFDLYKKIVNANNYIDYQKLLATVLLENQIGFDSKVYKEFENSYLLAFKNHFDIVLNDFVITFNVNLKISSDLLVPMLSETESSNTEAINLKTSNDEQYQKFLTTYNNYFISLIKQGFCVEIFPNVILFKSKNTDHLKIVFDKTKVLTRG
CP001621.534	locus_tag=MMCAP1_0581 protein=putative membrane protein protein_id=ACU79470.1 location=complement(702139..703602) gbkey=CDS	11.1	70	108.6	9.8	9.5	12.3	3	3	7.45359	58.7821	83.2332	17.7826	16.9723	22.0218	MMCAP1_0581	MISLKVEQQKFYDDGSNLILETKKNKIVSIYKTIVLSFFFVSMSLLLFLSNYSIFNKNIENSYQFLFNFSQPAFEQYNWVVLFRICLLGFLYFYGLKKAYINIEPNKPYLKQYTIWFNLYLITSISAFILFFTYSPLEAQNIINLIYSLIGLLLIDISYVLFKYKTRKKLNPLVYQNKWSLIVDLISRTVLVSLVLTIFLVWINQGGETYEMLANNKFYEYVLNLFGIKSFLNFLIIITSFIFIGLLFIGLNIYTILKIVYKQFSFEIIRDKLNFYLTGVIVVFIWLISLVLLKIPSTHEVFVKNNDLEYLYLLFSLLNIIITIVYLWFKQFKNRLNSPLIKISYLTIFHFIIWTVFMVASFLTTSSTVSMINLLITIVLVAISYYWHIKSSRFNNYYN…
CP001621.535	locus_tag=MMCAP1_0582 protein=putative liporotein protein_id=ACU79518.1 location=complement(703634..706219) gbkey=CDS	273.4	361.1	337.2	613.5	655	630.3	3	3	183.587	303.232	258.437	1113.22	1170.2	1128.48	MMCAP1_0582	MKRLNKLLMYISSSTLLLPITLLVACTPSKVVAKPINDDEFNKLIDSIKTENDLLKYADIRFKNPNGADTKKEDIIPSQLKSENISITFKGKYQGQISAVVTNVDVDRTNPFAVQNEATIFVQFKNLKTNTSKPISITIKGLNQKGNFDASGNIVVDDFAYFGGTSGYDEYTKKDQKSRFDYDNERYMTRLKSQFGNSSNSINLKEYRGLETKQENIKKFDDQAAISNFDTYYNAALKGFTLPVYGSDGKVSGLKIYEGAEIGKGPSVVDSLGRNEKAKTVGLARTLPNEEYKTSAIQTFQTNFTIYKDYEKEIEEAEDNIKLFDSWNEQQIQSYISAQLTQLRLNYEDEVSQIDREISQTQPDKTTILSNLNQKKSKIESEYQKELSTISKLNKDSLK…
CP001621.536	locus_tag=MMCAP1_0583 protein=mycoplasma virulence signal region (Myco_arth_vir_N) family protein_id=ACU79142.1 location=complement(706242..708494) gbkey=CDS	24.4	30.8	12.5	57.3	56	50	3	3	16.3845	25.8641	9.58025	103.974	100.047	89.5196	MMCAP1_0583	MYFLKKKKNKILTIALVASLAASVSFGSVLYYSFSDNHISFDTSSNGITDAELAPINNAINDAIVSNRDNKLKPSEEKIIKETEKKIEEKIIIPPAKKEEKIEAAKPIPKPVVRKPETKITSPKITRRKQTITIAGIEVEAEIEGPPGFVTHQRDKDRKISNPTKPYQNHTVNKILSVKVTDKLKEQVAKDALSGGNGYDEGVGLFNNSIFNVFKEEFNSGKELNDILSSLESVARQNSGAFQNTLERYKKMLDSNNVINFLKSEAQKEYPKLKSKFQTKNQEYIWLIANLDQSKFTKIASTSEKYLEKGLTISPRSAFINEAGEIDSNGWGPPDEYNTVTSRLRRDNSEYRVFDYDEYYSRSSDRIANGTYPGWVKEDVSEPYSKKYNFKASDGIRFS…
CP001621.537	locus_tag=MMCAP1_0584 protein=putative liporotein protein_id=ACU79710.1 location=complement(708766..711336) gbkey=CDS	167.4	244.6	193.8	313.4	327.1	312.9	3	3	112.408	205.402	148.532	568.679	584.384	560.214	MMCAP1_0584	MKRVNKLLVLLSSTTLTLPLTLLVACTSTKQAPKSIDDNEFLKVVDSIKSEEDLLKYADLKFKDSRGSYINKGDVIPSQLEKNQVEITFKGNYKGQIRAEVTTVNNDPNNNGSSSSVRLYVEFKNNKTGKAKSINFVVTGLNKKGVVDPFRNSSVNTISYFDDAGGFDSYSNKTQKDRFSYDNKKYIESLEGQISPDKKPINLKTYRGLETSQDNIKKFDEKASASSFDTYYNAALKGFTLPVYNDKGEVSGLQINDGPEINKGPSTVDSLGRDRFKTNGLARTIPNETYKTAAIQTFQVSFTGHKDYAAEIEEAEDNIALFKSWDDNRIKIYIDTQLDQLRRNYEDESQQIEKQLQSTDKSYTSILDKLNKQKEKLKADYEKDLNQISKLGKDGLVKW…
CP001621.538	locus_tag=MMCAP1_0585 protein=mycoplasma virulence signal region (Myco_arth_vir_N) family protein_id=ACU79097.1 location=complement(711356..713605) gbkey=CDS	95.6	75.5	88.9	47.9	54.9	45.8	3	3	64.1949	63.4007	68.1347	86.9168	98.0823	82	MMCAP1_0585	MHFLKKKKNKILTLVLVASLATSLSFGSVIYYSFSDANISFDTSSNGITDAELAPINNATNDAVVSNRDNKLKPSPKEEIRKTDSTEKLVIPTVRKDDKVTEAAKPEFKPEIRKPDSSNIKPTVTRSTRKIYISGVEVEAEVEGPPGFHVHKEDVARGIANPKKPYQNQSVGKILSVKVTDDLRRGVIRESLTGGEGYDSGAALFNNSLFNVFDKDLSNTNDVEKTLEELEAVANQNASVYENTLERYKRLLDSDNVVNFLKPGAKEKYEELKPKFKTNKQRYIWLIANLDKNKFTKIASTSEKYLAQGLTISPRSAFINEKGEIDSNGWGPPNEFNTVTSRIQNDNSNYRTFSYDTPYNRPSDSIESGNYPGWTKRDVTNKYTSEYDFKAGEGITISE…
CP001621.539	locus_tag=MMCAP1_0586 protein=putative liporotein protein_id=ACU79217.1 location=complement(713798..716353) gbkey=CDS	70.2	71.7	67.6	125.3	115.7	119.9	3	3	47.1389	60.2097	51.81	227.363	206.705	214.668	MMCAP1_0586	MKKWNKLLTLVSLSSLALPLTLLVSCIPANKKAISKSINNKEFVDLVNSIKTEDDLLKYADIKFKNSLGSYINKDDVIPTKLEKNQIEIIFKDPYKNQIDSEVVNVITNKSNGFASINEAILYVEFKNNKTGKTKSVNFKVTGLNKNNTYDASGNIISNGLDYFNGEAGYVSYTNKNQKQRFEFDNKKYVKALENQINNGSTVDLKTYRNLNTKQEHINKFDKLAKDNNFDSYYNAAIKGFTLPVYDDKGEVSGLQINDAPEVNKGPSVIDSLGRDQFKTNGLARTIPNEVYKTAAIQTYQVTFNWWKDYSEEIEQAQEYIDLFTSWTEDQVKNYISRQLHQLELNFKDDTREIEKQLKETPSDREGIIKTLKKQKDEIEAKYKQDLEKFTKLNKQGLI…
CP001621.54	locus_tag=MMCAP1_0057 protein=conserved hypothetical protein protein_id=ACU79171.1 location=73148..73438 gbkey=CDS	771	985.5	1105.1	163.5	166.1	158.8	3	3	517.723	827.568	846.971	296.678	296.748	284.314	MMCAP1_0057	MFRKIFKILISLVLAAIVILIGIIILGFSADKTDLNFLQRATNVLKDHTAVQLLKLELPNLQQKIGVLLVIYIGPLIFLTGFVWNFFRLLFSVFKK
CP001621.540	locus_tag=MMCAP1_0587 protein=mycoplasma virulence signal region (Myco_arth_vir_N) family protein_id=ACU79280.1 location=complement(716368..718620) gbkey=CDS	14	15.4	11.7	3.1	2.3	6.9	3	3	9.40093	12.9321	8.96712	5.6251	4.10909	12.3537	MMCAP1_0587	MYFVKKKKNKILVYALLASLITSLSFGSVIYYSFSDANISFETSSNGITDAELTPINNATNDAIVSNRDNKLKPSPEKIIKESEKQEPNKLIIPKKEEKEIKEVVKPEIKPEIIRPETSKPKPSTTRLKTKITINGVTVDAEIEAPPGFVVQPNDKTRNIANPTKPYQNHIVEKILSIEVTNELRNSVIKDSLSGGEGYDKGAGLFKNTLTNVISREIDENKGDIHKALESLEAISNQNSNFFNSSIERYKRLLDSDKVIEYLKPEAKAQYPKLKGEFKTKTQEYLWLIHNLDQSKFTKIASTSEKYLKEGLTISPRSAFINENGEIDSHGWGPPDAYNSVTSRLQRDNSTYRVFDYDQYYNRSSDRIENGTYPGWTKTDVTDEFTSSFGFKKGDGITI…
CP001621.541	locus_tag=MMCAP1_0588 protein=putative liporotein protein_id=ACU79423.1 location=complement(718840..721401) gbkey=CDS	55.5	74.5	60.3	197.9	193.3	196.9	3	3	37.268	62.561	46.2151	359.099	345.342	352.528	MMCAP1_0588	MKKINKLLMLISSSTLLIPLTLLVSCKSVNKKTSKPLSDNEFISLVQSINSEDDLLKYVDIKYKDPSGDQITKESVLPTRLSNDDISIIFKDLYDKQISANVTNIKLETTNNPFEVINEAIIFIEFKNTSTSKTKTKEIKFTGLNTKNTVDNSGHKVLDELEYFNGEAGYTNYTNLSQKERFKFDNDKYIKRLESEFGGSNIDIQKFRGLETNQDNINNFDKQAESSNFDTYYNAALKGFTLPVYKDGKVSGLKINDASETIKGPSPIDSLGRNQKAKTNGLARTIPNKTYKTAAIQTFQVSFKGWKDYAQEIAEAEYYIKLFEKWTDEQIKQYIARQLWQLEQNLKYDLNLVEKDIATTRPDLTGVIAEHNKKKARIQSEFEQEKKKISALNRNKLVQ…
CP001621.542	locus_tag=MMCAP1_0589 protein=mycoplasma virulence signal region (Myco_arth_vir_N) family protein_id=ACU79814.1 location=complement(721421..723679) gbkey=CDS	80.8	61.8	45	20	20.2	21.4	3	3	54.2568	51.8962	34.4889	36.2909	36.0886	38.3144	MMCAP1_0589	MYFLKKKKNKILIYALLTSLATSLSFGSVIYYSISDANISFETSSNGITDAELTPINNAANDAIISNRDNKLKPNPEKIIKESEKQELNKLIIPKKEEKEIKETAKPEIKPEINKPQSSTIRQTTSRSKTKISINGVEVEAEIEGPAGFHVHDQDRTRKITNPTKPYQNHTVGKIISIEVTEELKKSVLNNALVAPDGHEDKGAGLFNNTLMQVFDSELNGASDVIKALETLEAIGRVNSDFFKNNIERYQKLLDSPKVVDFLKEDAKKKYPELKTKFKTKTQEYIWLIHNLDKSKFTTIASRSEKYLKEGLTISPRNAFINENGEIDSHSWGPPAQFNTVTSRMQRDNSEYRIFDYDAWQTRTPGDIDAGNFSGWKKENVTSQFTNKFNFSENDGITV…
CP001621.543	gene=mmyCIres locus_tag=MMCAP1_0590 protein=Type III restriction-modification system (MmyCI) endonuclease subunit protein_id=ACU79479.1 location=complement(724278..726707) gbkey=CDS	24.1	20.2	17.6	1.7	1.8	NaN	3	2	16.183	16.9628	13.489	3.08473	3.21581	0	MMCAP1_0590	MRLTNKQEFVVQQIVDKYHLENKKIIDFQAPTGSGKTFMMINAIDKLITTYPNEKFTFVIVTLSTAELPKQLYDNLNDYKQYLDNNITIEYQESPSSSNSKLKDQHFQIKAKQNNVLILGTQSFGKNRIFTEQGIIHSFLDEIKNQDYKLVYIRDEAHIGGETSITKYLDIDFDDDFTKQITKISKYEVRFEFLIQNTAHYIIKTTATPKGNHELVLLTEQDLEEDNMMLIKSKPFFNKGLEKISEENIQDEDILNQACNEFKQIKEKYWKDPDLKNINPAMLIQVQDKYVKTEEEFNIRINRIIDQLNNHNLTYVKYFGSNDVESNIRVSKITLKQISKNNSDVDVIIFKVGPATGWNIPRACMLVQLRNVSSESLTIQTLGRIKRNPNPEVIFDNNS…
CP001621.544	locus_tag=MMCAP1_0592 protein=CdsF protein_id=ACU79222.1 location=complement(728751..730223) gbkey=CDS	841.5	694.8	648.9	65.3	82.1	88.2	3	3	565.063	583.454	497.33	118.49	146.677	157.913	MMCAP1_0592	MSNIKFRIIDKYRIELLEDAIKGSIIDLNNADQIDLSIILDQINKQKDQVYLEKLNDYKTKWELEKSNQIQQFKNDLINEYNKKFESTTTEISDLKATNKILIEKLENNKKEFLKDLDNNKKIWETSSDKKIQELKTELLKNNKKEFEQLISQKLELESNIKLLNEQLNKQEELIKLQLENQYIALLNKQKENFEQQINQLKDELTKNTYELENNNWKHKTELTEIITTKNNKINELEKDLEIVKREKLTKNIKLVGEELENYCLNQFNEASMFAFKTSTLIKDNIVIKNEDDLKGTKGDFIFKVYAEENKQNLLLSVMCEMKSEQLNSHNKKKNSDHYKKLDDDRNKKNLDYALLVSELEYDTNDSLIYRVNDYKDMFVIRPMYFISFLGVLETIALK…
CP001621.546	locus_tag=MMCAP1_0594 protein=putative membrane protein protein_id=ACU79559.1 location=complement(730856..732634) gbkey=CDS	NaN	0.4	NaN	1.2	0.6	5.1	1	3	0	0.335898	0	2.17746	1.07194	9.131	MMCAP1_0594	MSSTVNEKQQRARKLFGETPISKAIWIVAIPSLLASLMVGLYSFIDQIFILQFVPKYSNVFGNMNSEIMKYLDLSLHNLTTNDLFKSYNEMLDAYNQQAGMLNASKLTVINSNTIVSISTASFAPLTIFSNAIVYLVPVGSSIYYTKCIGKRLEKTGKNLWATMFWVCIMLSIFSSFLSFIAIWSGLIDKIAGVTQIDPNIASRANIDVLRLQDFYNAAHKLSVQWAKQYVYIYASATILNSLTLYLSYFIRSEGYNTYVMFCAIVANLINIGLDALFIIVFKMGVLGGVVATVIGWVFNTFAYIIYIVIKDHKQKTWLSIKSLFMFKFNKKLLGPIFLLGLGGFLRTFGIGFSFLVMNLLIANSQFAMPEYFQFYWAKGQPIVTLFLITIFGISDGAR…
CP001621.548	locus_tag=MMCAP1_0598 protein=conserved hypothetical protein protein_id=ACU79603.1 location=738772..740298 gbkey=CDS	557.4	462	500.1	369.3	378.8	380.9	3	3	374.291	387.962	383.287	670.112	676.75	681.96	MMCAP1_0598	MAKKKTNIKIASKNKKEQNDKKKKKKYLIVLAGLLLGTSLITGTTVGILKNRRKVVRKDDKNNKTVINLENTININSRFLPILYTENKSDILKHINTKINKIRAYKKNINLSLDDVDLVLLKDTNSVKVVAKPSQNKYQGLIEISFRKTNVDQVLNSKDKNLGNFDNIDHEKIINKIIELNKDNLQNINFNDHFDIEIKNNVVTIKAKPSSHFYKGQITGYKFKIRTKLDDLINTEEINNYEFDLKPDNKKIIDLIIEKNPELKDLDFEKDFDIQINDQKVIITPNSDNYSDKLEIDFKVKPEPKKDQEEVLDKDDETELKEIGYFKNNYGQWQIQPIPKNVKKVPEVLPGFITNLKGAFKDNVNTEIIGLDKWDTSNVTNMIDMFKDAKNFNQDISSL…
CP001621.550	locus_tag=MMCAP1_0600 protein=RNA-metabolising metallo-beta-lactamase family protein_id=ACU79133.1 location=741391..743223 gbkey=CDS	1180.6	1288.2	1390.5	377.8	380.8	407.4	3	3	792.767	1081.76	1065.71	685.536	680.323	729.406	MMCAP1_0600	MSNIDKKDLDILNEENENLINTFDDDGDQLNISIDEKEFKPYVFKQKEVKRQYQKTNIPTKIFALGGLEEVGKNTYCIEYDNELIMIDAGVKFPESTMLGVSAVIPDYSYLAENQKKIKALFITHGHEDHIGGIQYLVQQVKIPVIYAPKLAAMLIRDRLKEYKIEDKTIVKEYDADDVWKTKNFKVSYAALNHSIPDAFGILVQTPNGNIFSTGDYKFDWSPLGHFAELTKLASMGENGVELLMADSTNSEVEGYTQGEKSIISNIDKLFLQAKGRIFLTTFASNVHRIQHIIETAHKYNRKIVILGRSFERIIKIIRQIGHLKISEKEFIKSTDIDKYKPEELMILTTGSQGEPMAALSRIANNKHLSINIIPGDTVVFSSSPIPGNRADVEKLVNK…
CP001621.551	locus_tag=MMCAP1_0601 protein=putative membrane protein protein_id=ACU79842.1 location=743298..744242 gbkey=CDS	156.1	279.2	239.1	16.9	16.4	13.5	3	3	104.82	234.457	183.251	30.6658	29.2996	24.1703	MMCAP1_0601	MKNNNSSFFSSPRTQIKVFQWVGTIFAVIGMLISLYFLSKINPQQLDQPKQVLLSLGYATMGYMFWKTIISAVIILRFVKKSTDEELVANRYILASLSLNLGGFLTPWILTSLPNVTTQSTIKPKWFLSRSFAIITTIGSAIFLGILFWQLKIIGPNTNWFDQTKEWYWILLGFIIGNGVLLVVGLLAFILFFNKNSKERFEGNTFTSFLMKTIAVFYLVIVTVELILLMIYSILRLIGNILNTARRVLQADNMFIGVLYLLFGLLSTFFQIYYVIFLTIMISQTIKGIWRKDGVITIKVYDKIQDNKNKYDLR
CP001621.552	locus_tag=MMCAP1_0604 protein=LemA family protein_id=ACU79659.1 location=746139..746807 gbkey=CDS	6260.5	6447.4	6068.8	4959.7	5027.4	5007.6	3	3	4203.89	5414.17	4651.25	8999.61	8981.76	8965.57	MMCAP1_0604	MANQLDEMNDPILEQGRQVNVINKQIPITVGKGSLVFEILLWILGIIPGIIFTFIKIKAKNHLAQLEQKVQHNASQIDNYLDQRAVVMQNLASLLSKSIELDKDVMKTVAAYRSGINVNDENRSDVASQLDTTIRGLHLQIENYPDLKAHESIKQALQQNLYLQKEITAARDIYNDTVFQWNRSINEWPAKMIVAAKMHYTTRIPFAASAETKKLASQDFFK
CP001621.553	locus_tag=MMCAP1_0605 protein=hypothetical protein protein_id=ACU79533.1 location=746990..747298 gbkey=CDS	42.8	74.9	54.3	144	140.9	130.1	3	3	28.74	62.8969	41.6166	261.295	251.727	232.93	MMCAP1_0605	MKKILTLLCLIGLIGLIGLTNLNVIGCGNKPNSKLNNNNNNNKNDDYDFEIKSNKNNSEKDTKTKPKTTSKILIKPEIKPKLDVKPITRSKSDKRLKIIPHQ
CP001621.554	gene=pgk locus_tag=MMCAP1_0606 protein=phosphoglycerate kinase protein_id=ACU79386.1 location=complement(747565..748779) gbkey=CDS	21049.2	15816.9	17280.7	4769.9	4701.7	4821	3	3	14134.4	13282.2	13244.3	8655.21	8399.88	8631.48	MMCAP1_0606	MNYNNKKTLKDIDVKNKTVLVRVDFNVPIQSGVITDDNRIIAALPTINYLLENDAKIVLFSHLSRIKSKEDKLKKSLAPVAKRLEELLNKQVKFINQTRGQELEQAISSLQSKEIILVENTRFEDVLDDQVVKYESKNNYELGKYWASLGEVFVNDAFGTAHRAHASNVGIASNIKVSAIGFLVEKELKMLSQAVNEPKKPFIAILGGAKVSDKIGVIENLLPKVDKLLIGGGMSYTFLKALGKTIGKSLLEEDKIDLAKHYLEIGKDKIVVPVDTACAKEFADVSPTIFEGNIPDEWDGLDAGPKTIELFKQEIKKAKTIVWNGPVGVFEFKNFENGTKSVCQAIAEQTQNGAFTLIGGGDSASAAINMGFKDKFSWISTGGGASLEFMEGKELLGIS…
CP001621.555	gene=gap locus_tag=MMCAP1_0607 protein=glyceraldehyde-3-phosphate dehydrogenase, type I protein_id=ACU79226.1 location=complement(748891..749907) gbkey=CDS	35452.4	25719.8	29417.8	8273.8	8611	8511.5	3	3	23806.1	21598.1	22546.4	15013.2	15384.1	15238.9	MMCAP1_0607	MSKKVAINGFGRIGRLTFRQLFEKDIEIVAINDLTDTKTLAYLLEFDTAQGIFCEGEISHTDNSIIVKGKEVKVFAEKDASNLPWSELKVDLVIESTGFYTDKEKASAHIKAGAKKVVISAPATGDLKTVVYGVNHKSLTSDDVIISGASCTTNCLTPFTKALDDAFTIKKGFMTTVHAVTNDQRLLDLNHKDVRRGRAAAWNIVPSTTGAAKAVSLVLPHLKGKLDGYALRVPTITGSITDLTVEFENQELTVEQINNAVKKALEADADLAKAMKYETRPIVSSDIIGSKYGSIFDATLTKVMNVDGKQLVKVCSWYDNESSYVSQLVRTTIYFMSL
CP001621.556	locus_tag=MMCAP1_0608 protein=primosomal protein protein_id=ACU79182.1 location=complement(750008..750946) gbkey=CDS	86.7	28.5	72.9	NaN	4.6	NaN	3	1	58.2186	23.9327	55.872	0	8.21818	0	MMCAP1_0608	MKLSDYKNNVKIKKLIEDSQNSNDIITDKVLLENQNILDEFLLNYKECNLDTKCEQVVKNYQVDLVFKDHQFYLKNVLCVHGKQTEKLFIIKKNYWFCDFDLNLFHLTIDEYFNTQLNNATFTLLDQNEKNIRKTILKTIIKQIQKGYKKGFYLYGNSGVGKTYIFKVLANTLASKNKTVIFSTLRSLIDKLKESFNSSEINSLTLIKKIKTVDFLFLDDIGGENLSLWARDDFLFEVLNYRMENQKPTFFTSNFSIDLLEKNLQFTKQYNIFLTTQDVFKLEKIKIDRLISRIKTLAKEINLTGKNKRQTN
CP001621.558	gene=mutM locus_tag=MMCAP1_0610 protein=DNA-formamidopyrimidine glycosylase protein_id=ACU79733.1 location=complement(752297..753121) gbkey=CDS	530	481.7	481.8	54	59.3	57.7	3	3	355.892	404.505	369.261	97.9855	105.943	103.306	MMCAP1_0610	MPELPEVVTVTNTIKPKIINRTILNSQIFTNKIISSTSVDQFINLTKNQKIYDVYNLAKYIVIELKEHVIISHLRMTGKWVIENSDQYAYKKSWLRAELLLDNNLVFRFYDMRGFGTLNLYNKQTFLKDSHLDKLGPIPLNNQTSVDYLFNKLQKSNKAIKTVLLDQHVISGLGNIYVNEVLFLSKINPLTSANLITRDQTNEIIKNCETVLSQAILLKGTTISDFESLPGITGGYQTKLLVHMNNKNCKICDTKISKIKVNGRGTYYCSKCQN
CP001621.559	gene=polA locus_tag=MMCAP1_0611 protein=DNA polymerase I superfamily protein_id=ACU79647.1 location=complement(753132..755867) gbkey=CDS	120	95.6	107.5	15.8	21.2	12	3	3	80.5794	80.2796	82.3902	28.6698	37.8751	21.4847	MMCAP1_0611	MKTKILVVDGNSLIFRAFYATAYSPNTSLLKTKSGVLTNAVYSFINMLLSVIHQRGPYDHILIAFDKGKKTFRHDLLSDYKANRIKTPNELVEQFSVVREFLTKANIQWFEQENIEADDIVGSICKYAEKQFDNLQAEILSSDKDMYQLITNKVICLNPVQGVNELEEVDTNKLFEKWQILPNQVPDYKAIVGDSSDNLKGVNGIGQKGAIKLIQQYQNLENIYNNLEQIKGAIKTKLEQDKKMAFLCKDLATIKTDVILENFSFKKLDFNVDNIYEFLNKYEMYSLKKRFTNILNLDFNPYQNKKQNLDVKIINSWSKDYEDSINYLYVESLEEDYHKDKIIGIGISNNKGNFYLDFKNKAQQLSFFEDTTLSSTDSLFEEFLNNSNLKKYTYDIKKT…
CP001621.56	gene=ald locus_tag=MMCAP1_0059 protein=alanine dehydrogenase protein_id=ACU79483.1 location=74153..75271 gbkey=CDS	60797.5	42014.6	51605.5	5359.3	5084.5	5111.4	3	3	40825.2	35281.5	39551.5	9724.7	9083.77	9151.41	MMCAP1_0059	MKIGLPKEIKKNENRVGITPMGVVELIRNNHEVLVESGAGLGSGFSDLEYEKAGAKITKNVEDVWKQEMIVKVKEPLKSEYKYFYENQIIFTYFHLAGLKDLTEELIKNKVIAIAYETVQTPDKALPLLRPMSEVAGRMAVIIASNLLLKNTDKDALGVLVSGTPGTPKANITIIGGGVAGTSALRLAIAMEANVTIIEFNENRIRQLYETYGHKANILKSNYANIAKAVKESDVVISTVLIPGKLAPKLVTTEMVQTMKPNSVIIDVAIDQGGSVETVDHISSHADPTFIRHNVIHYSVPNIPGAVPRTSTIALTNATLTYVVEIASKGWKKAIQDNSALKLGVQTVNGKLVYKNVADSLNIQYTEIDNVI
CP001621.560	locus_tag=MMCAP1_0612 protein=DNA polymerase III, alpha subunit subfamily, putative protein_id=ACU79432.1 location=complement(755876..758839) gbkey=CDS	30.2	30.5	26.9	2	4	1.7	3	3	20.2791	25.6122	20.6167	3.62909	7.14625	3.04367	MMCAP1_0612	MNYISLLTIKNQYDFLESLITIDQYIEFIKKNKLNYAFYSETHTMYGVAEFFKKATDNNIKPIIGLTIEFEDSTKLIIYAKNKKGYQILNFVSSFLNDGFNHYDYEIKEYILELVNNNVVVVGLINDLDFKSYLINKLNNDFYDVKELNLYFNQISYLDINDQKTYNILNAIKTNKTINQIQNINNYFYPDIDYLIKNYSLENIKKVISEINSKVDFNLFDSNQKHLVKYKNINNLSSYEYLRQVCLLSLKKYQQKIKPNLDLKLYINRLNYELEIIKQMGFSDYFLIVSDYVNFAKKNDILVGPGRGSAAGSLISYLLRITDIDPLEYDLLFERFLNPDRSNLPDIDLDFQDNRREEVLEYLFEKYGKYHVGMITTYQTIGYKMAWRDVCRVFNIDLL…
CP001621.561	gene=tyrS locus_tag=MMCAP1_0613 protein=tyrosine--tRNA ligase protein_id=ACU79294.1 location=complement(759034..760278) gbkey=CDS	101.2	124.7	115.6	71.7	77	80.2	3	3	67.9553	104.716	88.5982	130.103	137.565	143.589	MMCAP1_0613	MKNNILEELKWRGLIKQITNESKILDAQNNSDAVYCGFDPTADSLHVGHLMMIITLKRFADYNFKPIALIGGATGMIGDPSFKANERVLQTKDQVEHNINKISAQLKQIIPNVNFVNNNTWLSSISLIDFLRDIGKHFNLSYLLAKESIATRIQTGLSVTEFCYTMLQAYDFYYLYKNNNCSIQIGGSDQWGNITSGIDFISDTINKNNKAAGLTINLLTKSDGQKFGKTESGAVWLDKTKTSEYEFYQFWFNQTDQDSINLLKCLTFLTKEQIDNLIKEHQNQPSKHLLQKALASEMTKFVHQQQGLDKALKLTEAFFSGDLFSLTDDLFKMALNSLPNTQINKDTKVIDALIEVKAASSKREAREFLTNKAIMINNQIIEDENTLISSFDLIQNKYL…
CP001621.562	locus_tag=MMCAP1_0614 protein=nicotinate phosphoribosyltransferase protein_id=ACU79614.1 location=complement(760287..761348) gbkey=CDS	678.2	496.5	552.5	121.6	105.8	102.7	3	3	455.408	416.933	423.447	220.649	189.018	183.873	MMCAP1_0614	MQNKTKFKFDPRVKDGYFIADYFKKTVEILKNFKHDQIITMQFFQRNDNVVLCGISEVIDLLKFASPNYDDLEIYALNDGDIINSKEPVLKITGRYQDFGWLEGMIDGILSRNTSIATNSKQIIDAANHKDVLNMLDRADNYLTLASDGYASYIGGFRLFVTEASLEYIDDKTVLQPSGTMPHALIQAFNGDTLKAADAFYKTYPNNKLVVLIDYDNDCVNMAAKIGQHFKEKLYAVRLDTSENLVDKFFINNKEYTNQTNLNGVSEQLVREVRKALDNVGCNHTKIIVSSSFSANKIKEFESKNVPVDIYGVGSALAKINIHFTGDAVLINNQKQAKFGRENIENLRLKKVK
CP001621.563	locus_tag=MMCAP1_0615 protein=phenylalanine-tRNA ligase protein_id=ACU79745.1 location=complement(761326..761934) gbkey=CDS	1415.5	1025.9	1173.8	89.7	92.8	84.1	3	3	950.501	861.494	899.624	162.765	165.793	150.572	MMCAP1_0615	MNSIKFGIFYSKQFNSLLVSFFNKKVTSTQQINNITILKNNDEIIGANIFNVDPNLNLKSGFCSEDPKAVNYVIQALKNIYEVKQELQFVIGRIIECEPIEGTHLNICQVDIKSEILQIICGASNARKKVVCVVATLNSWLPNGQQIVQSKIRGVDSFGMLCSYKELNIENDQQGIIELGSEYNNKIGESFWKEYYAKQDQV
CP001621.564	locus_tag=MMCAP1_0616 protein=EDD domain protein, DegV family, putative protein_id=ACU79810.1 location=762009..762848 gbkey=CDS	1424.4	1018.9	1222.9	969.3	962.3	1026.7	3	3	956.477	855.616	937.255	1758.84	1719.21	1838.2	MMCAP1_0616	MVNIKIAVLTDSSFDGRVSDYKDLYVIPLMIVTQDNQTYYDDENLSKDKFYNLLNSQVLKTSQTTPGDMLQMWDDLLTKYDQVIFLPISKGLSGQYNTFKMLQQTEEKYENKVFVCDTSAVSVIMQEVVNKVFDWIKQNKTANEICDLVSYLANDFVTYIIPKNLDTLKQGGRISPAAAALAKILKITPILKYDGSIDKQSTARTFKKALKEALSLLKEEIKDLKTIDISYSRTDEKTLELIETIIKEEQLEIRLKSELTNVIASHTGTDTVALVGWKK
CP001621.565	locus_tag=MMCAP1_0617 protein=DegV family protein protein_id=ACU79046.1 location=762859..763710 gbkey=CDS	146.3	202.1	180.3	670.9	667.4	626	3	3	98.2397	169.712	138.186	1217.38	1192.35	1120.79	MMCAP1_0617	MKFGILVDSAAVYDPAEFKNTIIDVIPLHIVFPNNDEYLDIKNIVEQEKILEKVSMGENIKTSQASPGELEKKYDELLEQYEHIIHIPITNNLSSMLQTATLVSQDEKYKDKITVYQNNDLAAQGIALTALSLAKAIKSNKIKTAQQAIDFIENFKEKVLIAIIPGDLKKLSNGGRAKGVITTVLNLLKTKLLIIWAKEPKKEAIGRTYNSLIEKLIKNLSNKFKKNKYKLYFLSTPLTSSKTVEIVKQILSDEKINFVHGNVPNIYTIHAGVETIGFVAIEE
CP001621.567	locus_tag=MMCAP1_0621 protein=conserved domain protein protein_id=ACU79273.1 location=complement(764474..764695) gbkey=CDS	43.3	33.8	91	128.3	1181.5	1225.1	3	3	29.0757	28.3834	69.7442	232.806	2110.82	2193.41	MMCAP1_0621	MAIYNQIVKELKSRGAKGNITKDSEFKSLGLDSLDLMDMVVTLEEKLNIRISDDQLLSLRTIDDLLKVIEELQ
CP001621.57	locus_tag=MMCAP1_0060 protein=putative membrane protein protein_id=ACU79051.1 location=75565..76389 gbkey=CDS	111.5	167.5	169.5	9.9	12.3	NaN	3	2	74.8717	140.657	129.908	17.964	21.9747	0	MMCAP1_0060	MKKYFCNLKTSISQNKKQYLIRLGCLLIGLYLFSLSIALYVPTAVGASHVDFTNFSILALFKDWAKVNEKTVEGLVAATNYKLALMSLYGFLLLVSVVFLVLSIIREYKVTKDKKLWLQLIPLIVLDVIINVGLSYVIDGQIEMLKVIGYLDWMFNQSTAYQFRTIFFTIAFVLYIAGLTFWIHSGWLLGSYNSINTNFMRLTKLPFNVSRVLMDVLIIVPGVIMLLVNPISWDIKAKFLLNYVNIGTIGFLFLAGPMLGKTLGLLNKITKIYQ
CP001621.570	locus_tag=MMCAP1_0625 protein=carbamate kinase 1 protein_id=ACU79790.1 location=complement(766435..767367) gbkey=CDS	1844.2	1200.7	1432.6	222.1	227.7	191.8	3	3	1238.37	1008.28	1097.97	403.011	406.8	343.397	MMCAP1_0625	MSKIVIAIGGNALGNSPTEQLEIVKKTAKSLVDFIVQGNDIVIVHGNGPQVGMINNAFDIANKNEVKSPILDFPECGSMSQGYIGYHLQQAIDNELKLRNINKPTVSLITQTLVDKNDVAFLKPTKPIGSFMNESEAKKLAEQNNWNISEDAGRGWRRVIASPKPIDIIEKDAILQLVNNSFIVIAGGGGGIPVYLKDDKLVGIAAVIDKDFAAAKIAEIIDAESLIILTAIDKVMINYKKENQQALDQITLAQAQEYIDQNQFAPGSMLPKVQAVMSFVKKTNGKPAYIGSLEQADKVLQNLSGTKFVK
CP001621.571	gene=aguA locus_tag=MMCAP1_0626 protein=agmatine deiminase protein_id=ACU79863.1 location=complement(767484..768578) gbkey=CDS	2461.2	1707.8	1874.7	245.8	254.4	247.1	3	3	1652.68	1434.12	1436.81	446.016	454.501	442.406	MMCAP1_0626	MSKKINSTPKKDGFWMPGEWEKHDQCWMIWPERSDNWRLGAKPAQKVFANVANAIAKYEKLTMLVSHQQFENARNLLDENVRVIEMSNDDSWMRDVGPTIVKNKDGEIRGVDWVFNAWGGFKGGLYFPWDKDDAIARKVCEICNIDYYRTDFVLEGGSIHTDGDGTLYTTEECLLNENRNPDLTKEQIEENLKQYCGVEKVIWLPWGVYNDETNGHVDNLLNVVSPGHVVLTWTDDTTDPQYERSKLAYDILTNTLDAKGRKIKVTKLHQPGPLFITKEEAEGIDVCDTMSREPEQRMPASYANYYIANNAVILPIFGDKYDDLAVKTLQSVYPNHKIETVMAREILLGGGNIHCITQQQPTSK
CP001621.572	gene=argF locus_tag=MMCAP1_0628 protein=ornithine carbamoyltransferase protein_id=ACU79579.1 location=complement(770030..771127) gbkey=CDS	3483.3	2889	2856.9	668.1	680.1	683.9	3	3	2339.02	2426.02	2189.59	1212.3	1215.04	1224.45	MMCAP1_0628	MNKVRHFIDTQELSKKEIFEIFRLMKMLKEARYCGAVPELLKNKTLAMIFEEPSTRTRVSFEAAMTLLGGHAQYLKPGELHLGVRESLYDTTKVLSHMCDGIMCRALKHETVLNLAKYADVPVLNGLTDYNHPTQAICDVFTMLEYMPATKNLEYEDIKFEDIKVVFIGDRTNVCSSTMHITTKLGMNFVHISPQKYQSPQAWVDIAKENIKQANSGSVLVTDDLEQVKGADIIYTDLWWWVDQEDEAEERVKAFKPTYQVTPELMKKAGDQALFMHCLPASRNVEVYDEVIDSDNSIAFQQAENRLTAQMGLLVYYLYPQIDKSSNAVKDYYRGKVEAFMEHQDRSWKQRYTYNNDYAENKNKK
CP001621.573	locus_tag=MMCAP1_0629 protein=hypothetical protein protein_id=ACU79077.1 location=complement(771422..771799) gbkey=CDS	126.6	163.1	184.7	NaN	NaN	NaN	3	0	85.0113	136.962	141.558	0	0	0	MMCAP1_0629	MILAKAPSSSEQEAFGLSKDIIPVSVIGLIITLAAIAFLSWLVYKNKEKIIPNKKNLGIAAIGYVVLLIALILVSVALSKYNSPRFDDIFRSDLSKKLKGLAYSGLVFSLIGAGISGFIFTKVKK
CP001621.574	locus_tag=MMCAP1_0630 protein=ABC transporter, ATP-binding component protein_id=ACU79372.1 location=772020..772907 gbkey=CDS	20.4	36.6	32.1	683.2	714.8	663.1	3	3	13.6985	30.7346	24.6021	1239.7	1277.03	1187.21	MMCAP1_0630	MQQKIIEIKNLTKKYNNGYGIFDINLEVNQGDIYGYLGPNGAGKSTTIRHLMGYIRQNKGKALIFNEDCWKHSYKIQPSVGYLPGEINYPEHENGLSYIKFIYKLRKQENWDYVEKLIKYWEFNPNIKIKKMSKGMKQKLGLVLCLMHQPKVLILDEPTTGLDPLIKNKFIQLMLKLKQNNTTIFLSSHVFEEVEKLCNKVAIIKSGRIINKLDLDLIKTTSDREYKITFKNHNIYKNEFLTNVNDLIATYKVPINKVNYFFNELKSYEINLFEEIPFSLENYFLKFYKKEGETK
CP001621.575	locus_tag=MMCAP1_0632 protein=conserved hypothetical protein protein_id=ACU79141.1 location=complement(773707..774183) gbkey=CDS	127.7	161.2	155.9	570.1	570.4	559.3	3	3	85.7499	135.367	119.485	1034.47	1019.05	1001.37	MMCAP1_0632	MKKLLSVLAIFSLATTSVLLSLTISSNSNFINTILKVETKKENKTDSKKLDSLIKQKNLGSFNKKPSTSEIIKKINQINKLENQNQIKESDVDINIKKDKIIITLKSDKNDTVTLKYKNTHKLAEIIGGVLAGVVVLSGAGFLSYKVIKKQKTSKSTN
CP001621.576	locus_tag=MMCAP1_0633 protein=putative membrane protein protein_id=ACU79558.1 location=complement(774274..775833) gbkey=CDS	370.5	574	464.2	419.6	439	431.1	3	3	248.789	482.013	355.772	761.384	784.301	771.838	MMCAP1_0633	MKKTVKLTIILLVVAVIYFGYSAWLDGVAIYAIRGVKEDGNSFFSLMTSTSAWVNNWKTILIEKLGKETELGKWVETFNGSTAWTDWVKSIEASGYKLTGFMAPDSLLYTLLSPFKLILVGGVFAMFIPLLKQLLFNTIIGIKSYLKNRDMNVLFNYSKTIEFVENLKAKISEDDFEGVKAAYSSYSSLAFKPVFLTNLMNEIYKTLIKFGDIKVFENGCVSVLEAIQEMYVKEKRRAMNNGRGDEMFYDIKRGFEYSSYSSRYFVKYYEAMSKDSKKLGWKIFSIEISRFSLFLLFALLPSILLSGIISGVLLQVIDINSSNITALITIGSFIMLWAIFAIIFHAIYIFFKKEYKINKHILVKPAITYYSLLLLVFMTLTAGCVGIAQVGNIAEPFTA…
CP001621.577	gene=leuS locus_tag=MMCAP1_0634 protein=leucine--tRNA ligase protein_id=ACU79847.1 location=complement(775900..778314) gbkey=CDS	610	516	549.4	134	147.9	144.3	3	3	409.612	433.308	421.071	243.149	264.233	258.354	MMCAP1_0634	MDFSHKAIEKKWQKYWKENNIYKTTNNSENKAYILDMFPYPSGSGLHVGHIKGYTATDVYSRFKRMQGYDVLHPIGWDAFGLPAEQYALKTGNDPREFTLQNIENFKVQLNKMGFSYDYDKEINTADPNYYKTTQWIFKQLYKKGLAENRDIDVNWCQELGTVLANDEIIEKNGLMVSERGEYPVVKKKMRQWVLKITDYADKLLDGLDNLDWPNSVKELQRNWIGKSEGCEINFKSNDINIPVFTTRADTIFGATYIVLAPENELVLKLTTPEKLDEVKKYIELTANKSEIERKDESRTKTGVFIGSYATNPLTKEQIQIWISDYVLNDYGSGAIMAVPAHDKRDWDFATKFNLPIRFVISTKDESKAFVGEGIHINSEFLNDLDRVQALQVIHNYVE…
CP001621.578	locus_tag=MMCAP1_0636 protein=putative liporotein protein_id=ACU79287.1 location=complement(778601..781390) gbkey=CDS	113.6	139.4	116.2	130.8	129.9	131.4	3	3	76.2818	117.06	89.058	237.343	232.074	235.258	MMCAP1_0636	MKKILAILSSLTLVSTGVFSTVLSCKKTLTPTTKPNTNNNKVLKNNSLDNIKTISAMLLKQAVLADMYGYNFDFLKSYFNNKNLNEQAKRYKLNTEIKDNITLSTDFEDALANYFSTNLVIKKNDNVNLDGIKGTDIDFLTSVLPKTVFGTTSKQISAAISIILENISGAGITGLLDLAKNIDVNSKFSDFVKNLNVSKELITTLLNTIFTNDKFLKELEEEINKFDALTLYKDFELSELSNLALLNILDGINGILDKDYQLVSSDIKKNNGSTLNVKLWNTSKTFINKVAKFDQTSNVSTISSFSNSTSPTILPTNIKRNIKTAASLIRGLELFQYLFSLFDESRKDEFKISDENIFDKSKKNSEFIKNIYKINGSTGGSNNGSNKIESLNGTSNGST…
CP001621.579	gene=rpsI locus_tag=MMCAP1_0637 protein=ribosomal protein S9 protein_id=ACU79582.1 location=complement(781549..781947) gbkey=CDS	5660.6	6499.2	6204	3086.5	3301	3420.2	3	3	3801.06	5457.67	4754.87	5600.6	5897.44	6123.5	MMCAP1_0637	MFKDKVIYRGTGRRKSSIAQVILTPGSGSITVNGKPALEFFPYATLVQDLEQPLVATNTLKDFDIIVKVIGGGFTGQAGATRLGIARALLQASEDYRKLLRDQGLLTRDARIKERKKYGLRGARRAPQYSKR
CP001621.58	gene=serS locus_tag=MMCAP1_0061 protein=serine--tRNA ligase protein_id=ACU79788.1 location=76472..77740 gbkey=CDS	1330.4	1137.3	1063.8	499.1	503.2	490.1	3	3	893.357	955.041	815.318	905.64	898.998	877.471	MMCAP1_0061	MLDINYIEQNLDEVIQRLNKRNQQDYSEDLKYAVEKNFKRKEILVKSEALKSRKNQLSKEIGILIKDNKNKEAEKAKAEVVSLNEQIIKLDDELRIVNEQILEKLSYIPNLPHKDIYFGKSDEDNVEIRKTKHNPLLTHSTPHWEIATKLGLVDFEKGVKLSGSRFLIYTGLGSKLVRAIADILLKRHEKHNYKEIFCPLIVNKSAMLGTGQLPKFSEDMYQVGEQYLIPTSEVPLTNLHANEILTYDMLPLKYTSFTQCFRQEAGSAGRDTKGMIRLHQFNKVELVKIVHPDQSMNELELLVKDAEDVLNMFDLPYRVVELCSGDIGFSSAKTYDLEVWFPEQNKYREISSCSNCTDFQARNIQTRFKDKDGKIKLVHTLNGSGVAVDRLIAAILENY…
CP001621.580	gene=rplM locus_tag=MMCAP1_0638 protein=ribosomal protein L13 protein_id=ACU79507.1 location=complement(781947..782402) gbkey=CDS	5775.4	4859.2	5547.1	1100.5	1225.4	974.2	3	3	3878.15	4080.49	4251.41	1996.91	2189.25	1744.2	MMCAP1_0638	MKQTTMISAKDINKKWYIVDAENKTVGRLATQVALVLRGKHKVDFTPHINNGDHVIIINAEKAIFSGKKESNKFYYHHSMHPGGLKKRSVEVQRELDATKILERAIRLMLPKNVQGSNQYRALHVFKGSQHPFAAQKPEVLEISTKKGDVK
CP001621.581	locus_tag=MMCAP1_0639 protein=efflux ABC transporter, permease protein protein_id=ACU79400.1 location=complement(782532..786677) gbkey=CDS	51.9	72.6	64.2	110.4	104.3	106.5	3	3	34.8506	60.9655	49.2042	200.326	186.338	190.677	MMCAP1_0639	MKTKNKKNKWLGLILKNSLKNSFKYKSQLFGLVLLVMIMSLIMSLISAINSRVLDKYDDLITNSNQHNLVLKLDPYENVSTSLITSNNQIQAQQQFINRLNEKLYSRYNFKFDWSRTESREFKQVKSLNNLQTLKAVSKQYLTDNKVDQLVIVKGRNINSNKEVLIDPIYAKKHNIKINDIIRFQKDVLGDQLLVNSLENKTTTKQQFEDINKITKQGLTDNNGIYQIKYASSFDWYQVVGFANSADFIFPTINAYSPIPNRLNEGIIYVDPLRFGLIKQTDGFYKYDSTSSKLVVSSNNEWESFYSLKTKQKLSDEIVDWMNQYFSQLINKKAQDKWIYKLEDPNYRFNSRTSVIKKTISAYNIYSFIVLLAVISVVLYTTFLITKKQILNSRGQIGT…
CP001621.582	locus_tag=MMCAP1_0640 protein=tRNA pseudouridine synthase A protein_id=ACU79581.1 location=complement(786772..787527) gbkey=CDS	141.7	112.1	108.2	12.9	NaN	NaN	3	1	95.1508	94.1354	82.9267	23.4077	0	0	MMCAP1_0640	MKTGILLSLCYDGSNYHGWINQTNAISIQTTLNKAIKKVIKTDQFKTIGASKTDTNVHALDQKVLLIIYFTPILEKFIKAINKALPSDIKILDAKFVDPNFNIREVEYKIYHYYINDHHFDIFTNRYEYFWKHSKIDIIKLQEIFNLFIGEHEFKLFSGLKENEWNQYQTKRTIDDIKVLRINNKVVIEFKASGFIRYQIRIIIANCLNAYLNHKISTTKLVEMLKGIGKKTPFIIDAKGLVLQKIQFNKN
CP001621.583	locus_tag=MMCAP1_0641 protein=ABC transporter, permease component protein_id=ACU79089.1 location=complement(787530..788540) gbkey=CDS	18.4	47.1	51.8	49.9	51.7	42.9	3	3	12.3555	39.552	39.7006	90.5459	92.3653	76.8078	MMCAP1_0641	MRISFGRYIPKNSLIHKMDPRLKLFMIMVLIVSVFFPIGLTGYLIISGIIIGLFALSQLSFKMLVRLLVPVTFIFAIIVLMNFFFIHPSSNAVGQISSWVENNPNKIFWTKSNGTIVGQLDVDAVSQITNSLGKEIKNLQPIGYFFNWKVFWFSEKALYSALVMGMRIYLMITLTCILTGSTPSLQLTLAIEDLLSPLRLIKAPVYILSMIISIALRMIPTLIDEAGRIMKAQASRGIDIKNGKFKDKVKSLTSLIIPLLVSSFQKAEDLAYAMDARGYDPNATRTRFVQFKFRIIDAIIFVLGISFAIFMMVYGSNPHGIFTNWHISHIDSLVAY
CP001621.584	locus_tag=MMCAP1_0642 protein=cobalt import ATP-binding protein CbiO 1 protein_id=ACU79539.1 location=complement(788554..789465) gbkey=CDS	1254.1	1121.2	1075.5	786.6	809.8	799.5	3	3	842.122	941.522	824.285	1427.32	1446.76	1431.42	MMCAP1_0642	MQKVNKKTNQNLKDIDFSKDIILDNVSYTYAKKTPFEFKALNNTSLTFKKNKVTCVIGTTGSGKSTMIQLTNGLIISETGQIIVGDYAIPANTKKIKEVKRLRKEIGLVFQFPEYQLFQETIEKDIAFGPVNLGENKQEAYNKVPELLKLVQLPEDYVKRSPFELSGGQKRRVALAGIIAMDGNTLVLDEPTGGLDPKGEEDFINLFERLNKEYKKRIIMVTHNMDQVLRIADEVIVMHEGKVIAIGSPFEIFSNMELLTKIEIDPPKLYQLMYKLKNKGIDLLNKKIRTIEDFADELAKVLK
CP001621.585	locus_tag=MMCAP1_0643 protein=cobalt import ATP-binding protein CbiO 2 protein_id=ACU79272.1 location=complement(789453..790679) gbkey=CDS	710.3	567.1	585.9	802.9	841.7	829.5	3	3	476.963	476.219	449.046	1456.9	1503.75	1485.13	MMCAP1_0643	MDNLAIFEEFNSKKISQDDLEATITSLNNYFVKLNDLNNQYINLIRQDNIDKIEKQNIRQQQKQVKAEIKKISATTKLFKQNLKLAESLYKKIKLTNNQNDINKAKQEVEIAKSMLLQLKEVINGQGKSIKLEKLSDIAIEINHLSFKYGPEFPNAIDDVSFTINQGEYVTIIGHNGSGKSTISKILIGVLNAQHGEIKIFGNIVNDHNIEQARKFLGIVFQNPDNQFIGSTVEADIAFGLENKRIDPKKMPDIILDSAKKVGMEWALKKEPLNLSGGQKQRVAIASTLALDPDIMIFDEATSMLDPKGKREIKEIMVQLRETRTKTILSITHDMDEILNADKVIVLDHGKLVRVAKPLEIVEDKDFLRNIQLDVPFVGLVREELEKKGIKIASTQNID…
CP001621.586	gene=rplQ locus_tag=MMCAP1_0644 protein=ribosomal protein L17 protein_id=ACU79830.1 location=complement(790787..791146) gbkey=CDS	8418.2	7492.6	7544.7	1438.2	1602.8	1640.9	3	3	5652.78	6291.87	5782.41	2609.68	2863.5	2937.85	MMCAP1_0644	MSYIQKRGQNTAWRTALMRNLTTELIINESLEVTQTRAKELRRHFDHMITLAKRGDLHSRRQAASWLRDIDADKKETALQKLFNKLAKKYENRNGGYTSILKLDNRKGDNAPMVIIKLI
CP001621.587	gene=rpoA locus_tag=MMCAP1_0645 protein=DNA-directed RNA polymerase, alpha subunit protein_id=ACU79443.1 location=complement(791166..792119) gbkey=CDS	4827.5	4445.7	5104.9	270	312.3	271.7	3	3	3241.64	3733.25	3912.5	489.928	557.943	486.45	MMCAP1_0645	MKQFVRPEFILLKEGQDKNYGKFSVSPLERGFGITLGNAIRRTLLAATPGASVYAIKIAGATHEFTSIPGIIENVTKIILNIKQLVLKIDTSIYSDDEVVQLRIRSDIQGPVYAGDLDIPAGVEILNKDLLIATISEGGVLDLVLYAKNSRGYKTFKDNKNEKNIEPGMITIDSNYSPIIKVAYSVDSAKIGRAIDLEKLELEVTTDGSITAIDAISIASRILVAHLEFFIDLNREISVLEVIGTNQTDDKELDRTVEELDFTQRSLNCLKRAGINTLRELVSKNEDEIGSIRNLGRKSLKEIKDKVASLGLAFRQS
CP001621.588	gene=rpsK locus_tag=MMCAP1_0646 protein=30S ribosomal protein S11 protein_id=ACU79186.1 location=complement(792123..792512) gbkey=CDS	14291.2	10347.6	12339.1	1281.2	1312.3	1420.1	3	3	9596.47	8689.34	9456.93	2324.8	2344.51	2542.54	MMCAP1_0646	MANPKPQAKKKIKKNIPKGIAHIHSTFNNTIVTVSDEKGNVLSWSSAGAIGFKGSKKSTPYAAQLISEAAAKGAMDNGVKTVSVEVKGPGPGRDAAIRALQMAGLEITSIKDTTPIPHNGVRPRKRPRG
CP001621.589	gene=rpsM locus_tag=MMCAP1_0647 protein=30S ribosomal protein S13 protein_id=ACU79760.1 location=complement(792538..792903) gbkey=CDS	4041.2	4194.1	4355.9	1560.9	1503.6	1532.9	3	3	2713.65	3521.97	3338.45	2832.33	2686.27	2744.49	MMCAP1_0647	MARISGVEIPNNKRVVVSLTYIYGIGLPTAQSVLKTLNISEDIRVKDLTEEQIKNISMEISKYKTEGELRREVSLNIKRLMEIGSYRGLRHRKGLPVRGQSSKTNARTVKGPRKTVANKKK
CP001621.59	locus_tag=MMCAP1_0062 protein=conserved hypothetical protein protein_id=ACU79291.1 location=77842..78156 gbkey=CDS	1263.6	544.8	305.1	668.8	693.4	542.3	3	3	848.501	457.493	233.835	1213.57	1238.8	970.93	MMCAP1_0062	MPIIKFSGLDKEQVNQFSKNIQTIAELVKADPKNIFVICENSEIFVTEPDTNPIYVTVEWMSRPDKEQLLADFIVDYFKDYSQKVWVFFTDVNSKLYAHRKKLG
CP001621.590	gene=rpmJ locus_tag=MMCAP1_0648 protein=ribosomal protein L36 protein_id=ACU79604.1 location=complement(792940..793053) gbkey=CDS	3187.1	2529.7	1845.7	7637.1	7837	7437.8	3	3	2140.12	2124.3	1414.58	13857.9	14001.3	13316.6	MMCAP1_0648	MKVRSSVKQICDKCRVIRRKGRVMIICVTPKHKQRQG
CP001621.591	gene=infA locus_tag=MMCAP1_0649 protein=translation initiation factor IF-1 protein_id=ACU79463.1 location=complement(793122..793346) gbkey=CDS	4031.8	3069.8	3420.4	1128.8	1462.2	1260.5	3	3	2707.33	2577.85	2621.46	2048.26	2612.31	2256.79	MMCAP1_0649	MAKETEMEFEGTVVEVLPNAQFKVKLENGVVINAHVSGKIRMHYIRILPGDKVTIVISPYDMTRGRITYRKIGK
CP001621.592	gene=map locus_tag=MMCAP1_0650 protein=methionine aminopeptidase, type I protein_id=ACU79442.1 location=complement(793358..794113) gbkey=CDS	1070	960.3	896.6	222.6	228.7	248	3	3	718.5	806.407	687.172	403.918	408.587	444.017	MMCAP1_0650	MITIKNQEQIQKMKIAGQVLAKGLNLLKSMIKPGVNCLDLDKAFEEFIKQNGCESNFKNYQGFPKTICISINDQLIHGIPKNRILQNGDIVSIDAGCMYQKWHADSAFTMVCGIANDKKNDILIRVTEKALDLAIAELKPGIRVGTIGSIIQNYVESHNFSVPRDYTGHGIGLALHEDPYIPNYGIPNTGVRLQENMVICIEPMVQMGTYKTKLADDNWTVYSADHSMTAHFEHTILITKDGCEVLTKEER
CP001621.593	locus_tag=MMCAP1_0651 protein=adenylate kinase protein_id=ACU79365.1 location=complement(794113..794754) gbkey=CDS	3181.8	2178.4	2380.9	655	625.5	627.8	3	3	2136.56	1829.3	1824.77	1188.53	1117.49	1124.01	MMCAP1_0651	MNIMLLGAPGCGKGTQAEQLVNKLNFIQVSTGDLMRKEISLNTSLGLKCQEYMNAGKYVPDQIVNQIVSQFLKNTNDKLIFDGYPRTLEQAKSLEQMLDLYNKKIDYVFYIDINDQILIKRITNRLVCPLCKASFNLETRKPKQEGLCDFDNTKLVKRSDDSLDKVQIRLQTYKEQTLPLIDYFKTNSKFIEIKADDLSAEQVFNQIKGELKI
CP001621.594	gene=secY locus_tag=MMCAP1_0652 protein=preprotein translocase, SecY subunit protein_id=ACU79088.1 location=complement(794882..796330) gbkey=CDS	76.5	106.1	91.6	51.6	49.7	44.7	3	3	51.3694	89.0969	70.2041	93.6306	88.7921	80.0305	MMCAP1_0652	MVIKKPANKVDKKTTFKSSTKKKNLFKSNFFTKNKDLILRILFTLLALIIIRLGVYITVPGVTLDKRFATDSSRIQFFQLLSTLGGGSIGRFSILALGVSPYITASIIVQLLSTDVIPVLTRWSKSGERGRKKLDKLTKIIMIPFALMQAEATIFTLSSQGLIVPGWDSTNVIANSAFYYVLIPLVMLGGSFFMLWIADQITIKGIGNGISIVIFIGIIISMPTNLKATFEYWVSNSGEEANIFFSGLLNFMIYISVFLLVILSVVIMNEAERKIPIQQTGSGLTDSSEHTPYLPLKLNNAGVIPVIFASAIISTPITISQIIEAVNPDSGFVIFTRDYLSFNTWWGISIFGILIVLFTFLYSQVQINPEKVAENFQKSGTFIPGIKPGKDTTKYLTGI…
CP001621.595	gene=rplO locus_tag=MMCAP1_0653 protein=ribosomal protein L15 protein_id=ACU79314.1 location=complement(796330..796767) gbkey=CDS	11835.9	10683.4	11192.7	1863	1933.9	1941.9	3	3	7947.75	8971.33	8578.31	3380.5	3455.03	3476.76	MMCAP1_0653	MKLNELKYTPGSKTKATIVGRGMASGKGKTATRGHKGQNSRSGGGVRPGFEGGQTPLFRRLPKVGFTSLNQKQYTILNLSDLETLGLEKIDHESLINSKIIKNNASLIKILANGTLTKKVDVKVNKISKAAKDAIEKLGGKVEVI
CP001621.596	locus_tag=MMCAP1_0654 protein=30S ribosomal protein S5 protein_id=ACU79813.1 location=complement(796786..797550) gbkey=CDS	16367.9	14654.8	15846.4	2483	2646.8	2596.7	3	3	10991	12306.3	12145	4505.52	4728.67	4649.11	MMCAP1_0654	MTEEMNVVETSSEMNSNVEKASTQVKETKKFERRTRPQSKSKQVKDEFEEKVVTIRRVTKVTKGGRHFRFAAVVVVGNKKGLVGMGTGKANEVPEAIKKAIKEAKKNLVSVTLRNTTVPHEVLGTFGAGKILIKPAKVGTGIIAGGPARAVIELAGISDVYAKSLGSNNAINMIRATFEGLSSMQTLKRVQELRYGKTFDTQKVKPVEQKVAEVKSVEKKQPKQVVKKVTVKKAENQENTVEVITNAETESKAE
CP001621.597	gene=rplR locus_tag=MMCAP1_0655 protein=ribosomal protein L18 protein_id=ACU79065.1 location=complement(797569..797919) gbkey=CDS	11259.7	9105.1	10027.9	2808.8	2687.9	2961	3	3	7560.83	7645.96	7685.58	5096.7	4802.1	5301.35	MMCAP1_0655	MKFTKAEARKRRHFRVRQKVVGTAERPRLNVFKSNTNFYAQIIDDTKGVTLVSASTLKMDLKSKSNTLAAQKVAEEIAKKALAANITQVVFDRNGYLYHGKIKAFAETARENGLKF
CP001621.598	gene=rplF locus_tag=MMCAP1_0656 protein=ribosomal protein L6 protein_id=ACU79644.1 location=complement(797945..798487) gbkey=CDS	8501.9	7576.9	8202.6	2974.2	3057.2	2863.4	3	3	5708.98	6362.66	6286.64	5396.83	5461.88	5126.61	MMCAP1_0656	MSRIGNRLLQIPNGVEVKIAENNLITITGSKGTLSKQFSPLIKIEVEENKLITKRLNEQKHTKQLHGTTNSLLQGMLTGVSEGFKKELQITGVGYKAAVNGSKLNLSLGYSHPVEFEIPKGVEIQAVKPTELVITGIDKQLVGQVAANIRAYRKPEPYKGKGIKYKNETIIRKEGKAAGK
CP001621.599	gene=rpsH locus_tag=MMCAP1_0657 protein=ribosomal protein S8 protein_id=ACU79739.1 location=complement(798501..798890) gbkey=CDS	1317.5	1314.7	1307.4	1409	1407	1445	3	3	884.695	1104.01	1002.02	2556.7	2513.69	2587.12	MMCAP1_0657	MTTDVIADMLTRIRNANQRYLKTVSVPSSKVKLEIARILKEEGFISNFTVEGDVKKTINIELKYQGKTRVIQGLKKISKPGLRVYAQANEIPQVLNGLGISIVSTSQGIMTGKKARLANAGGEVLAFIW
CP001621.6	gene=gyrB locus_tag=MMCAP1_0006 protein=DNA gyrase, B subunit protein_id=ACU79694.1 location=5515..7419 gbkey=CDS	1809.7	1533	1447.9	73.3	81.1	76.4	3	3	1215.2	1287.33	1109.7	133.006	144.89	136.786	MMCAP1_0006	MSQEYSAESIKVLKGLEAVRTRPGMYIGSTSKTGLHHLVWEILDNSIDEAMAGYADLINVTITKENEVIVQDNGRGIPVGINSDTKKSALSLVFTQLHAGGKFDSETYKISGGLHGVGASVVNALSLYVEVEVYRNNIHYHQLFSEGGTKESELQQLGHTDLRGTKVKFKPDPEIFKETVVFDYEIIKNKVKQLAFLNKGLKITLTDERIEKTVEYLFLNGILDYIKEKNETKNKINPNIFYVDSKYEDIEVEMALQYNSDYQENIITFVNNINTHEGGTHEDGLKQALIRDINRYADTVIKNNKTPSKFSWDDIKEGMMCILSVRHTDPQYEGQTKTKLSNPDAKEAVNIIIGNAFEEFLLKSPEDAKAILDKNVNAQKARIAAQKAREETRRKSALD…
CP001621.60	locus_tag=MMCAP1_0063 protein=tRNA-dihydrouridine synthase B protein_id=ACU79248.1 location=78158..79132 gbkey=CDS	1348.5	883.7	977.9	144.9	160.3	182.7	3	3	905.511	742.082	749.482	262.928	286.386	327.105	MMCAP1_0063	MKIRDIQIDGKVVQGPMAGVSNEAFRIISKQHGASLVYAEMVSVAGMVHDNKKTLNMLNVNEIEHPMSMQIFGNDVDEFIKATQWIEKNVDCDIIDLNLGCPAPKVAIRSQSGSALLKTPDLIYEIVKNVVKNTTKPVTAKIRLGWDKNSVNAVEVAKLIEKAGASAIAVHARTRNDFYTGHADWEKIKEVKQAVSIPVIGNGDVIDAKSAKKMLDETGCDAVMVSRACQGNPWIFDQINHYLKTGKELEKPSFEEWKTTVLQHLDLLVKLKTEQHAIKEFRKHLTWYLDVLNNKALTKILKEKANKIETIKDVEEIIKEYKEE
CP001621.600	gene=rpsN locus_tag=MMCAP1_0658 protein=ribosomal protein S14p/S29e protein_id=ACU79642.1 location=complement(798910..799095) gbkey=CDS	303.7	365.5	441.3	3510	3673	3506.8	3	3	203.933	306.927	338.221	6369.06	6562.04	6278.55	MMCAP1_0658	MAKKSLKVKQAKHQKFNVRNYTRCNHCGRPHAVLKKFGICRLCFRKFAYEGQIPGIKKASW
CP001621.601	locus_tag=MMCAP1_0659 protein=50S ribosomal protein L5 (BL6) protein_id=ACU79679.1 location=complement(799114..799656) gbkey=CDS	2824	3324.4	3464.1	2434.3	2462.1	2514.8	3	3	1896.3	2791.65	2654.96	4417.15	4398.69	4502.48	MMCAP1_0659	MKSRLEIKYKNQIVPELFKELNYKSIMQVPKIQKIVINMGIGDATTDPKKLDAAISELEKLSGQKPIVTKAKKSLAVFKLREGMAIGAKVTLRGKKMYDFLDKLINVALPRVRDFRGVSKTSFDGFGNFTTGIKEQIIFPEVDYDKVIRLRGMDITIVTSAKTNKEAFALLQKIGMPFEK
CP001621.602	gene=rplX locus_tag=MMCAP1_0660 protein=ribosomal protein L24 protein_id=ACU79668.1 location=complement(799675..800001) gbkey=CDS	13466.1	12216.9	13737.5	1861.8	2064.5	1806.9	3	3	9042.42	10259.1	10528.7	3378.32	3688.36	3235.06	MMCAP1_0660	MAKSRILKGDVVKVIAGSHKGQIGPITSITKDKQWVSVQGITVKKHVKPTNEDSEGGIKDIPAKLHISNVALQDPKNKDQVTKVGFEIIDGKKVRIARKSKTQIKTAK
CP001621.603	gene=rplN locus_tag=MMCAP1_0661 protein=ribosomal protein L14 protein_id=ACU79608.1 location=complement(800015..800383) gbkey=CDS	294.5	465.5	436.1	950.6	928	939.5	3	3	197.755	390.901	334.236	1724.91	1657.93	1682.07	MMCAP1_0661	MIQTLSKLKVADNSGAKEVRVIRNLGGSVRKFSGIGDIIICSVISATPGAVIKKGQVVKAVIVRTTRELRREDGTYIKFSENAAVLIKEDKTPRGTRIFGPIAREIKEAGFAKIASLAPEVL
CP001621.604	gene=rpsQ locus_tag=MMCAP1_0662 protein=30S ribosomal protein S17 protein_id=ACU79497.1 location=complement(800399..800656) gbkey=CDS	25599.5	25649.5	24211.4	1544.5	1630.7	1333.1	3	3	17189.9	21539	18556.1	2802.57	2913.35	2386.77	MMCAP1_0662	MQRNSRRVLIGKVVSDKMDKTITVLVETYKNHPIYKKRVKYSKKYKAHDENQVAQMGDKVEIMETRPLSKTKNFRLVRVIEKATL
CP001621.605	locus_tag=MMCAP1_0663 protein=50S ribosomal protein L29 protein_id=ACU79438.1 location=complement(800656..801072) gbkey=CDS	1177.1	1668.7	1023.5	1806.1	1830.5	1888.5	3	3	790.417	1401.28	784.431	3277.25	3270.3	3381.16	MMCAP1_0663	MAKSKMLDLRNLSVDELIKTNESKRAELFALKFQAAVGSLEQTHRIKEIKKEIARIELALSEKRLSGENTNKVIKADYNKAVAEAEKAGKEVRAKQRKFLEEQYGQQSQTELNEADIQKAMQAAEQETVEPDTKGETK
CP001621.606	gene=rplP locus_tag=MMCAP1_0664 protein=ribosomal protein L16 protein_id=ACU79435.1 location=complement(801072..801485) gbkey=CDS	12760.8	9792.2	10975.7	2695.7	2785.4	2613.9	3	3	8568.81	8222.95	8412	4891.47	4976.29	4679.91	MMCAP1_0664	MLQPKRTKYRKPHRVSYEGKAKGAKEINFGEFGLMALDGAWIDNHQIEAARIAMTRYMKRDGKIWMRIFPHMAMTKKPAEVRMGSGKGNPEKWVAVVKKGTIMFEVAQVNEQVAREALRLAMHKLPIRCKFVKRGEN
CP001621.607	gene=rpsC locus_tag=MMCAP1_0665 protein=ribosomal protein S3 protein_id=ACU79145.1 location=complement(801488..802189) gbkey=CDS	12352.8	11283.9	11095.9	3434.8	3398	3688.7	3	3	8294.84	9475.59	8504.12	6232.61	6070.74	6604.22	MMCAP1_0665	MGQKVSPNVLRLGIVRDWENRWYAEKDQYVKWLDQDIKIRTALFKLLKDAAVSKIDIERTTKDLTLFIKTARPAIVLGQEGKNIEKIVLAVRKTVKNKKLIVNVRVIEIKSPDADATLVARWIGEQISNRASFRTVQKLAIKKALKAGAKGIKTAVSGRLGGVEMARTEGYLEGSVPLSTLRNNIDYALYEAPTTYGQIGVKVWINHGEVFKKERMNNSQIMAKPRTNKGGKR
CP001621.608	gene=rplV locus_tag=MMCAP1_0666 protein=ribosomal protein L22 protein_id=ACU79241.1 location=complement(802207..802542) gbkey=CDS	1686.9	2544.2	2317.1	2982.7	2956.7	3000.1	3	3	1132.74	2136.48	1775.87	5412.25	5282.33	5371.36	MMCAP1_0666	MEAKAKLSMIRISPRKMRLVADTIRNKAVSVAVATLKNLNKDAAEPILKLLNSAVANAVNNNGMEADKLYVKTIFVNEGPTLKRFRPRAHGRAYEIFKRTSHVVIVVSDEK
CP001621.609	gene=rpsS locus_tag=MMCAP1_0667 protein=ribosomal protein S19 protein_id=ACU79192.1 location=complement(802566..802832) gbkey=CDS	24468.5	17910.5	21410.8	4915.5	5029.9	4727.7	3	3	16430.5	15040.2	16409.7	8919.41	8986.23	8464.44	MMCAP1_0667	MARSLKKGPFVDESLFKKVTAAKDGEVIKTWSRRSTIFPEFIGKTFGVYNGKEFIPVYITEDMVGNKLGEFAPTRKFGGHGDDKGKKK
CP001621.61	gene=lysS locus_tag=MMCAP1_0064 protein=lysine--tRNA ligase protein_id=ACU79703.1 location=79135..80637 gbkey=CDS	624	550.2	615.6	244.8	261.8	258.9	3	3	419.013	462.027	471.808	444.201	467.722	463.533	MMCAP1_0064	MLDDRKFSEQELVRRNKYKTLVEQNKDPYKITNWKRNTTLLKLNEKYKDYSKEDLLNLNQELVVVAGRIKLYREAGKKAAFVNIDDQDSSIQLYVRLDEIGDQSFEDFRNFDLGDIIGVKGIMMRTDHGELSIRCKEVVLLSKALRPLPDKHAGIQDIEEKYRRRYVDLIMNHDVRKTFQARTKIIRTLQNFLDNKGYMEVETPILHSLKGGASAKPFITHYNVLNTDVYLRIATELHLKRLIVGGFEGVYEIGRIFRNEGMSTRHNPEFTSIELYVAYEDMFFLMDLTEEIFRVCNAAVNSSSIIEYNNVKIDLSKPFKRLHMVDGIKQVTGVDFWQEMTVQQALELAKKHKVHVEKHQESVGHIINLFYEEFVESTIVEPTFVYGHPKEISPLAKSN…
CP001621.610	gene=rplB locus_tag=MMCAP1_0668 protein=ribosomal protein L2 protein_id=ACU79530.1 location=complement(802854..803702) gbkey=CDS	23044.4	20805.1	23538.5	4408.1	4290.1	4254.3	3	3	15474.2	17471	18040.4	7998.71	7664.53	7616.87	MMCAP1_0668	MAIKKYKSTTNGRRNMTTIDYSAVLTTKNNPEKSLVVSKNSKAGRNNRGLITTRHKGGGHKQKYRIIDFKRNKRDIFGTISTIEYDPNRNAFICLINYVDGEKRYILFAKGMQVGMKVVASENADIKVGNAAPLKNIPEGTLLHNVELKPGKGGQIARSAGSSVQLLGKDDDGKYVTLRLSSGEVRKVLAECYATIGEVGNEEYNLVNWGKAGRNRWRGIRPTVRGSVMNPNDHPHGGGEGRAPIGRKSPVTPWGKKALGVKTRNTKKTSEKLIVRKRSNKK
CP001621.611	gene=rplW locus_tag=MMCAP1_0669 protein=ribosomal protein L23 protein_id=ACU79815.1 location=complement(803757..804041) gbkey=CDS	9927.1	6457.4	7761.4	2918	3189.8	2829.3	3	3	6666	5422.57	5948.49	5294.85	5698.78	5065.56	MMCAP1_0669	MHITEVLKKPVLTEKSFAGHKDNVYTFLVDKKANKVQIKKTFEEIFEVKVESVRTVNYDAKEKRLGKYVGKKPSYKKAIITLKEGQKLDVLSDL
CP001621.612	gene=rplD locus_tag=MMCAP1_0670 protein=ribosomal protein L4/L1 family protein_id=ACU79486.1 location=complement(804041..804667) gbkey=CDS	9612.9	7205.1	8182	1982.7	1990.6	2020.6	3	3	6455.01	6050.44	6270.85	3597.7	3556.33	3617.67	MMCAP1_0670	MKLQVLDIKGNEVKEIALNDYVWGIEPHQQAIYDTVISQQAALRQGTKKVKTRAEVSGGGRKPWKQKGTGRARQGSIRAPQWKGGGVTFGPTPDINYKKSVNKKVRALAFRSVLSLKVKENNLVIVDKFEFAKPSTKEMVVVMKNLKIDDQKTLIVTKEKEELVVKSSNNITGVKTISANQLNVFDLLNATKLLITEEAAIAVEEVYA
CP001621.613	gene=rplC locus_tag=MMCAP1_0671 protein=50S ribosomal protein L3 protein_id=ACU79313.1 location=complement(804680..805351) gbkey=CDS	9642.5	8022.1	8467.3	1638.7	1847.8	1735.2	3	3	6474.89	6736.51	6489.51	2973.5	3301.21	3106.69	MMCAP1_0671	MKGILGRKVEMTQVFTSAGQLVPVTVVEVLPNTVLQVKTIDSDGYVAVQLGTTDKRVNLVNKPELGHFKKANSNPKRFVKEIRNMQGYELGQVINVSDIFVSGEYVDVTGISKGKGFAGGIKRHNYARGPMAHGSGYHRGIGSMGAIINRIFKSKKMPGHMGNAKRTIQNLEIIAIDQPNNIMLIKGSIPGPKNSFVQIKQNIKGMSSKQAVELLNRNASVEA
CP001621.614	gene=rpsJ locus_tag=MMCAP1_0672 protein=ribosomal protein S10 protein_id=ACU79349.1 location=complement(805427..805735) gbkey=CDS	20582.6	16284.2	19881.2	1387.5	1409.6	1289.3	3	3	13821.1	13674.6	15237.4	2517.68	2518.34	2308.35	MMCAP1_0672	MAESKMRIKLKGYDHAIVDQSIVKIIQAAEGTGAKVRGPIPLPTEKQVITILRAVHKYKDSREQFEMRTHKRLLEILNPTAATMDILKRVQLPSGVDIEIKL
CP001621.615	gene=dhaK locus_tag=MMCAP1_0673 protein=dihydroxyacetone kinase, DhaK subunit protein_id=ACU79044.1 location=complement(805987..806985) gbkey=CDS	2901.1	1946.7	2084.9	402.6	435.5	407.9	3	3	1948.07	1634.73	1597.91	730.537	778.048	730.301	MMCAP1_0673	MKKLINSPETLVNEMLEGLVKAYPNKLKRVEGFDVIIRNDDIKKDKVALVSGGGSGHEPAHAGYVGYGMLDAAVAGAVFTSPTPDQVYQAIKSSNANKGVLLIIKNYTGDILNFEMAQDMASMEGIEVDSVVVNDDVAVEDSLYTAGRRGVAGTVFVHKIAGAKAEMGASLQEVKNTALKVIKNVRTMGMAISPCIVPVAGKSNFSLNEDEMEIGIGIHGEPGVYRDKLKPVDQIVDTLTDKILNDIQINKDEQVAVMINGMGATPEMELLVINNHLNDILTNKGIKIYKTFVGNFMTSIEMGGFSISILKLDDELKQLLDHKADTPGLKVF
CP001621.618	locus_tag=MMCAP1_0676 protein=transcription regulator, LacI family protein_id=ACU79870.1 location=complement(810342..811328) gbkey=CDS	50	61.2	45	4.3	4.3	6.2	3	3	33.5747	51.3924	34.4889	7.80255	7.68222	11.1004	MMCAP1_0676	MKNKKISISTIAKECNVGVGTVSRYFNNGYVSDQKKELIKKVVEKYNFSPNFAAHSIKRKIQEVYFLIPDLTKSNTFVIKKILKYLQLEFSETMVFVIQTTYNQETYLKYLKKVVARKPAALVLFAISDDLKIKDYLKKITIPFISYGKDWGKFYFINNDQEMMISLLETMNNQNEFDHQKQILYIGEKPETNKSTGYDRFYSLNNWFKNKNIKFDYLFFEHNSETSIYNLIKELNLNNKIIICGTHTCHKILLKYIVNQKFKNITLTDIYQKNSLLLPIFEKQYCIAIDYQNLVQRINESINKILNNKPLDEENEKYLNYEIKVLDR
CP001621.619	locus_tag=MMCAP1_0677 protein=putative membrane protein protein_id=ACU79751.1 location=811853..812764 gbkey=CDS	13.9	178.8	14.9	11.5	13.1	17.9	3	3	9.33378	150.146	11.4197	20.8673	23.404	32.048	MMCAP1_0677	MDQNKANNLILVGAIISIIGSIISVFLIGYMFYINILFGWLFSIFGAVFKIFFNFIGLGLAITSVILSILCLVPKFKNNKKLVLTAGVFGVAFGFIVGGVLLIIGANNIFSSSVISTTNTTTQIISTEPMNKEIINPEIKDENINITKSEQNLDSFKITKKQFKYKKLILAGLILSLIGAVIGFSINAFYTFENLTELHRYIIPRRADPRDRVIYIHPGLLINVASFSTFNSIGLFMLLIMSIIGLLTIKKNKDILLIFIAAIAIPLFNPIFINSFGGILILVGVIIKKITEQKEEIIQKNTK
CP001621.62	gene=trxA locus_tag=MMCAP1_0065 protein=thioredoxin protein_id=ACU79236.1 location=complement(80727..81035) gbkey=CDS	29347.7	14302.8	21504.7	7038.6	6857.8	7299.1	3	3	19706.8	12010.7	16481.6	12771.9	12251.9	13068.3	MMCAP1_0065	MADIIKITSKEQFDKEIKEGKVLVDFNATWCGPCKMLAPILHDFAKKVGGVKFLDVDVDLNRQVAEEFRIMSIPTLITFENGNQVNKHIGFATPDQLKKLID
CP001621.620	locus_tag=MMCAP1_0682 protein=putative liporotein protein_id=ACU79240.1 location=complement(813437..814600) gbkey=CDS	28.6	37.3	28	1318.7	1147	1181.4	3	3	19.2048	31.3225	21.4598	2392.84	2049.19	2115.17	MMCAP1_0682	MLFKVLSFILVSSSALLVVSCSNKNTNNSIKKEIIKKELTAEQKQTINDIFVSQQDAFATFHTYKDVLDQLKVFLSKKNLNEVILFDENQKDKHLVLDNNANKNSVKIRVFGNVFEFKPKTVKEYVETKYSDDTKTKVTQLGYKKETIQNVDYYVLNRLDENTKEVPIDLPSKINSLKESFKSNKNENIQNLEKWDTKNIISFKEMFYEAKKFNQDISSWNVSNVKNMSNMFSAAENFNSTLSNWDVSKVVDMESIFDGASSFNQNLNNWNTKSVKNLTFAFRDAKKFNQPLDKWNVLSVTTMEGMFSDAISFNQDISLWNTSNVDTMNGMFSGAKSFNQNLNNWNVQKVGNAQNFAKDIKNNLPKEKLPKFRWQYSSDDYIYGPKK
CP001621.621	locus_tag=MMCAP1_0683 protein=conserved hypothetical protein protein_id=ACU79290.1 location=complement(814713..815468) gbkey=CDS	273.1	406.1	365.9	1346.4	1368.6	1440.2	3	3	183.385	341.02	280.433	2443.11	2445.09	2578.52	MMCAP1_0683	MKTSFKNNRPKRHYIYNDIFKKANLIIQISSAIFMLLATIGFMFGIVGITLGTVNNTTNIKLNTISGISLLVISSYVFLMCAISLCLSVISNYHKTTIYLEILAIFSIVSIVCMIGGFLIIFSSNKYKDEQEKNTNNQLENQNDNNQKTEDKQQVENQTNIQSKDNFISNPNQNINPNQQIASDHYHANISRINNNQINNQRLEQAKKNEKYQQVKRTYQLVKEHKLSEDKLQSIFNSDPEFKQMYDELKK
CP001621.622	locus_tag=MMCAP1_0684 protein=bifunctional protein FolD protein_id=ACU79390.1 location=complement(815458..816324) gbkey=CDS	132	110.7	123.8	18.7	18.7	16.2	3	3	88.6373	92.9597	94.8828	33.932	33.4087	29.0044	MMCAP1_0684	MVILDGKLVSKQIKETLKQQIDTYLNKNYKKPKLVVILIGNDPASELYVSNKIKACNLVGIESVLLRFDQNITSEILSDQINQLNNDNSVDAILLQLPLPKHLNEQEFLQAIDPLKDVDGFHYINQGKMLEGYDTIYPCTPIGIINLLKAYNIDVRSKDITIIGTSNIVGKPLAIMLSNMGATISMCNKNTKSLKKYTKRSDIVISATGKQALIKKDMIKKNAIVIDVGIIKDPITNKIVGDVDFENVKELCSYISPVPGGVGPMTVAMLLENTFELYKLHIKENYEN
CP001621.624	locus_tag=MMCAP1_0686 protein=K+, Na+ uptake protein integral membrane subunit protein_id=ACU79542.1 location=818013..818741 gbkey=CDS	1560.8	1229.6	1406.3	403.4	397.1	356.8	3	3	1048.07	1032.55	1077.82	731.988	709.444	638.812	MMCAP1_0686	MAKKQNFAIIGVSNFTLSVIETLVQKRQSVTVFDIDERRLNLYLSEFDTVEGIVIDTTNKVALAKKGIQSYDWVIVGIENELESSLVTVLNLLDLKCTNITVKAKDDNYRRVLLALGLTENQIIVPNKIAGEITATRVIFNIDFDIEVHSIDDEFISSTLEVKNPDLFNKNIQQVGLSTNKDFNIIQIRRKGKILLPDDYTELKEGDHIVVFARTTIINSLAEKIQGMIDEETDPNLLTEEQ
CP001621.625	locus_tag=MMCAP1_0687 protein=glutamyl-tRNA(Gln) amidotransferase, B subunit protein_id=ACU79600.1 location=complement(818768..820207) gbkey=CDS	1191.4	891.8	1024.9	267.2	239.7	233.6	3	3	800.019	748.884	785.504	484.847	428.239	418.236	MMCAP1_0687	MQNFEIIIGVENHVELKTNSKMFSPSKVSYGQTPNTLANEIDLAYPGTLPSVNKKGVELAILACNALNMQIDTLLTFDRKNYFYPDLTKGFQITQQFNPIGTNGSLEITLENGNKKVIEIERLHIEEDTAKQVHKDNLTYLDYNRSGVGLIEIVTKPVLRSAEEACLYVEKLREILLFLNVSDVKMNEGSLRTDLNISLRPYGSDKFSNKVEIKNLNSISNIKKAVEFEINRQKEILLKNQIVEQQTRRFDDQTSSTILMRSKIDSIDYRYFREPNIFPIQLDQKWVDQIISNSPELADQKRIRYVNELGLTSEDANIILTSLEMTNFFEKTIKSTTNYNKVAKMLISEIQAKLNLENKTIDQIKLSPENLASVINLIDKNIISSKQTKVIMPIILDSN…
CP001621.626	locus_tag=MMCAP1_0688 protein=glutamyl-tRNA(Gln) amidotransferase subunit A protein_id=ACU79683.1 location=complement(820209..821666) gbkey=CDS	890.9	781.3	795.2	330.8	313.2	317.2	3	3	598.235	656.092	609.457	600.252	559.551	567.912	MMCAP1_0688	MQDYRKKSIFEIHKDLVDKKYTVLDLTKEVLKNLKYELDSNAINYLAEIHALKQAKKIEENFDSNNLLSGIPYICKDNFSTKDIPTTASSKILENYIPNYSAALVDSLEKNQSILVGKSALDELGMGGTGLLSCNGKITNPWDKNRIVGGSSSGSAYLVAKGLVPFATGTDTGDSIRKPASYNGIVGFKPTYGVISRYGLLPYAPSLDTAGFFTKNVDDMAVLCDASYDDDNRDFSSTTADHVDFLKQIDDFSNIKTFGYISSVIESLDQEHKTHYYNLFETLKNKGYQVKALDFRQDLLDAVLPVYLMIANSESVSTNSCLDGIKYGKRVDGNDYSEIMINSRTQGFGEIVRRRFAIGSLVLKGENQKKYLVQAKKVRTLINRDFNNLFEQVDVLLLP…
CP001621.627	gene=gatC locus_tag=MMCAP1_0689 protein=glutamyl-tRNA(Gln) amidotransferase, C subunit protein_id=ACU79820.1 location=complement(821666..821962) gbkey=CDS	1292.1	1223.4	1018.5	128.2	147.4	141.3	3	3	867.639	1027.34	780.599	232.625	263.339	252.982	MMCAP1_0689	MSNRFNKEFWKELAHDFMFELNDEELENLMSVEDKLFDDFKKITSIDTTDVEPTFYTVNQIHSYLRDDEPIQTNCQKEILENAPTKHDDYITIARVVK
CP001621.628	gene=ligA locus_tag=MMCAP1_0690 protein=DNA ligase, NAD-dependent protein_id=ACU79239.1 location=complement(821964..823970) gbkey=CDS	596.4	331.6	474.7	70.1	67.1	87.4	3	3	400.48	278.459	363.82	127.2	119.878	156.48	MMCAP1_0690	MSKDKALLRINQLKEQLNLWSKQYYVDDNPSVDDIEYDLALKELISLETLYPELITSDSPSQKVGGMVSEKFLKITHKTPMLSLGNVFSFDEFLDFNTQISKVSNTLDNQYVAELKIDGLSISLVYENGSLVSAATRGNGVVGEDVTINVKTIKSIPLKINKKERVEVRGEIYLSKAEFEKINQKRLLNNEDLFINPRNAAAGTLRQLDSKIVASRNLDAFLYYYISDDSNNLTQYQSILKLNELGFKTNKETMLCKNLDEIKAYIDKYTNLKNDLDYQIDGIVFKINDKNLQNSLGFTSKIPKWAIAYKFPAEIKQTKLLDIFATVGRTGKITYNAKLEPVFLMGATISAATLNNAEYIKSKDLRINSIVKIKKAGDVIPEVIEAIKDETFYNLEVFQ…
CP001621.629	locus_tag=MMCAP1_0691 protein=putative membrane protein protein_id=ACU79052.1 location=complement(823974..825995) gbkey=CDS	9.9	13.2	15.3	128.4	128.8	134.8	3	3	6.6478	11.0846	11.7262	232.988	230.109	241.345	MMCAP1_0691	MQVNVESTTANMPINDSKKTTSAKSGVFSALLGVVSSITNMIIQFLLIYWVLQSFGTEISGFIRISMSLSIIGGTAEGALALSTVLMLTEPLSKKDWITVNEIFSTAKRNYNNKIVSGFILVFLLSILYPLQIAISPLITSGESIKWGIDFTTPLSKTTSTLKFWELSAVFLILGTKQTLLAGLFGVHENIMQADQKNASKKLVVLFCDVLFYGIFFVLLNSYIYWNDKHTPVLLFLPFLFYPVIRGLLITSYVKKKYPAIKFYNDFNNLNLIRRSTKIYWSSIGQSILVNSDLIIIFLALGSIGLKVSSLISLYMVVAINLRIIMTSLVTSFKEYFSSVIIKKGRLDWETYSNYEFYSYIVGVFSFLITSIMTPYIVTGLFSKIILNDVDTTGLTKKT…
CP001621.63	locus_tag=MMCAP1_0066 protein=putative hydrolase of the HAD family protein_id=ACU79484.1 location=complement(81046..81888) gbkey=CDS	646.8	639.4	565.9	309.9	301	278.7	3	3	434.323	536.933	433.717	562.328	537.755	498.982	MMCAP1_0066	MDKKNIIIFSDLDGTLLYDDYIFSPKTIEVVEKLYKKGIYLVPITARTIKDLKQKASLLQIDKFKGIIVASNGAQIYDYKTDKIIFDKTLPKEFIKEMFNRYHNKFFAKMIFYSPNCCYVFAEGKNSKYWAHQVMGLKYISVDSPDQIDEPITHFYIVTNSKATPEENLNEYKYLMNNYADSYKVDSYNNRVFDISVKGVDKGCGVAEVMKYLNLDEKTTHSYGFGDGPNDFSLLKACTTGIAMKNGIIELKEIADDITDYSNDKDGVARYICDKILNID
CP001621.630	locus_tag=MMCAP1_0692 protein=23S rRNA pseudouridine synthase protein_id=ACU79374.1 location=complement(825998..826906) gbkey=CDS	164.9	155.9	138.9	7.4	3.9	5.3	3	3	110.73	130.916	106.456	13.4276	6.96759	9.48908	MMCAP1_0692	MTKFVVNKNDQNQTLFKFLKKTFKTTPISVIYKWIRNKSIKINSKRISDKNYLLKINDVIEVYDSNKPIIRDQFNYISNVNLDIVYEDNNILIVNKPNNLEMHSTYNLCLDDMVKSYLVDKKEYDIYLENSFVISHVHRLDKLTSGLVIYAKNKISSTILTNAFKSKDQINKYYYALTSSDWSLDEFLQVNGYINYDSNIKKADFSLDKKNNYKYCQTEFKLINKNLILVKLITGKKHQIRSVLSFYNHPILNDFRYNGKKINDLKMIYLSAFKIEFKNLEKPLDYLNNKVFIKNPEWISKE
CP001621.632	locus_tag=MMCAP1_0694 protein=phosphocarrier, HPr family protein_id=ACU79238.1 location=complement(827933..828202) gbkey=CDS	2541.3	1749.5	2265.5	1274.1	1243.2	1374.4	3	3	1706.47	1469.13	1736.32	2311.91	2221.05	2460.72	MMCAP1_0694	MAKFSAIITDKVGLHARPASVLAKEASKFSSHITIMAGEKQGNLKSIMNVMAMAIKTGTEVTIQADGTDEEQAIKAIKQTMIDTALIQG
CP001621.633	locus_tag=MMCAP1_0695 protein=UvrD/REP helicase domain protein protein_id=ACU79580.1 location=complement(828267..830435) gbkey=CDS	424.6	357.6	361	52.6	55.3	42.9	3	3	285.117	300.293	276.678	95.4452	98.7969	76.8078	MMCAP1_0695	MSVDHLLDLLNPQQLAAVINTDKPVRIIAGAGSGKTRVITTKIAYLIEKKHIDPTRILAVTFTNKAAKEMKERVLQITKNQKKSPFISTFHAWCSKVLRIDGKHVGLKDKFLIIDSDDQKRIIKNALKESNIELSENDKKTFDKKILYKIKEWKEELVDPDEAILNANSTYDRNSAIIYKLYQETLLKNNSIDFDDLQIYVYLLFKNHQEILNKWRNAYDYVLVDEFQDTNDIQFSLIKFLTINTNHLTVVGDPDQTIYSWRGAKLDIILNFNKTYSNAISIVLNQNYRSTKQILDISNSFIKNNKFREHKEIFTNNKSGKKVVLKECNSKTSEASYVSFKIKELIKQGYHYKDIFILYRMNAWSQEFEKELINKKIPFQLIGGIKFRERKVIKDAMAF…
CP001621.634	locus_tag=MMCAP1_0696 protein=RDD family protein protein_id=ACU79843.1 location=complement(830452..831207) gbkey=CDS	5.6	18.5	9.2	33.1	38.7	41.7	3	3	3.76037	15.5353	7.05107	60.0615	69.1399	74.6594	MMCAP1_0696	MNNSLITSKQTDFKLDNNYKLASLWKVFFARLFDLLICSIPLIIMSLFLKTKTGDIISLVIKYLVSFLWTFFYFVILSFLLKGNSLSKKLFKIELKSLKTNKISFFQILIRETWFIFIPLFIGFIFTLIFAFLLPTSYIKTQSWRISLSLIVYQIGLVIVLFWFLGLMISIRLQTNHQSFIDIKLGLIVIEKQKNIKQEPIVSNQILTRNDKHISLNEQPGNFDLEFIDELKQELNNQNQDNKQNTNNKNK
CP001621.635	locus_tag=MMCAP1_0697 protein=glycosyltransferase protein_id=ACU79556.1 location=complement(831207..832163) gbkey=CDS	429.3	454.7	438.1	190.6	202.3	181.7	3	3	288.273	381.832	335.769	345.853	361.421	325.314	MMCAP1_0697	MLVSFIIASQAHLDRLKTTVDSIKHQTNNSHQTIIISDSKYTDNTKRQYIKEIFDNSENIVLSENNIPQDTATDWNCAMQLANGKYVVFVKEGDFLYPNFVEEIQKISDQHNADLIEFNQNYNGLVDDQISYNLLEANKLYDLNKDYEVFAYIQRLIYTKAFKLDIIRKNNLTFRRKVRFDHLFTYKFLSYSDTCYISDDYLSLHRISVMKYSAFDLLRQWPHIINYFRQINKYKLLSDQLTYAHYYQTCYKFLDLIEKYNNPVLYKKALNITENKLKNKINRFVKKNKVFLENKDTKFNQRMNDFERFIYSELKKIK
CP001621.636	locus_tag=MMCAP1_0698 protein=lipoprotein, putative protein_id=ACU79592.1 location=complement(832314..833540) gbkey=CDS	93.1	155	121.8	926.7	933.6	937.4	3	3	62.5162	130.16	93.35	1681.54	1667.93	1678.31	MMCAP1_0698	MKHLLKIISSLTVLSTSVLAVSCTNKSEQNNKDQLPNNKEDKNNKEQQDQPSDQPKEEPKIQISEEEKQEVIDALQKVFKEQEDAFGSFHTHQEVLDQLKVYLNDNKIKHLEHLKLTNEKEKNTNLKVDTNNKKINNIGLSFFDKKITFIPKTVLKDKVQTKYSNSGKDITQIGYELESTIKSIKLTQVNKNTTKVPLHLPLKINSLNESFSNLESTKIDNLDKWNTQNIKFLTKTFENAKNFDQSLASWDVSNVFDMSEAFAGASKFDQNLNSWDVSRVKVMKGVFWDAENFNGDISKWNTKNVEDMDVMFSGAKKFNQDLSSWDVSRVQSMKGMFSSTNAFNSNISKWNTSNVATMEQMFQEAKGFNQDLSGWNVEKVTHAENFNKDGNKDFVEEKF…
CP001621.637	locus_tag=MMCAP1_0699 protein=peptide methionine sulfoxide reductase MsrA/msrB protein_id=ACU79315.1 location=complement(833629..834558) gbkey=CDS	461.3	410.6	401.3	389.3	323.3	278.8	3	3	309.761	344.799	307.564	706.403	577.595	499.161	MMCAP1_0699	MNKVIYLAGGCFWGVEAYFSKLKGVIDAENGYANGISEKTKYYSLSKTLHAETVKITYDPNQISLEELLVHYFRIIHPDSLNKQGNDVGTQYRTGVYYTDINDKKVIELVFLEYKKQYDEFYVELEELKNYMTAEDYHQDYLDKNPTGYCHVNLNVDFNLTDKEKELVQLIRKELSLDELSLNVLKYSATEKPHTSEFNDEHRKGIYVEKITKEVLFASNTKFNAGCGWPSFATPINSKAVEYKADYSHNMHRVEVRSKTGDNHLGHVFNDGPKEMGGLRYCINGAALEFIPYEEMDEKGYSEYKKFLD
CP001621.638	locus_tag=MMCAP1_0700 protein=putative liporotein protein_id=ACU79425.1 location=complement(834672..836858) gbkey=CDS	423.2	551.9	480.5	1309.2	1298.9	1259.9	3	3	284.177	463.455	368.265	2375.61	2320.57	2255.72	MMCAP1_0700	MFKSKKLIIPLLTTLAVVPSLVVVSCKNPQSTQSLSEKIYLNYNLQTEKDKQEFENYNQINMLSEINQYFTKHDHNKDLVKFTTDGASGDTVEFNNIMKNNYASKYIKFDQDKFKEIIKKEFNLSDSFLNRLEFEVDYNNISRDYGNNFDIIFPIRVKLPLVSHNNFKYQQGLFIEQTFNFRIKNVKASGSEKIDVSKIKDIYNELLKLKEKNNFTASVKTVTEDTKKLVDEWGIHELNSTQLSSIFDIKTDEFDKLVKDKEVEHKVTVTDVDLSDPSLAINEGLLKLRLGVKIKGKETETGVNVWVKFNFDQKETFWKELKISESIKVNTVKFSETNTDFTKLMNDNLIIKSKSKFIKNIKLSSIDKTTDYRNSGVLLEVLINESKDNVIKLHKKLGV…
CP001621.639	locus_tag=MMCAP1_0701 protein=putative liporotein protein_id=ACU79837.1 location=complement(837106..839454) gbkey=CDS	323.6	350.1	290.6	834.2	862.4	898	3	3	217.296	293.995	222.722	1513.7	1540.73	1607.77	MMCAP1_0701	MINKKYKKSALVVLCSLPILSTSIVIGCKTTQNQQGIYKIVDFEKENQINILSEINQYFEKHDFNEQLVQFVNKDSHNYITLDSLMKNNYAAKYVKFDKDKFKQIIKKEFNLSDAYLNKLEIEVDYTNIDRDYSNNFDIVFPIRIKRQLENHKKASYQPGLFTEQIIKFRLKNVKSSPSEAFFVEELKDVFNKLKELKYDNFTARLKTNISDELKKQIDQWNINELDSTQLSNIFEINTSEFDQLKTNNPSFVFKSTIFGVDFSDKNLALNEGYLKVRFAVKEGFDSSKKAKKLIEINKEINELVTKKQNLEKINNSNSNKTEIDKLIEQIKQKTLELKTIQKKALPAEAGITKLIKFKFDWNDQFWKNIKLNEVIKIDTIKYGISNTDFLSLTKDNLI…
CP001621.640	locus_tag=MMCAP1_0702 protein=transmembrane protein protein_id=ACU79487.1 location=complement(839463..840365) gbkey=CDS	701.8	18.2	317.7	NaN	8	0.6	3	2	471.255	15.2833	243.492	0	14.2925	1.07424	MMCAP1_0702	MIQKNTPGEALRTFFNPTVFGFEILAVFLLVFLVLVFRLIAILLKKQHNKLFLSTSFTIATALAFFLPYGFASIGAKTSIAPFLNPLIVFFKAVFIGFGKSGQESNQLVGSILINGIWYILFAQFIGVILSVLVFYLFFYSIKKVNNKKIEYQFLNTLTLREFFKSSSDLSILGFSIKEFVFITLLIIVLPFISAIDTAIYKFDQFGIILMELLFIWTILFISSFFEFFSFHLAFPFIDIIFKTIDFILLKKENQISIKSYLFDLLKFVLVIIFSIIIPIIIGFISIAIKMKTGVVISVA
CP001621.641	locus_tag=MMCAP1_0703 protein=conserved hypothetical protein protein_id=ACU79404.1 location=complement(840492..842327) gbkey=CDS	19.1	19.6	21.7	0.9	0.6	NaN	3	2	12.8256	16.459	16.6313	1.63309	1.07194	0	MMCAP1_0703	MKNHLITVSPRSVKEMFSYLQIVEIPLYQRQYCWSKENIHSLLNDLLDRDLDDRQHFFGTITETTAPIDTDNPNGLKHRIIDGQQRLTTCLLLLHFFNSKIIRNKESNILQQSIFKEKGIKEFNLEKRSDDQESWSISEDIKKIINYYTSNELDNSEINFSDKKIKENYETIKNFFDSKKFNVNDYKRLLDIFLNKFIFSSLIYPISDPFEEMTIFENLNSKGVPLDDLDLIKNIIMLADQNKNPKDNLRQFDKYIWNLVSNGDWKNKDKEKVIRDFFEEFLKWYLKDNYKKYGSYEIYKNFKYYIKSSKEKNWSLTNILQELKKYLILYLTITKPIKANHIGNNLWIRVIDQKRVYIGLLFALFNKFSNFDTSSEEWKENITIINYMKVFSIHIIRLM…
CP001621.642	locus_tag=MMCAP1_0704 protein=conserved hypothetical protein protein_id=ACU79494.1 location=complement(842330..842896) gbkey=CDS	45.9	33.9	18.2	NaN	NaN	NaN	3	0	30.8216	28.4673	13.9488	0	0	0	MMCAP1_0704	MEFKEIIKGAIFHTVGTNAKTYLKRFKDKYSKFNSFYTSPNSKINNNINVMNENDKIIDVFTSDATYDQFCLVLTAFGYIKNVNGNWKIINKELSTKQIADNIFSKSLNKNVSIYRQSKIITLLVNLNIINESNYQDFKLKGKRTNQVKIKNLKAEVSPWEKDVCLDAELITYCLKKIENYEFIKKEK
CP001621.646	locus_tag=MMCAP1_0708 protein=alkylphosphonate ABC transporter, substrate-bindin protein_id=ACU79794.1 location=complement(846480..847943) gbkey=CDS	109.8	119.9	111.4	700.8	690.5	709.7	3	3	73.7301	100.685	85.3792	1271.63	1233.62	1270.64	MMCAP1_0708	MYTNKLKVALGTMLSAVSIASVGSFVVACQTKEDWDTTITINNSWVNDGFFSKLDYDTGAVTPGDKSKAFIELLTKKFNELKNKDEATKKFKDVKFDIKVDFDKKTYFSKLEKNDSENDVYIANYSYYLSNVWNNKTKSLNKDLPFKLVSQAATLQFNWQSGDNTFYKDGKSTDDLRKLAEENNKKWLEFGEYPDWHKSDKAVNGKKLDFDGSKYTNFYKDVDLTYVYRGAVLIAGNEADREKIVKAWDDKNWDSFVKNGIVYEKTSSAGGYKYQVALFARHFGKTISEIKEDLEGKKYEQYIVKGQKVSAQLGKKQANSQLVPRIGFDDEGSYNWTKSEEGSEKYKPTDFKSTEKAMNGGKAMMTAAKPAAAKPAAAPAAPAPAAKPEANGMKDKNGA…
CP001621.647	locus_tag=MMCAP1_0710 protein=hydrolase of the HAD family protein_id=ACU79468.1 location=complement(848166..849029) gbkey=CDS	351.4	395.8	383.7	519.2	547	495.2	3	3	235.963	332.371	294.075	942.113	977.249	886.602	MMCAP1_0710	MYKIIAIDIDGTVYTRKNGIHELTKLAIKKAKDKGIKIVIATGRTITTTRFIAKQLDLLNTSIPFIGQNGGQVFSYEKNGSVKIRYTKNFTAQQVDQIFSIIKQHKAHAFCYTLNENIAYKNKGISIFFWWMKKRAQRVVKIYKPNKALESQITKYICFGKKENMRQMRKKIEDLGFSAFSFSYVTNAKENIEINPIGVNKGYGLEYVAKELNVKPEEILFFGDGENDLEAIKFAGKGVAMKNTKLDIVKNAADDITSLTADQGGVGEYIFKHVLKEEIPIEFQIDK
CP001621.648	locus_tag=MMCAP1_0711 protein=aminotransferase protein_id=ACU79648.1 location=849161..850351 gbkey=CDS	NaN	1.1	2	7.6	6.5	6.4	2	3	0	0.923719	1.53284	13.7906	11.6127	11.4585	MMCAP1_0711	MNKFKTEFDKPFNRSKTHERRWCKDNIKQFYLLDDYDNFLNYSIADTNFKTPKIIVDTIKKIANQQSYSYTCSIESSISAIQTWYKQLHNIDLDLDQIILGHGTISALIQAVQALTNTNDNILIQSPVYKPFYNVIQTNNRNVIDNPLVYKDHNYEIDFIDFENKIKKHNVKMFILCSPHNPSGVVWKAQDLLKIVEICNKYNVVIISDEVHGDIVLKDKFYSILEFETTNNNFIVVSSPNKMFNLAGLKGSYLISKNKDILDKIKQQYLINGFGLSNSFYQQALISAYTNKEVLDWVKEFKEYVYNNYLYLKENLLNKYKQLDYIDLKATYLVWIKFNHITVNQFKENLKHQNLIINLASDFYTTETDWFRINIACPRSELIQLIEKLKICLKLN
CP001621.649	locus_tag=MMCAP1_0712 protein=endoribonuclease L-PSP, putative protein_id=ACU79511.1 location=850361..850762 gbkey=CDS	1103.5	762.5	872.3	29	15.9	31.4	3	3	740.995	640.305	668.548	52.6219	28.4063	56.2183	MMCAP1_0712	MKIINTENAPKAIGPYSQAVKICNGTLYLSGQLGLDPKTMLLENNIELQTKRSLNNIYEILKQAGYDKTDVVKTLVLLKDINDFSLVNSIYEEFFEDHKPARSAFQAAALPKDALIEIEVIAYKKETNCCLDK
CP001621.65	locus_tag=MMCAP1_0073 protein=phosphonate ABC transporter, permease protein PhnE, putative protein_id=ACU79042.1 location=complement(89563..92295) gbkey=CDS	52.7	94.5	64.7	224.4	231.9	243.8	3	3	35.3878	79.3559	49.5874	407.184	414.304	436.498	MMCAP1_0073	MFNKKIIKDRNLFKIGNHYTKPPKRVFTICFTIGIIIFVVLGFALADERWSEFFDNFDKLVSLFKDFFKWDLNNWNQKHGLPNTFLETSFYNLWQTIKLSFIGTFLGIILCLPFSVLASRSIVSNRYINNFSRGFLSLFRTIPSFAMAMIIAGYFLTGYGSSVIGIIFFSFSVAGKLFYEKIEQIDTKVFTTMQATGANKFQSFRKAVVPQISTNLLSISLYTLETNIRYFSVIAIVTGLDSYGELIKSTLDSSEYSKAGFLLTIFAVTILLIELFIFLIRNYIIEEKDYLLEKKLINKIQKPYKNIDKLSNVQFYINYILTKEINDKIAKTTDPNELQSLKLEKKKLISEFKKQYSLDVKKDKEKYKKLFKENKKNLFVKVDFVDHLVRIDKITQTKL…
CP001621.650	locus_tag=MMCAP1_0713 protein=conserved hypothetical protein protein_id=ACU79623.1 location=complement(850798..852129) gbkey=CDS	36.4	31.3	30.8	71.7	70.2	72.1	3	3	24.4424	26.284	23.6057	130.103	125.417	129.087	MMCAP1_0713	MKKLLTIVGMGTSIFMFSSSLILLNNYNNSNKYNNIYFSELKSREHEIDKNGKLTKVGYTVLQNGVVEIKHLNYKVKTIAAELPKEVTSLKNAFVQNSNQINWEVDWNTENITDMSYAFYNTTWFNNSSILKWNTSKVRNMEGMFGLAKSFNQDLSSWDVSNVTNFKNMFLGAEEYNNNNKSLKWESKVKKATNMQGMFNKAYSFNQNISDWDISNVTDMSRMFENASSFNNGEKPLDWGHKLKNIKNMSNMFNGAIKFNHDLSSWLMNDTVKNDNFGLIKERQPKWKVEDTKPIIKPEKPTEESSKPDSIPNSSPLPADSPDNSENTIAPKKPEHSKINNETIEKNESLKEDKIKNPKIDNSPYKIPAKPNTIIKSNSPSAGVIAGAILGSFTILGIG…
CP001621.651	locus_tag=MMCAP1_0714 protein=conserved hypothetical protein protein_id=ACU79674.1 location=complement(852159..853415) gbkey=CDS	18	13.8	12.6	19.9	73.4	21.3	3	3	12.0869	11.5885	9.65689	36.1095	131.134	38.1354	MMCAP1_0714	MKKLLTILTSCSAIFLVFASTTLVKNSNNKNIVINYNSKNISKEHTIQGDRLTEIGYKTENGQVRIKEIPHTVNVIAAQLPTEITSLKGAFQTRLNDITWTVDWDTSRITNMNSMFYNTTWFNNPAILKWDTSKVTDMGEMFAYSKGFNHDLSNWDVSNVTNMEQMFANSTTFNNGNKPLEWGPKLKKIKNMKKMFKDAKAFKQNLNSWLMKTEVNNNDFGLDQNYQPRWLEKTEAAKPVEESTPQPGQSGNTESLSNDSEDTPELITLPKSDSSVNESDSIDNINVTPPTKPEISTEEILSPKADEALENPHTDNNLNEITKDKQKDDSEKRNILEDNTYKIPSLESKPNTILKQSSPSAAVITGAVLGTFTVLGIGVGAGYYYRKNLKNFYLNSAEK…
CP001621.652	locus_tag=MMCAP1_0715 protein=conserved hypothetical protein protein_id=ACU79569.1 location=complement(853602..854870) gbkey=CDS	47.7	64.1	52.5	109.8	109.9	99.1	3	3	32.0303	53.8276	40.2371	199.237	196.343	177.428	MMCAP1_0715	MKKLLTLLTSCSFGFLITTSIILVNKNNGENNIISYNAQTNTKQHVVTGSGLNRKITKIGYYKKNGKTIISQIPPTVSTIAADLPPEITSLEYAFTGNNQYVKWETKWNTSNIEDMSYVFYNTNYINDPSIAEWDVSKVKTMEGMFGKSRSFNQDLSKWDVSNVKNFKGMFSEATDFNNKEKHLNWDDKLKNATNMESMFKNASSFTHDLSGWKLTNYANNKDFGLDDKKQPKWVSKPVEAPTPNIQPRSEDESNITIPGPTVTTPIIKPDNTPSLPDPMINAPNNENESSIINQPIEEPKLPIEKSESPESKNEITEVEDTLKIDSENSIDRTNNNTNKFPLIKPNTVISKSKSNNALVITGAVLGTFIILGIGAGVGYYYRKNLKNFYLKSTDKIKP…
CP001621.653	locus_tag=MMCAP1_0716 protein=conserved hypothetical protein protein_id=ACU79467.1 location=855012..856154 gbkey=CDS	74.1	85.8	67.5	114.5	129.1	140.3	3	3	49.7578	72.0501	51.7334	207.766	230.645	251.192	MMCAP1_0716	MKNKNNESFKKRLGKKIFKAAKRPFKFIYWLAGNLTVFKSNKKLGYISKIDDINKLNKIMKYYYKRDELVLCDDNKIQNVSFVTSDNIKIKAIKFITNKDSKKWIISSHWFAGHKYLGLIHTKAFIELGYNILSFDYRNHGESDQTEVISMGLFESRDLISAINYLITSETVEVLGLFGMSMGAYICNYVAINNKELLDKVNVKFIISDSTYGSIESLLYKNWEQRLKFFINRKLARKIINKTIDLQTLATNHNQEELNLFDMYENKKLVPAKAASLFIHGCNDQITSHTDSLRLFINRTIYNDNDELVLYNSCNHCFSFKEHYYQTIYKILMFENKIIKDDNATKIALNKMNITPEVINNNFNEIKEVSTFSFSKNKNN
CP001621.654	gene=nagB locus_tag=MMCAP1_0726 protein=glucosamine-6-phosphate deaminase protein_id=ACU79562.1 location=857319..858053 gbkey=CDS	884.1	621.6	697.4	188.5	168.5	146	3	3	593.669	521.985	534.501	342.042	301.036	261.397	MMCAP1_0726	MKLIVLENEEQVANKAAQIISEQIKNKPNSVLGLATGSTPINTYKKLIQMYQEKQISFKDVISFNLDEYKDIDKNNKQSYYYFMNEQLFNFIDINKNNCYIPNASFYDNPKVYDELIKKANGIDLQLLGLGVNGHIGFNEPDSSFDSLTQIVDLTNSTIKANSRFFDSIDQVPTQAISMGLQSIMNAKKILLLATGVNKSEAIYRLIQGQITKKWPCTILQKHNDVTIIIDKNAASKLTNLKAN
CP001621.655	gene=tpiA locus_tag=MMCAP1_0727 protein=triose-phosphate isomerase protein_id=ACU79344.1 location=858151..858897 gbkey=CDS	3269.6	2579.1	2796.7	883.8	949	941	3	3	2195.52	2165.79	2143.45	1603.7	1695.45	1684.76	MMCAP1_0727	MKKKVIFGNWKMNGTNESLTDFLNQVDNKIDSSKIIAGLAVPYVMLQTGLKLAKNVKIAAQNVHYKDKGAYTGEISTTMLKEIGVEYVIIGHSERREMFNETDLDVNKKAKVLLENNITPIICCGETLQTKESGKTIEFVNNQINIMFEGIKKEDAIKAIIAYEPIWAIGTGKTATSSDAEEVCKQIRNNLAKIYDKNTAEQIIIQYGGSVKPSNIQEYLKMPNIDGALVGGASLLASDYLGLVNYNE
CP001621.656	locus_tag=MMCAP1_0728 protein=HAD-superfamily hydrolase subfamily IIB, protein protein_id=ACU79399.1 location=858890..859726 gbkey=CDS	425.6	266.2	307	65.9	61.2	68.1	3	3	285.788	223.54	235.291	119.579	109.338	121.926	MMCAP1_0728	MNKPEIKLLILDMDGTSYYKMGPIIEKNIEPLKRIINKGVKVVFVTGRPVLAKLNSLKHHGLLVDHQLIAGYNAACIYDLSKDQILLSNPISTDQAKKVFDLVTSDKYKNSDIKIWGYVDDLKTVITNKWTQNPSDYHDETVFFDGQVLEYKDIKDDFNFKFFKLLGFNANKEFYDILVNELDFNIATNDNKLAEINKKNVNKKLAVEWFSNYFNIDLKNIAAIGDGMNDWEMINHVGYKVAIKNSVEPIKKIANIYIDKTAEQGAVEEFIKHYILGE
CP001621.657	gene=gpmI locus_tag=MMCAP1_0729 protein=2,3-bisphosphoglycerate-independent phosphoglycerate mutase protein_id=ACU79243.1 location=859729..861324 gbkey=CDS	1266.8	988.9	1142	315.1	318.9	297.3	3	3	850.65	830.423	875.252	571.764	569.735	532.284	MMCAP1_0729	MKVKRPVLLAILDGWGISEPDKGNAVDNANMVFVEYLKKTYPWLKAHASGKWVGLPDNQMGNSEVGHIHLGAGRINLESLAKLNHETKTNNIAKNEEIVKSFEYVKNNNSALHLMGLFSNGGVHSHFDHMIAIYKAAIDYGITNIKFDLITDGRDTKPKLAYDFVKDLLELIKQNNNIGVISSISGRYYAMDRDKRFDRSRIAYNAITNRNNVRSFTNILDYIQQEYMINHDDEMIIPAFNQDDLNGNLKANDAIIMTNFRPDRAIQISSILTNKNYIAWQSEAFSDAEFIGDKIRFVSMMKYSDSITSPHIAYPPKPLTNTLGQYLSKLGLKQLRIAETEKIAHVTFFFDGGNDYFKNGLAKNDEITLANAYIDLIPSAKVATYDLKPQMSAVEITDK…
CP001621.659	locus_tag=MMCAP1_0731 protein=conserved hypothetical protein protein_id=ACU79466.1 location=862025..863038 gbkey=CDS	81	61.5	49	8.1	12.3	9	3	3	54.3911	51.6443	37.5546	14.6978	21.9747	16.1135	MMCAP1_0731	MNKFYVKTNSELRALIISTANTKRIPNAVVEKDYWVSFLLDYIFSESKWSNSFTFKGGTSLSKCFNLIERFSEDIDLILDWKLFGYESNELYIERTKKGQSKFNNELNEKVMVFLKDQLLKELNEKLKEYNLEFSIDPEDPNSILCDYPKIFQSDYLSKKIKLEIGCLGKWTPAEDVKIKPLISEVYPDVFKQSAIIRTISPERTFWEKTLILHSVCNKSEEKPLNTRYARHYYDLYCLYNSVYKTKALDDINLLLDATQFKKKFYWSKSANYDDVLENKNLKLIPDDFRIEQVKKDYVDMKNMFYGHIPSIEQIFETLKRLEVEINDKLKQIKNLQ
CP001621.66	gene=phnC locus_tag=MMCAP1_0074 protein=phosphonate ABC transporter, ATP-binding protein protein_id=ACU79681.1 location=complement(92299..93051) gbkey=CDS	697.2	705.2	802.7	1956.8	1988.9	1938.5	3	3	468.166	592.188	615.205	3550.71	3553.29	3470.68	MMCAP1_0074	MILFNNVNKVWPNGKQVLKNINLEINKGELVAVIGLSGAGKTTLLKTINKINDISSGEIVIDFDKTKEHYEVTKTRGKKLQKLRQKIGLMSQEYNNIANKTVLQNVLNARVSSQKGINKILGFFKREDKMIALNSLDKLNLLDYAYIRADNLSGGQQQRVALARTLAQQPFLIIADEPVSALDPILANQVMKDFKNINKKDGITVIINIHHVDLAKKYATRVIGLNNGEIVFDDVPSKLDAQAMKKIYGE
CP001621.660	gene=deoC locus_tag=MMCAP1_0732 protein=deoxyribose-phosphate aldolase protein_id=ACU79471.1 location=complement(863090..863758) gbkey=CDS	2293.3	1711.9	1849	425.1	411.7	413.2	3	3	1539.94	1437.56	1417.11	771.364	735.528	739.79	MMCAP1_0732	MEIKLNKYIDHTLLKPEATKQDIINLCNQAIQYDFATVCVNTCWTSLCKELLKNSNVGITNVVGFPLGACLTEVKVFETKKAIENGCDEIDMVLNIGALKDKDYDLVLNDMKEVKKAANDHVVKVILENCLLTEQEIIKACELAVKAGIDFVKTSTGFNKSGANIKDVKLMSEVVKNKAKVKAAGGVRTYDDAIAMINAGASRLGTSGSVEIVLKQENKSNY
CP001621.661	locus_tag=MMCAP1_0733 protein=phosphoglucomutase or phosphomannomutase protein_id=ACU79641.1 location=complement(863770..865446) gbkey=CDS	3130.4	2221.1	2645.3	329.7	342.4	353.2	3	3	2102.05	1865.16	2027.41	598.256	611.719	632.367	MMCAP1_0733	MSFNKLNQTYLDWINHPNLDQELKELLNKADDNELNAAFNLELKFGTAGIRGILGAGPGRFNVYTIKKVTIAYAKLLQTKYSNDLNKGVVIGHDNRHNSKKFAKLVADILTSFNIKAYLFKNNDLQPTPVVSFATKALNCIGGIVITASHNPAEYNGYKIYDPYGCQLMPHDTDVIANYMNEITNILDWTFISNNNLLEIVDQTVIDKYFEMIKNLEFYKDQDKSNLKIIYSAVNGTGSLYTPIVLKQSGYEVIEVKEHAFEDETFKNVINPNPEFDPAWKIPLEYAKKYDADIIILNDPDADRFGMAIKHNNEFIRLNGNQTGAILIDWKLSNLKRLNKLPKNPALYSSFVTSDLGDRIASETYNANVVKTLTGFKWMGQEMLKEPLNGLNFVFAYEE…
CP001621.662	locus_tag=MMCAP1_0734 protein=pyrimidine-nucleoside phosphorylase protein_id=ACU79538.1 location=865608..866921 gbkey=CDS	5121.9	3680.9	4133.5	1283.8	1289.9	1307	3	3	3439.33	3091.02	3168	2329.52	2304.49	2340.04	MMCAP1_0734	MFTFADIIEKKKHNIELTEQEISWLINSYTKGEITDYQMASFCMATYFTDMTAKETAYLTKAYIESGDRYDLSKVSGFKADKHSTGGVGDKTSLVYAPLVASYGIKVCKLSGRGLGKTGGTIDKLESFPGWKCEVTNDEFVDVINKTNMSIIAQSDNIVPADKKIYALRDVTGTIDSMPLIVASIMSKKMIVENDGLILDVKTGNGAFMTTIEDAKDLANRMIEVGKQYNRKVAVVLTNMEKPLGRAMGNALEVKEAWETLNGNGPSDFNELIATLVGITLLQAKVFTDLNEAKQDVLKKLKSKEAAHYLKDFVIAQGGDWSVLENYDKHFSCKNKLEIKATNSGYIRYKRAEEIGMILIEIGAGRFKKTDKIDHGAGIYFDKQYGDYVNAGDTIMTLY…
CP001621.667	gene=mmyCIIM locus_tag=MMCAP1_0742 protein=CCTTC-recognizing Type II restriction modification system (MmyCII) adenine/cytosine DNA methyltransferase subunit protein_id=ACU79094.1 location=complement(870357..872861) gbkey=CDS	179.6	148.7	159.9	5.6	9.2	4.7	3	3	120.6	124.87	122.551	10.1615	16.4364	8.41484	MMCAP1_0742	MINNKPTYISLFSSAGVGCYGFKLENFECIATNELLERRLNIQKLNNKCKYDSGYIKGDITLKETKDLIYNEINLWKQLGNDKVDVIIATPPCQGMSVANHKKRVDEINRNSLIVQSVELIKKIQPRFFIFENVSAFWKTGCVYNDQIISIGEMIKNHLSNDYVIQYRVLNFKNYGSNSSRTRTLVIGVNKNDASYISTFELFPSFQEEKTIKEVIGDLKELEWAEYDPDDFYHSFRTYPAHMKEWIKDLKESQSAFDNILDSKKPHKIVDGKIVINKSKNGDKYKRQSFSKVAPCIHTRSDQLASQNTIHPKQNRVFSIRELMKLMTIPSDFKWLDLSLEQLNKLTNEQKQKLSKKEELNIRQSIGEAVPTEIFRKIAFNIKKYLLQKKFTDKEVEYL…
CP001621.668	locus_tag=MMCAP1_0743 protein=PTS system, fructose specific IIB subunit family protein_id=ACU79284.1 location=complement(872996..875032) gbkey=CDS	112.8	175.6	133.9	68.3	68.5	103.2	3	3	75.7446	147.459	102.624	123.934	122.379	184.768	MMCAP1_0743	MHIKDLFNQNTSFFKQEFKTKTQIIDFLVSKLFEQKIISKKTVVLNAIKTREKLESTAIGDGVAIPHALNEAVLKPTVCFMSLKNPIKWNNDDNQLVDLIFMIVTNDQNGNDHMDAIAGLSSKFLDSNVLNKLREIENFIQLVEIFNDKKELKEEQINKNEFFDVVGITACPTGIAHTYLASDKLTEYAKSLNLSSKIETQGRRGIENQLTDEDIENAKVIILAHDKAIEGMSRFNNCKVIDTSTKDAIYNGKELISNFDKHPKLKEIKNIKADDSNIGELSLKKFKDFKGNLLGGVSRMLPFVVAGGIILGIAFLLDFITGNGNAKGDFGTVNKVSGWFAAAGKTAMMMMVPILGGYIAYAIVGPQGLMPGVVAGLLADNTGGFAYGTIGSWSGLWKR…
CP001621.669	gene=pfkB locus_tag=MMCAP1_0744 protein=1-phosphofructokinase protein_id=ACU79373.1 location=complement(875035..875970) gbkey=CDS	19.9	18	15.5	29.8	33	22.6	3	3	13.3627	15.1154	11.8795	54.0735	58.9565	40.4629	MMCAP1_0744	MIYTITLNPAIDCVIETNQIDFNNTNYYSNSYSLIGGKGINVAIILNNLKNDVISTGFLGKNNSDQFFDKFIELNLKNHFFLYDGVTRTNFKIKNLNTFDEIELNGVGCDLKSSYLNKLLKYLKDNLNKNDIVIASGSVNKSFNDNVYQIIGDLVNQKEALFILDTSKKYLLEGLKTKPFLIKPNISELFAVFNEPISYEFDQIYKKIKQLQSLGARNILLSMASKGSYYFSESNDIYKIGVGQGKLVNSTGAGDSMLAGFIHGLNQQLDIIKTLKYAASCGSSTAFSKWLATKKEINRQLKNIEVKKIER
CP001621.67	locus_tag=MMCAP1_0075 protein=phosphonate ABC transporter, phosphonate-binding protein, putative protein_id=ACU79203.1 location=complement(93065..94435) gbkey=CDS	5080.8	6405.4	4958	14814.4	14889.9	14366.8	3	3	3411.73	5378.9	3799.91	26881.4	26601.7	25722.2	MMCAP1_0075	MKKLISLMGISLLAASATVVTVACGKRDNELRVVFVPSQNQTEVESTTASLERLLTESLKEKASKRGAKFNKKVKVTTSQNYEIAGQSLANGNEDIGFLPINTYSAYRGEKQNDGTYSKLGVLLTAGRSGVTPETTLKDFKNGDKFDNEKATTQINDETSFNLIKNYKESVEKAKPSADKDGYSKGIYDAANPANYYRSYVFANIPILKSINIDNNSNNEWKGKNFYDAIESLLKDGNKNGNVKKYKDLLKMLFQNPKVKIGIGKSKTSSSGFLYPVLWLKDFVGLSETEITKMLTEKDTSRRFVKALSFTDSATTIGSKDAKAESSKYAITFGFSDIRFRDRQTDGKDESKIKEERQKEKELFENSLVIGASQSIYNDGISYSKSSKSVFKDKQLLDD…
CP001621.670	locus_tag=MMCAP1_0745 protein=transcriptional regulator of the fructose operon, DeoR family protein_id=ACU79090.1 location=complement(875970..876668) gbkey=CDS	283.7	189.8	230.4	7.4	13.2	24.2	3	3	190.503	159.384	176.583	13.4276	23.5826	43.3275	MMCAP1_0745	MIKEQRYKEILKKLEINELLSLDFLSTDLNIPLTTLRRDLKELEQRHKVIRTHGGVQLNKSNLIVEDYLDNKINLNIQAKQQIAIKALKKIKPKTCIFLDSGSTTYYLAKILDPNLDLKIVTNSILNVQELSKNNHQNIYLLGGKYQVVTSSILGYQAVNDLKNYFFDLSFIGINAVDDQNNIYTTSDDHAQLKIQVIKNSNKSYGLVDQSKKHSKSFYKFATNLELELIED
CP001621.671	locus_tag=MMCAP1_0746 protein=conserved hypothetical protein protein_id=ACU79144.1 location=876821..877801 gbkey=CDS	132.4	103.5	93.4	16.4	26.6	26.5	3	3	88.9059	86.9136	71.5836	29.7586	47.5225	47.4454	MMCAP1_0746	MFYYATHSVLIQINKLDYNYLIGDQVFEQIPSYILNSLYTSANWNRALKYYCLKGDLVGYYMLNFDIYLDFINKQVNLLTKNSFFTNIINQNKFKTEFLQKVLDHKHRHRLVLNTNFDIDNDFIIKTNPTIFSDILRIPSINRFFINQQIDLNKYKFKDVFIISDKFEFVITNKNQRIYKIPKDQLNIDNKPIFIDLMNKKTYLLTVLNWSHQIVLELEYEDINNINDLQQQLIKIFKNNFTTDLNWHLYNLTLNEIHLVNAIKEVFENNSFILSINLLEQTFKKLLINYFFIIFRSRTLIDILKTYIRTEDDNLVFNTLLTRYNK
CP001621.672	locus_tag=MMCAP1_0747 protein=purine nucleoside phosphorylase protein_id=ACU79828.1 location=878004..878657 gbkey=CDS	1931.1	1492	1400	1663	1648	1674.1	3	3	1296.72	1252.9	1072.99	3017.59	2944.25	2997.3	MMCAP1_0747	MHIDKNADIANIVLIAGDPKRTKWAAENLLTDYKLVSEVRNAFVYTGYYKNHKVSFATSGMGQPSIAIYVHELFNNHNVNTIIRVGTCGTYNNNIKIGTVIEAKNAFSEVNIFEPNKTGWQINQPSLDLNIGLKANVHCSDVFYRLSKLDIKEHNLDVVDMESFALFYLANHFNKKAATILTVSDNLNDHSNDLTAKQREIATLKMYQDVLEKLFAN
CP001621.673	locus_tag=MMCAP1_0748 protein=IS1296 transposase EH protein_id=ACU79117.1 location=complement(878705..879169) gbkey=CDS	77	61.2	76.5	NaN	NaN	NaN	3	0	51.7051	51.3924	58.6311	0	0	0	MMCAP1_0748	MLPKDLDFKLQIIEEHKKGASVKALSDKYNIGIWTIRDWIHQYKMFAEQGISKSVVHTKYDPEFKLHVINHKKEYNLSYPETIKLFSIKNSSTVALWEKQFKEKGIQGLSNQIGRPKNSSTSYKQLFLQLEEKIADLEHQIDELKQQLNIKDTK
CP001621.674	locus_tag=MMCAP1_0749 protein=lysophospholipase protein_id=ACU79627.1 location=complement(879224..880129) gbkey=CDS	234.2	275.5	288.2	403.8	391.1	421.1	3	3	157.264	231.35	220.882	732.714	698.724	753.934	MMCAP1_0749	MKSEILISKDNKKLVLYKWDQVTRPLAVIQLVHGSCEHIKRYEDFIKQMNQNNVIVIGIDQRGHGQTSVLNNELGYFNKTKGWECLIQDQLLVNQYIKTNYSDLPIYMFGHSMGSFIARSYVIKYSNTIKGLILSGTNQTNSFTLLSALLLTKLTSLFLKEKQPNKIIWNISYKQLNKKFKTNNSNGVEWLTRNTNIQNQFLNDKLCGFVFSSSAFKDMFKGMLFNLKTKNIKKMDHDLRILLLTGSDDPVSHYSKDVIKLNNKLEKLGYDSKLIIYKDSRHEILNELDKDLVIRDILKFM
CP001621.675	locus_tag=MMCAP1_0750 protein=viral A-type inclusion protein, putative protein_id=ACU79748.1 location=complement(880232..883285) gbkey=CDS	74.5	100.5	87.5	619.4	550.9	646	3	3	50.0264	84.3943	67.0618	1123.93	984.217	1156.59	MMCAP1_0750	MKKLLAVLIGLTLFTTSGVSYVVYDNITSISSNQQKTRANLLSEIDKIDKDIKDKLSRSEKLMHDRIGKEKSIKDIKEQVEKIKKQVLEKQEQIKANKTKRDAVIKQLQPIAKQLKELKKSELTQKDQIKKLETTISDAQKQIESNEKEIVVKQKEYDELVAKLKELEIYNSTKKEQLNQREIQIANWTAEYEAISSQVKEKQDELNKQKERLALLNRIQKEYDQSVELKDKLTEDINKNKKELEEYKKHEKEISEKISKLEKQLEEELRKEPSLKDSFRKKQDEWNKLKEDRNKLKETIKRQKASYNETILKLNSELNDLVSQKDKLEDRIKDRNEAETKLNEQIKNLKTNIETIKNNTQEKETSIKEISAELKKLEGKKESTIKTIKEISLKIPALQ…
CP001621.676	locus_tag=MMCAP1_0751 protein=viral A-type inclusion protein, putative protein_id=ACU79449.1 location=complement(883310..886351) gbkey=CDS	166.4	163.5	135.9	543.5	571.5	566.1	3	3	111.737	137.298	104.156	986.206	1021.02	1013.54	MMCAP1_0751	MKKLLALLAVTSILTSSGLTYVIHENVTRKANRVDERKTFEQELKDLSIELDNYKKNLYSTDKKFKNLTAEDILNDGTIRDLNKELAYINKQIEANNQEIAAKDEQIKKLTQEISDSKKAIEQINKDLPNNKKKADQLELEKKQWEVKLTRSNKLLDSRKQEVQALKNKLEQDQIKKFDLNRKYKEALEKLKDLEKKIAEGKASIPKIEKDIQRATRLADSREKEVKTLKEQKEKLKKEVIKLYTEQEKTNAELKRLKADKQKSLELETKVNALEISNRKLETQIKEVEEQISILNRNNKGLSKEFEHYSKEPIAKIKELNEKIAPKKQEVNKLRKKAAKLREKLSPLRSEKVYLNLQKNKLDNSYKKLVKQHSDLKTRLDEIKSLISQLESKEKEHKR…
CP001621.678	locus_tag=MMCAP1_0753 protein=DNA-damage-inducible protein J protein_id=ACU79458.1 location=887501..887773 gbkey=CDS	147.4	180.7	160.5	165.4	156.2	162	3	3	98.9784	151.742	123.01	300.126	279.061	290.044	MMCAP1_0753	MKKVNVNIKMDPEIKKQASLLFKEFGMTMSSAINLFVKTAVEQNDIPFEYNREITNKETLEAFKEGERLLADKNAKRYSSFKEILDSLDK
CP001621.679	gene=mmyCIIIM2 locus_tag=MMCAP1_0755 protein=GCATC--recognizing Type II restriction modification system (MmyCIII) adenine DNA methyltransferase subunit 2 protein_id=ACU79643.1 location=complement(888710..889798) gbkey=CDS	109.4	95.4	91.9	16.1	9.8	8.2	3	3	73.4615	80.1116	70.434	29.2142	17.5083	14.6812	MMCAP1_0755	MKQLLTQQEVKINNQIKKDFSFLEDRNLETFQIHNRRYLGSKAKALNFIYSIIKPYLDEIDVVADIFAGTGVVSDMFNNLNKTIIVNDILKSNYICYNTWFGNQKVDINKIKEIINELNQLTPNQDNYVSINFANKYFSLENAKKIGLIREKIETYKLNNREKDILLTSLLYAIDKIAHTTGHYDAFIKKQIPAKKIKLLLPDFKNNNTNNQTFCCDANKLVKKIKADLVYIDTPYNSRQYSSAYHLLENIITWNKPQVEGIASKMIDRKKYSSKYCTNKAYESFKDLINNINSKFILVSFNNTENKANSRSNSKISRDQIIQILTSKGELSIFELDYKPYSTGKTNLKNHKEILYLCKVYE
CP001621.68	gene=asnS locus_tag=MMCAP1_0076 protein=asparagine--tRNA ligase protein_id=ACU79563.1 location=complement(94727..96091) gbkey=CDS	5471.1	4148.6	4486.9	330.7	334.4	333.8	3	3	3673.82	3483.76	3438.85	600.071	597.426	597.633	MMCAP1_0076	MEIRQIFEQHSELLDKEVEILGRVRSNRQGKFVSFMILNDGTTFTDLQVVYKTKTKGYEQALQARVSSIVKVIGRVVLTPEKQQKFELQADEIELIDQAIEDYPLQKKEHTTEYLREIAHLRAKTKTFNAIFKIRSAAAYAIHRFFNERNFVYIHSPIITSNDAEGAGEAFLVTTREDADYEKDFFGKKASLTVSGQLHAEAFAQAFKKVYTFGPTFRAENSNTAKHAAEFWMIEPEVAFADLKDNIQLIQDMVKYIINYIFKHNRRELEFCNEHLENGLIDKLNNVRNSEFKITTYTQAIEILKQAVKDGHKFEVSDIEFGLDLGTEHERYICEQVNKAPTFVTNYPKEIKAFYMKQNDDNKTVAAVDLLVPGIGELVGGSQREDNYEKLIKRCKEVN…
CP001621.680	gene=mmyCIIIR locus_tag=MMCAP1_0756 protein=GCATC--recognizing Type II restriction modification system (MmyCIII) endonuclease subunit protein_id=ACU79551.1 location=889915..891954 gbkey=CDS	112.3	94.7	92.1	NaN	NaN	NaN	3	0	75.4089	79.5238	70.5873	0	0	0	MMCAP1_0756	MRLKSPNSIFNMGDTSIRVKQIVEVNKVILEQLNNFMKSNVVWNQNKEEQENFYRLFINEIVELEQDEEYSIFADFWRLRNYKTPDPNKKGLRGRTLTNSLLKLGLINEDRQLSDIGYAYLKNDVKQEDFIERLLGLSVDNLVYLRQLLKLRIYDSSNDNYFYNFRFALKFLSIYKNVNQQHFLTILESIRPIQSQNELLNIIDDYQDVYNNKIDFFIFYNRHFKNYFLREKNLDDIENKLNLNNWDNDYLISKFYNNKSHKTTELYLEFIRCLIEFKNNPTTLKLEQLIKISKEEKIKKAFCYGNKVFEFNKDDNLQMFLANNKNNPLLEKQNQQIYIQFVFSKLWDLIKEYSDMCKRLFESTGLISFENKLVNLNNHIVIDALLKVLGNKFVLCGSE…
CP001621.681	locus_tag=MMCAP1_0757 protein=conserved hypothetical protein protein_id=ACU79114.1 location=complement(891992..893077) gbkey=CDS	190.5	136.3	155.5	16	3.4	11.4	3	3	127.92	114.457	119.178	29.0328	6.07431	20.4105	MMCAP1_0757	MEKKKLGISVYCKKASFDQIIDYLKLARSYNFEILFISFVHLLKTDYFKNIDVIKKAKELNYYVIADFDQTSLNNLTKSNDLKTIKEIGIDCIRFDQQIDAQSLANLTYNPYEIDVQLNISNSFHFLDNVLDFKPILTRLSGSHNFYLLKDSALDIDFFNKTTDKFIRKNLNTSAFISSQIANITLADNYNKAVSLEFFRNIDIISQAKYLFYSNKINNVIIANMFASKKELEQLSLLNKDHLTLKINNLQKITKTEKEILLWNNHFRRSDINTSYIRSTFSRTIWNSFDIKPNNIKQVFNKGDIVILNNNANRYKGELHIILKDNYIDNNNLYNYIASVHSDELYLLDFIESNSHFKISL
CP001621.682	locus_tag=MMCAP1_0758 protein=beta-glucosidase protein_id=ACU79156.1 location=complement(893079..894467) gbkey=CDS	50.4	38.9	33.9	NaN	2.8	NaN	3	1	33.8433	32.6661	25.9816	0	5.00237	0	MMCAP1_0758	MFKFKKDFWWGAASSGCQTESDKDKPNLNIMDYWYKQTPTDFYDNKGPNITCDTYSNYKTDVKLMSEIGLNSFRTSIQWTRLIKNLYTGEVDLKQVEFYRNYFLEIKKNNIKLIVNLFHFDTPIELENIGGWTNKKTVELYFLYAKQCFKYFSDLVDYWTTFNEPIVLVDGCYLNKWYYPKISNLKLAIQAAYNTILAHCKVANYFHSYFKNDQNKKISIILNLTPTIPKNSELKHLKAAKIRDELLNKSFLNAVIKGQFSNFLIKFLNENNLMPEYDQSELNEIKKTRIDFLAVNYYQPARVQAPNNNLNNSNDLKLENWFEVYVDKKSRINPYRGWEIHPQTLYDIAIDIKNNYDNIPWIVSENGIGVGDENRFLNKQGYIDDQYRIDFIKEHLIYL…
CP001621.683	locus_tag=MMCAP1_0759 protein=sugar kinase, ROK family protein_id=ACU79267.1 location=complement(894460..895338) gbkey=CDS	25.7	19.5	27.8	4.4	NaN	NaN	3	1	17.2574	16.375	21.3065	7.98401	0	0	MMCAP1_0759	MVLVFDVGGMSTKIALIDNKTDQIIIKDQIIYSNFIDGQSLLFEIKKKINQFKNNDLKAICISSCGIINSISGEISGSSAIKDYYLINYKKDLKEFNIPIFIENDANCAAICESEIGVVKNNKNAVFLVIGTGIGGAIIINKMLYKGSNLFAGEFGCSLVKIQNNQYINVSESYSAKAIETNYFTLTNKKLTAKEIFNKYKEDKVAKKVINKTINGLCKLMINITTIIDPEVFVIGGAISQNQLFINLLNKKFKKYMAMSNINLNIKIKPAMFFNDANIYGAYLLYKKDLYV
CP001621.684	locus_tag=MMCAP1_0760 protein=PTS system, fructose-specific IIA component protein_id=ACU79177.1 location=complement(895340..895798) gbkey=CDS	112.9	94	109.4	113.4	98	84.9	3	3	75.8118	78.936	83.8464	205.77	175.083	152.004	MMCAP1_0760	MNKEIFNINHVFIDVIANSKKQVFEIIALKFYLLGFTTDKNKALKGLKKREKEGSTGFNDGIAIPHAKIKEITKPGVFVFKFKNGVEWDSIDNSLVTIAIALAIPENDSANDHLKILSSIARKLVDDDFRKDLNKANNVDQLYQLISKVEII
CP001621.685	locus_tag=MMCAP1_0761 protein=glycosyl hydrolase, family 38 protein_id=ACU79277.1 location=complement(895812..898478) gbkey=CDS	9.9	13.7	14.6	NaN	0.7	75.8	3	2	6.6478	11.5045	11.1897	0	1.25059	135.712	MMCAP1_0761	MSWNIYVVCHTHWDKEWYFTKQDSDVLLCSNLNQIIKILSSNDEYKSFTYDGQVSIIDDYLTYYPENEVQIKKLCEQKKLIVGPWYTQPDFFNTTSESIIRNLLIGINLSKKYNADYLKTAYVPDSFGHNNQMPQIYKSFNLNNFIYWRGVKNSQLKKAGTLHYWQGIDKTKITSYNFYYGYWVLGSKFAYTKLTKDNLKNEAIEFLKNITPILNQLKKVTKNSDNNLLLPLGGDQAPIVELTPEFFKQVNKLSNDNWILTDYDTYFKNINNSNLKTIKGELKSPSKARIHKTIASQRYDIKQLLKIVEHNLYNVLEPLAIYYKYLTNKYEKQIINNALKLILTSQAHDSIGCCNSDETNLNIYNRLLQANYLIESQITKLIKNLSLNINLKENQVLVF…
CP001621.686	locus_tag=MMCAP1_0762 protein=PTS system, fructose-specific iibc component protein_id=ACU79149.1 location=complement(898490..900331) gbkey=CDS	152.8	145.2	137.9	51.9	65.4	62.6	3	3	102.604	121.931	105.689	94.175	116.841	112.079	MMCAP1_0762	MSNDNKTIVSSNKDQLEGLKNIVAITACAAGVAHTYMAADSISKAAKALNINVHVETQGTIGAENVISDQQLQQADLVIIAADVKIDTSRFNGKKIYITGVNDAIKKPELLIKTAWQQAVEQGKKGTKVGVFTIGATKKKGILNHLMTGISWVLPLIIAAGILMAIANLSAFQTIYSDQVGDYTQAWVLYERPFPQFLMNVGSLGFKLVIPLFSAFIAYSIADKPGIAPALIGGWIINDNKMLGINVPVSENSSIEPGAGFLGAIIVGLLAGYLVKLLKSLRWWKILKPVVPLMIIPIISVFIISTFVKFVIGAPIANLVLGLFNGLSALQDKFAGTSFVIALVVSMMIAFDLGGPFNKTALVFGTVVFYQSLAQVLSNGQTFWDANFVPGTAAQAAIS…
CP001621.687	locus_tag=MMCAP1_0763 protein=putative liporotein protein_id=ACU79120.1 location=complement(900346..901122) gbkey=CDS	33.8	21.9	13.8	153.8	172.1	435.6	3	3	22.6965	18.3904	10.5766	279.077	307.467	779.895	MMCAP1_0763	MKKVLTTLSVLSMITIPITITVSCSSWRTAPMTVKQISDVLDIYKNESLKQTNSDNVVVIKASGLSNIDINSLQKIKENRENKLNKKIEENSKLIIDKLTEKISSVVSNKIINFETISSDKTNLKDDIFSKQITKDFIKEKWKPYYLTISLADINFNSLVSKNENQWLSKLNGLQTVTFRNKDKSISIDKTNKPKWFDTNINKVSIIDSLKLDSMLSSKTDTNLKINKIVYLVSFNANVLSFKDAKNVAFYIEHDLNN
CP001621.688	gene=hpt_2 locus_tag=MMCAP1_0764 protein=hypoxanthine phosphoribosyltransferase protein_id=ACU79183.1 location=complement(901288..901839) gbkey=CDS	237.3	207.9	249.3	48.4	44.9	64.7	3	3	159.346	174.583	191.069	87.8241	80.2166	115.838	MMCAP1_0764	MYDLKNIKKVLFTKEQINERIKQVANQVKQYYLEHPPVNGPLITVGLLKGCVIFNTEFVLNFDYPIQMDFMAVSSYNGMQSTGAIKIKLDTSLDLTNRDVLIVEDMVDTGLTLSKVKEHIIYKGANSVKVVTLVDKKDFHTVDFTPDWNCFNIDDYYIVGYGFDCNEDYRNLPYIALYQPDNN
CP001621.689	gene=purB locus_tag=MMCAP1_0765 protein=adenylosuccinate lyase protein_id=ACU79221.1 location=complement(901875..903173) gbkey=CDS	1135.2	790.5	923.1	407.5	405.9	379.4	3	3	762.281	663.818	707.482	739.428	725.165	679.275	MMCAP1_0765	MISRYQVKEITDIWSDQNKYNTWLKIEQLVTNGWAEIIKINKDDLFKINNDLKVDLNRMLEIEQETKHDVVAFTRMLSEQLDNESKWIHLGITSTDIVDTAQNYLIKQSNQIVFNELENICDTLKTLALEHKNTLIMGRTHGMYGEPTSLGLKFCLWYDEFLRHIKRFELARNDIEVVKISGSMGNYANLDPQIELYVADKLNMNIDSLSTQVSQRDRHIFLVEVLANIASTLEKISTEIRLLQRSDVNELAEGFLKNQKGSSSMPHKKNPISSENIAGLSRYIKSIVHIVLENNNLWHERDISHSSNERIYLPDIFNLTVYILKRMNETLINLVINKTQMLEHIKQAKNIYFSQRVLTFILLEQTNVTRDEVYDLIQQITFKCSKNNLDFKTEVLNSK…
CP001621.69	locus_tag=MMCAP1_0077 protein=putative hydrolase of the HAD family protein_id=ACU79786.1 location=complement(96100..96939) gbkey=CDS	1014.3	787.9	767.4	156.3	165.7	172.6	3	3	681.097	661.635	588.151	283.614	296.033	309.022	MMCAP1_0077	MLKNIKLIVTDLDGTVLHHGKLANDIDKPILEKAIKNNIHVTIATGQPYKSAKPRADLFNIGEHVDLAVLANGALISKISNFEPVYVNKIDNAIVNKMVKKLTELNICTVIFTATASDVYWNNIPFEVDSMIKRNWFERFNKTICSTDGNFDFIDPVQIMIFVPLEKNQILEDWFKAEKLDEHLTSMRNHIETIPIYEFTNITATKGKAIKKMAEILNVDINDVLVFGDNMNDMTMFEEIPNCVAVENAVDPIKQKAKYITDTNINGGVGKFIEKYILN
CP001621.690	gene=purA locus_tag=MMCAP1_0766 protein=adenylosuccinate synthase protein_id=ACU79134.1 location=complement(903166..904464) gbkey=CDS	4504.1	3675	3587.1	926.3	907.7	933.4	3	3	3024.48	3086.06	2749.23	1680.81	1621.66	1671.15	MMCAP1_0766	MKNNYKSLVIVGSQWGDEGKGKITDYFSQKADVVVRFAGGDNAGHMIEFNNKRHKVTIIPSGVFNPKVKNIIGNGTVINLKSLVSEIKRLNESNISTDNVFISDRAHLIFDWHTLIDQLQEENRKENKIGTTKRGIGPTYADKAARYGIRICDFQNPNFKDILKENLDYHNQIITKVYNHEPLDFDVIYNELMTNYQFIKNNIIDSGYEVSNLINENKFVLFEGAQGVLLDIDHGTYPFVTSSNCSANNASIGTGIHNKQINKVLGIVKAYNTRVGSGAMVSEIKTELAHKLRERGREYGSNTGKPRRIGWLDLVALKYAIRVGGIDQLFLTLFDVLDTEAKIKICTHYKLDGKIIDWFPASDYELKKCEPLYEELDGWNQDITKVTSFEELPINAQKY…
CP001621.692	gene=mmyCIVR locus_tag=MMCAP1_0768 protein=GANTC--recognizing Type II restriction modification system (MmyCIV) endonuclease subunit protein_id=ACU79220.1 location=complement(904818..905333) gbkey=CDS	1361.7	975.2	1194.5	102.1	87.1	91.7	3	3	914.375	818.919	915.489	185.265	155.61	164.179	MMCAP1_0768	MVKDAKELNSILQKEFDDSWDVIIVPKKVIKNSSIKNSMEPDFLIIQKSSETLNIIELKDGWVFDTKKVAGEYQQLINFQNEISKSISFITKIWICSFNNDSKEEIFLGLKSKVPIKHIMTGEEFCDLLNISKQEIQKERQRDSEKNLNFFVTELLKIDDVRNRIIEELSK
CP001621.693	gene=mmyCIVM locus_tag=MMCAP1_0769 protein=GANTC--recognizing Type II restriction modification system (MmyCIV) adenine DNA methylase subunit protein_id=ACU79717.1 location=complement(905495..906214) gbkey=CDS	644.3	545.6	675.2	115.4	111.7	136.3	3	3	432.644	458.165	517.487	209.399	199.559	244.03	MMCAP1_0769	MKLSPSVFSNKRTKISELGKDIFKNERMEFNHKYGLDGLVILNNIKDNAIPVVFFDPQYRGVLDKLSYGNEGKRQIKRSELQQMTEEKIVHFIREMDRVLIPTGHLFLWVDKFHLCQGISDWIKDTSLSIVDMIVWDKEKMGMGYRTRRQCEYLIVLQKKPIRAKNVWRLRNIRDVWKEKIVGKVHPHQKPIELQKILIQAVSNPGDVIMDVAAGSFSVLTSCIETGRLFIGTDIKEKQ
CP001621.694	locus_tag=MMCAP1_0770 protein=conserved hypothetical protein protein_id=ACU79543.1 location=complement(906275..907120) gbkey=CDS	33.1	24.7	24.5	NaN	NaN	NaN	3	0	22.2265	20.7417	18.7773	0	0	0	MMCAP1_0770	MYKKNKKPKYNKEKTICKEIGYFLNKNNEYQIHPFPSTVNKVPKKLPEFITNLTLAFWNNENEIICNLDKWNLKNVTSLNRMFKDAKSFDQDISNWNTSNVVDMQLLFDGAENFNQNLNKWDTSNVLNMEAMFRSAYLFNIDLNKWNTSKVQNMRSMFYEARSFNGDISTWDVSSVKHMEYMFYGVLKFNQDISSWNTKNVINTRSMFKNAIGFNQNISYWNTSNIKEMSWMFHNARNFNQDISSWNVSKVNLFNSFSNNSKIDKNKKYLPKKFISKISKT
CP001621.695	locus_tag=MMCAP1_0771 protein=ribonucleoside-diphosphate reductase, alpha subunit protein_id=ACU79657.1 location=complement(907226..909388) gbkey=CDS	7371.3	5510.7	6266.9	1147.5	1122.2	1082.5	3	3	4949.79	4627.58	4803.08	2082.19	2004.88	1938.1	MMCAP1_0771	MKENKNTIVLDDVDDEYIKLNARSKIFSKDQDNFQLDVKAAELYLKNYIEPRMKKFSSLKERLDYLLENKYYDSEILNKYSFDQISQLNDYAYSFNHHFPSFMGALKFFNAYGLKTFDTTMYLETYTDRVLMNALFLGNGNFTKAKNLLKDMMLGRFQPATPTFLNAAKKHRGEYVSCYLLRTEDNMESICRTISTSLQLSKRGGGVAICLTNLRETGSPIKNISGLSSGPIPVMKILEDSFTYADQLGQRQGAGAVYISAHHPDIISVLDTKRENADEKIRIKSLSLGLVIPDITFELARDNKDMALFSPYDVQKVYNKPLSDISITEKYYEMLENPNIKKTYISARKFFLTVAELHFESGYPYILFEDTVNRRNAHDKKGRIIMSNLCSEIVQVSTA…
CP001621.696	gene=nrdI locus_tag=MMCAP1_0772 protein=NrdI protein protein_id=ACU79096.1 location=complement(909375..909848) gbkey=CDS	12720.4	8718.2	11018.8	1126.3	1188.5	1204	3	3	8541.68	7321.06	8445.03	2043.72	2123.33	2155.63	MMCAP1_0772	MHSNVKKVTDKDVIKPVGIPFVVYFSSISNNTHRFIQKLEIENIRIPYELDQSISVNRDYVLVTPTYSGGGEYVEGAVPKQVIKFLNNKENRSFCRGVISSGNTNFGDTFGIAGPIISKKLNVPFLYQFELLGTQYDVSQIKQILLKFWEDGNNERK
CP001621.697	locus_tag=MMCAP1_0773 protein=ribonucleoside-diphosphate reductase, beta subunit protein_id=ACU79237.1 location=complement(909857..910876) gbkey=CDS	7207.4	5951.2	6816.2	818	873.9	944.1	3	3	4839.73	4997.49	5224.07	1484.3	1561.28	1690.31	MMCAP1_0773	MAKEQKYYHESVSPIEFVKNNFKGNLRSVNWNVINDEKDLEVWNRITQNFWLPEKIPVSNDLSSWRSLSSEWQQLVTRTFTGLTLLDTVQATVGDVAQIEHSLTDHEQVIYSNFAFMVGVHARSYGTIFSTLCSSEQIEEAHEWVVKTETLQKRAKALIPYYTGTDPLKSKVAAALMPGFLLYGGFYLPFYLSARGKLPNTSDIIRLILRDKVIHNYYSGYKYQKKVAKLPVEKQAEMKEFVFKLLYELIDLETAYLKELYAGFDIVDDAIRFSVYNAGKFLQNLGYDSPFSEEETRIEPEIFNQLSARADENHDFFSGNGSSYVMGVSVETEDEDWEF
CP001621.699	locus_tag=MMCAP1_0775 protein=3'-5' exoribonuclease, VacB/RNase II family protein_id=ACU79196.1 location=911495..913609 gbkey=CDS	153.3	127.5	141	60.9	68.7	61.4	3	3	102.94	107.067	108.065	110.506	122.737	109.93	MMCAP1_0775	MESKIIEILKKNHHKISLNKLLTYFKALDYSLVKNYLDQLEKNNNIAISLENNIYLLDEIYKKGTIKLNPKGFGFINDVNDLTTEDHFIAGVDLNNSIHQDEVVYILKQEEDNRLKAIVIDLIKRNKVYLIGEINRSFDKRFLDFIPNDKSFDSFRFVIVNKNEFKYEEFNIIKAKIISCKERKIFIRLIKIIGNSKKASDRILAIAEEFDIKTSFDKQTLDNAKQINLSTDKLEKEFLKRQNNSLVNKTIVTIDGIDSKDLDDAICVEKLENNNYKLFVAIADVSYFVRYKTSLDKEALLRGNSTYLANKVIPMLPNILSDDLCSLNPNTKKLVFVCEMEFDNNANMLNKKVYESVIISKARLNYDEVNNYFKTKTWTHDDKTKKMLDIAYELYKKLE…
CP001621.7	gene=gyrA locus_tag=MMCAP1_0007 protein=DNA gyrase, A subunit protein_id=ACU79834.1 location=7435..9939 gbkey=CDS	1272.6	1337	1204.2	164.2	163.4	161.4	3	3	854.544	1122.74	922.923	297.949	291.924	288.969	MMCAP1_0007	MNNENNNNDSLNENQDHYHGKISPIDISTEVRKDFLEYAMSVIVSRALPDLKDGLKPVHRRIIYAMNDLGITSDKPHKKSARIVGEVIGKYHPHGDSAVYETMVRMAQEFSYRYPLIDGHGNFGSIDGDGAAAMRYTEARLAKISNYLIKDIDMDTVPFIDNYDASEREPAYLTGYLPNLLVNGTMGIAVGMATSIPPHNLKEVVSAINAYIDNNDITIDEILNDHILGPDFPTGALMTNGSKMREGYKTGRGSVIIRAKIDFEENKKHDRFVVTEIPYQTNKAKIIEKIAELVKDKTIEGIFDIRDESNYEGIRIIIELKKDANPDVVLSKLYKYTALQSSFSINLLTLNNNLPVLLDLKTIIKNYVEFQISVIIKRSIFEKNKLTKRYHILEALHIA…
CP001621.70	locus_tag=MMCAP1_0078 protein=putative hydrolase from alpha/beta family protein_id=ACU79868.1 location=complement(96950..98080) gbkey=CDS	32.6	34.1	34.2	63.1	59	63.1	3	3	21.8907	28.6353	26.2116	114.498	105.407	112.974	MMCAP1_0078	MTTKQKKALIKKSGNKIFRSINKSFAKFHKLLETSVFFKKSHSKKHIYMNPEINKMNKIMRLFFKHKELEFKINDNLIPIKFKTSDNITISALKYITDHNSKKWVIVSHWFLGDKYWSLYWSKAFIELGYNVLVYDFRNHGDSEETPFVTMGLLESKDLIAAINYLNKTQKVQTIGLLGLSMGAFVINYLTLTQQKFLEENKVKFIISDSSYASISSLLNKLLKLSFKRFFSKKYDIYLIKQILKKQKDLTLSDWNKMNLFDKYEKQHIIPAKIPILFIHSIEDKITSHNDSIRMFINRKKFNLNDELLIYETSKHCLSLKEHYYQTIYRILQFENKIIKDNNKTSIALEKMGIIDKIILNNFNEKKEISTFFYKD
CP001621.700	gene=smpB locus_tag=MMCAP1_0776 protein=SsrA-binding protein protein_id=ACU79200.1 location=913619..914065 gbkey=CDS	560.2	419.1	376.6	369	350.2	349.6	3	3	376.171	351.937	288.634	669.568	625.654	625.921	MMCAP1_0776	MSEHLIVKNKKAYFNYEIIQTYQAGIVLNGPEIKSIRNHDVSINEAFVLIRKKEIYILNMNVKKYQFANYIKGLEETRTRKLLLHKKEIIKILNKIKQENLTIIPVKLYFKNDYVKLEIALAKGKKLHDKRQTIKKRDTERKELKDYK
CP001621.701	locus_tag=MMCAP1_0777 protein=conserved hypothetical protein protein_id=ACU79302.1 location=914065..914550 gbkey=CDS	66.6	98.6	78.5	303.4	289.1	273.2	3	3	44.7216	82.7988	60.164	550.534	516.495	489.135	MMCAP1_0777	MIIFTQQTSHIPTWAVYLILVLGFFGLIISLYGASTAFKYNKNLKNKNNYKKVLNLLSTRQAYSWTQIDNIDQQGYFLIGITLKDSNYNKEKPLITLLKITDLKTDISRFKSNINDYKNIINYLKQYNLTTKDLVFIIIEKVENSDELDKLLIEWNSLISA
CP001621.703	locus_tag=MMCAP1_0779 protein=PTS system, eiic domain protein protein_id=ACU79503.1 location=914972..917209 gbkey=CDS	3064.7	4573.6	3203.6	1320.2	1371.7	1351.9	3	3	2057.93	3840.66	2455.3	2395.57	2450.63	2420.43	MMCAP1_0779	MLTQTNKSSFKDKLKAFGANIMPTLSKLSKAFLLPIALLPIAGVFLGVGAAIAANTPEQSALWFIGKVMGNMGDVCFGNLPVLFCISVALAYTKDSGVAAITAVVGFLVFNGVQAPLFTQGQVQSDKVSEYSLLWYKHVSNSLTGSNMGILSLNTGVLGGIFVGAIAAKCYNKFHQTQLPTAISFFSGTKLVPIITFVAVIPLSFIFMMAWPVIGLGLNKFGQVSGTLPYGTDSLIFEIVERSLVPFGLHHVFYAPLWWTSAGGSIAEGFNNLSKQSEAIQKVFVDSYNSLHGTHHTKLQEIIDIVQKNKELWGAVGDQIISQRVIGHLNILNFTDVEKLGINLGRFQSGKFGFMLLGLPAAALAMWLAAPKENRQQVFGIYFSAAFTCFLTGITEPIE…
CP001621.706	locus_tag=MMCAP1_0783 protein=glucokinase protein_id=ACU79157.1 location=920016..920981 gbkey=CDS	844.7	664.7	725.4	146.6	148	149	3	3	567.212	558.178	555.961	266.013	264.411	266.768	MMCAP1_0783	MKKILGIDLGGTSAKVGVISQNGDLEHSFSITNPKTKIIENLYFEISKILKTLNVDENDIMLVGITAPGFVDHNKGIVVMAPNIENGWFNYDLKTEAEFLFKKPVYVINDVNAAALGEYRKGSGLVYKSGLFYWLATGIGGAIICDGKLISGSHGFAGEFGHGGSNNHNLKCNCGLNNCIEKVCSATTIPNSLLTILKNKYLEFYNKHFLNIKDLDMKLLFEIYNNLNKPIELKNSLLEVYDELFNHMSLLIHALDPEVVVIGGGGSLAGNNLLELFQLGVKNKLTDSYKDIVDFKLALLKNDAGMIGAAFYALEQSLKTN
CP001621.707	locus_tag=MMCAP1_0784 protein=carbamate kinase 1 protein_id=ACU79869.1 location=complement(921049..921981) gbkey=CDS	119.2	81.9	96	12.2	17.3	13.2	3	3	80.0422	68.7751	73.5763	22.1375	30.9075	23.6332	MMCAP1_0784	MSKIVIAIGGNALGNSPIEQLEIVKKTAKSLVDFIVQGNDIVIVHGNGPQVGMINNAFDIANKNEVKSPILDFPECGSMSQGYIGYHLQQAIDNELKLRNINKPTVSLITQTLVDKNDAAFLKPTKPIGSFMNESEAKKLAEQNNWNISEDAGRGWRRVIASPKPIDIIEKDAILQLVNNSFIVIAGGGGGIPVYLKDDKLVGIAAVIDKDFAAAKIAEIIDAESLIILTAIDKVMINYKKENQQALDQITLAQAQEYIDQNQFAPGSMLPKVQAVMSFVKKTNGKPAYIGSLEQADKVLQNLSGTKFVK
CP001621.709	gene=arcB locus_tag=MMCAP1_0786 protein=ornithine carbamoyltransferase (ArcB) protein_id=ACU79303.1 location=complement(923536..924531) gbkey=CDS	971.2	1665.3	1100.3	405	414	447.1	3	3	652.156	1398.43	843.292	734.892	739.637	800.484	MMCAP1_0786	MALNLKGKSFLKLLDFCPREIRYLLDLSRDLKRAKYTGNEIQTMQGKNVVLLFQKDSTRTRCAFEVAALDQGAHVTYLGPSGSQFGKKESVADTARVLGRMYDAIEFRGYEQAVVEELAKYSGVPVYNGLTNEFHPTQILADFLTVEEYKGNLKGLKFVFAGDTRNNVATSLMIGCAKMGMHFVGAAPKQLWPSQDLIDQSKEIAKETNAIISFTEDMKQACSDADVIYTDVWVSMGEPAEVWESRINLLKPYQVNMDAIKVAKPDVIFMHCLPSFHDLNTEIGRQIYEKFNIPEMEVTNEVFESKHSVVFEQAENRLHTIKAVMVATIGK
CP001621.71	locus_tag=MMCAP1_0079 protein=probable O-sialoglycoprotein endopeptidase protein_id=ACU79446.1 location=complement(98104..99060) gbkey=CDS	485.4	347.8	422.2	47.5	45.1	49.8	3	3	325.944	292.063	323.583	86.191	80.5739	89.1615	MMCAP1_0079	MKILAIESSCDEFSISIIDNNKILTNVISSQIKDHQVFGGVVPELAARLHVQNFNWVLKAALTEANLSIKDIDYVAYTKSPGLIGSLIVGKLVAETISLYINKPILALDHIQGHIFGASIENEFIYPVLAMVVSGGHTQIEIINSANDFQIIGSTRDDAIGECYDKVARVLGLSYPGGPILDKLALKGNKDSYLLPVLKDEDNYDFSYSGLKTACINLIHNLNQKNQEINLEDFAASFQYTATNIVEKKLEKAIKEFKPKTLTVAGGVSANSEIRKIILRLGEKYSIKNTFVPKMSYCTDNAAMIAKLAYEKILLNNK
CP001621.710	gene=mgtA locus_tag=MMCAP1_0787 protein=magnesium-importing ATPase protein_id=ACU79613.1 location=complement(924792..927620) gbkey=CDS	113	105.6	114.2	111.1	119.3	93.5	3	3	75.8789	88.677	87.5252	201.596	213.137	167.402	MMCAP1_0787	MFLFKKRKFSPKKITRHKKKTHFANERFIKQVSNLEQNEVLEIMQLQHFGLTNEQYESRLKKYGTNELKKKRFNLIAEFLHAFFGPFNIVLLLISLYNFISYATNGFYQDTNSSDSKFELVGALIILVMVLASGLASFIQSLRSHLVTKKISSIVKSTTNIIRHKNDEDVEDYLKITKRNQLDLIRLGEEIDVKQLVPGDLIYLSSGDMLPADVRIIQSTDLFINQSSLTGESIPVEKHANNKKNTNNILDLENICYTGTSVVSGSALAVVLATANDTYFSTISKAILEKRPDSSFTKGIKQVTRMLLIFMLVMVPTVYLAKSIIGTISSGGSFDSIKDNPWFQAIFFAVAVAVGLTPEMLPMIVTTNLANGASKMSKQKVVVKQLEAIQSLGAIDVLC…
CP001621.711	locus_tag=MMCAP1_0788 protein=conserved hypothetical protein protein_id=ACU79482.1 location=927967..929154 gbkey=CDS	28.2	34.5	34.4	586.2	541.2	586.7	3	3	18.9362	28.9712	26.3649	1063.69	966.887	1050.42	MMCAP1_0788	MRDYNSSNNRNNHNNYQSNNSQRNNQNDRYYQNDNKNNNYHNQYYDNRYDQNQYSDYDDDRYYDQDYRYNQNYQDQYYEQQEYDLQQVEYNNSNSDQQVKFIPDKKIRKIVRFNSIKSFISIFILVGLIGYFTVFLINHYYQFLYDPNNIKQYHKTLQSWLFTMNGFKVWHLSVIIAILSVCCIIYIVVASTLFSNYNKYLKDMQHRTEEYQAQKLHIPYPKKPEEGIPPLLIKKMYEKQIKKPYYANWFCLAAYIYLIVAAIIYTMFVIFKWGSAKLQDHETVVRITLKQYFVQPGQLTPYYILLGIFLAIILIHIIVLLSVKYVKNALEEYWQVPILSDEKIKDLEKKANRRSLIIFIILIVIAFFILAFFFIFFKVERRKGSIFSLFKRPGK
CP001621.712	locus_tag=MMCAP1_0789 protein=ATP synthase, delta subunit protein_id=ACU79860.1 location=complement(929226..929525) gbkey=CDS	91.5	87.6	105.8	2948.2	2947.4	2992.1	3	3	61.4418	73.5616	81.0872	5349.65	5265.71	5357.03	MMCAP1_0789	MGIKLKILTPNGTFVENKEVDIINLKTIDGDIGVLANMAPFVTALRNDTLNFKEKNTYTYIHVDQGLVVISKNQCKIITENLYLVDKQDRELPTPLKLA
CP001621.713	gene=atpD_2 locus_tag=MMCAP1_0790 protein=ATP synthase F1, beta subunit protein_id=ACU79595.1 location=complement(929525..930952) gbkey=CDS	1712.3	1362.4	1561.2	10714	10677.7	10567.5	3	3	1149.8	1144.07	1196.54	19441.1	19076.4	18920	MMCAP1_0790	MVSKNTTDKKKNQSIGKVIQVLGPVVDVKFSENNIPKIYDALIVDNNGKKLVLEVEQNIGDEIVRTIAMGPTEGLKRGLDVINTNSPITAPTGIEVLGRMFNVLGDPIDEKPDLDVKREPIHKDAPKYEELVTTTEILETGIKVIDLMIPFTKGGKVGLFGGAGVGKTILIQELINNIAKAHNGVSVFAGVGERTREGNDLYHEFIEAGVLNKTCLVFGQMNEPPGARMRVALTGLTIAEYFRDQKNMDVLLFIDNIFRFTQAGSEVSALLGRMPSAVGYQPTLSTEMGSLQERITSTKNGSITSVQAVYVPADDLTDPAPATTFTHLDARIVLDRSIASLGIYPAVDPLASSSRVLDPEIVGQEHYDIALRVQIALQKYQDLQSIIAILGMDELSEED…
CP001621.714	gene=atpG locus_tag=MMCAP1_0791 protein=ATP synthase F1, gamma subunit protein_id=ACU79061.1 location=complement(930961..931803) gbkey=CDS	627.6	550.8	554.8	2622.5	2610.9	2779.8	3	3	421.43	462.531	425.21	4758.65	4664.53	4976.93	MMCAP1_0791	MPNLKGLKTEILSVKNISKITNAMQLVASAKLRKISKKVIDTHNYVSEVYSLFNDIISQADKSVFLKDSNFETKKTLWIVINSNLGLCGGYNSNVNKLVLQNLKTNDEIFAIGSKAVSFFKSKKIKIRDQVTNIDINFTNEKAKIISNDLLAMYTNREFDEIKIVYTKFINNVTFEPAIIRIFPIVKSELHFTHKQKIIFEPDADQILNNTISIYINAIIYGTVIESQVSEQASRRTAMENATNNGQNLEHELSLKYNRQRQGAITQEISEIVSGANAQS
CP001621.715	gene=atpA locus_tag=MMCAP1_0792 protein=ATP synthase F1, alpha subunit protein_id=ACU79340.1 location=complement(931805..933382) gbkey=CDS	587.3	522.4	551.4	7671.7	7552.8	7494.9	3	3	394.369	438.683	422.604	13920.7	13493.5	13418.8	MMCAP1_0792	MSFNIKEISEMIEKQIRNYNKEIVQTEQGTVVSVGDGIALIYGLDNAIMGEFLKFPNNVYGMVLNLEESAVGAVILGDETLIREGDIVKRTNKVVETPVGDALLGRVINALSKPIDNLGPINFTKTKPIERVATSVMARKSVSQPLETGILAIDSAIPIGKGQRELIIGDRQTGKTAIAIDAIINQRNKNVKCIYVAIGQKDSTIVQVVEKLKKYGAMEYTVVVNAGASQPAPLQYLSPYVGITIAEEWMENGSDVLIVYDDLSKHAVSYRQMSLLLRRPPGREAYPGDVFYLHSRLLERAARVNENYGGGSITALPIIETQAGDISAYIPTNVISITDGQIFLSSELFNQGIRPAVDIGPSVSRVGSSAQIKSIKQVSGTLKLELAQYYELESFAKFG…
CP001621.716	gene=atpH locus_tag=MMCAP1_0793 protein=ATP synthase F1, delta subunit protein_id=ACU79826.1 location=complement(933394..933939) gbkey=CDS	366.8	394.5	402.2	1357.2	1609	1317.2	3	3	246.304	331.279	308.254	2462.7	2874.58	2358.3	MMCAP1_0793	MILKETTINNYATALFNIAVKEKLVDDYIIQVDALIKSLKDKDEFNKLVSFSNKQEKQDAILIIENTFSSFGFDIYLINALKILVENQLFINTRMILKVLYKKLLAYKNIVLGEVYSTEKLTKTQLNAIKKKISNKVNKKVELVNKIDPTLIGGIKVSVEDKVFDGSIKAKLEALKKQMNT
CP001621.717	gene=atpF locus_tag=MMCAP1_0794 protein=ATP synthase F0, B subunit protein_id=ACU79766.1 location=complement(933941..934486) gbkey=CDS	58.6	137	106.9	3374.1	3397.9	3317.9	3	3	39.3496	115.045	81.9303	6122.46	6070.56	5940.34	MMCAP1_0794	MLFQGFNVAINATTQGVPKIVESLFPNLPNFIAHLLATIILVIVLTKLVYKPYKQMIEKQRQKITEVLSDAIEKQTQANIKIKQANTLLEDAKTESVSILKTARMDAEIQKNKIIDNANLQAKNIQSYAQNSIKQEKIKAQLEIKNTIVNLAINSAEKILNKEIDKKTNKQLIEEFIKDLD
CP001621.719	locus_tag=MMCAP1_0796 protein=ATP synthase, A subunit protein_id=ACU79541.1 location=complement(934850..935713) gbkey=CDS	65.4	91	52.3	232.8	227.2	238.6	3	3	43.9158	76.4167	40.0838	422.427	405.907	427.188	MMCAP1_0796	MKLVTFASIKDNLATWNKFNGILITILLVVIIVCTISIIYNKKVRNYNIDDKMPGFLVLVNVFVASVENIVVSILGKKYQKLTPYIMYLFAYIFIGCLLSILGLEAQGTSFTVTLSMGMVTFIMIYYFGIKYQKLAFFKRFRNPVELFTQFTPLISISFRLFGNLIGGSIILGLLYGLLIGFQLSWGVNNIEVDGMTRWASYAIWNPELVENGYLKQYEYWWAGLNLFTTPIMPFLHMYFDLFSGVIQSTVFAMLTLSYWSAQIDDNEKRADLVDQVKEEITNKYQS
CP001621.72	locus_tag=MMCAP1_0080 protein=conserved hypothetical protein protein_id=ACU79637.1 location=complement(99155..99376) gbkey=CDS	506.9	689.7	671.8	318.7	322.6	289.1	3	3	340.381	579.172	514.881	578.296	576.345	517.602	MMCAP1_0080	MAEKQATVYHVTPYDGKWQVKGVGNTRPTKLFDTQKEAIAYANELTKKRQGSVIIHRTTGQVRDSINNKDKKK
CP001621.721	gene=upp locus_tag=MMCAP1_0798 protein=uracil phosphoribosyltransferase protein_id=ACU79339.1 location=complement(936251..936874) gbkey=CDS	12914.6	8005.2	9456.5	1431.9	1355.8	1393.1	3	3	8672.09	6722.32	7247.65	2598.25	2422.22	2494.2	MMCAP1_0798	MAFTEIKHPLIIDKLTRMRKTETSSKDFRENLNEIAQLMVYEIFRDLKLEPVEITTPVAKTTGYTINQPVVLVPILRAGIGMLDGIQKLIPTARIAHVGLYRDEETLEIHQYFAKTTKDIDKSYVIVVDPMLATGGSACKAIDIVKQWGAKEVKFVCLVAVEPGIKRLQEQHPDVEIYAASKDEKLNEKGYIVPGLGDAGDRIFGTK
CP001621.722	gene=glyA locus_tag=MMCAP1_0799 protein=glycine hydroxymethyltransferase protein_id=ACU79342.1 location=complement(936974..938215) gbkey=CDS	5045.5	3856.5	3694.6	565.8	564.7	522.7	3	3	3388.03	3238.47	2831.62	1026.67	1008.87	935.838	MMCAP1_0799	MNTKINPLIKESLNKELKRQQSHIELIASENYVSQAVLELNGSVLTNKYAEGYPGKRYYGGCEFIDEIESLGIKTAKELFNAEHANIQPHSGSQANDAAYKALLEPKDRVVAMSLDAGGHLTHGYHINFSGNTYDFRFYGVNKDTEQLDYQEIEKIILEHKPKLIVAGASAYSRIIDFKKFREIADKVGAYLMVDMAHIAGLVAAGVHPNPMEYADIVTTTTHKTLRGSRGGLILCKQEFAKKVDSAVFPGSQGGPLENLIAGKTQALLEASTDEFKEYGKQIVKNTKALANVLQENGLRLVAGGSDNHLINVDVKSTLQITGKKAEKILESIGIICNKNMIPFDTEKPFYTSGIRLGTPAMTTRGFKEEEFKQVGLIIVNALKDPSEENLEKLAKQVA…
CP001621.723	gene=rpiB locus_tag=MMCAP1_0800 protein=ribose 5-phosphate isomerase B protein_id=ACU79353.1 location=complement(938199..938642) gbkey=CDS	4898.8	3864.2	3983.9	447.5	469.5	494.6	3	3	3289.52	3244.94	3053.34	812.01	838.791	885.528	MMCAP1_0800	MSNRIYIGNDHSAVEMKQAIVKHLQEKNYEVIDLGNNDGKSCNYAKIGQVVAEHVVSDTNSRGIVICGTGIGISIAANKVKTARAALVYEKETAELARIHNDANILALGARIIAISKAINLVDVFLNTPFEGGRHIERVNTLNEYKN
CP001621.724	locus_tag=MMCAP1_0801 protein=conserved hypothetical protein protein_id=ACU79401.1 location=938721..939017 gbkey=CDS	551	377.9	462	262	264.4	293.3	3	3	369.994	317.339	354.086	475.411	472.367	525.122	MMCAP1_0801	MKNSIEISNDKFFELLDKGWQVIDVRDKYEYENFEKFLPSTNISYPEVLDNVNKRWPNLDTKLIFVCNHGNRSGLTARHLNKLGYYNVYVLDTGIAGL
CP001621.725	locus_tag=MMCAP1_0802 protein=putative liporotein protein_id=ACU79110.1 location=complement(939022..941217) gbkey=CDS	46.9	61.2	48.4	95.2	98	102.4	3	3	31.4931	51.3924	37.0947	172.745	175.083	183.336	MMCAP1_0802	MKKILSLISLFSLVTSSSLLVISCNHNYSSTNKIPTIPTANKKPETPNKKIPENVPNHSDNKPEIPKTPNNNTLNPNNQNNHSDHQSNPNYTIPNNITKLVYEPNKIYDPEKNPEYFIDSHLFSSDFLLNNSAYTITRSTNKFHTAKHNMNVFLKTGNYNNPVDFRSVYNSNTDNGFWKHTKDIGWYGDFGNSKEEKIDFYNDNISVDGMVKQAYLKNFEVKEIGSSKSLNFDFNSFILKNPFGFLPSNLSQLFYYMDLESIIKLFNIANVKSIKANFDDEKGEFEVLITDKNNQNYYQKIDQSNTNSLKKNLDFYQYIHDRSFSILVGVNKWDRDEFKLRDDMLSKGYQGGTVWVLDRIVNEQAEKEGYWELLLATNIHVFSFNKTFDKSLYFDKNSK…
CP001621.726	gene=rpoC locus_tag=MMCAP1_0803 protein=DNA-directed RNA polymerase, beta' subunit protein_id=ACU79219.1 location=complement(941307..945074) gbkey=CDS	1696.9	1644.9	1738.9	281.9	279.4	262.1	3	3	1139.46	1381.3	1332.73	511.521	499.165	469.262	MMCAP1_0803	MENLNRKKAIKIELANPDTIRSWSHGEVLKPETINYKTLKAEKDGLFDERIFGPTKNYECVCGRYKKANPMNKGKKCEKCGVELTESIVRRERMGHIELEEPVTHIWMLKVAPYRIAAILDLKAKELEEVVYFVSHIVLEQGNQKHFIEKEVLDLGSSRITKTREKLQLTILDVIDLINDPNHRDTKKANRLLEELKNTAVPFSIDEATSLISKYTGAKFGIGARAVEYLLEKVDLKKEIEAIKVQLENSKKTPNERTKLLKRLETFDALKRSNQRPEWMVMRVIPVIPPDIRPIIQLDGGRFTTSEINDLYRRIIIRNERLKKVKEMGAPSIIVNNEKRMLQEAVDALFDNERKPKPVQGKNKRPLKSLTSVLKGKQGCFRQNLLGKRVDYSARSVIA…
CP001621.727	gene=rpoB locus_tag=MMCAP1_0804 protein=DNA-directed RNA polymerase, beta subunit protein_id=ACU79759.1 location=complement(945086..948961) gbkey=CDS	2046.6	1942.6	2003.8	227.9	238	226.4	3	3	1374.28	1631.29	1535.75	413.535	425.202	405.345	MMCAP1_0804	MAYKIRKINRNVERRDYTKVSMNLSLPNLIGIQTETFEWFKTKGIQEVLDEFFPILSFDGSSVLTLENWGFKEPRLSVRQAREESKIYDAPIYANLKLSVNKTEEIQKEFDGVALDDTLKILTNWLEEKTVSKNITFKQQSQNSYFFELTIKKSDKPDLIQIDIIEDKKTSLICNVSIYKSGEVFLGDFPLMTEAGTFIINGSQKVIVSQLVRSPGAYFNKELNRKTGEMIYFADIIPSRGTWLEYETDSKKTGADAINPLYVKIDKSRKTTATSLLLAFGISKDDILDIFDNDEVLVETLQQDSIVGDFKIDWSNQVQEIYKKIRQGETATSEGASKFINSILFDKRKYDLTKAGRFKLKQKLSIKNRILNRVIAEDIVDANNNVLVAKDTEVNKHNI…
CP001621.728	locus_tag=MMCAP1_0805 protein=conserved hypothetical protein protein_id=ACU79571.1 location=complement(948951..950126) gbkey=CDS	38.2	32.3	30.8	66.8	55	69.1	3	3	25.6511	27.1237	23.6057	121.212	98.2609	123.716	MMCAP1_0805	MSFDYFLNNKSLNKINRKLENNIFKTPLPYSLKSKFNYNFIDKISKDRFLSYYTKAFYDDFLESSVEKKLKTYELALLVMNETKIDLDFLSVLKIFRDIKKGKTPTNYLERLIFNIIYAYEYIKKPKVLINEENLEMLISILLVGLEYDLDLKTNYYRTPKTKTLISNVLSSQLISKELENLLDYLKFLQANNLCTYSQTYLIFSTLVLISPFQKYNLIFATLLSQWISFQYNNSYKLVIPICHFLKNQNEYMYELENLLNNDFNADKLINLFNIDYLKNINMYNHASCIYKWVKKDKKRLFIFEDDLSFFVLILILQNTKNLSFNNIKTLLTINKIKLFTDEQIKSTLANLIANQVLQTTSTSVVKYVLVDKYLEKSKYLVNMKGLYNGL
CP001621.729	gene=rplL locus_tag=MMCAP1_0806 protein=ribosomal protein L7/L12 protein_id=ACU79465.1 location=complement(950297..950665) gbkey=CDS	17710.7	17851.9	18692.5	12291.8	11671.3	11637.9	3	3	11892.6	14991	14326.3	22304.1	20851.5	20836.4	MMCAP1_0806	MPITKDEIIKALEEMKLNELNELVKAIEDHFGVVASVGVAAAAPAEATNAAPTEVSVVMTSVGQQKVAVIKVVKELTGVGLMDAKKIVDGTMPVTIKEHVKPEEAEEMKAKLVEAGASIDLK
CP001621.73	gene=trmE locus_tag=MMCAP1_0081 protein=tRNA modification GTPase TrmE protein_id=ACU79301.1 location=99576..100934 gbkey=CDS	329.1	226.9	240	69.4	72.2	59.1	3	3	220.989	190.538	183.941	125.93	128.99	105.812	MMCAP1_0081	MLINDTVVAPATNISTQAIALIRVSGSEAFLIVNKLIKDKKLEEKRGLFLRKLYFENELIDEVVLSCFVAPNSFTGENVVEIACHGGILNTNKIINILIQSGARMALRGEFSQRSFLNGKIDLIQAEGINNLIHAKNDLALKIGVANMSGSNNKAIIELKDNLLDIISRIQVSIDYPDYDDVEGSSIEDLTNLLEVINDQINKLLMRSKMAFKNSEGIKTAIIGQTNVGKSSILNALINEDKAIVTDIPGTTRDIVEGQINLENVSLNLIDTAGIRKTSDVVENLGILKSKNLINEADLVLFVVNKENINDSDNQEIFELLKDKTYILIVNKAEKLSQTEKQNLEKKYENIVFTSAINHDIDQLVLRINQMFLNEEISKNDELILIGLNQITLVEQIKN…
CP001621.730	locus_tag=MMCAP1_0807 protein=50S ribosomal protein L10 protein_id=ACU79789.1 location=complement(950734..951231) gbkey=CDS	5761.4	4873.4	5240.2	436.5	465.6	450.2	3	3	3868.75	4092.41	4016.19	792.05	831.823	806.035	MMCAP1_0807	MSNSRPAHARKAEIVAEIVSKIKSAQGVAIAEYKHLTVAKMTELRVQALKQNIDIKVYKDSLVRRAAEELGLVDLIPFLTQQNVFIFSNEDSISAAKLVANFAKKNDALKLKAGIYEGKVVDTAGINEVASLPSKEELYSMFASSLLYPLRKVMAAINAVAETRN
CP001621.731	gene=rplA locus_tag=MMCAP1_0809 protein=ribosomal protein L1 protein_id=ACU79750.1 location=complement(951458..952138) gbkey=CDS	12427.5	10073.4	11232.6	2324.7	2525.8	2544.4	3	3	8345	8459.08	8608.89	4218.28	4512.5	4555.47	MMCAP1_0809	MAKISKRFKEALSKVEKNKVYPLTQALDLAKQTSTTKFDSTVEVAFNLNIDPRKADQQIRGAVVLPAGTGKTQRVLVLTNTKTKEAEQAKADIVGGEELINRIKNENWFDFDIIVATPEMMAKLGAIGKILGPKGLMPNPKTGTVTLDVAKAVDDIKKGKVEYRADKEGNIHLIIGKVSFEIEKLEENFKAVIDEIRRVKPQTVKGDYIKNVTLSTTMGPGIKVEF
CP001621.732	gene=rplK locus_tag=MMCAP1_0810 protein=ribosomal protein L11 protein_id=ACU79749.1 location=complement(952138..952566) gbkey=CDS	16813.9	10780.3	14249.6	2670.8	2791.3	2814.2	3	3	11290.4	9052.7	10921.2	4846.29	4986.83	5038.52	MMCAP1_0810	MAKKITRVAKLEFMAMQAKPGAELASLGINMPAFTREFNDATKDRAGDVVPVVITAYDDKSFDFVLKTTPTAYMLKKVAKIEKGASNSRTQTVATVTLDDIRSIAEYKMPDLNANTIEAAMKQVIGTAKNMGIKVTGMEDFK
CP001621.734	locus_tag=MMCAP1_0812 protein=glycosyltransferase protein_id=ACU79451.1 location=complement(954186..955562) gbkey=CDS	40.2	46.5	45.3	35.9	37.7	33.4	3	3	26.9941	39.0481	34.7188	65.1422	67.3534	59.7991	MMCAP1_0812	MINQHLNIVTNVFFYITLVIGIIFMLFLSSDWLFFMFSYIKNKKKLIKYQPKKNRAFAIIIPAHNESVVVGKLIDSIKAQKYDGIIDIYLVADNCTDNKKTYNVGVKKEVVVLERFHKTLKGGNFAIQHGLRYIRDNNLLDKYDCFCSFDADNLLDENWVYEVNKAYDFYSDIQVVTTYRNSKNYGDNWISSAYAIQFLKESDIINKGRATLNHSSYINGTGFSFTKKILEQTNWWDFNSLSHDIEFTQWLMLNKIKTGYTEDACFYDEQPIDFKSSWQQRMRWSVGFKQVWQIYKSKMIKNMFSSKVNKIKLWVNFTMISPVVITLVINLLFWLITSGLMISNYIINFSFNQTITHIQMHKQLFNLIIYIISTPLVIHLIIFINYFLWGFIIVARNKK…
CP001621.735	gene=galE locus_tag=MMCAP1_0813 protein=UDP-glucose 4-epimerase protein_id=ACU79598.1 location=955862..956860 gbkey=CDS	692.9	537.1	576.9	103	112.6	99.5	3	3	465.279	451.027	442.148	186.898	201.167	178.144	MMCAP1_0813	MNYLLIGGAGYIGSHVAEIINKTDNKVIIYDNLSSGSSDFIEQKSTFIQGDILDFDKLNDVFSSNKIDVVIYLAGLIKVGESVQKPLDYYQTNILGLVNTLKIMQIHNVNYFVFSSSAAVYGNNSRHNGFFYEDDPKEPCSPYGRTKYFGEEIIKDFAIANPNFHYTFLRYFNVAGASKSKRIGYLTQNNNKPTHLIPAISYFAFGLTDKFSIFGSDYNTNDGTCIRDYVYVCELAELHLLTAQKMVKENRNLYYNIGSGKGFSNLEIIKEFERQLGYKLDIDIAQRRSGDPDILVASNTKLCQELNYEIKTNIKDIVESEIAFRKAHLKNK
CP001621.736	gene=glf locus_tag=MMCAP1_0814 protein=UDP-galactopyranose mutase protein_id=ACU79407.1 location=956874..958061 gbkey=CDS	1165.2	645.6	759	203	206.6	206	3	3	782.426	542.139	581.713	368.353	369.104	368.821	MMCAP1_0814	MNTLKALPTNINSYDYIFIGCGLSTATVCAKLPKDKRILIIEKREHIGGNVYDHKKNDILVHQYGPHIFHTNDKEVFDFLNQFTTFNSYKNVVQAKIDDELIPLPVNVDSIKILFPNEAEDFINYLKEKFPNQEQVTILELSQIDKYQHIYQTIYTRIFASYTGKMWDKKIEDLDVSVFARVPIYLTKRNTYFTDTYEGLPTKGYTQMVLNMLDSSNIDIVLNINITKHLQIKDNQIYINDELITKPVINCAPIDEIFGYKYDKLPYRSLNIKFEELNNPNLQTTAVVNYPEHPKMTRITEYKNFYPEISNDKNTIISKEFPGAFEQNSKEFSERYYPIPNDVSRDQYNKYVEESKKISNLYQLGRLAQYRYINMDQAVRSALDFADELIKKYEK
CP001621.739	locus_tag=MMCAP1_0817 protein=conserved hypothetical protein protein_id=ACU79150.1 location=complement(959695..960624) gbkey=CDS	119.9	102.7	113.3	NaN	3.2	NaN	3	1	80.5122	86.2418	86.8354	0	5.717	0	MMCAP1_0817	MSFALEVKEEIVMHSFNDEQKLAYLSGFIRYSSDIIFSNNTSKIRFSTISNKIARTLLSFCRHIFDGQVEISIIQSQVLKKHKSFVLTLIGDTNKFLQKLRIYDQNNQKVYGFKVSSEIKDKTSILRAYIAGIFTAIGSVNSPKTSNYHLDLQFKNKIDANYFIDLTNDLGFEFKLLERNANRFICYIKKSIMVSDFLKLIDASNSVMQFENERISRDVYNSINRVNNFDISNQTKTLVTGQKQIETINYLKQTNQFHLLSKKAQVLANLRLEYPDYSYNELVEEMKKVGYEITKSGISNLFKTIEKLG
CP001621.74	gene=rpsT locus_tag=MMCAP1_0082 protein=ribosomal protein S20 protein_id=ACU79230.1 location=complement(100985..101230) gbkey=CDS	5421.4	5749.2	6214	1016.9	1169.4	1164.7	3	3	3640.44	4827.86	4762.53	1845.21	2089.21	2085.27	MMCAP1_0082	MANIKSQEKRVLTNEKSRLANKAFKSEIKTAIKKALNAKSNDDANKAELVNHAVSLVDKGLKKGIFKDNKAAREKSRLMSA
CP001621.740	locus_tag=MMCAP1_0818 protein=prolipoprotein diacylglyceryl transferase protein_id=ACU79689.1 location=complement(960637..962067) gbkey=CDS	145.3	213.4	185.3	117.7	116.4	111.9	3	3	97.5682	179.201	142.018	213.572	207.956	200.345	MMCAP1_0818	MKSKLKLKVDKRSIVTTSLWVILSILIISLIVLSSKHFRIDWNQNRGFDTVLEYGGVKDVYLARSDGSGGLRVYALTMTLGMLVAIGFSLYNFNKKDLSISELAIGVIFIIPCSLLGASFFGKLNADGIGRHANGATFWGLFAFWEGGLAIHGGVYVGSIVGLIIFYIIGRKTKVSLLVYADCIIPNILLGQAIGRWGNFFNHEVLGTPVAKIADNISAHTDKAIDQIFSTYLQTHSRPLFLPDFILKNCLSIYSGETQTINNITLENGNVVLLSPIFIYESIALLLGWFVIMFIIPNVWKLFVKPIDKNNNVYKIDYKFSFYQFFNPWLKSTQTKLSSKDAWKKALSDNVYENASEIYINKTSDLDNKKYWEKRVIESHLLNKLNNKNNYPITKAGVQ…
CP001621.741	gene=trxB locus_tag=MMCAP1_0819 protein=thioredoxin-disulfide reductase protein_id=ACU79546.1 location=complement(962076..963008) gbkey=CDS	1421.5	1054.4	958.7	230.4	248.9	232.7	3	3	954.53	885.427	734.767	418.072	444.675	416.624	MMCAP1_0819	MKNLTNEIYDVIIIGSGPAGLTSAIYTARAGLKTVIYEQSAPGGKLIKTDLIENYPGFETIQGPDLASKMYLQALSLNASVEFVGVNSIFKNADDIFEISLANGETKKAYAVILATGTQENKLGIKGEDELYGKGVSYCAVCDGAFYKNKPVAVVGGGYSAVQEAMYLSQLVDKVYLIVRRDVFRADANKVAKLKAQPNVEFLLKSQVKEIHGTEKVESLTITTPNGEKKLEVSAIFPYIGSTPLIDSVKHLCIENEKGYIPTNDKMQTEIKGLFVAGDVRDVPLRQIAIACGDGAIAGQMAVEYVQEIK
CP001621.742	locus_tag=MMCAP1_0820 protein=prolipoprotein diacylglyceryl transferase protein_id=ACU79276.1 location=complement(962992..964572) gbkey=CDS	25.4	25.8	21.6	48.1	48.3	44.1	3	3	17.056	21.6654	16.5547	87.2797	86.2909	78.9563	MMCAP1_0820	MSTTYFEWIKQHGDPSLARSFFQLIPAYPIFMFLGISSVIIASIICLKLKAIPLKEFEISIFIIVPFGILGATIFGKVFLPFYQHSNTWYRIFFFWEPGMSLFGSLLFGILAGIAWFLKRSKTTMISLWVYADCIIPNILLGQVIGRWGNFYNHEILGQIVDYNSLYWLPESIKNNLFYFPNFIEFHHLNNPTDLLVSHTNWWDFNSNTWSEVQNFVNNNNQTIKDVLNQKITYHQPLFLYESIANLFLWLIIMFIINNLTRWINHPQPWDLYPKAYPGWFNKQYKYLSEDQITNFNSIVPIKYKKLVINIDNKQTVVLKLSFYQAWNKAFYYYEPDNKKVSQLENQIEEFNKIKNKDKLNFQNTKSNCKHQLDLINKKYKFKLNNLNKNSLEYQKIIN…
CP001621.743	locus_tag=MMCAP1_0821 protein=HPr kinase/phosphorylase protein_id=ACU79429.1 location=complement(964583..965524) gbkey=CDS	452.2	435.6	512.8	217.3	205.6	222.8	3	3	303.65	365.793	393.02	394.301	367.317	398.899	MMCAP1_0821	MEKFTIKDLTDNLKFEIISGQDKLDTEIKSYGINRAGLELADYFKPFKDQSEWRATLMSTKESGYMLQFDEKTKIRKYTQLMKCGIPVLIITNKFKDKTLIKVAKRLNFPLLKSDYPITVQLVQKIQDIYDIYFSPTSEVHAALMNIFGTGVLIKGKSGIGKSELCLELIKHNHLFVGDDRIILTNKSNKIIGRVHPILKNLIEIRGIGIFDIVKSNGYQVIMNESPVELVIELVEYKEKNIDNSDRLGNDWQKTKILGVEIEHIQIPVSAGRSLVNIIESAVAQFKINKSKQFEDVFDVIHKRTKEFLSSKK
CP001621.745	locus_tag=MMCAP1_0823 protein=folate synthetase-polyglutamyl folate synthetase protein_id=ACU79864.1 location=complement(966299..967414) gbkey=CDS	95.2	79.6	91.8	12.2	9.6	14	3	3	63.9263	66.8437	70.3574	22.1375	17.151	25.0655	MMCAP1_0823	MISVDQELFPINQRLNKEVVFDKVLDELNHPEEFLKVINVVGTNGKGSTSFYLSKGLLKKYQKVGLFISPAFLYQNERIQINNTPISDNDLKSYLHKIDYLIKKYQLLFFEIWTLIMILYFKDQKVDIVVCEAGIGGIKDTTSFLTNQLFSLCTSISYDHMDILGNSIDEIIYNKINIAKPNTKLFISYDNLKYKDKINEQLINKNVELIYTDLYEDQIIYQQANKGLVKKVLEYLNIFQTNIFQLQPPLGRFTTIRTFPNHIIIDGAHNVDGINKLIQSVKMLNKEFIVLYASITTKEYLKSLELLDQNFNEVYICEFNFIKSWSIDNIDHKNKIKDWKKFLKNNTKNIIICGSLYFIPLVYNYLTNNKF
CP001621.746	gene=uvrA locus_tag=MMCAP1_0824 protein=excinuclease ABC subunit A protein_id=ACU79557.1 location=complement(967407..970247) gbkey=CDS	250.6	251.2	225.3	50.9	49.6	47.7	3	3	168.277	210.944	172.674	92.3604	88.6135	85.4017	MMCAP1_0824	MSTDKIIIKGAREHNLKNIDLELPKNKLIVFTGLSGSGKSSLAFSTIYQEGRRRYIESLSAYARQFLGGNEKPDVDSIEGLSPAISIDQKTTSHNPRSTVGTVTEIYDYLRLLYARIGQPYCINNHGQIKAVSIKEIVENIKQSTSDGEQIHILSPVIRDKKGTHIDILEKLRNDGFIRVIVDDQLRMLDDQINLEKNQRHNIDIVVDRIIYHNNDEINSRIFTAVEMGLKYSNNLIKIAFPNSNKQEKLFSTSFSCKVCDFVVPELEPRLFSFNAPLGACELCNGLGVSLEPDINLILPDLKLSINQGGVVYYKNFMHTKNIEWQKFRILCDYYYIDLNTPLKDLTQKQRDIILWGSDREIDIKIVTENNNKYEKYDFIEGNAALIKRRYFESKSEEA…
CP001621.747	gene=uvrB locus_tag=MMCAP1_0825 protein=excinuclease ABC subunit B protein_id=ACU79469.1 location=complement(970256..972253) gbkey=CDS	90.8	80.7	75.1	22.1	26.8	27.2	3	3	60.9717	67.7674	57.5582	40.1015	47.8799	48.6987	MMCAP1_0825	MFIANNKYKLVTKYKPSGDQNQAIEKLNKGIIENKKHQVLLGATGTGKTFTIANIIAKHNKQALVIAHNKTLAMQLYYELKEMFPENRVEYFVSNFDFFQPEAYIPSKDLYIDKDSRQNMELDMMRLSACNALLTRNDTIVVASVAALFALQNPLEYSSAFIELKVGQKIKRNELLTWLVRSGYTRNDIENQLGSFSAKGDVVKIVPGWVNNIMFRISLFDDEIESIHTLNTITNSILDNITTVTIHPAQSYITPQDKLKTICNNIRNELVQRLAELQSENKLLEAQRLEQRTKYDLESLEEFGFCSGIENYSSHLDFRSKGQRPYVLLDYFNNDFITIIDESHITLPQIRGMYNTDRSRKLTLVEYGFRLPSALDNRPLNFDEFNSLIKQVIYTSATP…
CP001621.748	gene=holA locus_tag=MMCAP1_0826 protein=DNA polymerase III, delta subunit protein_id=ACU79136.1 location=972538..973488 gbkey=CDS	142.3	66.2	108.9	97.3	92.8	103.7	3	3	95.5537	55.5911	83.4632	176.555	165.793	185.664	MMCAP1_0826	MYFFYSEDIFLLNNQIKKTIKELQQKDQYDVLSFSLIEDDFNTIYDNVTNLNFFSSKSIIVISDAYFVTEIKTNFNKNYSLNKLEIMLKNFNPNNVIIFTLNSNKFSKKLKIAKYIESNFNVKYLSLWDEKQTIKYIIDYLKSKNKIIDINLANQIYNLLPNDLQIITNETNKLANLKSELNRDIIKTNLNKYHNEDIFKLVDAFINNNIDKFIKLYHDYILLNDDIIGLISLLDTNLSFYRDVVILKNQFKSEEQISTILKSHIYRIKLAINNSYDINTLNDKIKIVYKIYKGIINWNINKKTLVEYMLIKNMKG
CP001621.749	locus_tag=MMCAP1_0827 protein=conserved hypothetical protein protein_id=ACU79398.1 location=973491..974957 gbkey=CDS	117.1	221.6	174.2	234.9	241.3	238.8	3	3	78.6321	186.087	133.51	426.237	431.097	427.546	MMCAP1_0827	MKELYLKLLNLSLNILKTDKLKYFILKNEEFKLKYLNLINDILTLETNHNQSLDDKVFAKTFAKAFILITKTTKQRFEANDEITIEQIENNYKQLVSYIVKEFKVVKSKLVSENEQISEEIINQNAILTDQSISKIESRLSKQEQLKEQKTSENSQKTATIISEEPILENQVNDQNQSNQQADFLNSFNPNMFANLNNADLPVLPSQDPRFYPYKGKPKFMPYLKIALCVLAVISTILLASSLLYLSYTTIDISSSTYAGIIESNKNWDQVIKNGDKEILKSWPLGISQIALMFKRAFGLPILIYMIPAILICTYTKKTLSNPREKYRIPLFPIIFFIMFFIGLTINLYEFTSIEKFKASWKVFLIGLTNKTDLDINKFFDELLKEHGLKFKLASALVI…
CP001621.750	locus_tag=MMCAP1_0829 protein=deoxyribonuclease, TatD family protein_id=ACU79825.1 location=975335..976132 gbkey=CDS	54.9	51.9	44.9	128.1	129.7	144	3	3	36.8651	43.5827	34.4123	232.443	231.717	257.816	MMCAP1_0829	MIDDNKIFDNHIHFNDESKYKDVNVKQLIEESNEHVTGWLCSSFDLISSKKAVEFSKEFENVFASIAIHPNDVQNFDNSVFDELEKLITNKKVVCIGETGLDYFYSKEHIKKQKEFFKKHISLAIKYNKVLQMHIRDQKDQFQAYDDVIEIIKDLNQITKVVHCFSANAIYAQKFLDLNCYINIGGAVTFKNAKDLQEAVKIIPLEKMLLETDAPYLAPHPYRGQVNHPKYIYLTALKIAELKNVDVKEVIRITTLNSKKIFNLN
CP001621.752	locus_tag=MMCAP1_0831 protein=ribose-phosphate pyrophosphokinase protein_id=ACU79601.1 location=976574..977608 gbkey=CDS	11478.4	8825.6	9882.9	2209.2	2261.6	2275.4	3	3	7707.69	7411.25	7574.45	4008.7	4040.49	4073.86	MMCAP1_0831	MDNKDIYVFGLSASQQLAKEVCHFLGVEQKVVKTTRFADGEILVESIDSVRGKEIYVIQSTSMPVNENLMELLIAIDAFKRGSAEKINVVIPYYGYARQDRKAKGRQPITAKLVADLLTKAGADRVIVFDIHSTQTMGFFDMPMDNFHTSQSLANEIVDTIIREKFDPEKCILVSPDYGGLNRVHKVDSYTANMTNGIAVIGKRRPEPNKAEVEFVLGDIEGRTCFIIDDMIDTGGTIISGAKALKANGAKDVYIFACHGLFNGPAKERMTQAIKEGIVKNVVVTNTVEIPQERQFEGLKIVSVAPLLANMIKESQEHHSLTEVYNKNKDEIQLKIQDFMNHKN
CP001621.753	gene=pth locus_tag=MMCAP1_0832 protein=aminoacyl-tRNA hydrolase protein_id=ACU79478.1 location=978034..978594 gbkey=CDS	565.7	465.1	416.8	239	246.2	234.6	3	3	379.865	390.565	319.444	433.677	439.852	420.026	MMCAP1_0832	MKVIIGLGNIGKEYEKTRHNAGFIAIDLLLEKYNYSSVKQEFNSLIYTTMINNQKVLLVKPLTFMNNSGIAVRQIINFYKIDLNDLIIIHDDKDLNISRIQFKKDGSSAGHNGIKSIINNLQTQNFYRLRIGVNQVPKEWKIVDWVLSKFSDEELNLLKQSFIDKIEFINDFTNNKTFIYLMNKYN
CP001621.754	gene=rplI locus_tag=MMCAP1_0833 protein=ribosomal protein L9 protein_id=ACU79853.1 location=978715..979158 gbkey=CDS	2838.6	2387.6	2384.9	742.7	815.4	774.7	3	3	1906.11	2004.97	1827.84	1347.66	1456.76	1387.02	MMCAP1_0833	MKVIFLKDVPNQGKKNEIKEVSDGYARNYLLPNQLVKIATNNSIQTLKDHLKADQEEKELAKAQTKQIKKTLEELTLHFKLQTNDDKVFGSISSQDIVNQLKDVHRIEIDKKKFIHFKNINKIGINYVKVKLDFGIEAIIKIDVKEV
CP001621.755	gene=dnaB locus_tag=MMCAP1_0834 protein=replicative DNA helicase protein_id=ACU79737.1 location=979161..980477 gbkey=CDS	1379.9	1036.5	1136.8	181.7	180.2	167.3	3	3	926.596	870.395	871.266	329.703	321.938	299.533	MMCAP1_0834	MKQELTVAELLYAERFVLGVAMSFSNALADIVSVLKVDDFSIPANKYIYQAIIDLNNKNKSISPISVINRLEAINKLEQVGGDVVVYEIAAENYTDQGLEEYIDIIHKAGVIRKLDIVIKELEIKRNNSNTDVDELLKVAQTKLLDIDLSIKRFEIEPIGEVAKRVVEKIKELEMKAEIISGVPTGYNYLDLVTSGWQESDFIILAARPSVGKTAFSLNLAFNAAMQKYPVAFFSLEMPAEQLTQRLFTRLTSVDSTNLRTGKGLSKQNWEKIQIAKEKLEEIPIYIDATPGISTQEIRSKLYKMKRDHNIKLCVIDYLQLIVGSQNKDRQNEVSEISRQLKQIARETSIPIICLSQLSRRAETREDKRPMLSDLRDSGAIEQDADIVAFLYRDDYYKK…
CP001621.756	locus_tag=MMCAP1_0835 protein=putative liporotein protein_id=ACU79263.1 location=980544..981851 gbkey=CDS	500.6	828.1	681.8	1473.3	1459.8	1391.1	3	3	336.15	695.392	522.545	2673.37	2608.02	2490.61	MMCAP1_0835	MKKLLGILMFGSVTIFPTLTTISCSTTITHTIKTSFNDGTQVEKFVWKDNRYQSDGQSSNIQDITNSLNGTTNAYSKTVTDVLNLFTRNIQEVRNLKESYDLFRGKAEDTSVVGYYTGANSQRQKISQQDFYKKLDDSHTHISSLKGLLQLREFVNDNKNKTAVDSWKNSLKIDADEVKKWSDEFTKNLDNIVNSSTDNKIKDIKLVSKVSKTSSSFATFEQDVKTAPTTDKGNIELKNDNNGKVVGDIKNLKDHNPYVFGTSPVNDPFGMNVIGENKDPDISKLKPTINYSTEKLTKKDDSYINLSNNGNNNNQFVYNINQKWELSSAHNFYYMSPKEETLELKITHSIENKNFTFYVQFGGLRKIYTPIVEAYTPKDSNSADKRYSFVGWTFNSYRF…
CP001621.758	gene=cysS locus_tag=MMCAP1_0837 protein=cysteine--tRNA ligase protein_id=ACU79590.1 location=982928..984253 gbkey=CDS	10.3	19.7	36.7	38.8	33.5	33.1	3	3	6.9164	16.543	28.1276	70.4044	59.8498	59.262	MMCAP1_0837	MQLYDSLSKTKKNLNKKTINLYCCGPTVYNYIHIGNARPVLLVDVLIRYLKSRNIKVNYLQNITDIDDKIILKALDNNLNELEVSQKYTTAYLEDLKSLNINQPDKIILISQKMNEMIDFIKNLVDINAAYVLDGDVYFDIKKYENEYCKLSGYKLDELISGKRIEIDSKKHYSLDFSLWKKTDIGIKWNSVFGLGRPGWHTECVLLIDEYFNHQTIDIHVGGIDLKFPHHENERIQFIAKNNKELAHIWLHNGHLQINDEKMSKSLGNVILVRDFNKQHNKNTLRWIFLTTNYTQPLNISDDLIYQANKFFEKLTNLSKKTIQFIIKNDLKIQSINSSEYINKFNEYMEDDLNTSLVLSLIDLLIKQINKDIVDKNLDNFNLLIGSLNYILDVLGFNN…
CP001621.759	locus_tag=MMCAP1_0838 protein=RNA methyltransferase, TrmH family, group 3 protein_id=ACU79720.1 location=984255..984989 gbkey=CDS	277.7	206.2	209.2	20.3	18.3	21.6	3	3	186.474	173.155	160.335	36.8353	32.6941	38.6725	MMCAP1_0838	MNSNLIYGKHVVFELLKKHQNMVKEIWVKDLKILNEFDLKNTKIKVNVVSENKLDQLLETQTQHQGIIAQIKDYNYTPFNQLINDLNTKEKSLVLILDQIHDPYNFGAIIRSCSLLNVDGIIILDKKQVQVNSTVLKTSSGSAFDIKICKTNNLNNAIKILKNNDFWIYATNLNQNSTDMTKIDFANKTAVIIGNEQKGVSELLTKNSDFNVYVPSNKNIDSFNASVACSIICFWIANYLNKLS
CP001621.76	locus_tag=MMCAP1_0084 protein=putative liporotein protein_id=ACU79780.1 location=complement(102416..103828) gbkey=CDS	49.4	37.8	25	8	7.5	17.3	3	3	33.1718	31.7423	19.1605	14.5164	13.3992	30.9738	MMCAP1_0084	MKKLLTILGSVMISASTATLVIACKVSDNKIIKTTKKTDSTTKDLTKPNNNNFENPNNNSNDQKNSNIKKENEPIEVDKNDVKTLKLKIEDLKSQKLKIEAEYNKKELELKNKATKTITEAKNNLEKTKKSTNKKLEEIEIKISQFENDLIDENIEDEMAKSKETIDDINELLKESYELVKQYSEKEKQYDKEANRAKDLETRIKNLRQYISERKSLSASESRFNQLIRETLTNHDNLIKPKKERLKELESKEKALESDRKDANDPNNSSYEFYYNFNKTRYQILQELVNEISEVKKEKTELESLEKQLEKRKQKLIDDLVIKKITARQVKTTLLHAEKEFEKITKEKQEVDNTIRKNSSEAVRVKKELETNRNDVQNLEDRLKDANKIQSNLMKKLDN…
CP001621.760	locus_tag=MMCAP1_0839 protein=preprotein translocase, SecE subunit family protein protein_id=ACU79328.1 location=985211..985534 gbkey=CDS	353.2	438.8	378.1	912.6	896.7	828	3	3	237.172	368.48	289.783	1655.96	1602.01	1482.44	MMCAP1_0839	MEKEINIDQVEQIEQVEHIKPKNTQKISKTTKKKLKVKKEKEPKNFRTWFKELPVRMSKEFFKIRWTGSGSLGKKFLIVIIFMSIFALLFFGVDVVIQYLFRLIKAI
CP001621.761	locus_tag=MMCAP1_0840 protein=transcription antitermination protein nusg protein_id=ACU79393.1 location=985551..986192 gbkey=CDS	1944.4	1672.1	1992.4	406	454.5	460.9	3	3	1305.65	1404.14	1527.02	736.706	811.992	825.192	MMCAP1_0840	MTYEEIKQLEDEILEAKGQWFVISCQTGHEEKVLGDLQQKIKSASIEDEVFSIKISKANLVSKSGKSSIKNKFPGYIFINMIMSEKAWFLIRNTPGVTGFIGSSGRGAKPSPLTTEETLNMLVPNLEEIEQAHEQEQQEENLKNEAVNKKELFTANFKVGDVVRVKSGIHENEEGTVKDMDFSKGVAFVAIEMFGRWTTLEVSFKNVEPIKEY
CP001621.762	locus_tag=MMCAP1_0841 protein=hypothetical protein protein_id=ACU79723.1 location=986632..992553 gbkey=CDS	94.9	82	68.4	133.8	161.5	145	3	3	63.7249	68.859	52.4231	242.786	288.53	259.607	MMCAP1_0841	MPKINFKKYVWHKYAISASLIIAATTAILGSAYKYSNTSVEKLGRKNFSDEESFKNAFIDPNALPVTQFSEIHNNKFKVDYDPLKDVVKVNGKELSVDKYLDQYYRKYHALPYLNIRYGSFNFYNQYIEAVSPQEFFKFTKWFMKNVSWGPEIITLKSFSIVKGVEMNGNSITLGAHSNKNKEETTIKFYPDAFFGTLPIYSSLSGRGNAHESLTYKLNQQVLTKKDLESFLTNISNYNSLANLSQQTIDKSYFRGITNVSFLKGQKVFAYKQRNWYKNFSNSFSKLESKRLEDKSDYLFIIPASNLNEAKNKLEIKLSEYKKNDKYNLFKNINPKNVVLEEKTIESAEVKQDQVQPNGNNKVIDKKLLITFNDNTKYFIHNAFGDVLTEQINNEKKTT…
CP001621.763	locus_tag=MMCAP1_0842 protein=bacterial extracellular solute-binding protein, family 5 protein_id=ACU79602.1 location=992563..995520 gbkey=CDS	66.7	66	53.3	143.7	150	143.2	3	3	44.7887	55.4231	40.8502	260.75	267.984	256.384	MMCAP1_0842	MKKITKFSIIFGGISAAILATSIPLIVANTRSKKEVRDYDLGLVAEPINSLNYIKFASVSKVLPSLVEAPLKSGPSENLKRILSIPEIPMGAYTNDIKLTDSDIEKGITSIDKYYTTKEPSANLTSRFYALDGFGNTTGTLSADKSTYHPASILLSNNKVQSANILLNNGQSRWSNNDEVVADDYVDALHYILDLSTGSQRLTNILQRKFANAQTVVDLQNEYIRKFGVTYTNPFQYPKIKEINGKYLYDVFNEEYKKNFYASQIDHILKSSSKYKNKALSKQEIEQLQKEEKQVLDKLQNAIKKLGLYSGRLYWNYSNREILSSIPYSPDFDPNADETIIMLPNLEYLNPNLSSEQRKNTLQRKAVKIKKYLFSDPRQKFSKEFEKLLQQSRELKGHI…
CP001621.764	locus_tag=MMCAP1_0843 protein=oligopeptide ABC transporter, permease component protein_id=ACU79640.1 location=995520..996593 gbkey=CDS	1.5	6.2	9.5	25.9	25.5	31	3	3	1.00724	5.20642	7.28099	46.9968	45.5573	55.5022	MMCAP1_0843	MKSKTTSNFVDDLSTLPKNAIEHKQHVDFSNKIKYDIAWHKRIFNIKTPWISSLLRTIWIFIEFFVVAFIVITATFFLINSVPGGTGLTAGLDEAAKAAVEEHYGLNQPLLVRYGIYLYNILHFDFGISLSVFPGEKINDFVWVRFYKSFLIGIFSVMLTLLIGIPLGVYVGMNPDKLPDHIATVLVSIFSSIPSLVFALWLLLLGRSAGIPYIFDQANLASYILPGFSLSLGSIIVYIKYIRTELNRELNSQHCKFIYLKGITKRRFVWTHALKPALFPIATFFPVVIFGSFIGSLFIEQIFFITGSGGLLLNAITSKDFNIILFMVTLFSLLTILSYTCRDALYKVIDPRVRKKA
CP001621.765	locus_tag=MMCAP1_0844 protein=oligopeptide ABC transporter, permease component protein_id=ACU79550.1 location=996595..997605 gbkey=CDS	20.6	26.2	25.9	11.6	9.1	6.1	3	3	13.8328	22.0013	19.8503	21.0487	16.2577	10.9214	MMCAP1_0844	MTKLSQLFKNWHYRKKRAELSPTNISGSDLAPNKILRPLAHQQWQLVGNLLEFSETSKMHNQKNAFIEFFYRFSRSFAGVFGFVILATLIILSLIIPLTTKDPLIIDVENRNETFFTNGHILGTDALGRDLWARLWHGLRYSLTLSVVATFIQVIIGLFIGIMMGHFRMFDKLMTFVIKIISNVPSIIILITITIIIKPTFWVMVFALSFTSWTGIANQMRSQVLRAKSFEWVSASKVLGTPTYKVLLNYLPVLIPLLITEIVFHIPGIILSETSLAFIGLSIPNVATLGNLISDGSKNFTVFPRYVLIPSFMLILVTTSIQLMANSVQDTLLRQR
CP001621.766	locus_tag=MMCAP1_0845 protein=oligopeptide ABC transporter, ATP-binding component protein_id=ACU79859.1 location=997613..999058 gbkey=CDS	103	82.4	95.6	85.4	87.8	89.1	3	3	69.164	69.1949	73.2698	154.962	156.86	159.524	MMCAP1_0845	MKDQIKNKQGYSKKFKTPLVYNNMPIPLDLFEIKDKNNKSVIQVFIDYWKHKYNVVKNLFNKNKDEQNTDIFKNVEQEEVFGKLVNVAAHIDDVYLSFKNPANPKEKNVVLRGPSLKIYEGKVHALIGESGSGKSVITSLLYGLTGSNSVIESGSVKLYGLEVHNFNEYQWEKSKLRGRVISAVFQNPMSILDPTMKIGNQIIEGMLVSKIVQTKKQAYEQALNYLKLTKINNPEVIMKKYPHELSGGMIQRVAIACIISLKPKILVMDEPTTALDPTVQALVLDVIRELQEQFKIAIAFITHDLGVVASIADFINIMYAGQIVESGTKEEILLNPQHPYTWGLITSMPDYNKGEKLQVIRGSVPANLNKIQGDAFAVRNDYALDIDFYEEPPVYQISP…
CP001621.767	locus_tag=MMCAP1_0846 protein=oligopeptide ABC transporter, ATP-binding component protein_id=ACU79688.1 location=999051..1000373 gbkey=CDS	88.5	101.5	95.1	196.4	193.4	193.9	3	3	59.4273	85.2341	72.8866	356.377	345.521	347.157	MMCAP1_0846	MNKYYIEKQPFKKALYRSIRKGTNEMLNAYKNRKTVVEIRNLDIVYGFGAKEFTAIKDLNLNIYDGEVLGLVGESGSGKSTIGRSIIGLTPHSFGQIKILDRIIPKNLEKTNKFSKKHKDIINFMVNKVQMIFQDPTNSLNPLKDVKTVVGEGLSNTKNAKLIYITDFDEKVYNNITSQIKDSDKLTNKIFDYVDQMTKLTYTLDNSYKVVYEDLLNVLNNLKANDKEFYTPIYNRLVESQLQRQTLIKLSEEECKHRLIVEILKQVGLDESVLSRYPLEFSGGQQQRLGICRSVVLRPKLLIADEPISALDVSIQAQVINIFNELKKKYNLTILFIAHDLRMVEYISDRIAVINKGVLLEIGPTDEIINNAYHPYTKSLLDAVPSIENEKGSLIGSIY…
CP001621.77	locus_tag=MMCAP1_0085 protein=putative liporotein protein_id=ACU79082.1 location=complement(103979..106228) gbkey=CDS	184.3	178.8	118.3	128.5	127.3	130.7	3	3	123.757	150.146	90.6675	233.169	227.429	234.004	MMCAP1_0085	MKKLLTILGSIMISTSGAALVIACKTPSTKQPTNSDKNPSNNGDSSNPSGSGENKKPENTKPGESDSNNSTIPVDPKKPDQPDTPKPKPGEKEKDETKPNETNPITPVQPKPTTVIWNSIFRDSPTGADINLNPTKEQIEKEEKRLEELVKNILKDNNKINDQAFNKFVKDHKDWWNKFSKDLKIQIYRDSISGLDINLNPTKQDLEKEEKRLEEWVKEYLDKNKRENQALFDYLIRTKIDEIFSDSPTGLDIKIHYDKDSVKRAEKILDEWVKIYLEKVEKYNKNLFKKHIQSIWDNRVYNYSPTGADINFYLTQEQIDAENKKQEEIINNELQKAKERNIRIHKEGITKLKKAIDEFNLAKAKIENETNKKEKDLISTAEKTITEAKNTLETTKEST…
CP001621.770	locus_tag=MMCAP1_0849 protein=lipoprotein protein_id=ACU79625.1 location=complement(1001902..1002408) gbkey=CDS	NaN	8.5	NaN	13.2	11.7	14.9	1	3	0	7.13783	0	23.952	20.9028	26.6768	MMCAP1_0849	MKKLLTIFSSISLIAMTSATAIACSNNNKKEDKQSSTTKTTDNKEKEMNKSQETTSSSANMNNTQNSNSSTTVNSTPVNSTTSMSAQPKEETFWKREPLIFSELDYVSEYFKKRESIKETSELVLSNSEGVKGWTGEPKTETPIRDDGLAETQDLILENSNSLMNSTR
CP001621.774	locus_tag=MMCAP1_0853 protein=conserved hypothetical protein protein_id=ACU79433.1 location=complement(1004115..1004834) gbkey=CDS	66.1	55.7	48.9	5.7	14.5	13	3	3	44.3858	46.7738	37.4779	10.3429	25.9051	23.2751	MMCAP1_0853	MIYIDFDWNIVNIWDEDELIKSEKALILRDLLTKNIIAIGNDTDEEMRKPKNFLSINCTENRKITSFEDLEIRIKKLLEDNKIKEYKLVNRYSEYIPNLNTINEIEFLKKISKDYDYYVELRNDEIVIFNNLTNEIKTIKKGRAYLQHYIQSIFYLNYQATLNTKKSWDLIKLINQKQEIKTVVCRSFITGTDIDIQILNKDFLTNVFQQVNVEVNNLLDLTKKIKYDQKYMENFNCVR
CP001621.775	locus_tag=MMCAP1_0854 protein=conserved hypothetical protein protein_id=ACU79161.1 location=complement(1004834..1005343) gbkey=CDS	96.2	94.4	85	10	31.7	10.7	3	3	64.5978	79.2719	65.1457	18.1455	56.634	19.1572	MMCAP1_0854	MPCENIIEKIYLGDQFSKRLVNPDKELKISNVFYNILKKDTSEILYQTKNFVLTKNKLAINLLDSHDVRDFSDDLFIPAIKFLIENPNDKSLYTHCQLGISRSASTIFMFLVIKGVIDNNLSFEQALEKYVKDIYPFMKVNLGVYTYLKNNYPFYNIKSKLSTDWKDLK
CP001621.776	locus_tag=MMCAP1_0855 protein=PTS system, iibc component, putative protein_id=ACU79761.1 location=complement(1005343..1007043) gbkey=CDS	30.6	35.3	33.6	10.6	10.2	11.5	3	3	20.5477	29.643	25.7517	19.2342	18.2229	20.5895	MMCAP1_0855	MESNLKTKNQSKWKYLFINIRSNLETFGRAILVPVTVIPLLALIGAIGYTGQAILAQVYPKGGAKPPVGLELAINAIKDLGMIAITNIDFLVAIGLAAGLAKSEKVSAALSGLMAYAAMHLATALILKIIYGDPSKTVIVFEGVKKTVKDVFGLKIRFGVLSFQYSAFGGMLAGLLGYTVHKYTYKLKFPEVLSFFGGPKFSPVASTLAGWVFGLGLGYIWIYISKGLTYSGNSLQKLGAFSPFLYYSLNRALIPFGLHQVLNFFIYYTPVGAQWIDPNGNQITGILNVSLAKLAFQQKITAQDTWATNGVFVNNMFSLTGAALAMFFVIPKANRKVYGSSIISAAIVSFLSGVTEPIEFTFLFVAPLLYVFHALFAGLQNMLMYLFNFGSVTTRGSGI…
CP001621.777	locus_tag=MMCAP1_0856 protein=PTS system, iibc component, putative protein_id=ACU79865.1 location=complement(1007120..1008832) gbkey=CDS	151.8	185.6	172.9	75.4	76.8	70.1	3	3	101.933	155.857	132.514	136.817	137.208	125.507	MMCAP1_0856	MDSKSKFSKDSMKSWLSAFRAGLEQFGRAILVPVTVIPLLALIGAIGYTGQAILAQVYPKGGAKPPVGLELAINAIKDLGMIAITNIDFLVAIGLAAGLAKSEKVSAALSGLMAYAAMHLATALILKIIYGDPSKTVIVFEGVKKTVKDVFGLKIRFGVLSFQYSAFGGMLAGLLGYTVHKYTYKLKFPEVLSFFGGPKFSPVASTLAGWVFGLGLGYVWVYINKGLYASGEGLRKLGAFSPFLYASAERALLPFGIHHVLNFFVYYTPIGARWVGPDGKAIEGAINVALAKLAAGQQISARDDTWVVNGTYVTKIFSLSGATLAMFFVIPKANRKVYGSAIISAGAVSMLSGVTEPIEFTFLFVAPVLYLIHIFLSGFQNMIMYLLNFGSVTTRGSGI…
CP001621.778	locus_tag=MMCAP1_0858 protein=putative transcriptional regulator protein_id=ACU79646.1 location=1009140..1010528 gbkey=CDS	15.3	18.6	19.9	10.5	0.3	0.5	3	3	10.2739	15.6192	15.2518	19.0527	0.535969	0.895196	MMCAP1_0858	MKDKNIEYKYDISDKNNSFKREIVAFLNTKGGEIHLGVTDDGHIDKQQILKNRKQWEQTISNWLVDSFYPDVLDFITIDPNSFPFIIKISEGRSKPYCYKTKGNYDFNNIYIRFSSKTVKASVEQIKKMLLESVSTQCDNSLISTTDLTFNYVEQKFNNANIAFNKEALSLINKNGIYTKTALFLSDQNPLITKFAVYQSIDNKVFLDRQNLDGSMIKQIDTLLYLCNLKNETKTIITNQAKRIEIKNYPESSLREIILNCFCHRDYLSTEDIKVEIYSDRIEFYSPGSFPYNLTLQEAKNGWSYKRNFTICNILYKLKFIENYASGIRRVFDEYKEFEKQPEFFIEPSFVKVILYNRNFDTKNDNLKTNLIQTNLISDQTINDNLKPIITSKKIKKEQ…
CP001621.779	locus_tag=MMCAP1_0857 protein=SIS domain protein protein_id=ACU79505.1 location=complement(1010515..1011330) gbkey=CDS	74.6	81.6	72	2.9	20.6	8.8	3	3	50.0935	68.5232	55.1822	5.26219	36.8032	15.7555	MMCAP1_0857	MNIIEKIKQNKINLSPQELKVCDYILTNISDYHNFSVKSICKKLNVQPSVITKTLVKLEIGGLKQLISYLENNSNFFKDETKVSFDNIIDEFENRLEDSLKQLKTNLDINYLKEVVCKILSSKKIILFCTGKTKILANFLFFQLLELNLSVELFSNLFDSRAYNVEQACIIVISTSGNNSKINRYLNFISKRKPNTIIGITSSPILKTDIEVDYHIHGSENNFFINDNRSNPMIEKYKIQYILDLIFLLIINQIDLNNLKFQEKVKTTNLV
CP001621.780	locus_tag=MMCAP1_0859 protein=DNA topoisomerase domain protein protein_id=ACU79316.1 location=1011518..1013479 gbkey=CDS	1126.1	922.9	916	135.1	114.2	127.1	3	3	756.17	775	702.041	245.145	204.025	227.559	MMCAP1_0859	MKVLVLLESPSKIEKIKHYLEESFPENQFVVLASGGHINSIADKGAWGLGIDLETMQPDFVIDSSRKKIISQIKKEGKTADLIILASDPDREGEAIAYHLANLFKDHTNIKRITFNEITSEAITNAFNNLKDIDMNLVNAQISRQILDKIIGYLVSKSLQKSTGLMSAGRVQTPALNILTTRDTLIKNFKEVLYKKIFVIESKRAINLSLVKDKNNVLVNTEKTYYIDEKQAKAIVDELGEVYRCTDYKSTAYETRSFKPYSTAGLLQDGFTKLKLSTSQITLAAQKLYELGYITYIRTDSVKYSSQFISEVKDYISKNYSSDLFKAPVVGKKDQNSQEAHESIRPTNIWLTPEKASLEIEDNLLKRVYNLIWWNSIKSLMKGPSGFNHRWTFNNNGYE…
CP001621.781	locus_tag=MMCAP1_0860 protein=putative liporotein protein_id=ACU79078.1 location=complement(1013626..1014351) gbkey=CDS	7.7	16.5	16.9	51.4	60.6	48.4	3	3	5.17051	13.8558	12.9525	93.2677	108.266	86.655	MMCAP1_0860	MKKLLTVLGSLMIGTSSAALVVACNNTNPSQPANKDKDENPSNGGGSEKPGEKDEDKKPGEDKKPDVEKKPTDNYNPKTYPYTIFNRHFVSGNSSSWVGTIHNSSFVNGTPAVGPNGEITPKTPNNTLSLDNVYYDSATGHDIARTYSDKRDAEEEVHRKHHAESSSKITELLFDDTIAEATYKYDLEKRKKESAEFSEAVVRNSDTINGRANWRGVSEEGRRAAEEASDWVTRNSDAINK
CP001621.782	locus_tag=MMCAP1_0861 protein=conserved hypothetical protein protein_id=ACU79172.1 location=complement(1014752..1015636) gbkey=CDS	11.7	15.5	16.4	11.6	15.4	13.5	3	3	7.85649	13.016	12.5693	21.0487	27.5131	24.1703	MMCAP1_0861	MKKNKKYLYVIISLISILLIGLVTYFSFSNKNKDVQKIELKLENNKAKWDLFLNYDYVDMLLNLVYKDSKEKDKYIQEQKLIDTNKSLNNLKDYLAYSNGVVANYSYDGAESGQKEKEPLLRKENSKKLDEFLKNNWLWTLFNLDKFEYVLFDISDQFINQRDQASINSQKDSLNYNAFRKIKSNEMQQVVLEQKNNDDYVLYLLSTDWNIFTIDINKKNEKWEVDINSYIHIHPDFYKNLYDPFLHFDLKQYVKGEILHLKNAKDQTHTKYNEQFGGKPLRLALINVDIHTDR
CP001621.784	locus_tag=MMCAP1_0863 protein=putative liporotein protein_id=ACU79402.1 location=complement(1016440..1017789) gbkey=CDS	2	18	11.1	22.9	21	20.2	3	3	1.34299	15.1154	8.50726	41.5531	37.5178	36.1659	MMCAP1_0863	MKKWLLSSLVVFLIPTTSCSIKNNNKEKIINKQEFKFYDNKNINQLLDLYIKDQQQKQLYTLKQENISDAKVSDLKFVLTFYTVFNSNRSIESVTTHYQQVALKAKKTLQNTLTNDWYWLLKHINQFDFNFNPFDDRYKHFKLEQNLIDYVYKTHNNLLTKINDKYPSEIFVFNINDIEDLDSFKNKQAIYLVYDKSKVLKILKYEINDKTYFQIFTDLLWFKDYKNLKEQLEQIENKIFEKRNDKLNEALKEYIEELEDSEDEEANDQINDKLQDIWDRFIENCQNIISSINGNLMRQFERSLRMPNNTFLRTFTNKDESVNKWKDEQLKNINHFLEKNSNTIMNSEKIKKELVETVNKISEELNSIDFPNTNKNENNEGKIKKDFLEKYKLKNDDLA…
CP001621.785	locus_tag=MMCAP1_0864 protein=ABC transporter, ATP-binding protein protein_id=ACU79293.1 location=complement(1017767..1018471) gbkey=CDS	195.8	148.7	151.6	329.8	239.7	344	3	3	131.479	124.87	116.189	598.438	428.239	615.895	MMCAP1_0864	MDDILKINHLTKIFTDTNRGVNDINMSVKSGSFHAFIGENGAGKTTTIKTIIGAFSKYEGEVLINNINIKKAQAKSYIGYVPEVAIFPKELTTIQYLTYLGFLSKLDKKEVEHKIKEFLEMFNISNLINEKPYNFSSGQKKKILLIQALLHNPKLLILDEPAANLDPTARYELFSFLKKINEKEKISILISSHNLSEIDKHVDSLTLIHKGKILYSGVKTKNLEDIFYEKVIAK
CP001621.786	locus_tag=MMCAP1_0865 protein=ABC transporter, permease protein protein_id=ACU79245.1 location=complement(1018473..1020344) gbkey=CDS	20.2	25.5	25.1	41.6	42.4	39.6	3	3	13.5642	21.4135	19.2371	75.4852	75.7502	70.8995	MMCAP1_0865	MKISIFKYSQFAFFTILYKKSSYLLPIFTLVFSTIIGLIFKFVIDEKYLGLSSYLYIFLLLIITVIFSAIKSLNVFKDLDQEGLEIISFSKPISRNNLILGKLLCLSFYGLIWSSILLISSLVSLYANYSFINLILTSLLLWFVGLITYLLISLITAILSYKLTQKIALTIPLVLFIFLSIIGMVLSSNTTSNLNKVGYYLNQKYPYHHSNNQLNSEAYFINNKDELLVIPNGSENKEFNDEQVKYLKKATEVSNNSSTLWTTYSWFSIPYQLINVFNFKNKNIFNQFSNSSSNLNNFIYYNDLDDISYKYKLVKNASYNKYSVLKDDKLVQMYAVPGLLQSHTILSSNNINNKNINSRSRDIIYARKNANDINTNFVEDENDFSRENNLVGVLKWNNV…
CP001621.787	locus_tag=MMCAP1_0866 protein=putative liporotein protein_id=ACU79724.1 location=complement(1020483..1021370) gbkey=CDS	64.1	58.2	46.1	71.6	73.7	69.5	3	3	43.0428	48.8731	35.332	129.922	131.67	124.432	MMCAP1_0866	MFKLKKSLSLVLLSIFPILSFAAISCSNNKNQNINNLSIKKDEKKDSWNQFVQREYVNQILSIAFDNDNEKIKQYKEEQFSINDKEMLATLNKYLTYANNINAGYGNDGDNITGDDPYPTREYGNKLYDFFNKNWLWTLYNLDKFNFVLYDVYNGFSGNVSKLGEEAEKNAVDYGLFKKIHSNNISQFAITKSNSISGKLVYYNFYLLTEDWNILEINIEKNPDKFKFIAYTNIYPRLTKNKLDREVFILDEYANAVLSVAKDRTSQAMNNFNAKFGGKPLRYVMFEVNSKYLNK
CP001621.788	locus_tag=MMCAP1_0867 protein=conserved hypothetical protein protein_id=ACU79537.1 location=complement(1021372..1022202) gbkey=CDS	27.1	31.3	32.9	78.4	66.7	70.1	3	3	18.1975	26.284	25.2152	142.26	119.164	125.507	MMCAP1_0867	MNKNKKTLINISIAFAILPFLVLPSLFFINKKSNNLKLVRPPGFDVYDNLNNDKEAKTVKLLQSLVDDVFKDSKLDQQEFVKSQKEKNDQLISKAKELSSEYLKNSNEENLKKLKNFYSENWLFVFQNLSKFEMKFIDFWKLKANNGSELHSKEFLDDIKKREKPKDNYYFSNNNIDLIKIGKENEDLPNLTVYYLRKDRFIIRALLTNNDKKMTIDKFILFNDSIISRINIDTISDAIHLGVFHNQKDAFTSTFEKHIIKEYGYPWDGILLWKGK
CP001621.789	locus_tag=MMCAP1_0868 protein=lipoprotein, putative protein_id=ACU79628.1 location=complement(1022189..1023382) gbkey=CDS	59.9	56.2	51.4	251.3	259.1	215.3	3	3	40.2225	47.1936	39.394	455.996	462.898	385.471	MMCAP1_0868	MKKLLIGFSSIFAFLTVSCSTSTPKVNPTINKNENKLYKNKYVSELLNLYLSDSKLRDSYINDQENVSDSKFSELKYGLTFYPIFIHRSLDYHVGQHYRVIIQKSKNALEQTLKNDWYWVLDNITNFKYNFNPYGDLYNDFDKDEDLFNQVEKDLGSLISSVKNKNVQKIIKINLDEVVNEKIKDNYLKKEALYLIFDNNKAIKIWKYENQNKTEFLMTTDLFIFKDTNNLENQIKQLENTIFEKRKAEYDNNLKNINKSIEGTKKRKEKTQQEIQELKEKIKKLEEANNSASTSLALTSNAILLSAPKDDKKKEPTLEELKKNLEKKEKQLQQFDENVKKYEKNIEDLPQKSNDKKFLEFHATDQYNERLKESLNQINKDGWKIVRFSMRGIYEQE
CP001621.79	locus_tag=MMCAP1_0087 protein=cell wall anchoring protein protein_id=ACU79501.1 location=complement(107956..108369) gbkey=CDS	1120.8	1216.9	770.1	251.5	278.8	261.5	3	3	752.612	1021.89	590.22	456.359	498.093	468.188	MMCAP1_0087	MKKLLTILGSIMISTSGAALVIACKTPSAKQPTNSDKNPSNNDDSSNPSGSGENKEPENTKPSESTTPTNPINPKQPNKPDTPKPKPGEKDENETKPKEPITPNEDKKPDEPKNPETKPNGSTTPVIPKKPDQPVIP
CP001621.790	locus_tag=MMCAP1_0869 protein=ABC transporter, permease component protein_id=ACU79591.1 location=complement(1023401..1025296) gbkey=CDS	37.1	45.4	70.2	82.7	83	78.5	3	3	24.9125	38.1244	53.8027	150.063	148.285	140.546	MMCAP1_0869	MKLNAFKYSQFAFYTILKKKSSIILPIFTLISSLIIGLILKFVVNNKYVELLSFLYVFILITLTVVFSCIKALNIFKDLEQEGLEIISLSKPLTRESLIIGKLLCLTFFGLIWSLTLLISGFLSLYAIYSFLYLFLTSLLLGFVGLITYLLFSLFTVLLSYKLAQKISMIIPFVLFVPLSLIGMILSINVKSNVDQASFYINKEYKNHHSGNEVNVEPYYLNNHKDELFLIPNGVNNKEFSIEQVKYLEDVVNYSNSSSNIWQIYSWLSIPYQLVDVFNFKNKNLFASLSDKSNSNLDKYIYYNNLDDISYKYKLDKKPNLKKYKTSANNTYKYIVPGILKSHSIHSQKNDNTSGHEEIVDFDIIYAAEGADNKDKEFLEDKNQLHTDNKTNLVGRLRW…
CP001621.791	locus_tag=MMCAP1_0870 protein=C4-dicarboxylate anaerobic carrier superfamily protein_id=ACU79403.1 location=complement(1025406..1027172) gbkey=CDS	18.7	33.3	37.7	10.2	10.6	3.9	3	3	12.557	27.9635	28.894	18.5084	18.9376	6.98253	MMCAP1_0870	MHIKVENTEMNNFNSNIKKKKRLKMLSSFSILLLIMLVLMLVSWILYWSKTKTDLVKTISFNDWKYDPILSPIYNAWTSKYPNISAGNSQTWIDFMNSNSSLGWVYNSHGWIKDSYTIQHSGDAIFNGLAPIQPIGIIDVIYAPIKGFVLKSNIIIFTISIGAFLYILVSTKALEGLSQAIIAKLKGKEAFAIIPLMLFFSIFGTVEGFAEETLGFYMIFIPIMLMAGFDVFTGVLILMVGAGTGVIGSTVNPFTIPIAVSAINSGIDASTAKLTIGDGLVWRIICWLILTSFSTTFTLLYALKVKKNPSKSVTFSTLEGDKEFFLAHVSKTIKLDWKKKVSLVAFAISFLVMIFYLVGWDSIFNNTKMADQAIWIKKNIPYLTALIPGWGNGDLDNVA…
CP001621.792	locus_tag=MMCAP1_0871 protein=zinc metalloprotease protein_id=ACU79131.1 location=complement(1027241..1027948) gbkey=CDS	20.9	20.4	19.3	15.2	12.4	14.5	3	3	14.0342	17.1308	14.7919	27.5811	22.1534	25.9607	MMCAP1_0871	MYAFLNLMSKEKHQLSYQGNKITYYIHYKNQKNTILRLIDNQIIVSAPINTPIYLIEQFIYKHISRIIKIQNNYEFLRVYDFYTNKPWIKIFEQPVDIELVDQNIHPKKINNKILIKNYYDNQIQLEKIYNFLAKEYKNWFISRTLIWSQKMNLSFENVSVKVMKAKWGLCYSKKKHIIYNTKLLHFNIEIIDYVIVHELTHILYPNHSKDFWRHIASYLPNYQELQQILNSKGI
CP001621.793	gene=ychF locus_tag=MMCAP1_0872 protein=GTP-binding protein YchF protein_id=ACU79249.1 location=complement(1027920..1029014) gbkey=CDS	1005.4	757.1	819.4	175.2	172.5	161.7	3	3	675.121	635.771	628.005	317.909	308.182	289.506	MMCAP1_0872	MGLQVGIVGLPNVGKSTLFNAITNSKVEAANYPFATIEPNVGIVEVPDYRLDELFKIFNSKKRVATTIEFVDIAGLIAGASQGEGLGNAFLANIRQTDAICQVVRCFDDKEIMHVENSIDPIRDIEIINLELMLADQTTVKKRLDKILPKFKSGDKVAKVEYDLLNYLLDTLNKGILLNSLTLDEEQTDLLKSYQLLTSKPIIYVCNVSDTELLEDNDYVKKVRQFAEKSNSQVVKICAKIEEDLSEASKEEKIEFLKELGIKESGLDQLIRAAYDTLGLQTFFTAGPQEVRSWQFKKGWTAPKCAGVIHTDFLKGFIKADIYSINDLLVLGSEKAIKEAGKMRLEGKTYIMQDGDVCFFKFNV
CP001621.795	gene=gidB locus_tag=MMCAP1_0874 protein=16S rRNA methyltransferase GidB protein_id=ACU79836.1 location=complement(1029252..1029947) gbkey=CDS	102.8	90.1	83.3	53.6	60.1	70.7	3	3	69.0297	75.661	63.8428	97.2597	107.372	126.581	MMCAP1_0874	MFNNWDIFLNYKNFTINQEIKNKLNLYYQILIQENQKYNLTRITQLNEVFEKHFLDSLLFVEQFQIIDQKIADIGTGAGFPGVVLKIFFPNIKLTLIESNNKKANFLKYLVQKLELNDVEILNKRVEELNEYKEQFDIVISRAVAYLDIILELGVQLVKVDGMFILLKGPKAHQEIKDLKNKDQKMNLKLVNIQELEDTGFGTRVNLFYKKIDHTNNLYPRKYQQILKESK
CP001621.796	gene=pgsA locus_tag=MMCAP1_0875 protein=CDP-diacylglycerol--glycerol-3-phosphate 3-phosphatidyltransferase protein_id=ACU79047.1 location=complement(1029947..1030543) gbkey=CDS	44.7	44.4	37.3	NaN	NaN	NaN	3	0	30.0158	37.2847	28.5875	0	0	0	MMCAP1_0875	MKQKTINLPNILTTIRILLVPIIIVLLLVDHYMNGLVFTNFSKFAWFISGAIFIIASLTDFLDGWIARKYNLVTNFGKFFDPIADKLLVNATLILFSSLGVLPIWMTVVLILRDTFIDFIRMILSSKGITLAAGMGGKLKTTFQMIGLSLLFFINLKIFGWSEWDWQNQLVLIPMYIATFFSIYSGVIYFLKARSNLF
CP001621.797	locus_tag=MMCAP1_0876 protein=amino acid permease protein_id=ACU79180.1 location=complement(1030645..1032225) gbkey=CDS	10.8	14	17.3	NaN	NaN	NaN	3	0	7.25215	11.7564	13.2591	0	0	0	MMCAP1_0876	MKNKGKLLEFLTLFAMTIGSVVGAGVYFKNKEILFDTRNPIIAIILWIIVGSVCVSMVYLFLEIASSTKNGGSGTIGVWTKLFINRKVGSFFAILNAFFYLPVMQSMFISFFITFILMMFSTVQLKGIHFLLIFLTTGIAIIIINALINVFDLSISRKYQAFGTIFKFIPLAIALIAGVVLFDQNGAFLSGGINITNPTGGTSKVEWSTNNFNPLLFFRGFGGILFAFDGFIFICNSQRKAKYKDVVPKALIFGMIFVSVFYTLIAVSLLMGSPDGSIGALLEKLFNGGKVLSSSDSSTLSRVANILTSVIIIIICSIGANNLSYVSFVVIESDVIDKLYLTSQKNISAKRIAIIQVSVATAIYSTFILVGTLATVGLTNTATVEQAVSSTNGLIYPIQ…
CP001621.799	locus_tag=MMCAP1_0878 protein=amino acid permease protein_id=ACU79076.1 location=complement(1033024..1034562) gbkey=CDS	24.5	29.2	16.7	20.7	16.7	20.8	3	3	16.4516	24.5205	12.7992	37.5611	29.8356	37.2402	MMCAP1_0878	MKNKSRFFEFLTLFMMSVGTIVGSGIYVKNRDILIETHNPIIAIVLWTAVGISCIAVVYLFLEISSSTKNGTIGSWSRAFFGHKVGSFFANFQTMFYAPVNQAIFTSALLSYFLNIFDIKLYGYQYLLIFLLVGAIIILLTNILNVFSIKGSKAVQIFGTGFKFFPLIIALFAGFILADHFGALQNNGVDVRGIDATKSWTKHDFDPLLFFRGFGGILFAFDGFIYICNSKKRAKHQDVVPIALVSAMAFAAVFYLIMSISLILGSPDGSIEQLLERVFNNGQPLKTQVNQTVKVMVAIISMIICFLGLNAYSYIGMAGLESDVIDGLSYIKSVDDKHRFKKIGLIQGVISYAIFAIFIIVGASSSISLNQQIEVGSATDSASGMLYLIQIMSSTCSCL…
CP001621.8	locus_tag=MMCAP1_0008 protein=ribose/galactose ABC transporter, permease component II protein_id=ACU79382.1 location=complement(9991..10968) gbkey=CDS	48.7	70.9	62.5	NaN	19.8	19.2	3	2	32.7018	59.5379	47.9013	0	35.3739	34.3755	MMCAP1_0008	MTILFNTSILTWALALVGVLLFASLSSLVSEKAGVVNIAVEGMMIIGALVVSILGTYLTSNDNKSNYTQIPIVLLAGVITAVFALLHAFPAITLKANQIISGTAINILALGLGIFLSTSNWFGKQSQVIASGYSSIDVINITKVVNGKTQQVASMLPIWTIIAIILAIGLFVFFKYTKQGMRYAMVGENPNAIDAAGISVTKYRYLAVILSGFLAGVGGGVFVVTAVSGGGLFSGNMLGYGFLGIAIMIFGQWRISFIVIGSIIFSWLFALGQQIGTLSTNKTIQAISTLFNTLPFVLTILAMVAFSKTSRAPAAVGVPFDKAKR
CP001621.80	locus_tag=MMCAP1_0088 protein=conserved hypothetical protein protein_id=ACU79800.1 location=complement(108628..110478) gbkey=CDS	15.6	15.2	15.5	81.8	90.2	78.8	3	3	10.4753	12.7641	11.8795	148.43	161.148	141.083	MMCAP1_0088	MKKLLTILGSLAIISSGASVIVSYNKTNASSSEIKKVEEEIIKPTDPNNFTINKSKSTWQDIFRDSITGADIFSYSSKNKKYDKKDAEAKFIKALRDLTPNTDKEQAEWASRKHDQAIKDFIRNLRDLTPNTDSENKAWSDKKAEDKIKKEESNKRDAEAKFIKDLKDLTPNTDAENKEWAEPSAVKKEIDELIKKEEIEDEIAKFFDDLAGLTPNTDKEQAEWTNRKHDKAIKDFIRNLRDLTPNTDSENKAWSDKKAEDKIKKEIDAQIDKEEDEDFDSEMSRLNEALKNEINHWESRIKKEIDKLVEKDEAEDFSKEFNEEINRLDDALKAEFKKWVDEINKIKKEVDAQIDRENEEDLLIEISKFSDALEKELDEKAYPSEIKKEIDELIKKEEI…
CP001621.800	locus_tag=MMCAP1_0879 protein=E1-E2 ATPase subfamily, putative protein_id=ACU79519.1 location=complement(1034620..1037277) gbkey=CDS	88.3	124	104.6	104.6	110.8	113.8	3	3	59.293	104.128	80.1675	189.802	197.951	203.747	MMCAP1_0879	MFKTKKGNLKSLDYKKQDYVIKLSNTNSNNLESILDSKIGLNNQTRQNNISKFGSNQIVVKKFLIFKKILETLIEPFNLLLLFIGILELIIYFLFQRNWITLISAFIIFFMIFLASIVDFIQEYKAYKFNLKLTKIIENDVFVVNDQIKDFNNLNYQNIKNNLIKEKQSNLTIGDVVYLSKGDIIPSDCRIIWSEDLYLDESTLTGESKAIKKQTTNTKTNFLELENILFKETLIVSGNCLAVVININKDNYSNSLLDLIDDEVITDYEKGINKVTKILIYLISILVFIITFISLLKTGISNWTSSLVFGLSIAVSLTPEALPAIISSNLKLASKRLSKNKVVIKKLSVLQNIGSVNILATDKTGTLTLDTTNIETYLDINNQKNKLLMQYFFYNAYFQ…
CP001621.801	locus_tag=MMCAP1_0881 protein=hexose phosphate transport protein protein_id=ACU79824.1 location=complement(1038636..1040063) gbkey=CDS	265	254.2	292.3	32.7	41.4	29.5	3	3	177.946	213.463	224.025	59.3357	73.9637	52.8166	MMCAP1_0881	MKTVEKWSQNHKMLYGSILWAFIGFGYLLFIANWAFAIGLAGGGIKDGVTSPGFLGYFKIVNDQSFQLTNTAANWAITFGRGIGSVAVAFLLVKFAHKRATLIACVMTLFGLPAIFMPGEKYGYVLFLILRTVMAIGGTMLTILFQPVAANFFTKKAKPVYSQIAIAFFPLGSIVSLVPFVIAGNSEAVQNIQNNWKLVFGIMSLLYLIPLLAVLFLGTNFDVKKDSNEPKVNGFKILKGYLKTKSTYAWLLVFGGWLVVAVFPTSLSLLLFPWISGLESNTLANEIRIWQILFLFAGTVGPVIVGLWSRFNLKRRWYIVALTGMGILLFILSIIVYKFGLATNYSQQSKSLSGNYKGWLALFYILGFLSGFCTWGIEAVILNLPHEYKDADPKTIGWM…
CP001621.802	locus_tag=MMCAP1_0882 protein=conserved hypothetical protein protein_id=ACU79736.1 location=complement(1040268..1040912) gbkey=CDS	2.8	55.6	2.5	1.8	1.4	3.5	3	3	1.88019	46.6898	1.91605	3.26618	2.50119	6.26637	MMCAP1_0882	MTLAWIKTNYESHINELIKYLDSNWTTEKIYKKIIHFENNKFKTSPFFNHNQLKTLFNLMLIKNSYQKRITKRVLEIILNKDVLEWIFIDALIRFYVLVLTYDDVWQEYEISDFAMHNNIIDVDKYFQNYLDKSNLKSVRFYQQYIKKNIEDLQIKKNLLDQLKDLDCDYITIDFNTLTITKKVCVSNINLKYKDYVIEQFINMLEKSNQLVEI
CP001621.803	gene=asnA locus_tag=MMCAP1_0883 protein=aspartate--ammonia ligase protein_id=ACU79456.1 location=complement(1040969..1041949) gbkey=CDS	3494	2402.1	2610.1	196.4	198.2	203.5	3	3	2346.2	2017.15	2000.43	356.377	354.097	364.345	MMCAP1_0883	MYKSKLSIKQTQQAIQDIKFGLTKQLKQNLNLTRVSAPLFVTSESKINDGLNGDIPVVFTPNQWNEDLEIVHSLAKWKRYALDKYNFNFGEGIWADMNAIRKDDVVDYKHSLYVDQWDWELIISKEQRNLEFLKQIATKIYDSIRYVEHKINFKYPDLIDKLPKQLTFIDSLDLYNKYPNLTAEQREDEVAREYKAVFIYKIGYDLPDKKPHSKRAFDYDDWNLNGDLIFYDLVNDKALEISSMGIRVDAKSLSEQTKMLNKTDSDLGLYHDQVLNDKLPLTIGGGIGQSRLSMFLLEKAHIGEVQVSVWEKQYKEELKKQGIILL
CP001621.805	gene=gidA locus_tag=MMCAP1_0885 protein=tRNA uridine 5-carboxymethylaminomethyl modification enzyme GidA protein_id=ACU79593.1 location=complement(1043171..1045060) gbkey=CDS	1322	952.6	1057.5	146.8	141.8	131.3	3	3	887.716	799.941	810.489	266.376	253.334	235.079	MMCAP1_0885	MKSNYDVIVVGGGHAGVEAALASARLNKKTALINLYEDKIATMPCNPSVGGPAKGIVVREIDALGGEMAKAADATALQTKLLNSSRGPGVWALRVQSDKEEYSKYMRNVIKNQKNLDLITRACTGLVYDDNKTVTGIYLDDQTILNAKAVIITTGTYLKSEILKGVDRYESGPNNEKTTKGISKSLIDLGIKLMRFKTGTPARVYRDSVDLTNAVLEPGTDMKLAFSFSTNTYTPIEKQQPCYLIHSTLETKKIIEDNLEKSAMYSGTVESIGPRYCPSFEDKVVRFKEKDTHQIFIEPETLNGDTWYVQGFSTSMPIEVQELMLKSLPGFENVRVKHWAYAIEYDCIDPMQLSPSLELKDVRNLFTAGQINGTSGYEEAAGQGLIAGINASRKIDGLD…
CP001621.806	locus_tag=MMCAP1_0886 protein=proton/glutamate symporter protein_id=ACU79087.1 location=complement(1045208..1046785) gbkey=CDS	99	223.9	124.3	119.9	125.5	130.1	3	3	66.478	188.019	95.266	217.564	224.214	232.93	MMCAP1_0886	MQDKTNVLLDKFLAIGSWQAAIAIIIFIGIQIGLWFTFKKFKIKFIYRVLIGLAIGLVFGIIIQAIYKFPQNGLVNKNLPTELAKDGTTTIKINPDFRLWVYQLDIWISLAKNIFINGILLLTAPVVFIAIFRVTSKKGNKNVGRISLKGVGLLLLNTAFAFVITFWLGYLIKVGAGSGLSLDHSIVKNTPKETQPLPKIVWEYLPNNFIQPWLGSMVIPLMVIAGLIGNSVKILSKKKPVEMDAIRKGMDVAWSIVISILMTFMKIMPLAVMSMIASSVISKPIGALATIGKVLGLGYLGLTISLLFLTFLLFVNKVNVIAWWKLSFKILIQGFATQSSNATLPMSIETLKDEVKIDDSAVSTVVPLSTTMGLMGCAGVQSGVITSLLWTGAVSADFH…
CP001621.807	locus_tag=MMCAP1_0888 protein=pyrazinamidase/nicotinamidase protein_id=ACU79285.1 location=1048366..1048866 gbkey=CDS	56.6	52.8	61.4	55	61.3	64.1	3	3	38.0066	44.3385	47.0582	99.8001	109.516	114.764	MMCAP1_0888	MKSKNKNKALIIVDYQYDFCDPNGSLYVKNAYTLKPKIEKLAKELKSQGWTIIATKDFHPIDHCSFKIWNKHCVQNTKGSELYFDYSDVDLIIEKGVNKDIESYSGFFDDANNSNGLDEYLKSKNIDTLKIVGVATEICVKANYDDAIKLGYDVHVDLEYCKGFTD
CP001621.809	gene=lppQ locus_tag=MMCAP1_0891 protein=lipoprotein Q, putative (LppQ) protein_id=ACU79305.1 location=1050922..1052256 gbkey=CDS	207	261	230.4	1090.7	1027.1	1111	3	3	138.999	219.173	176.583	1979.13	1834.98	1989.13	MMCAP1_0891	MKNKHISLLAKLGVLFSVTSLPLVVVSCKTSNSNNNKPNNNQQKQVSKIDISSLKDKIEPKNEWEKQDVLQALLKINGLDKLTENDFEFKVEKKANLLHNGKLVIQSKNDSKIIKGELSLEIKKLDKVKKVEIKYNDNKTEVLEIGYDENGKISKFAETVKKVPEKLPEEIINLDDAFRKNNSDKIENLDKWDTSNIVSMWSMFQNAQNFNQDLSNWNTENVTDMSYMFNGATKFNGDLSNWNTENVKSMRSMFEDAKEFDKDISKWDVSNVENTKSMFKNASKFNKSLSNWNLKSIKTLDSMFFGANEFNSDIFKLDSKLVTDMSYMFYKATKFNKSLNWDVSNVANMNSMFNGAHSFNQNITNWDVSNVKTMKSMFSDTNSFNQDIKNWKVENVTDM…
CP001621.81	locus_tag=MMCAP1_0089 protein=putative liporotein protein_id=ACU79072.1 location=complement(110737..112428) gbkey=CDS	NaN	NaN	NaN	5.2	4.1	5	0	3	0	0	0	9.43564	7.3249	8.95196	MMCAP1_0089	MKKLLTILGSVGLIATTSAAVIACGDKTPSAKQPTNSNEKPSNNGDSSNPSESDKDKKPGNTKPSESDSNRSTTPVDPKKPNESGSKPTTKTDKSNNDQTTPIKPKLATISWNSIFRDSATGADINLNPTKEQIEAENKKQEEIIKKELDKNKEYNISFHKQNIDVLKNEIIDLRSNRFVIAKESNKKEKELEDLKEANIRKTTKDFETNKNILDKKKQENDHKLNYLIKEVFQKQNLKAKSEQAKKELEDLKDWLKEANELVNEYTTKEKEYTDQVTKAKELDTNITKTESEIQTNKKLAESIEKITEDIKKVEDQYNKEITEKQNWIKELDDDDKELKKRKEELTNSYDEFDSFIYNGRLENAFRHEIISSLDEFIKNNNETRDEIRKIEADLNKLK…
CP001621.813	locus_tag=MMCAP1_0895 protein=conserved hypothetical protein protein_id=ACU79244.1 location=complement(1057422..1059683) gbkey=CDS	4.1	3.7	6.5	4.9	7.5	6.2	3	3	2.75313	3.10705	4.98173	8.89128	13.3992	11.1004	MMCAP1_0895	MKKLIVLLTAISVFSAAGISYVGYKNLSNDTTINNQEHEFKQLEEKLRTLQNEILNSEAKIKDLDTKDAEIIKNSNEKIKILKQLESDITSKLTQENNKINELIKNLNISISESKIKKEQKIKLEQELAKLKREKLKNDANHTFFNGEIRKLQDKLVLSNTKLDELKERIKSYESELIKLETDKNNKQKNIDKVKNELAKKQHLILVLKLKIQEYDQLLKDYSNLEEQFNSLKKSVNEKQKEIQEKTEILQRTHEQLQQLSNSNDNDKKELKNKISKLEQTEEKISNLNNQINQVKSEISDLNKKKESDLMNVKSEISDIDKQLEIANTKLSQSNESISQLKEVIKQLKKDKSHSTLENQKLDRQIEEKNTAIQKLEKEQQQYLTNIEKLNTQKSNLEQ…
CP001621.814	locus_tag=MMCAP1_0896 protein=conserved hypothetical protein protein_id=ACU79616.1 location=complement(1060000..1062255) gbkey=CDS	12.6	62.5	61.4	404.7	422.4	401.4	3	3	8.46084	52.484	47.0582	734.347	754.644	718.663	MMCAP1_0896	MKKLTSLLAAISVFTATGLGYVGYKNITNFKDTEQNNVINKIKTIKNDLENSQQELKNLEKLLKEKENKKTNLNTEIKILETSINNLNNKTKTNKTKLDKLNADLLNVNNQLDIDKQNISKKEVQISSLEKQIKETKKNIDKVATEILNKHKQIKELSNKNKDTTKLKEQLENYKTTFINELSNIKSALNKIRNKRFILELRLSNIKKYEEKNKTLVSQTNDLKKQNTQLTNEVETLNQQLNKTNSELESITQKINDTKQEQEKIKKQLIDKQKQITQNNKKIDQLTKLVKEYENQLEILKNEKNQVWHKELKDELKSQENKLSEVDSQINKNNQLISELNRDISKLKQELSNLENDNSTKQQELNEKLNKIQTIKNENQSYFKQKYDLEIKTRSLKSK…
CP001621.815	locus_tag=MMCAP1_0897 protein=conserved hypothetical protein protein_id=ACU79709.1 location=complement(1062265..1064526) gbkey=CDS	80.9	79.4	86.6	404.2	418.8	409	3	3	54.3239	66.6757	66.372	733.44	748.212	732.27	MMCAP1_0897	MKRLILLLTAISVPTASGISYVRYKNLSTNNTINKQDNELRRLEKELEQIKYEIKTREDKIKALDLKDAKDIQNINTKIELLKQQEKQIKDKLTKESNVINKLNEDIRLFKAEVKTKKEQKNKLEVEFNKLKEQKNQTNKKQFLINTRISWLKDQLNSSNVDYDNLKKLIETYKNDLLKLEKDKLDKLKNNSDLNKQLTRSKYLLSVLQAKIQKQTELQTKLVELEEQKNNLQKTAKEKQQEINNKQAILNNNKDQLKQLIESSTNNKNQLDNKTLELNQTSKKIKELEDQLNKLKSEISDLNKQKEEDLLKVKTNIQNNKNQLEVLQNQLDQINKKIDELKQSIEQIKKSIKDKQTENQELDEQLKEKNIELEKLKKEKQKYLNSIEKLTKKSNDLEQ…
CP001621.817	locus_tag=MMCAP1_0899 protein=conserved hypothetical protein protein_id=ACU79564.1 location=complement(1066997..1069237) gbkey=CDS	16.7	22.1	23.7	8.3	2.9	6.8	3	3	11.214	18.5584	18.1642	15.0607	5.18103	12.1747	MMCAP1_0899	MKKLVALLAAISVFSAAGFSYVVYKNIHNQRSFLNTHQNEVKELEKQLKSVSDDINTKENQLKVLLLEDEKNFISSKDKFNELKQKQKELIKKDSDQKQMISKLTRDLTNLKLESKTKNDLKIKSESELINLKKIKEHKDEIKDYFIKEIKNKESELAKKNNEINTTITEIESLKKELDQLNKNKDKKQQEIATIKNQINKDYLLLFKLKTKISRYKKLEKELLELNKQTNTLTDSKIQKQVELNQQKAVLKEKQTQLNNLLDELNKNIDQLNKNNNELENINKQIKETEDQIQTIKTKISELKKEKQADIDKVNSEIRNKEKEIRDLQTQLDQTNSQISSLNQQINDLEKQKQNSTSENNTLTEQLEKKKNELKQLINQKESYLDSIKNLKQQKQELE…
CP001621.818	gene=vlcF locus_tag=MMCAP1_0900 protein=lipoprotein, putative (VlcF) protein_id=ACU79193.1 location=1069553..1070188 gbkey=CDS	535.1	946	801	3342.4	3498.4	3303.4	3	3	359.317	794.398	613.903	6064.94	6250.11	5914.38	MMCAP1_0900	MKKLITILGSVGLVATTSAAVIACGDRAPSTKSAEKVENKEKTKPSEAPKKEESKKEEKKQEEFQPKFSDVENKNLGNFEPSNKNTISQLDIKKELAKKLNVNESDLQELKINYDEKTGKVTLPRFNNKNLKFNFTTFYQLGKIKTNKTGDIWFLSQLDIKKELAKKLNVNESDLQELKTDSSSNGIGFGSVRSKTFVGTLEFKFEIDENK
CP001621.819	gene=vlcG locus_tag=MMCAP1_0901 protein=lipoprotein, putative (VlcG) protein_id=ACU79275.1 location=1070421..1071032 gbkey=CDS	487.2	615.6	443.4	558.4	568	610.7	3	3	327.152	516.947	339.831	1013.24	1014.77	1093.39	MMCAP1_0901	MKKLLTILGSVGLVATTSAAVIACGDKTPQKTPGTNPTEETKKEEDKEKPKKDDEKTEDKEKMDFSKIDKNLGNLEPDNRNILSQDRIKEEIAKRMNVTKPDLQGLQVDYEKGTVKVTLPRFENKTIEFAFTSYLDLRKSFETSKNGKSFLDISKIKEEIAKRMNAKPEELQELSVDSNNNTGTVHSTKFTGTLTFKFNTEKK
CP001621.82	locus_tag=MMCAP1_0090 protein=putative liporotein protein_id=ACU79158.1 location=complement(112591..114963) gbkey=CDS	227.5	224.9	268.7	115.4	118.2	119.9	3	3	152.765	188.859	205.937	209.399	211.172	214.668	MMCAP1_0090	MKKLLTILGPIMISTSGATLVVACKTPATKQPTNSNENTNQNEPTKPSEKDKDQTDPKKPVEPTNPSNKPENNPTKPSKKDNEKPNSVKPKPATISWNSIFRDSATGADINLNPTKQDLEKEEKRLEELVKNILKDNKKVNDEAFNKFIKEHKDWWNKFVKDLKIQIYRDSVSGLDINLNPTKEQLERENERLDKWVKEYLEKNKKENQALLDYLIKTKIDEIFRDSPTGLDINFYLTEEQIDTENKKQEQLIKEILDKNYKDNFANLMAIKASQTVKELFSDEFSNLVKAAIKNRFIKTYSDSITGADINFYLTKEQLEKEVKDILDKNYSDNYARFLEHLASRDTNKLFNDEYTDLIKAVLKNRFTKTYSDSITGDDISWSPTKDQIENHLSTLTKE…
CP001621.821	gene=vlcI locus_tag=MMCAP1_0903 protein=lipoprotein (VlcI) protein_id=ACU79043.1 location=1072302..1072877 gbkey=CDS	18.2	61	48.1	288.7	317.7	279.8	3	3	12.2212	51.2244	36.8648	523.86	567.591	500.952	MMCAP1_0903	MKKLLTILGSVGLVATTSAAVIACGDKSQQKAPDKQEETKSADEKKEEKDEKRKEPDYSKVDKQSIGNFQPNNKNSVQQGDIKKKLSSLLGVHESELSKLNVDYTKNSGEVTVTKFNKTLTFTFTSLLELGEFEFKNNTVSLGDIKKRISSILKIDEKYLYELKVDGTKNLGSVKSSVFLGTMEFKFTEKK
CP001621.822	gene=vlcJ locus_tag=MMCAP1_0904 protein=prolipoprotein, putative (VlcJ) protein_id=ACU79381.1 location=1073177..1073821 gbkey=CDS	32.1	55.2	42.1	998.6	959.5	1019.8	3	3	21.555	46.3539	32.2663	1812.01	1714.21	1825.84	MMCAP1_0904	MKKLLTILGSVGLVATTSAAVIACGDKSQQKAPDKKDEKKDIEKSKKEEEKDKDSEKEKTPEKEEKMNSMFPKQNLDLGAFFKYDNKNNSFSQLEIKQKIAELSNVHISTLTDLNITYEKDSGEGTVRSTKYSDTLKFKFSNTLDLGEFQKETNGTVPQAKVKKKLSETLKQSEKDLVGLEVKYEEKTGSGTVKSNKKMGTISFKFTIKEQNKK
CP001621.823	locus_tag=MMCAP1_0906 protein=choline/ethanolamine kinase, putative protein_id=ACU79516.1 location=complement(1074749..1075465) gbkey=CDS	157.7	93.7	85.9	20.9	17.8	15.2	3	3	105.895	78.6841	65.8355	37.924	31.8008	27.214	MMCAP1_0906	MKIKITKGGTNVSYRVDNTFLQIKNYNNFNHQINYELLKNFDFVPKLISNNQKEIVWEYIDGVEPVIDLGNINLIANQIKQIHNSNLKFPDNNLKQRVEYYKTKMSELNTSVEVISKYASLIDDILDSMEFNTPLHNDLFPFNMIQTENKIYFVDWEYATMGDKHFELAYLIETSNMSNQCEKVFLDLYRNYDEHKLLLNKIFVNYIVILWIRTQTKAPHNTTFFEQKIINYVAKLNI
CP001621.824	locus_tag=MMCAP1_0907 protein=conserved hypothetical protein protein_id=ACU79821.1 location=complement(1075465..1076259) gbkey=CDS	68.1	44	59.2	64	92.6	63.1	3	3	45.7288	36.9488	45.3721	116.131	165.436	112.974	MMCAP1_0907	MKYLFSDFDNTLRNSKVKNSLKIDQKDLEFVKEFQKNNKLIVSTGRPYKQLKKHLLDEYNLLPDYFIANTGALVCNNQGEVFYKKTIDKNIKIQLLDFLKTIVDQIDVIVFATSDNESFLFHKNWSTDVEKFFFGLENLNKTLDYLYDKDLLCLKIECSQNTWDQIENFINKNKLEVNITFNSINNKLFNEIHAFNVSKGQAIKGLQEKLNISSVDIIVAGDDYNDLSMFEMFYDNSYICKHEHNKNIRNKARYLINNIWEIEY
CP001621.825	locus_tag=MMCAP1_0908 protein=membrane protein OxaA protein_id=ACU79706.1 location=complement(1076336..1077526) gbkey=CDS	41.5	71.5	58.8	142	143.8	161.8	3	3	27.867	60.0417	45.0655	257.666	256.908	289.685	MMCAP1_0908	MYKQSDKVMSYLNASKNKKAPKTKKETIKLVIKWLKVFGFLFILVSMLWGCVQMYQAQYSVNQIVDMTGKSVYAPGVSFEIILSSLGEKGSKVHHFVYDKGNYFEYGYNAITSWKETFKLTQSPFYGFFVYPTAWVLAGMVRLFSGTLNPLLDKSSQLSYGISAIFAIFLTTLLIKGITLSFGWKSQINQEKMQDIQLKIADIQAKYKDKKDMQSKQKQQLEIQALYKKENMSQFSALAGSFAPLPFLFAIYAIVRSTRALKIAAVGPIALIEGPWQQITSGNYIYIIILAIYLPLQAVSMLLPTLLQMKKQKSITLTEAQKKSRKKQLIMQVVMMFVFIIIIVSVATGVCIYWIFSSVLQIIQTYAFYLYNEKKRKAGNQERQRRLRQMERMNLK
CP001621.826	gene=rnpA locus_tag=MMCAP1_0909 protein=ribonuclease P protein component protein_id=ACU79153.1 location=complement(1077544..1077873) gbkey=CDS	20.4	34.9	37.6	NaN	NaN	NaN	3	0	13.6985	29.3071	28.8174	0	0	0	MMCAP1_0909	MKNKRVIKKNFEFQEIINYKKTVKNFCFVIYYKDNDQSYLKYGISVGKKIGNAVVRNKVKRQIRMILRQNINEIGSISKDVIILVRKSVLELKYATLSKSLIKLIKEIK
CP001621.83	locus_tag=MMCAP1_0091 protein=putative liporotein protein_id=ACU79408.1 location=complement(115400..117490) gbkey=CDS	NaN	NaN	NaN	24.8	27.9	26.6	0	3	0	0	0	45.0008	49.8451	47.6244	MMCAP1_0091	MKKLLAILGTIAISSTGASLVIACNNPNSKPSVEPDKTTPKNKPKETAKEETDKNSTNKTDKNSKESSDKNNTVLTKRSWNSVFNDSLTGYDIIYKLDETVLQNNKHYKFFVNSSSNLVSDLFDDKFAEEVKEAKNRWDKIQAKKTKLEKERLYKEFTTSSANATEDYFKTLEKIAELEAKAEAKKKELEKWEAKLAEEFKNSASSTTEDYFKTLEKISELEAKAKEKEKEAENRTKAEEKAEKEKVDNLIDAEINAELASDLTEDYFKTLEKIAELEAKAEAKKKELEKWEAKLAEEFKNSASSTTEDYFKTLEKISELEAKAKEKEKEAENRTKAEEKAEKEKVDNLIDAEINAELASDLTEDYFKTLEKIAELEAKAEAKKKELEKWEAKLAEEFK…
CP001621.84	locus_tag=MMCAP1_0092 protein=putative liporotein protein_id=ACU79358.1 location=complement(117718..120207) gbkey=CDS	116.9	138	100.4	78.6	87.5	98.6	3	3	78.4978	115.885	76.9486	142.623	156.324	176.533	MMCAP1_0092	MKKLLTILGSIMISTSGAALVVACKTPATKQPTNSNENTNQNEPTRPSEKDKDQTDPKKPVEPVNPSSKPENNQTKPTENYDPKTYKDTTIFNRHFVSGNPSSWVGTIHNSSFIYGSPFKPNNETKPNESTTPIEPKKPVDPTPSTKPNDNNRNDSNSNQSRPLTPLQPSIPTNKPETKPVSPTTTWYSVYNDSATGADINLNPTKEQIEKEEKRLEDWVKEYLDKNKRENQALFDYLIKIEYDRIFRDSPTGADINFYLTKEQIEAENKKQEDQLKAILDKNYKDNFANLMAIKASQTIKELFSDEFSDLVKQAVQRYKHHGDTHARESAKITEEIFSDEFSNKVKEAVERYKKHGDTHARESAKATIELFSDEFSDLVKQAVQRYKHHGDTHARESA…
CP001621.87	gene=secA locus_tag=MMCAP1_0095 protein=preprotein translocase, SecA subunit protein_id=ACU79166.1 location=complement(121963..124797) gbkey=CDS	1746.2	1549.1	1675.2	1660.3	1651.9	1600.5	3	3	1172.56	1300.85	1283.91	3012.69	2951.22	2865.52	MMCAP1_0095	MVSDKRLLKKFGKIADKIIALEPQMRQLKDEDFILKTQEFKQMLEDGKSLDDILIEVYAVAREAARRVLGLNAYKVQLIGGIILNSGDIAEMRTGEGKTLTGIFPAYLNALSGKGVHIVTVNEYLSKRDSEINGQVFDLLGISVGLNGSSLTKTEKREAYNKDITYTTNAELGFDYLRDNMVSDYSLKVQRKLNYCIIDEADSVLIDEARTPLIISGGTSTRINLYKAANNFALTLKEHDDLDIDLESKQVYLNEQGMKKANEFFSLKNLFAIENTEIFHLIMNALKAQFAFKEGVEYTVRDNEILLIDQFTGRIMHGRSYSDGLQQALQAKENVDIEEETVTLATITYQNFYRLYSKIAGMTGTAKTEEEEFIKIYNTRVIQTPTNKPVIRKDEPDLT…
CP001621.88	locus_tag=MMCAP1_0096 protein=Xaa-Pro dipeptidase protein_id=ACU79801.1 location=124888..125463 gbkey=CDS	65.5	44.9	52.5	NaN	7	NaN	3	1	43.9829	37.7045	40.2371	0	12.5059	0	MMCAP1_0096	MKTIKKEIYKNEFIIKNSKFITIATNINSKDELEEFLNKYSDINATHNCYAYMIYDQKLIGGYNDDHEPKNTAGKPIFNVISKNNLVNIVILVIRYFGGIKLGASVLTRTYSNAASLIIKDLEIIEIKTYYQYLISFDIKNLKLVNQWINQNNIEIISKDFSLNVVFKIRSTSKITSCNFFKIIDFKTIKN
CP001621.89	locus_tag=MMCAP1_0097 protein=DNA polymerase I, 5'-3' exonuclease protein_id=ACU79743.1 location=125538..126449 gbkey=CDS	194.4	199	180.7	26.5	18.3	20.7	3	3	130.539	167.109	138.492	48.0855	32.6941	37.0611	MMCAP1_0097	MITNETKPILLIDGYHLLHKGYYGTLKRTIVSKNKDGIVINAIYSFVANILKFVQSDRYHSVIVAFDFDENCWRKELYSEYKAKRKPTPIDLVPQLQIARDFLTSANISWYEKYNYEGDDVIGSICRIANKLGYDVCILTNDKDIYQLVNNKTSIITNISKKEKTKIIKPQQVYEHFLCQPNQVADIKAILGDQSDNIKGVKYIKRKQAENLINKYENVENILAHINELNEPLKTIISENKQLIIDNKKITKILTNVKLGRINFKPTKITYYGLIRFLKEQEMYAFIKPIRRYLDRTNKNLKK
CP001621.9	locus_tag=MMCAP1_0009 protein=ABC transporter, permease protein protein_id=ACU79054.1 location=complement(10968..13535) gbkey=CDS	57.1	92.5	76.2	292.3	292.1	270.9	3	3	38.3424	77.6764	58.4012	530.392	521.855	485.017	MMCAP1_0009	MQSKISWTLSKKSKYLFGSDTTKTKLKYIKGSIFSIIVGFIVSGIFLSFLNINPFTYFALLFGINFDKNFYQISLNWMAVYIVAGLSMAIAFKSGVFNIGASGQILTATSVATIVFFSISGKDASSITPFMIILMLITCIISAAFIAFIAGILKALFNIHEVVSTILLNWSVFYIFKWFFGRYQDFSSGLSYTSKNIPSDQLSIGSNTVIIPLLIALICVIIIWILFSKTVLGFKLKAVGSSITGSKYIGINVKRQIITSLTLSGAVAGIAGFLSMFTVSPNNFFASNSLPTLGFDAIAVSLVAFNNPIGIIAIGWLWAIIKTGGGPISSLYSISTQISGLISGILIYFTAIVSVFIAFKPWELLKNKYNLYTSKVNREIYWKLKLYTFKLRLKKIFLI…
CP001621.90	gene=mmyCVIM1 locus_tag=MMCAP1_0098 protein=CCATC--recognizing Type II restriction modification system (MmyCVI) adenine DNA methyltransferase subunit 1 protein_id=ACU79701.1 location=126653..127669 gbkey=CDS	83.3	73.7	67.5	30.4	40.7	41.2	3	3	55.9355	61.8892	51.7334	55.1622	72.7131	73.7642	MMCAP1_0098	MRLTSRRYIGSKAKLLDWIFSNIDNNVKGNSFFDIFAGTGCVIEKALTSYDSVIINDILSSNKVVYDAFWGDIVINIDIINKYKLMFNSLDSIIDHNYFSINYGDKYFGVNDSKKIGYIRELIENDFKKNYINRREKNILLASLIYSIDKIANTVGHYEAYRKVEIIDNRFKFDLIDIPNKNINKKVEIYKEDANRLARKIYSDIVFVDPPYNSRQYSRFYHVIENLVEWEKPELFGIALKPAPQKMSEYCRNNAPAVFDDLITNLNCKYIVVTYNNTYNSKSSSSKNKIKLEEILNSLNKRGKTQIFSSDHRFFNAGKTSLPNHKEYLFITEVTCEK
CP001621.91	gene=mmyCVIM2 locus_tag=MMCAP1_0099 protein=CCATC--recognizing Type II restriction modification system (MmyCVI) adenine DNA methyltransferase subunit 2 protein_id=ACU79620.1 location=127659..128576 gbkey=CDS	54.5	59.1	63.5	24.4	22.3	14.1	3	3	36.5965	49.6289	48.6677	44.2749	39.8403	25.2445	MMCAP1_0099	MKNNIRSPFFYVGDKYKIMPQIVKFFPEKINNYYEPFLGGGSSAMYTKANKYFLNDINKSIIDLHKYLSSYSKNKNLLLNNLFKLIKKYRLSCSYLSITVPDELKKKYVKTYYSKFNKESYIELRNDYNKKNDSLKLYLLLIYGFNHMIRFNQQGKFNLPVGNVDFNKNVYQALMTYLEFADDNKIEFSNNDYIDFIKEIDFKEGDFIYLDPPYLISNSEYNRNWTIIDEQNLYDLIDNLDRKKVYFGLSNMLTHKGRKNHLLEKRMKKYYIHEIKSNYISRFDNKIKKDSKEVYITNYEKSRRT
CP001621.92	gene=mmyCVIR locus_tag=MMCAP1_0100 protein=CCATC--recognizing Type II restriction modification system (MmyCVI) endonuclease subunit protein_id=ACU79227.1 location=128554..130137 gbkey=CDS	169.2	165.8	166.5	19.5	17.7	24.5	3	3	113.617	139.23	127.609	35.3837	31.6221	43.8646	MMCAP1_0100	MRKVEEHKPISFSTTMRNPERMSQFIACMKDFEGHILTDELIMQIVRKVIKNKLYKPNYIKENCAINNIYNDESSTFSNVQLDDIVNNSPQNHKEAGFAKGWSSRFDTWYKLCKEFGFIYYDMDKKIEISSSGHMLCDAYLLNSKYDDLNNSGKKIQKIFLNALMKYQTNNPFRRNLNQNAPIPLLLNVLNLLALNSYSTGLHRREIPFLMCWENNDYERLYEFIINFRNKYGFKASDEIIYEECLKLLKSSNKKRFKMSQIIKEGVDDFIRKLRITGIFSLRGLGRFVDINKLESESVDYIIKNYTKYNIFSNKYDFYKYMSEIDTKILEFQEIAANHEINNIRIKTLRKISQKYSVEQIHKELRNLQLNKNSEDEYFKLIDSPTRLEFLTSIAIIQK…
CP001621.93	locus_tag=MMCAP1_0101 protein=ATPase protein_id=ACU79125.1 location=130577..131872 gbkey=CDS	14.3	12.2	10.5	1	NaN	1.1	3	2	9.60238	10.2449	8.04741	1.81455	0	1.96943	MMCAP1_0101	MVIKRDQYLDKLISKKHNGRVKIITGIRRCGKSYLLFNLFKDYLLDNGVDQSQIITMNLDDPLNVKYHNPLELYNYFLNKTTNKEIQYYVFIDEIQNCQAIKNPYFKEDSKLIDFTGVLIGLMLHENIDIYVTGSNSKMLSSEIVTEFRDRGDEIKVYPLTFKEIYESKQVKNFDLKTYFIYGGMPFVYKIDSSNERAIYLKNLFKTTYIRDILERYNVNNDQLILETLLNFISSNIGSLTNPLKLANRFLSEQKTKISSNTISKYIRYFEESFIISKAKRYDVKGAKYFTTPLKYYFTDIGLRNAWLNFSELDRSHILENIVYNELKIRGFNVDVGYLLYDQKSSDSRNIHNLEIDFIANLIDLKYYIQVALNIDEADKKEQEIRPLLKVNDNYKKVV…
CP001621.94	locus_tag=MMCAP1_0102 protein=conserved hypothetical protein protein_id=ACU79547.1 location=132532..132807 gbkey=CDS	51.9	42.9	54.3	19.8	22.6	43.4	3	3	34.8506	36.025	41.6166	35.928	40.3763	77.703	MMCAP1_0102	MSYYYRHNFSFSYHGLQRAKERLKLKDKKDYEVKEICLEHIRNSTKSFMSGNEIYISASNTNIFFVVNKTNNLIITVTEISAEKQLRMHGI
CP001621.95	gene=coaE locus_tag=MMCAP1_0103 protein=dephospho-CoA kinase protein_id=ACU79409.1 location=132809..133366 gbkey=CDS	12.1	NaN	5.8	323.8	308.5	342.5	2	3	8.12509	0	4.44524	587.55	551.154	613.209	MMCAP1_0103	MIIGIYGKIGSGKTYISNKFINFHPEFKIINADNVSKKLLEDSKIKSKLFEIDNNIIKNDIVDKKYLRKKLFTNKKLKQQVDSLLWPLISKQIQKEIKNNPNTNYIIEAALLFELNLTNLDLIVKVKSSLLKSIFRVLKRDKTNIRDILRIRRNQNKSIKRKKPDLVISNFYQLEFYIQKNRLLI
CP001621.96	gene=rrmJ locus_tag=MMCAP1_0104 protein=ribosomal RNA large subunit methyltransferase J protein_id=ACU79253.1 location=complement(133368..134174) gbkey=CDS	135.1	83.1	109.8	1.1	1.2	NaN	3	2	90.719	69.7828	84.1529	1.996	2.14387	0	MMCAP1_0104	MKLRLDEYIYKNNLTQSRNKAKEHILNKEVYVNNIAIIKPSFLVDSNDLIEIRSTKLEYVSRAYEKLKKAINKWNIDLTNKICLDIGASTGGFTQCCLDNNASLVYAVDVGTDQLHSSLLNNLKVINMSQYNFRNAKKQDFLKSIDFVCCDVSFISLEKIFLPLKDILEFNTSGVFLIKPQFELQPKNIKNGRINSKLDHKQAILKVISYANNNSFDVINLDYSPILGNKKQNIEYLAYVIKKENNYKIWKEDQINQLVNIAWKELKK
CP001621.97	locus_tag=MMCAP1_0105 protein=conserved domain protein protein_id=ACU79086.1 location=complement(134174..134389) gbkey=CDS	NaN	10	NaN	338	362.8	355.7	1	3	0	8.39745	0	613.317	648.165	636.843	MMCAP1_0105	MSNKSKSYDELISEIKEDTKKLSSNEISVEQAMEIFEQNIEKIKLAKEKLTQYKGQIYKVMQDDELEEFKD
CP001621.98	gene=xseA locus_tag=MMCAP1_0106 protein=exodeoxyribonuclease VII, large subunit protein_id=ACU79414.1 location=complement(134379..135788) gbkey=CDS	272.8	231	236.6	51.4	52.4	50.4	3	3	183.184	193.981	181.335	93.2677	93.6158	90.2358	MMCAP1_0106	MEKILTVQELNEALKTLIENKQEFKDIYVQGELSNLTFNKSGHIYFSIKEQDAAINCMMWKTNAYKIQSLNLEDGMQIICYGRLTYYIPTGRVSFEVRDIKIHGIGDLQKIFEQRYKELEQKGWFDPNLKKPIPEFVKNVGIITADSGAAIYDLIRTIHRRLPLINIFLFPAQVQGDKAEKDIANKIKQANDFKVQLDVLIVGRGGGSYEDLWAFNELEVLQAIKNSQIPIISAVGHEPDWVLSDYVADIRAATPTAAGELVSKSIIEIKNQLKHYYQNYKTLILNKLDFFDEKLNNYKKEQTKYIKNNFSFKYLQLKQLSIDNTKWTKNKINLVIDKLENYKQSINNSTLHIINSQNKTLKNYLIADEQKILNYLKKQISEFNYTISSFKGHINQILK…
CP001621.99	gene=nusB locus_tag=MMCAP1_0107 protein=transcription antitermination factor NusB protein_id=ACU79332.1 location=complement(135790..136188) gbkey=CDS	185	133.8	141	107.4	114.1	116.7	3	3	124.227	112.358	108.065	194.882	203.847	208.939	MMCAP1_0107	METKISFSKKRKLLIQTFYKYQLLNASIDYIHQDILDDVQNINNKDVLFEIEQIAKKQTDLINHININVSSSWKWDRIPAVIRAILIVGTYEILYTNTPKPVTINEMVKYVKEIEPDFDYKFVNAVLDKLVK
O43790	Keratin, type II cuticular Hb6	NaN	5.6	5.2	832.7	882.9	931.7	2	3	0	4.70257	3.98538	1510.97	1577.36	1668.11
O75190-2	DnaJ homolog subfamily B member 6;Isoform B of DnaJ homolog subfamily B member 6;Isoform C of DnaJ homolog subfamily B member 6	NaN	NaN	NaN	43.5;55.4;40.6	47.1;59.9;43.9	45.1;57.4;42.1	0	3	0	0	0	100.526	107.015	102.769
O76009	Keratin, type I cuticular Ha3-I	NaN	NaN	NaN	205.2	217.6	246.1	0	3	0	0	0	372.345	388.756	440.616
O76011	Keratin, type I cuticular Ha4	0.9	NaN	NaN	103.6	100.7	93.7	1	3	0.604345	0	0	187.987	179.907	167.76
O76015	Keratin, type I cuticular Ha8	NaN	NaN	NaN	75.4	92.3	79.4	0	3	0	0	0	136.817	164.9	142.157
O77727	Keratin, type I cytoskeletal 15	NaN	3.3	NaN	2.6	3	3.8	1	3	0	2.77116	0	4.71782	5.35969	6.80349
P00330	Alcohol dehydrogenase 1	1.7	NaN	5.2	1413.6	1433.7	1412.4	2	3	1.14154	0	3.98538	2565.04	2561.39	2528.75
P00366	Glutamate dehydrogenase 1, mitochondrial	NaN	NaN	NaN	38.8	33.2	30.3	0	3	0	0	0	70.4044	59.3139	54.2489
P00489	Glycogen phosphorylase, muscle form	NaN	3.6	NaN	85.6	85	77.8	1	3	0	3.02308	0	155.325	151.858	139.293
P00761	Trypsin	1724.5	1465.4	1605.8	1226.2	1069.3	945.8	3	3	1157.99	1230.56	1230.72	2225	1910.37	1693.35
P00883	Fructose-bisphosphate aldolase A	2	NaN	0.7	307.9	311.1	317.7	2	3	1.34299	0	0.536494	558.699	555.799	568.808
P00921	Carbonic anhydrase 2	17.4	NaN	24.4	427	416.3	382.4	2	3	11.684	0	18.7007	774.812	743.746	684.646
P00974	Pancreatic trypsin inhibitor	1878.6	1817.5	2252.2	38.6	NaN	NaN	3	1	1261.47	1526.24	1726.13	70.0415	0	0
P02533	Keratin, type I cytoskeletal 14	400.9	238.9	312.8	696.3	675.5	719.3	3	3	269.202	200.615	239.736	1263.47	1206.82	1287.83
P02538	Keratin, type II cytoskeletal 6A	54.2	62.4	24.2	878.9	850.5	878.4	3	3	36.395	52.4001	18.5474	1594.81	1519.47	1572.68
P02602	Myosin light chain 1/3, skeletal muscle isoform	NaN	NaN	NaN	163	168.4	167.2	0	3	0	0	0	295.771	300.857	299.354
P02662	Alpha-S1-casein	NaN	3.6	NaN	53.9	53	55.7	1	3	0	3.02308	0	97.8041	94.6878	99.7249
P02663	Alpha-S2-casein	10.2	22.3	9.3	161.9	158.4	139.4	3	3	6.84925	18.7263	7.12771	293.775	282.991	249.581
P02666	Beta-casein	NaN	1	NaN	44.3	51.4	45.1	1	3	0	0.839745	0	80.3844	91.8293	80.7467
P02668	Kappa-casein	NaN	16	NaN	106	24.6	27	1	3	0	13.4359	0	192.342	43.9494	48.3406
P02754	Beta-lactoglobulin	24.2	56.8	18.9	91.8	90.1	89.3	3	3	16.2502	47.6975	14.4853	166.575	160.969	159.882
P02769	Albumin	12808.3	8340	9125.8	65476.2	65758.2	68783.2	3	3	8600.71	7003.47	6994.2	118810	117481	123149
P04259	Keratin, type II cytoskeletal 6B	1.3	2.5	2.1	159.5	168.5	165	3	3	0.872943	2.09936	1.60948	289.42	301.036	295.415
P04264	Keratin, type II cytoskeletal 1	392.7	448.6	379.3	2008.2	2065.6	2070.4	3	3	263.696	376.709	290.703	3643.97	3690.32	3706.83
P08670	Vimentin	NaN	1.6	NaN	34.4	33.2	34.5	1	3	0	1.34359	0	62.4204	59.3139	61.7685
P08779	Keratin, type I cytoskeletal 16	12.7	8.3	15.2	154.6	160.6	173.6	3	3	8.52799	6.96988	11.6496	280.529	286.922	310.812
Q9BYT5	Keratin-associated protein 2-3;Keratin-associated protein 2-4;Keratin-associated protein 2-2;Keratin-associated protein 2-1	NaN	NaN	NaN	309.8;309.8;309.8;309.8	318.8;318.8;318.8;318.8	366.3;366.3;366.3;366.3	0	3	0	0	0	562.147	569.556	655.821
P11532-13	Isoform 6 of Dystrophin;Isoform 7 of Dystrophin;Isoform 8 of Dystrophin;Isoform 9 of Dystrophin;Isoform 10 of Dystrophin	NaN	NaN	NaN	5.2;5.6;5.1;5.1;5.5	5.8;6.3;5.8;5.8;6.2	5.9;6.4;5.8;5.8;6.3	0	3	0	0	0	10.1615	11.2553	11.4585
P13645	Keratin, type I cytoskeletal 10	200.8	211.8	196.8	1281.1	1341.1	1314.2	3	3	134.836	177.858	150.831	2324.62	2395.96	2352.93
P13647	Keratin, type II cytoskeletal 5	18.2	23.7	20.2	161.4	162.1	150.9	3	3	12.2212	19.9019	15.4817	292.868	289.602	270.17
P15924	Desmoplakin	5.1	4.4	4	17.9	32.5	23.2	3	3	3.42462	3.69488	3.06568	32.4804	58.0633	41.5371
P20930	Filaggrin	1.1	1	0.9	1	0.8	1	3	3	0.738644	0.839745	0.689778	1.81455	1.42925	1.79039
P35527	Keratin, type I cytoskeletal 9	523.2	519.3	529.1	1382.7	1336.5	1334.4	3	3	351.326	436.079	405.513	2508.97	2387.74	2389.1
P35908	Keratin, type II cytoskeletal 2 epidermal	219	301.7	255	583.5	619	601.1	3	3	147.057	253.351	195.437	1058.79	1105.88	1076.2
P78385	Keratin, type II cuticular Hb3	NaN	NaN	NaN	4.3	4.5	5.4	0	3	0	0	0	7.80255	8.03953	9.66812
P78386	Keratin, type II cuticular Hb5	NaN	0.6	0.6	325.3	333.4	332.7	2	3	0	0.503847	0.459852	590.272	595.64	595.664
Q04695	Keratin, type I cytoskeletal 17	NaN	NaN	NaN	29.6	32.6	28.5	0	3	0	0	0	53.7106	58.2419	51.0262
Q8IUG1	Keratin-associated protein 1-1;Keratin-associated protein 1-3	NaN	NaN	NaN	245;734.9	213.6;640.9	270.2;810.6	0	3	0	0	0	1333.51	1145.01	1451.29
Q14525	Keratin, type I cuticular Ha3-II	NaN	NaN	NaN	17.5	23.7	21.3	0	3	0	0	0	31.7546	42.3415	38.1354
Q14532	Keratin, type I cuticular Ha2	NaN	NaN	NaN	7.6	7	9.4	0	3	0	0	0	13.7906	12.5059	16.8297
Q15323	Keratin, type I cuticular Ha1	11.6	NaN	NaN	988.8	1010.5	1106.5	1	3	7.78934	0	0	1794.22	1805.32	1981.07
Q3LI61	Keratin-associated protein 20-2	NaN	NaN	NaN	47.2	42.5	57.5	0	3	0	0	0	85.6466	75.9289	102.948
Q3LI64	Keratin-associated protein 6-1	NaN	NaN	NaN	61.3	53	58.7	0	3	0	0	0	111.232	94.6878	105.096
Q3LI72	Keratin-associated protein 19-5	NaN	NaN	NaN	90.7	95.9	135.9	0	3	0	0	0	164.579	171.331	243.314
Q3LI83	Keratin-associated protein 24-1	NaN	NaN	NaN	25.3	31.9	37.4	0	3	0	0	0	45.908	56.9913	66.9607
Q52LG2	Keratin-associated protein 13-2	NaN	NaN	NaN	45.8	41.6	56.2	0	3	0	0	0	83.1063	74.321	100.62
Q6A163	Keratin, type I cytoskeletal 39	NaN	NaN	NaN	6.9	6.3	6.2	0	3	0	0	0	12.5204	11.2553	11.1004
Q7Z794	Keratin, type II cytoskeletal 1b	NaN	NaN	NaN	9.8	12.4	16.4	0	3	0	0	0	17.7826	22.1534	29.3624
Q8IUC0	Keratin-associated protein 13-1	NaN	NaN	NaN	19.5	19.9	23	0	3	0	0	0	35.3837	35.5526	41.179
Q8IUC1	Keratin-associated protein 11-1	NaN	NaN	NaN	176.8	175.3	231.8	0	3	0	0	0	320.812	313.184	415.013
Q8N1N4	Keratin, type II cytoskeletal 78	5.3	4.7	NaN	223.8	210.5	223	2	3	3.55892	3.9468	0	406.096	376.071	399.257
Q92764	Keratin, type I cuticular Ha5	NaN	NaN	NaN	16.8	17.9	17.8	0	3	0	0	0	30.4844	31.9795	31.869
Q92817	Envoplakin	3.2	3.1	0.8	2	4.4	2.1	3	3	2.14878	2.60321	0.613136	3.62909	7.86087	3.75982
Q9BYP9	Keratin-associated protein 9-9;Isoform 2 of Keratin-associated protein 9-9;Keratin-associated protein 9-2	NaN	NaN	NaN	525.8;631;631	487.2;584.6;584.6	834.7;1001.7;1001.7	0	3	0	0	0	954.089	870.413	1494.44
Q9BYR3	Keratin-associated protein 4-4	NaN	NaN	NaN	94.4	90.2	140.8	0	3	0	0	0	171.293	161.148	252.087
Q9BYR4	Keratin-associated protein 4-3	1.6	NaN	NaN	104.4	113.4	115.4	1	3	1.07439	0	0	189.439	202.596	206.611
Q9BYR6	Keratin-associated protein 3-3	NaN	NaN	NaN	3292	3469	3960	0	3	0	0	0	5973.49	6197.58	7089.95
Q9BYR8	Keratin-associated protein 3-1	NaN	NaN	NaN	5487.4	5817.5	6874.8	0	3	0	0	0	9957.15	10393.3	12308.6
Q9BYS1	Keratin-associated protein 1-5	NaN	NaN	NaN	71.6	66.6	106.3	0	3	0	0	0	129.922	118.985	190.319
Q9NSB2	Keratin, type II cuticular Hb4	4.2	3.4	3.1	33.8	34.7	36.4	3	3	2.82028	2.85513	2.3759	61.3317	61.9937	65.1703
Q9NSB4	Keratin, type II cuticular Hb2	NaN	NaN	NaN	37.5	30.4	34.5	0	3	0	0	0	68.0455	54.3115	61.7685

## Sheet: Mbovis PG45 proteomics
Leading_Protein	PG.ProteinDescriptions	IBAQ Bac_Mbovis_PG45_1	IBAQ Bac_Mbovis_PG45_2	IBAQ Bac_Mbovis_PG45_3	IBAQ EV_Mbovis_PG45_1	IBAQ EV_Mbovis_PG45_2	IBAQ EV_Mbovis_PG45_3	Seen in # reps in Bac	Seen in # reps in EV	rAbu Bac_Mbovis_PG45_1	rAbu Bac_Mbovis_PG45_2	rAbu Bac_Mbovis_PG45_3	rAbu EV_Mbovis_PG45_1	rAbu EV_Mbovis_PG45_2	rAbu EV_Mbovis_PG45_3	amino acid sequence
312950074	putative membrane protein [Mycoplasmopsis bovis PG45]	28.4	18.5	14.3	424.9	310.4	365.8	3	3	56.4912	36.1542	26.0752	1149.32	912.951	1170.04	MTNLKIIKRKKLLKKLHSENVNNLKLIELDKEDIDLRKYFGDDLMANLRMANYTYYTDSANKRKKNVRKRTAILYAKRIFFIFIAALIFNFGVIAFLNRGDTLPSGLSGFPMLAVLIAKDKGYRDWDKYFALMFILINLPLLIGFGFKVKKSFTILTTVFMVSQLITNAIFTSIPQVHNFIHNYINIAPGWHKLVEFRDKAGNIIGTYENSSSWPIIINGFLGSICAGTSIAIAWKNGGSTGGADIIAYYFSTKKQKSVAGMMFTVNIIATSFFLLVFGIAARHKEAVDLGVISSSSSVESVLEQPNSIIITLKDGFTINSIKKYVSHRTIFGLREFSTILYIIFNNIVLGLMYPKYKKVTLSIATKCPDTIINYFKHIKYWHAYTIFKGISGYSQEET…
312950075	putative membrane protein [Mycoplasmopsis bovis PG45]	39.7	28.5	28.8	NaN	NaN	NaN	3	0	78.9683	55.697	52.5151	0	0	0	MNNLSLSAQSSLWALFQLKSSKKRNFLIFVVLLPIIFLLSCFIVDIVLNSINFIQYFEFNSKNIKAEFIESMHAYSSVKVVFIVFFSVIHLLIVLPGLKKLILSENELKKSNDNSLAKHIKESNATGKQISSLLIVQFWVDMFWYLTYIVIAFLDFMNLQFIYNNPNLSDAYPDQVSFGINLGFAISALIKIIIIDNVIPLVFHKKPKNYVVNGNAANYLWLYIIWISGFMFLVLTHIAGLHLKIISWVFIYSSPVIITPLMFLLTYIIKAIYIIKLNKHNRTALTFVSAFLVLFSYE
312950076	cytidine deaminase [Mycoplasmopsis bovis PG45]	1423.6	1636.5	1559.5	151.8	138.6	143	3	3	2831.72	3198.18	2843.66	410.606	407.651	457.396	MMVDKLKELLKYAYCPWSHFQVAAIAISEEGKEYPGVNVENAAFPSGLCAERSALFGSVAHGAKVGTFKEIHIISSSNEIISPCAGCRQVLSEFMGDDSLIYQYNNSGDKVRVNKLIELVPYPIRTEQIKS
312950793	putative lipoprotein (ICEB-2 encoded) [Mycoplasmopsis bovis PG45];putative lipoprotein (ICEB-1 encoded) [Mycoplasmopsis bovis PG45]	104.1;104.1	72.7;72.7	87.4;87.4	124;124	91.8;91.8	107.2;107.2	3	3	207.068	142.076	159.369	335.41	270.003	342.887	MNSIDKKYSEEIAKLKQEVYDANMLLVKYNLVIHTWGNVSGITKDRKYMVIKPSGVDYATLKPEDMVITDMENNVYDSKYKPSSDTPTHTLLYKNNPEIQGIVHTHSTNAVAFAQAGKDIPCFGTTHADNFYGPVPCARALSPEEINGAYEHNTGLVIIETFNNRKLDWKATSATLVKEHGPFVWSFKSPKDAVDLALTLEEIAKMAIKTLIISNNSAQEAQKALIEKHYYRKHGKNAYYGQK
312950078	putative L-ribulose-5-phosphate 4-epimerase [Mycoplasmopsis bovis PG45];L-ribulose-5-phosphate 4-epimerase [Mycoplasmopsis bovis]	85.4;85.4	91.4;91.4	91.5;91.5	14.6;14.6	12.1;12.1	5.6;5.6	3	3	169.871	178.621	166.845	39.4918	35.5886	17.912	MAKEKFVRTVLGDVPAETIGITDCHDHLIKNGGPEMHEHPDFLMIDVEAAKKEVQEYVNHGGKTIVTMDPPNVGRDVYRMLEIAEAFKGKANIVMSTGFHKAAFYDKYSSWLACVPTDDIVKMMVAEVEEGMDEYNYNGPVVKRSKAKAGIIKAGTGYAAIDRLELKALEVAARTSITTGCPILVHTQLGTMALEVAKHLIGFGANPRKIQLSHLNKNPDRYYYEKIIKETGVTICFDGPDRVKYYPDSLLADHIKYLVDKGLQKHITLSLDAGRILYQRNYGLTKGKETFGFAYLFERFIPLLKQVGVSQEAIDDILINNPREILAFDEPRVYDSSKVSAEVVQLKKDLKLA
312950080	phosphotriesterase family protein [Mycoplasmopsis bovis PG45]	608.3	684.7	636.6	114.7	63.4	123	3	3	1209.99	1338.09	1160.8	310.254	186.473	393.425	MTAESKCTKSCASSCEASKSSCASSCASESSCKASCPKSECSQEKVCSSWKDEGLKYEGEVADEFDLIVVGSGPGGYLAAEMAGKAGLKTLIVEKEFWGGVCLNIGCIPTKAMLRSTHALEEVIHAAKFGVVANLEDLKIDYQQSWVKMHERKAKVVAKLSGGVKFLMKASKVQTEEGVAKFVGAREIEVNGKVYRGKNVILATGSHANRMKFLEGFEKGYESGKLMTSREAINNDKSLPESMVIVGGGVIGVEFAQMYASMGTKVTIIQREDRLLPGIDKEIVDEFAKILKTESKIEVIYGATSTKLEGDENLIYTKDGKEEKITAEVILIATGRVPASEGLAEVGIELGARREVKVDKFLRTNVKGVYAIGDVTNQNMLAHVAYIHAVTAVHHILDL…
312950081	pyruvate dehydrogenase complex, E3 component, dihydrolipoamide dehydrogenase [Mycoplasmopsis bovis PG45]	6321.4	7088.6	7239.5	364.3	311.6	319.1	3	3	12574.1	13853.1	13200.8	985.401	916.481	1020.66	MENQKQKNQNSYFTDSISEISGKLVEQKQLVDFDNRFKRKLKWHQKLFNIKSPWIASMLKAFAVILEFFVIAFIVITITFFLINSVPGGTGLTAGLDEAAKRAVEEKYGLNQPLIIRYGIYLKNIIHLDFGISLSVFPGEKINDFVWVRFYKSFLIGIFSVMLTLVMGIPLGVYVGMNPDKLPDHIATLVVSIFSSIPSLVFALWLLLIGRKLNLPYIFNEKDISTYVLPGLALSLGSIIVYIKYIRTELNRELNSQHCKFCYLKGITKRRFVWTHALKPALFPIATFFPVVIFGSFIGSVFIEQIFFITGSGGLLLNAITSKDFNIILFMVTLFSLLTILSYTCRDALYKIIDPRVRRRG
312950082	oligopeptide ABC transporter, permease protein [Mycoplasmopsis bovis PG45]	29.3	20.8	32.5	34.4	20.6	38.2	3	3	58.2814	40.649	59.2619	93.0491	60.5889	122.185	MAIPVEIRQVERPKNTVVKNYFGKFKVVKRTSKYVNGKAIPKDLAIVGEIVDYKFVPFETPIPVGTRSKKNQEKTDIKDYGNIAIFTKNSNDILEKLLTHFDSSTAYKLYVIAILRCAYPKAVNRDLKFYYETSFMSELFKKVGLSESLLPDFFEKTGRAYSNIHNFMLDRINEFKGRVQIIDGTLKSYNSDEVTFSQWSRKGKVKGSKDFTLLYTCVLYTKEPIYHRPYQGNMLDSTIFEDFLENVPSTGEILVADKGFRTKAITELLEQNKNVKYLLPLKRNTTLIREEKLDENLTPVKIKDKQLLGSKKQINGKFFYLFKDLEIAGKESVGNYQKHLKRNTFNIDEFNKNNQFFGVIVFESNVDLSLEDVYTLYDQRWEIEEMFNFYKNILELSKT…
312950083	ISMbov4, transposase [Mycoplasmopsis bovis PG45];ISMbov4, transposase [Mycoplasmopsis bovis PG45];ISMbov4, transposase [Mycoplasmopsis bovis PG45];ISMbov4, transposase (ICEB-2 encoded) [Mycoplasmopsis bovis PG45];ISMbov4, transposase [Mycoplasmopsis bovis PG45];ISMbov4, transposase [Mycoplasmopsis bovis PG45]	277.6;277.6;277.6;277.6;277.6;277.6	237.3;237.3;237.3;237.3;237.3;237.3	275.9;275.9;275.9;275.9;275.9;275.9	73;73;73;73;73;73	65.4;65.4;65.4;65.4;65.4;65.4	62.4;62.4;62.4;62.4;62.4;62.4	3	3	552.182	463.75	503.088	197.459	192.355	199.591	MDFEKRLKGIVNTLPKTKILLIDGSDQRSIEAANKLAEFNNLEITLLVENDHKIDTRANVVNMNKDANKLELLAQKYVELRKGKEDIEAARKVLSTRPFYAMMLLATGEVDGVVGGLNYSTADILRAAFKAIGPKPGIKTISSVMIMHKEEKLYFFSDISVNPKPDLTGLVDIATNAAEFAKAFIEEPKVAFLSFSTSGSAVTPETKLVADATVEFNKVYQGTKAIGEVQLDAAVNEGVRKSKYKGETFTGEANVLVFPDLGAGNIGYKIAQRFGGFGAIGPIITGVKKPVNDLSRGSLTDDVVNTVLITAIQANDKE
312950084	phosphate acetyltransferase [Mycoplasmopsis bovis PG45]	2618.5	2786.4	3098.9	481.4	470.9	417.3	3	3	5208.53	5445.4	5650.67	1302.15	1385.02	1334.76	MNEKIRLEDDFYESVNGEWLEKAQIPADKSSISSFYEIHNQSEKNLMKETADLIAEKNISRKRIKDPVLLNYALFADMAYDFKTREKHGVSPILPTLKAISSLKNKEQLIEKYKYFRFRDIALPFEFGIIQDFKNVEEQVLCISGPSLILPEKSYYDDKHPAKELLISKFKEMSLKLLKFYYSDEQKNEKIIDQALAFDSSLVEFSPSAEENADYVKLYNPYSISDVVTLSKNADLKAIAENLVNKNSKSITNVVDKLIVFYPKFLENIDKVFNDENFENIKSWMFLKTIIQYSSLLNDESRVIAGEFDRTLTGQDSPMTKEKHAFYIAYNKFKIPFGTYFAKKTFSEKAKANVEQMVTKMIGIYRDRLLKNDWLSKSTKEKAVVKLDALGVHIGYPKE…
312950087	neprilysin [Mycoplasmopsis bovis PG45];M13-type metalloendopeptidase [Mycoplasmopsis bovis]	546.7;546.7	620.7;620.7	782.6;782.6	849.2;849.2	894.3;894.3	810.6;810.6	3	3	1087.46	1213.02	1427.03	2297.02	2630.32	2592.76	MDNNVKLINNIYSNNLIKPILGCEKFYNIAQLGNSNIELIYSNSASTDWLINNDHDEVAILVQGSASLLDDSHKKINMQAGDCLFVKKNSRHKILSTSADAIWISIHNKE
312950088	conserved hypothetical protein [Mycoplasmopsis bovis PG45]	113.7	142.8	115.7	NaN	1.7	3.2	3	2	226.164	279.071	210.972	0	5.00005	10.2354	MGNKITKEKLGSKIWDAANQLRDKLEPHEYKDYVLGLVFYKFLCEKQTNYLIKNWITSDQLKYLDSKYLDNESNFNAIVSGDAYKSDYENLVDAKKDCIDENGYFIDYSNLFSSWLENKNEFNIQKFQLAFNNFNNSVNDEHKSLFKDLFVKFERDLSKLGSDTNEQTKKISSLLDIINDIPSTNQDYDVLGYIYEYLIARFASSAGKKAGEFYTPHKVSELMSKIIAYHLKDREVIKVYDPTSGSGSLLITIGHEFKKYNNGDSPVSYYAQELKAEVFNLTRMNLIMKNISPTEIHARNGDTLEQDWPMFEDNDFSSYKHLSVDAVVSNPPYSQKWNSKEHSLDPRYVEYGIAPESKADYAFLLHDLYHVQPDGIMAIVLPHGVLFRGNSEGQIRKNL…
312950090	type I restriction-modification system, M subunit [Mycoplasmopsis bovis PG45]	15.7	16.3	17.9	NaN	NaN	NaN	3	0	31.2293	31.8548	32.6396	0	0	0	MIQKNRKKSKNSDINNPKISVLIPCFNIERNSYFSLKNVLKSTYKNLEIILLNDYSTDNTLQIINDYATKDSRIKVYDLKDYHEHVGIGFNRHFLIEKSTGKYFIFVDDDDKLHRNGIKIFVDNLDDDYDVLVAEALYSFEAFKNFRVLVPETPRFTGYDTNSPIEHYYNNILVPWGKMIKRSFYCKIVEKYNKKFSGGIYEDVRFMHMLFFTNPKFKKIKKKVYTYQIRKNSSATNLEAWANKLKLLFSSYEGVFNEITELRLLPNEKIINLMKKCLFVQLTSLCYLLCSLQTRNKKKAMREFSTTMLKEFIKNNNVDVSPPANLSLLSLTIYKSSIKYFKL
312950092	glycosyltransferase, group 2 family [Mycoplasmopsis bovis PG45]	33.8	23.4	35.8	10.2	13.3	19.1	3	3	67.2325	45.7301	65.2792	27.5902	39.1181	61.0927	MGKKKTPFFERLLQKNAEQENKNKTTGKSKKSRSWKIATTSTVLVLAVATGITVPLVINSTKKNFIDGYASNTNVASAKIGDHNLDLNFGDFKDIYQNHNTSTSEERLKEIDKIILYYLYDQEQKASAEYQKLWNDSKRSDEKDNNSFRLPTLDELKTKFKNELVDIENNMKLQFGTANWQTEFNKHLVQKYNGAKNIDEAVKNKTFEHIKSDALRRFRLTNGDSKKDEIERKGKDGKHVFDWWHKDKKESKFIELEDKSKLALATDSFVFKDSYKSIDPFIDSYIANEKPRIISEFTIPGIAPAKKNEKWKIDKNIFLRYLFYAKKGTFGLSKVTEGYNVVKEKFNSFDHYIKSVVGNPNGNNILPDEAIQYSSILNMFSTSKDDIKKNWGTSGLTSI…
312950093	putative membrane protein [Mycoplasmopsis bovis PG45]	351.9	385.8	475.8	389	219.1	267.7	3	3	699.974	753.961	867.594	1052.21	644.419	856.258	MYIKANADSYALALYDLHKEEDSVSSTYENILSFYELLCNDRAISSFFNSSKIAVEKKCELANEIVQYDEKLKTFANFLKLLIAKNNSSLLQQALSIYIHIVEDDLNIIRAKLISAFEIDNELKIKIIQKLEQKYNKKIVLNTYIDKSLIFGFKIVIGNDIIEHNAKADLEKISSLINDKNGGLNG
312950094	ATP synthase F1, delta subunit [Mycoplasmopsis bovis PG45]	42.7	42.9	49.2	2.6	3.8	3.8	3	3	84.9357	83.8386	89.7134	7.03278	11.1766	12.1546	MLLSSQNNGGIKEELKDKFRALFPTWPMFLATIIAFVLVVVILWFLLHKPIKKAMKERHDYIQKNIDEAKLTNDISKQKLNEANKRLAEAYSEADELIKNAKIHGENVIEEYVHKARNESKRIIDKAHTEIESERQKMIDDSKSNIAKAAIEISKKIMQKEVTKESQDEVINNFLKDN
312950095	ATP synthase F0, B subunit [Mycoplasmopsis bovis PG45]	140.9	95.9	105.7	51.6	48.2	46.5	3	3	280.268	187.415	192.738	139.574	141.766	148.734	MRMQEKDLKDIMDSIQKLTKIKINPESTFQELKIDSLSLAELVFDLEEKYNVMIPDDDLKNIKKVKDVEVVFNKLLK
312950096	putative acyl carrier protein [Mycoplasmopsis bovis PG45]	572.3	625.5	662.3	503.3	939.3	132.8	3	3	1138.38	1222.4	1207.67	1361.38	2762.68	424.771	MKKMNLIAMAGGLSFLAASPLLAISCGNTSPYQNTVVDEKKEDIAKSWDKEISITNGWINNGFLKTKLETDFLDLLGKRFNDLKNKDSKTKDLPDVKFVIKTDRGGKYFTKLTSDNKENDLYISNYTQYINELWKDGKFNEKFAPKLVSQASTLKFTWSSDDNDLYSDGSSKDKLRLHADKNNIKWTKVLGKEYPEWHEITGEGKKLHFDGSKYTNFYEKKDVTYIYHGAVYISGNKATRDAIVKAWNEKKWDDFYKHGISFEETNSAGKYKYQVALFARHFGKTVQEINKFLAENDEYVVRGKSAKDSLGKETEDKTGKKKLTPHISFDDEGAYNWTLSKKTSTKYRPSKFNEGKSYDDAENDVVRVLTLTNPAPYDMVLARVGLSNTQVNLISKALQ…
312950097	putative lipoprotein (ABC transporter, substrate-binding) [Mycoplasmopsis bovis PG45]	212.5	158.6	197.6	370.6	248.6	338.6	3	3	422.689	309.949	360.312	1002.44	731.184	1083.04	MFKYISKRIAMAILTLFIVIIFSYTLLAAFGKNPYEGIEAEYINNARPGDVVLEQIKRDAENYRNTPVLVKLFNYLGGLFKGDFGTLYGKIKGQNAFGQSVVAVFWEYMPNSLFVSLPAFIVSALLGTTLGIVAGYKRGTIWDSIINVFVFIFIAVPSFIIAPMFINLFTKLGFPTTYTAWVRNDSSGVNSFANFFKSIIPPILVVSLSSMAVYTLYARNQTVTVLTSNYVLIAKTKGLSTMQIFRKYVFRNISIPLSAIILPSYIGLLSGSIIVERFWGVEGTAMILAFAFPNAEINLVMYSIILFTSLSVFTDILVDISFVILDPRIVYGSNSGVNYLHIFKAYLIRKRRLKELFKEQEESTIINEEVNAN
312950098	oligopeptide ABC transporter, permease protein [Mycoplasmopsis bovis PG45]	42.2	29.6	45.9	44.5	36	37.4	3	3	83.9411	57.8467	83.696	120.369	105.884	119.627	MKKNKFYLFLGAAPVLSVPLVAASCGDKYFKETEVDGVKTVTTLSHIVSRKGLKLRDGLTVDNAPRAAFITDEGSVHDESFNQSGWEAVHKISYELGLDKAQVSGNKNLRNKVYEPKKGELASSYKNAIDSSFRYIVLCGFTHKAALYGLEPEYIKKIKDNNIVFITVDFDIQQDASTGEPAAKAFVDKIGQGRLIPVIFDTKQAAYIAGRALADYFSKIYKDNPEKRTIGAFGGIPWPAVSDFIAGTFQGIIDWNKEHPEAKTKSLNNTIELKTSFTSGEPVAVAAINSVIKATASYPVAGSLSSDTAKEIKKLGDKNKFIIGVDADQKNALKGHRIFTSVMKLIGQAVYNVLADLYSQGENSLSLQPGFEIGKKNGEAKVFGYGENEASKYVGVATS…
312950100	P48 lipoprotein [Mycoplasmopsis bovis PG45]	6137.3	4768.9	5717.2	4967.7	4021	4610.4	3	3	12207.9	9319.76	10425	13437.2	11826.6	14746.7	MNKLDLKEKLENKLREIASDLGIQRNVFLTESKKHGDLSTNMALGNSNLNPMELARKIISMIDAGEFGIKNMTVANPGFINFSIGDDYLVSGVNQILHLGSNYGKGNKLGKVNVEFISANPTGFLHVGHARNAAVGSTIANILEFAGYSVNREYYINDAGNQINVLANSLWARYKQIFYPDFQMPEESYKGEDIIWGAQKFYEKYKDKYKDCELDTELIKLVKEEAISIFMAKIQEDLANFGVKFDTYFSEKSLYENDGAKIKETIKNLKNAYESDGALWLKTTIHGDDKDRVLVKSDGSYTYFLPDIVYHQDKYRRMGKDATIINVWGADHSGYVKRMQCAVRDLGLNDNNLVVLCMQLVRLIKNGEEFKMSKRKGTSFFLSEFVKMVGKDSARFLLL…
312950101	arginine--tRNA ligase [Mycoplasmopsis bovis PG45]	134.6	163.3	143	1.1	1	20.1	3	3	267.736	319.134	260.752	2.97541	2.94121	64.2913	MNKNNKYVTPSLLNVEPENRLNMANTLINEGIKWIHYDVMDGKFVPNFAIELNEIKNIHENSLKHFKDAHLMIENPLDYIDQYKDVVDIVTVHYEAIDPTKFLKFLKQKHHDYRLGIAIKPNTDVEKIKKFLPYIQLVLVMSVEPGKGGQKFIPTAIDKIKMLKQLRINNNYDYLIQVDGGINDTTGPECFKAGADACVAGTFMVSNPTKARINSILGVK
312950103	putative ribulose-phosphate 3-epimerase [Mycoplasmopsis bovis PG45]	1173.9	1197.9	1398.2	73.7	31.5	66.5	3	3	2335.04	2341.03	2549.54	199.352	92.6481	212.705	MHTTSKFSAYISSLLKEKCQKQILSVLFIDGDDKRAREAALYFKKNNLAKPIMLLENESQVVDDGLENIILSKEEESIKAYANELVKIRNGKEDYETCLKNMHTRPYYGAMMIKLKDVDSAVGGLIYSTADILRAAFKCIGAKPGIKTISSVIVMHKDDEQLIFTDPSTVQKPNAEQLVDIATNAISFANMMNMNSLGAFLTYSTNNSGKGENPDLVREAAKIATERGLNVINGEMQFDSAYDLNVRKAKFPSAVQKETGVFIFPNLESCNIGCKIAQRMGKYGAVGAILQGINGAINDFSRGATVADVIDVTSITILNGYTFK
312950105	phosphate acetyltransferase [Mycoplasmopsis bovis PG45]	88.1	96.4	115.6	NaN	NaN	NaN	3	0	175.242	188.393	210.79	0	0	0	MSNIKTNIIINADCIDALKQLPDNSIDLIFADPPYWMRTSNTLLRVEGTKFNGVEDEWDKFESNEDYAKFTKNWLSECYRVLKKNGSFWVIGGMQCIYTIGGIMQELGFWIINDVIWHKTNPTPNFKGTRLQNSHETLIWATKNQSSKYTFNYKTAKELNINVADYNKGNRKQLGSVWSISVVNGNERLKDNEGIKLHSTQKPEELLYKIINISSKINDIVLDPFAGTMTTGKVAKQTGRKYIMIEQDEKYCHYGTNRIEKTKEKIGDIELATFDIKPLKVGLKDMIENSFLHIGEQFYLKNINHKNVYLNSDGKLTDDNGQTLDIHSGAAQLSNKKAHRVNGFDYWYVIRENKLVSINEIRELYREHLSKESI
312950107	site-specific DNA-methyltransferase (adenine-specific) [Mycoplasmopsis bovis PG45]	87.4	91.2	114.8	8.9	NaN	0.9	3	2	173.85	178.23	209.331	24.0738	0	2.87872	MSNKKKVILGMSGGVDSSVCAYLLLKQGYEVEGLFMRNWDSMLNNDFLGNENISQDICPQEQDYHDALEVANKLGIKLHRVDFVNEYWNDVFKTFISEYEAGRTPNPDILCNKYIKFKAFSDYAFNNLGADYIAMGHYAKVTDGRLYRAKDQNKDQTYFLAQLSHEQLKRVLMPLAEFNSKEEVRKIAQEQGLITASKKDSTGICFIGERKFTKFLQNYIPMQPGDIVDIRTNNKLGKHEGCFYYTIGQRKGLNLGGQAEPYYVCGHDVKKNILYVAPSSDLSYLTSDALLATGLTLNHNDFDHNNLSAKFRYRQENIPVTIELLPNNTIKVYYPSEAQAVTPGQQVVIYEGQKCLGGAVIEKIYYKGSEKTYL
312950108	tRNA (5-methylaminomethyl-2-thiouridylate)-methyltransferase [Mycoplasmopsis bovis PG45]	148.3	153.1	152	5.5	NaN	NaN	3	1	294.987	299.2	277.163	14.877	0	0	MKYRPIHNRETMEIVQSNRDVSFATEAKKTYRDPMNQFSPRMYKVIKSEKKIKSFMIFISLFIFFASVTFFILTWYKVPPFKVNNGDKPLIGYLVLFSIVAFISFANTIKNAIEKRQWSNTVQRHREAISAGDYTSSSTFHLVYKRIVLKDINLLWILIFILTYLGLITLIIFGLYKSGNWEAGSRDGSFYINLEWPKWLDKSFKNTQLFCLICTIIMAALIVAYVVIRLIDKKRLDDIGDFFGEKSVEIHDQIETAKSNRNKMWLRVYLVVVALTIFLPLALIFVAIWKGILRRKKSVVGA
312950109	putative membrane protein [Mycoplasmopsis bovis PG45]	53.2	42.6	33.5	70.3	84.5	66.7	3	3	105.822	83.2523	61.0853	190.156	248.532	213.345	MSIIYKYDYVFKDNNNSEENIIFCHGFNSSPNSFKIFENYWTKSNYYALQFPGNNHTEIKEADDATVECYSDLLINFIEDNKLKNIILIGHSMGGGTISLAYQKKPELFKKLIYLAPTNKSSQNVTEAFLRDYFPKNFDEFIGFFKSLYYDVSKFTSNESWMRLVKNTFDPYDFNNSTITKLGQYLISNEFHDKLELALKSVNIPALLILGEDDGVVDRDLCLEYFKENVKNVKALWMPKTGHMMFEEDWDNFIKIVEEFLNS
312950110	lipase/esterase LIP3/BchO family [Mycoplasmopsis bovis PG45];alpha/beta fold hydrolase [Mycoplasmopsis bovis]	37.8;37.8	39.8;39.8	48.7;48.7	NaN	NaN	NaN	3	0	75.189	77.7803	88.8016	0	0	0	MSRVGNRILTIPEKVSLTQDGTLLTIEGPLGKLQRNISPLIALKVENNQISTIRANEEKSTKQLHGTTNALISNMLIGVSKGYKKELVIKGVGFKFTLKGDVLEVSAGYSHLVNLDVPAGIKVEVPKPVELVISGIDKEIVGQFAAVVRAVRKPIPYSGKGIAYKDEVIRRKEGKTASK
312950111	ribosomal protein L6 [Mycoplasmopsis bovis PG45]	3128.8	3436.4	3892.7	202.4	227.2	181.8	3	3	6223.58	6715.69	7098.11	547.475	668.243	581.501	MSKIYIVGTPIGNLKDITYRAIETLRKVDWIACEDTRVTSKLLSAYDIKKPLVIHNKNNEKSSAKSIINKLISNNQSIALVSDAGMPLVNDPGFEIVKLANANNIDIEIIPGVSASITAFALSGLSSTFLYMGFPKEKEGQRLKQIESFGTEHAYVFYVGNSKIEKFLSEIYKVWNNDATVFLAREMTKIHEQFYSGNANDVLEELKNSSAKGEFTIVIKIEETKREKVNKYAAFSKVKYS
312950112	tetrapyrrole methylase family protein [Mycoplasmopsis bovis PG45]	35.1	40	45.2	NaN	NaN	3.9	3	1	69.8183	78.1712	82.4196	0	0	12.4744	MLGIITALFLVTLFIIITLVIWIFTSKKKTQTKTRGKIFEETIKEKMISIASSKNFHYLDGGLFKYADNNYFELDGILISNKAVYISEAKRYIGHLHGGFFDDYLLLKDDKKEIRVKNPFNQNYRHIRHFINMCKINVPIFSLIIFPDSTSLDIDKQEPSTIIASKSNVDLLLDEVETYMVDEPDLEVSKINLVIDAINENRAQSTSDNIKFNQIISQNNENQYFNRT
312950113	putative membrane protein [Mycoplasmopsis bovis PG45]	33.2	22.2	24.4	130.9	95.3	137.9	3	3	66.039	43.385	44.492	354.074	280.297	441.083	MDTINIILLIFAIVIVFLLITILALIIVKSRSLKSNSNSELSDRSILFINDKFNETKEAIGNKISLLEKYLIKELSDNNASLNGKVVNFEKNINELITKKDSERIKTFNDFKSQFATELNDRIAKLAEWLSNFDKQFTKTVSDNLKEINESNIKSFNEIKANIDKHFEDTLTKHIKEQFGNIQSQMDKVGKEMVKFEQMQASVDDLNRTFSNNKKTGDFGEFTLEQILEEHYPNEKNRLWFKQYQINPGKNQEAVDFAMKIKVKSESEEIEQIIPIDCKFPKEKWDRYLDSKSINDKEWYLKELKKAIKEMAQSINEKYIKPDKKTTPFALMYVPSASVYLTLVQDISFITEIQDKLKVYIQGPQIIMVFIYSYLLQNNSFQVEKNIEKLKDIFLDVQK…
312950115	putative membrane protein [Mycoplasmopsis bovis PG45]	112	79.8	88.5	17.7	15.5	30	3	3	222.782	155.951	161.375	47.877	45.5887	95.9572	MPRDGFTLFCTDCKMENYISKKNKKNTPEKVELKKFCARCNASTLHKEKK
312950117	ribosomal protein L33 [Mycoplasmopsis bovis PG45]	1489.3	1817.6	2294.3	50.3	127.1	80.4	3	3	2962.41	3552.1	4183.52	136.057	373.828	257.165	MHTIKETANRLAKIETVEEISQKISTAKGFVVAEYRGLTVADLKNLRVSAKKLGIEVKVYKNRLFKLAAKKAGYDLDEHLVGPNLFVFSNLEDNAAAKVLVKFAKENKLLVPKAGVFENNVIDAKGVAEVASLPNYEEALSILARSLIAPLQQLSLSLKLYSEKESE
312950118	ribosomal protein L10 [Mycoplasmopsis bovis PG45]	1693.4	1792.3	2002.1	203.8	209.3	237.3	3	3	3368.39	3502.65	3650.71	551.262	615.595	759.021	MNLSNIPSKKKTVIIYGTICLLAIITLIACVVLITKFSNSQSKIWASAVVGLTISAIIASTVGLLLIRMYWSQNAIIKKSFNFFIDEIISHNSIGLLIYDNNFNILWTSSFIKNKFGRKWVGYTLAEFFKYYDSNFDTNLQSINFKDNENYYHAEIWPLKNCISIKDITLEQHMIQIYSNQLPVIGEVEIDNYQLYHSILSKEELYKVNQEFIAILDELVTKYNFVYRQYTNGKFLVFTNKESIDKMVSVDFSFFSKIHSALKNSKINNHLISISAGFALGYQNLWEKTEQAKNALLQAQSRGGDQVAIFSNVERPKYFGSSSEILYDISRTRIKRIADVIESKLRDPKIKKVICYGHSNADLDAIGSSLGIWALAKEYNKEAYICSVTQDSTTEAAIE…
312950119	DHH family protein [Mycoplasmopsis bovis PG45]	31.2	19.9	25.6	19.8	17.7	20	3	3	62.0608	38.8902	46.6801	53.5574	52.0594	63.9715	MAKLTKESFISSLKEMSIKEVMELVEAMKEEFGIDPSAVAVAAAAPAAEAEEKKSTLSVILKSDNGKKLAIVKAVKELLNLALMDANKLVSTLPATLKENIPAAEAEALKAKLVEAGADVELK
312950120	ribosomal protein L7/L12 [Mycoplasmopsis bovis PG45]	12170	13233.7	16833	582.7	596	619.6	3	3	24207.7	25862.3	30694	1576.16	1752.96	1981.84	MKKVIYDYEYAFKDNNNKDGAIIYCHGHNSKPEIFEMFQNYWTKTNYYALQFPGNNLVKPVKDHKLSVYQFAQLLINFIVDNGLKNVTLIGHSMGGGTISLAYKLRPDLIGKLIYIAPINKTTSLSKGKYKRNFEPKTLSEYHDFLRPLYYNFDALIANSEFSEEVKKAFDPERFSNPYIKELTMSMDASLYDEIESSLDSITVPTLLILGEKDGVIDSESCLEYFKEHVKNLESVIVPKSSHIIYLENWPVFIDAMDKFLNK
[truncated: 584 more rows]

## Sheet: Info 
Harvesting condition
Mmc GM12	1010 CFU/ml after 16±2 h
M. bovis PG45	109 CFU/ml after 30±2 h
Input protein
Mmc GM12 bacterial cells: 212 µg, 209 µg, 214 µg
Mmc GM12 EV: 318 µg, 324 µg, 234 µg
M. bovis PG45 bacterial cells: 224 µg, 215 µg, 220 µg
[truncated: 3 more rows]
